# Supplementary material for: Nickel-catalyzed regiodivergent sulfonylarylation of 1,3-enynes to access allenes and dienes
Source: Royal Society of Chemistry journal article supplement (doi:10.1039/d4sc03067b), 2024-01-01
Supplement: d4sc03067b1.pdf [file d4sc03067b1.pdf]

## Supplementary Information

### Nickel-Catalyzed Regiodivergent Sulfonylarylation of 1,3- Enynes to Access Allenes and Dienes

Zhuomin Chi, Yongchao Zhou, Bingbing Liu, Xiaojing Xu, Xueyuan Liu, Yongmin Liang\*

*State Key Laboratory of Applied Organic Chemistry and College of Chemistry and  
Chemical Engineering, Lanzhou University, Lanzhou 730000, P.R. China.*

\*E-mail: [liangym@lzu.edu.cn](mailto:liangym@lzu.edu.cn)

## Table of Contents

|                                                        |      |
|--------------------------------------------------------|------|
|                                                        |      |
| 1. General Information                                 | S3   |
| 2. Experimental Section                                | S4   |
| 2.1 Optimization of reaction conditions                | S4   |
| 2.2 General procedures for synthesis of substrates     | S11  |
| 2.3 General procedures for synthesis of products       | S12  |
| 2.4 Large-scale experiments                            | S13  |
| 2.5 Synthetic application                              | S14  |
| 2.6 Mechanistic Studies                                | S15  |
| 3. X-Ray Crystallographic Spectrum                     | S19  |
| 4. Characterization of unknown substrates and products | S20  |
| 4.1 Characterization of unknown substrates             | S20  |
| 4.2 Characterization of products                       | S22  |
| 5. NMR Spectra of Compounds                            | S49  |
| 6. References                                          | S144 |

## 1. General Information

Unless otherwise noted, commercially available reagents were purchased from commercial suppliers (such as Innochem, Alfa Aesar, J&K Chemical, Energy Chemical, Bidepharm and Adamas) and used as received without further purification. Solvents were generally dried over 4 Å molecular sieves (water <50ppm, resealable bottle). Purification of products was performed by flash chromatography (FC) using silica gel or preparative thin layer chromatography. <sup>1</sup>H and <sup>13</sup>C NMR spectra were recorded on a Bruker AVANCE III spectrometer (400 MHz and 101 MHz, respectively). Chemical shifts are reported parts per million (ppm) referenced to CDCl<sub>3</sub> (δ = 7.26 ppm), tetramethylsilane (TMS, δ = 0.00 ppm) for <sup>1</sup>H NMR and CDCl<sub>3</sub> (δ = 77.0 ppm) for <sup>13</sup>C NMR. Multiplicities are given as s (singlet), d (doublet), t (triplet), dd (doublet of doublets), td (triplet of doublets) or m (multiplet). High-resolution mass spectra (HRMS) were obtained using a Q-TOF instrument equipped with an ESI source. Data collection for crystal structure was performed on a Bruker APEXII diffractometer.

## 2. Experimental Section

### 2.1 Optimization of reaction conditions

The oven-dried Schlenk sealed tube (15 mL) containing a stirring bar was charged with 1,3-enyne substrate, arylboronic acid, sulfonyl chloride, Ni-catalyst, ligand, base and solvent under argon atmosphere. Then the tube was placed into a preheated oil bath with stirring for 24 h. Upon completion of the reaction, the crude reaction mixture was diluted with DCM, and filtrated. After the solvent was concentrated under reduced pressure, the crude <sup>1</sup>H NMR spectrum was taken using CH<sub>2</sub>Br<sub>2</sub> as internal standard. Yield was determined by <sup>1</sup>H NMR with CH<sub>2</sub>Br<sub>2</sub> as internal standard.

#### 2.1.1 Ligand screening

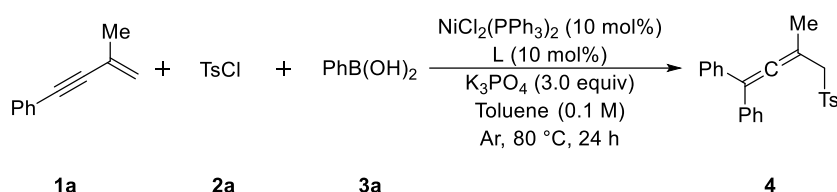

| Entry | Ligand | Yield |
|-------|--------|-------|
| 1     | L1     | 21%   |
| 2     | L2     | 4%    |
| 3     | L3     | 4%    |
| 4     | L4     | Trace |
| 5     | L5     | Trace |
| 6     | L6     | 20%   |
| 7     | L7     | 25%   |
| 8     | L8     | 21%   |
| 9     | L9     | Trace |
| 10    | L10    | N.D.  |
| 11    | L11    | 25%   |
| 12    | L12    | Trace |

Reaction conditions: 1,3-enyne (0.1 mmol, 1.0 equiv), arylboronic acids (0.2 mmol, 2.0 equiv), sulfonyl chlorides (0.2 mmol, 2.0 equiv), Ni-catalyst (10 mol%), ligand (10 mol%), base (0.3 mmol, 3.0 equiv) and solvent (1.0 mL), Ar, 80 °C, 24 h.



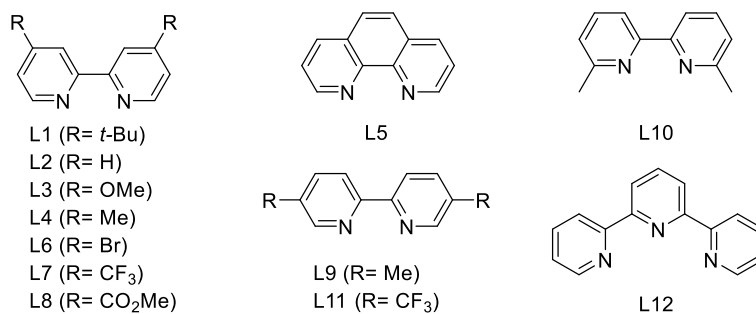

## 2.1.2 Ni-catalyst screening

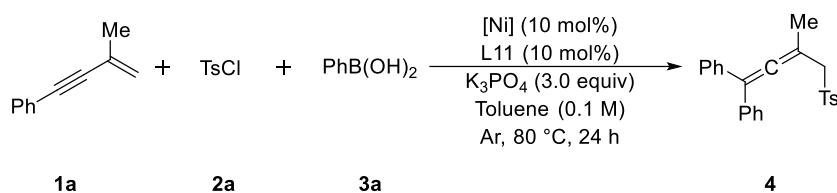

| Entry | [Ni]                                                 | Yield |
|-------|------------------------------------------------------|-------|
| 1     | NiBr <sub>2</sub> (PPh <sub>3</sub> ) <sub>2</sub>   | 30%   |
| 2     | NiCl <sub>2</sub> ·dppe                              | 38%   |
| 3     | NiCl <sub>2</sub> ·dppp                              | 34%   |
| 4     | NiCl <sub>2</sub> ·dppf                              | 24%   |
| 5     | NiCl <sub>2</sub> (Py) <sub>4</sub>                  | 14%   |
| 6     | NiCl <sub>2</sub> ·DME                               | 26%   |
| 7     | Ni(OTf) <sub>2</sub>                                 | 33%   |
| 8     | Ni(COD) <sub>2</sub>                                 | 37%   |
| 9     | Ni(NO <sub>3</sub> ) <sub>2</sub> ·6H <sub>2</sub> O | 16%   |

Reaction conditions: 1,3-enyne (0.1 mmol, 1.0 equiv), arylboronic acids (0.2 mmol, 2.0 equiv), sulfonyl chlorides (0.2 mmol, 2.0 equiv), Ni-catalyst (10 mol%), ligand (10 mol%), base (0.3 mmol, 3.0 equiv) and solvent (1.0 mL), Ar, 80 °C, 24 h.

## 2.1.3 Solvent screening

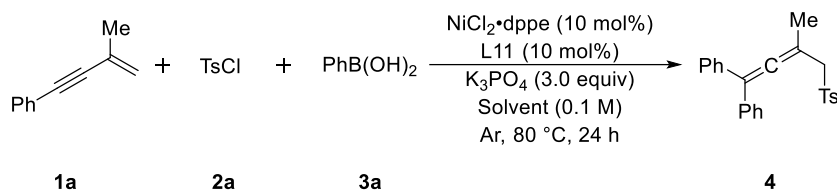

| Entry | Solvent         | Yield |
|-------|-----------------|-------|
| 1     | 1,4-Dioxane     | 46%   |
| 2     | DCE             | 35%   |
| 3     | DMF             | N.D.  |
| 4     | MeCN            | N.D.  |
| 5     | Acetone         | N.D.  |
| 6     | Xylene          | 35%   |
| 7     | Mesitylene      | 30%   |
| 8     | THF             | N.D.  |
| 9     | DME             | N.D.  |
| 10    | Tetrahydropyran | N.D.  |

Reaction conditions: 1,3-enyne (0.1 mmol, 1.0 equiv), arylboronic acids (0.2 mmol, 2.0 equiv), sulfonyl chlorides (0.2 mmol, 2.0 equiv), Ni-catalyst (10 mol%), ligand (10 mol%), base (0.3 mmol, 3.0 equiv) and solvent (1.0 mL), Ar, 80 °C, 24 h.

#### 2.1.4 Relative ratios screening

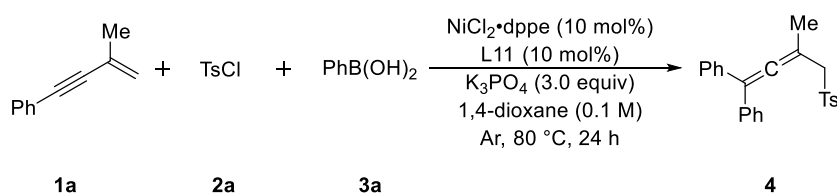

| Entry | 1a(mmol) | 2a(mmol) | 3a(mmol) | Yield |
|-------|----------|----------|----------|-------|
| 1     | 0.1      | 0.1      | 0.1      | 11%   |
| 2     | 0.1      | 0.15     | 0.15     | 26%   |
| 3     | 0.1      | 0.25     | 0.25     | 52%   |
| 4     | 0.1      | 0.3      | 0.3      | 52%   |
| 5     | 0.1      | 0.2      | 0.3      | 51%   |
| 6     | 0.1      | 0.3      | 0.2      | 24%   |
| 7     | 0.2      | 0.1      | 0.2      | 31%   |
| 8     | 0.2      | 0.2      | 0.1      | 15%   |

Reaction conditions: 1,3-enyne, arylboronic acids, sulfonyl chlorides, Ni-catalyst (10 mol%), ligand (10 mol%), base (0.3 mmol, 3.0 equiv) and solvent (1.0 mL), Ar, 80 °C, 24 h.

#### 2.1.5 Ni-catalyst screening

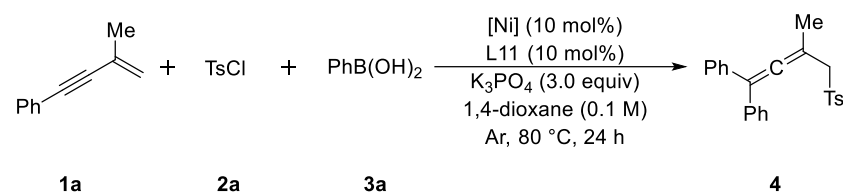

| Entry | [Ni]                     | Yield |
|-------|--------------------------|-------|
| 1     | $NiCl_2(PPh_3)_2$        | 51%   |
| 2     | $NiBr_2(PPh_3)_2$        | 40%   |
| 3     | $NiCl_2 \cdot dppe$      | 58%   |
| 4     | $NiCl_2 \cdot dppp$      | 31%   |
| 5     | $NiCl_2 \cdot dppf$      | 48%   |
| 6     | $NiCl_2(PCy_3)_2$        | 44%   |
| 7     | $NiCl_2(Py)_4$           | 20%   |
| 8     | $Ni(PPh_3)_4$            | 53%   |
| 9     | $Ni(OTf)_2$              | 57%   |
| 10    | $Ni(COD)_2$              | 51%   |
| 11    | $NiCl_2 \cdot DME$       | 50%   |
| 12    | $NiBr_2 \cdot DME$       | 62%   |
| 13    | $NiBr_2 \cdot diglyme$   | 45%   |
| 14    | $Ni(acac)_2$             | trace |
| 15    | $NiF_2$                  | N.D.  |
| 16    | $NiCl_2$                 | 14%   |
| 17    | $NiI_2$                  | 50%   |
| 18    | $Ni(NO_3)_2 \cdot 6H_2O$ | 41%   |
| 19    | $Ni(PO_4)_2 \cdot 8H_2O$ | N.D.  |

Reaction conditions: 1,3-enyne (0.1 mmol, 1.0 equiv), arylboronic acids (0.25 mmol, 2.5 equiv), sulfonyl chlorides (0.25 mmol, 2.5 equiv), Ni-catalyst (10 mol%), ligand (10 mol%), base (0.3 mmol, 3.0 equiv) and solvent (1.0 mL), Ar, 80 °C, 24 h.

### 2.1.6 Base screening

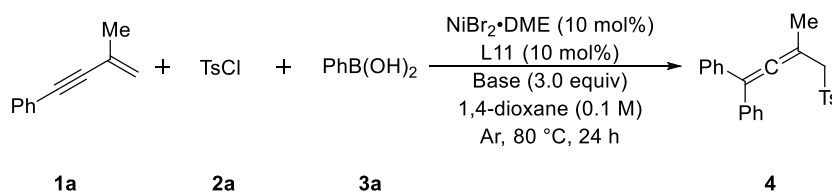

| Entry | Base                            | Yield |
|-------|---------------------------------|-------|
| 1     | K <sub>2</sub> CO <sub>3</sub>  | 57%   |
| 2     | K <sub>2</sub> HPO <sub>4</sub> | 35%   |
| 3     | <i>t</i> -BuOK                  | 16    |
| 4     | AcOK                            | N.D.  |
| 5     | KHCO <sub>3</sub>               | N.D.  |
| 6     | Na <sub>3</sub> PO <sub>4</sub> | 40%   |
| 7     | Na <sub>2</sub> CO <sub>3</sub> | 31%   |
| 8     | Cs <sub>2</sub> CO <sub>3</sub> | N.D.  |

Reaction conditions: 1,3-enyne (0.1 mmol, 1.0 equiv), arylboronic acids (0.25 mmol, 2.5 equiv), sulfonyl chlorides (0.25 mmol, 2.5 equiv), Ni-catalyst (10 mol%), ligand (10 mol%), base (0.3 mmol, 3.0 equiv) and solvent (1.0 mL), Ar, 80 °C, 24 h.

### 2.1.7 Relative ratios screening

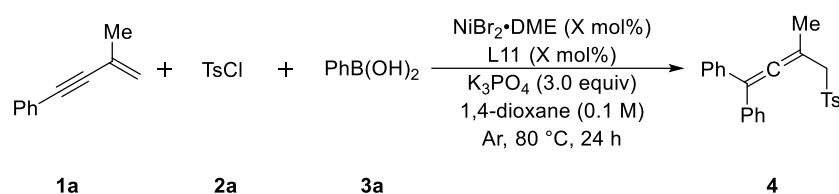

| Entry | NiBr <sub>2</sub> ·DME | L11  | Yield |
|-------|------------------------|------|-------|
| 1     | 5.0%                   | 7.5% | 46%   |
| 2     | 10%                    | 15%  | 44%   |
| 3     | 10%                    | 20%  | 36%   |
| 4     | 12%                    | 12%  | 69%   |
| 5     | 12%                    | 15%  | 56%   |
| 6     | 15%                    | 15%  | 65%   |
| 7     | 15%                    | 20%  | 63%   |

Reaction conditions: 1,3-enyne (0.1 mmol, 1.0 equiv), arylboronic acids (0.25 mmol, 2.5 equiv), sulfonyl chlorides (0.25 mmol, 2.5 equiv), Ni-catalyst, ligand, base (0.3 mmol, 3.0 equiv) and solvent (1.0 mL), Ar, 80 °C, 24 h.

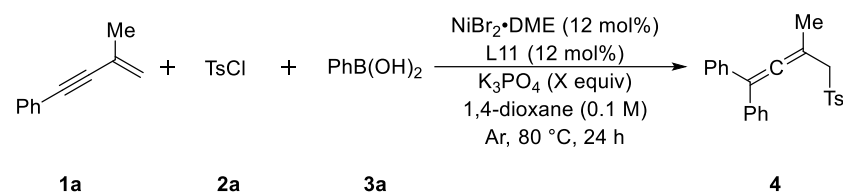

| Entry | $\text{K}_3\text{PO}_4(\text{eq})$ | Yield |
|-------|------------------------------------|-------|
| 1     | 1.5                                | 55%   |
| 2     | 2.0                                | 65%   |
| 3     | 2.5                                | 66%   |
| 4     | 3.5                                | 57%   |
| 5     | 4.0                                | 50%   |

Reaction conditions: 1,3-enyne (0.1 mmol, 1.0 equiv), arylboronic acids (0.25 mmol, 2.5 equiv), sulfonyl chlorides (0.25 mmol, 2.5 equiv), Ni-catalyst (12 mol%), ligand (12 mol%), base and solvent (1.0 mL), Ar, 80 °C, 24 h.

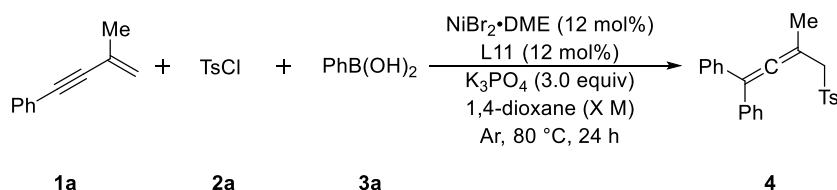

| Entry | 1,4-dioxane(mL) | Yield |
|-------|-----------------|-------|
| 1     | 0.5             | 82%   |
| 2     | 1.5             | 69%   |
| 3     | 2.0             | 69%   |

Reaction conditions: 1,3-enyne (0.1 mmol, 1.0 equiv), arylboronic acids (0.25 mmol, 2.5 equiv), sulfonyl chlorides (0.25 mmol, 2.5 equiv), Ni-catalyst (12 mol%), ligand (12 mol%), base (0.3 mmol, 3.0 equiv) and solvent, Ar, 80 °C, 24 h.

### 2.1.8 Temperature screening

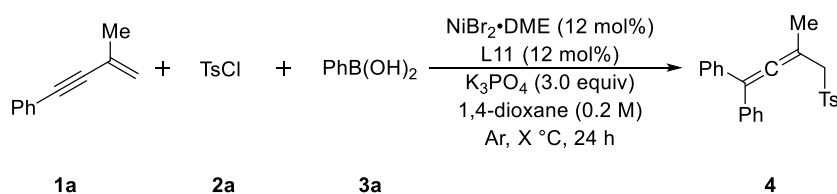

| Entry | T(°C) | Yield |
|-------|-------|-------|
| 1     | 40    | 38%   |
| 2     | 50    | 63%   |
| 3     | 60    | 71%   |
| 4     | 70    | 75%   |
| 5     | 90    | 58%   |
| 6     | 100   | 53%   |

Reaction conditions: 1,3-enyne (0.1 mmol, 1.0 equiv), arylboronic acids (0.25 mmol, 2.5 equiv), sulfonyl chlorides (0.25 mmol, 2.5 equiv), Ni-catalyst (12 mol%), ligand (12 mol%), base (0.3 mmol, 3.0 equiv) and solvent (0.5 mL), Ar, 24 h.

### 2.1.9 Control reactions

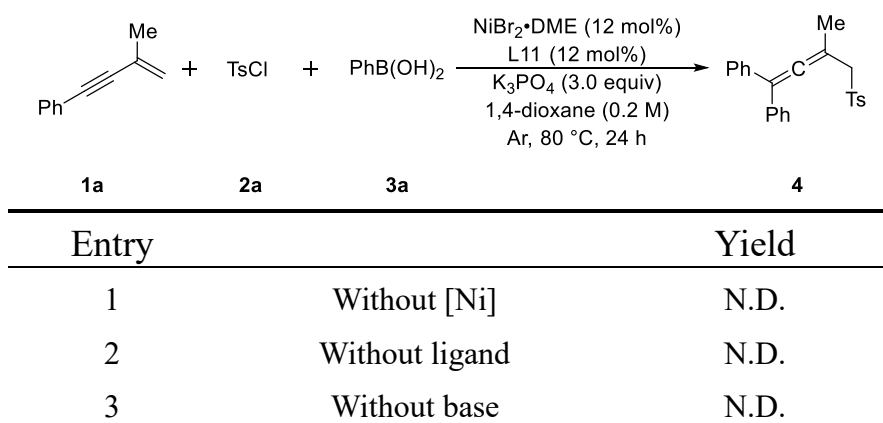

Reaction conditions: 1,3-enyne (0.1 mmol, 1.0 equiv), arylboronic acids (0.25 mmol, 2.5 equiv), sulfonyl chlorides (0.25 mmol, 2.5 equiv), Ni-catalyst (12 mol%), ligand (12 mol%), base (0.3 mmol, 3.0 equiv) and solvent (0.5 mL), Ar, 80 °C, 24 h.

### 2.1.10 Ligand screening

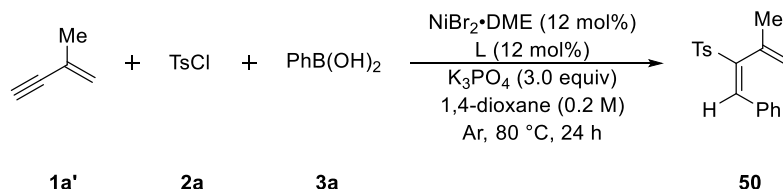

| Entry | Ligand | Yield |
|-------|--------|-------|
| 1     | L1     | 33%   |
| 2     | L2     | Trace |
| 3     | L3     | Trace |
| 4     | L4     | N.D.  |
| 5     | L5     | Trace |
| 6     | L6     | 16%   |
| 7     | L7     | 55%   |
| 8     | L8     | 26%   |
| 9     | L9     | 5%    |
| 10    | L10    | N.D.  |
| 11    | L11    | 60%   |
| 12    | L12    | N.D.  |

Reaction conditions: 1,3-enyne (0.1 mmol, 1.0 equiv), arylboronic acids (0.25 mmol, 2.5 equiv), sulfonyl chlorides (0.25 mmol, 2.5 equiv), Ni-catalyst (12 mol%), ligand (12 mol%), base (0.3 mmol, 3.0 equiv) and solvent (0.5 mL), Ar, 80 °C, 24 h.

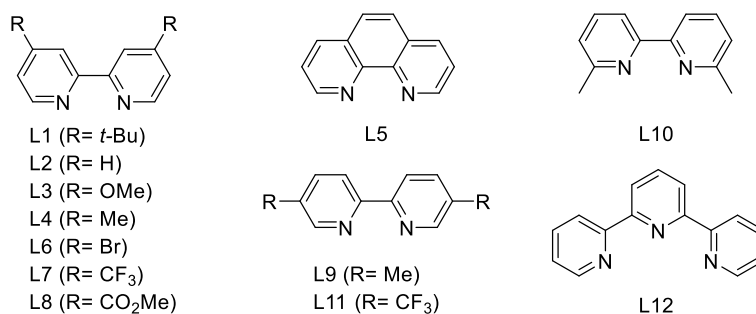

## 2.2 General procedures for synthesis of substrates

### 2.2.1 General procedure A

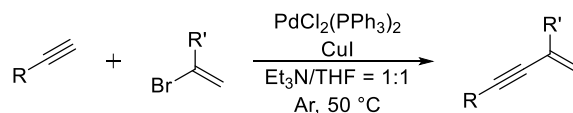

The oven-dried Schlenk flask containing a stirring bar was charged with PdCl<sub>2</sub>(PPh<sub>3</sub>)<sub>2</sub> (2.0 mmol%) and CuI (5.0 mmol%). The mixture was evacuated and back-filled with Ar for 3 times. Dry THF and Et<sub>3</sub>N was respectively added under a stream of argon, and the substituted alkyne (1.0 equiv) and substituted 2-Bromopropene (1.2 equiv) was successively added carefully at room temperature. Then, the reaction mixture was stirred and heated to 50 °C under argon atmosphere. After completion (monitored by TLC), the reaction was cooled to room temperature and diluted with ethyl acetate and washed with brine. The

organic layer was dried over anhydrous  $\text{Na}_2\text{SO}_4$  and filtrated. After the solvent was concentrated under reduced pressure, the crude product was purified by flash silica gel column chromatography (PE) to afford the desired products.<sup>[1]</sup>

### 2.2.2 General procedure B

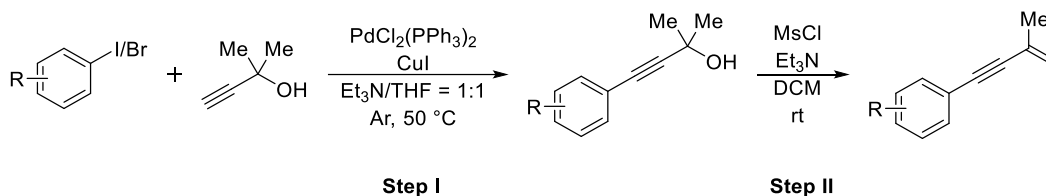

**Step I:** The oven-dried Schlenk flask containing a stirring bar was charged with  $\text{PdCl}_2(\text{PPh}_3)_2$  (2.0 mmol%) and  $\text{CuI}$  (5.0 mmol%). The mixture was evacuated and back-filled with Ar for 3 times. Dry THF and  $\text{Et}_3\text{N}$  was respectively added under a stream of argon, and the substituted aryl halides (1.0 equiv) and 2-methyl-3-butyn-2-ol (1.2 equiv) was added carefully at room temperature. Then, the reaction mixture was stirred and heated to 50 °C under argon atmosphere. After completion (monitored by TLC), the reaction was cooled to room temperature and diluted with ethyl acetate and washed with brine. The organic layer was dried over anhydrous  $\text{Na}_2\text{SO}_4$  and filtrated. After the solvent was concentrated under reduced pressure, the crude product was purified by flash silica gel column chromatography (PE:EA=5:1-1:1) to afford the desired products.

**Step II:** The resulting propargyl alcohol (1.0 equiv) was dissolved in DCM, and the mixture was cooled to 0 °C. After  $\text{Et}_3\text{N}$  (5.0 equiv) was added to this solution, methylsulfonyl chloride (2.0 equiv) was added carefully at 0 °C. Then, the reaction mixture was stirred at room temperature. After completion (monitored by TLC), the reaction was diluted with dichloromethane and washed with brine. The organic layer was dried over anhydrous  $\text{Na}_2\text{SO}_4$  and filtrated. After the solvent was concentrated under reduced pressure, the crude product was purified by flash silica gel column chromatography (PE:EA=100:1-10:1) to afford the desired products.<sup>[2]</sup>

### 2.3 General procedures for synthesis of products

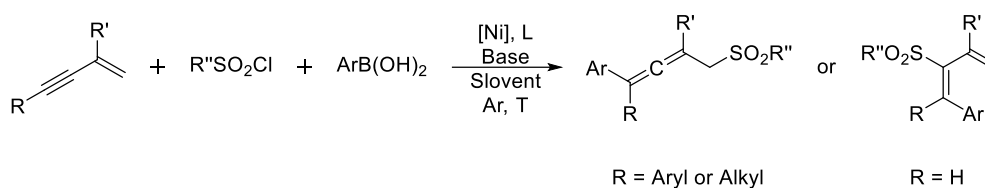

The oven-dried Schlenk sealed tube (15 mL) containing a stirring bar was charged with 1,3-enyne



substrates (0.1 mmol, 1.0 equiv), arylboronic acids (0.25 mmol, 2.5 equiv), sulfonyl chlorides (0.25 mmol, 2.5 equiv), NiBr<sub>2</sub>•DME (12 mol%), 5,5'-Bis(trifluoromethyl)-2,2'-bipyridine (12 mol%), K<sub>3</sub>PO<sub>4</sub> (0.3 mmol, 3.0 equiv) and 1,4-dioxane (0.5 mL) under argon atmosphere. Then the tube was placed into a preheated oil bath at 80 °C with stirring for 24 h. Upon completion of the reaction, the crude reaction mixture was diluted with DCM, and filtrated. After the solvent was concentrated under reduced pressure, the crude <sup>1</sup>H NMR spectrum was taken using CH<sub>2</sub>Br<sub>2</sub> as internal standard. The resulting residue was purified by flash silica gel column chromatography or preparative thin layer chromatography to give the desired products.

## 2.4 Large-scale experiments

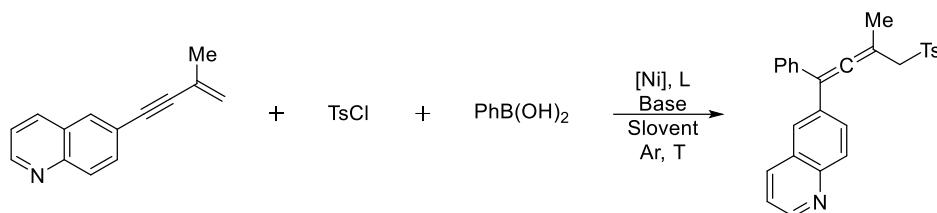

The oven-dried Schlenk sealed tube (100 mL) containing a stirring bar was charged with 1,3-enyne substrates (3.0 mmol, 1.0 equiv), arylboronic acids (7.5 mmol, 2.5 equiv), sulfonyl chlorides (7.5 mmol, 2.5 equiv), NiBr<sub>2</sub>•DME (12 mol%), 5,5'-Bis(trifluoromethyl)-2,2'-bipyridine (12 mol%), K<sub>3</sub>PO<sub>4</sub> (9 mmol, 3.0 equiv) and 1,4-dioxane (15 mL) under argon atmosphere. Then the tube was placed into a preheated oil bath at 80 °C with stirring for 24 h. Upon completion of the reaction, the crude reaction mixture was diluted with DCM, and filtrated. After the solvent was concentrated under reduced pressure, the resulting residue was purified by flash silica gel column chromatography (PE:EA=5:1-1:1) to give the desired products in 68%.

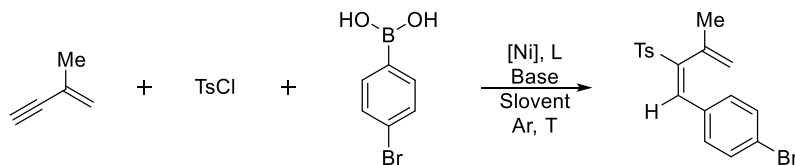

The oven-dried Schlenk sealed tube (100 mL) containing a stirring bar was charged with 1,3-enyne substrates (5.0 mmol, 1.0 equiv), arylboronic acids (12.5 mmol, 2.5 equiv), sulfonyl chlorides (12.5 mmol, 2.5 equiv), NiBr<sub>2</sub>•DME (12 mol%), 5,5'-Bis(trifluoromethyl)-2,2'-bipyridine (12 mol%), K<sub>3</sub>PO<sub>4</sub> (15 mmol, 3.0 equiv) and 1,4-dioxane (25 mL) under argon atmosphere. Then the tube was placed into a preheated oil bath at 80 °C with stirring for 24 h. Upon completion of the reaction, the crude reaction

mixture was diluted with DCM, and filtrated. After the solvent was concentrated under reduced pressure, the resulting residue was purified by flash silica gel column chromatography (PE:EA=20:1-10:1) to give the desired products in 60%.

## 2.5 Synthetic application

### 2.5.1 Synthetic transformations

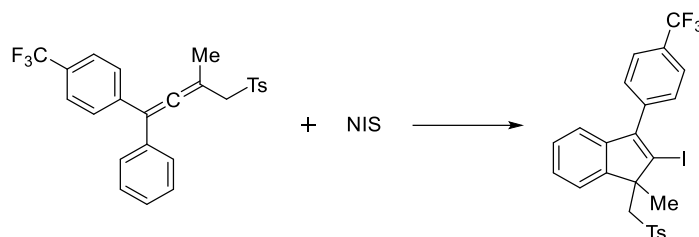

The oven-dried Schlenk sealed tube (15 mL) containing a stirring bar was charged with **26** substrate (0.1 mmol, 1.0 equiv), NIS (0.2 mmol, 2.0 equiv), and MeNO<sub>2</sub> (1.5 mL) under air atmosphere. Then, the reaction mixture was stirred at room temperature for 30 min. After completion (monitored by TLC), the solvent was concentrated under reduced pressure. The crude product was purified by flash silica gel column chromatography (PE:EA=15:1-10:1) to afford the desired products.<sup>[3]</sup>

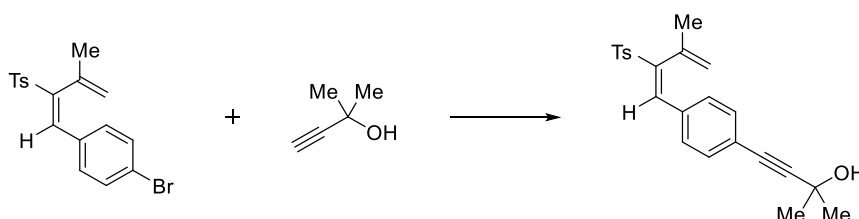

The oven-dried Schlenk flask containing a stirring bar was charged with **54** substrate (0.1 mmol, 1.0 equiv), Pd(OAc)<sub>2</sub> (2.0 mmol%), PPh<sub>3</sub> (2.0 mmol%) and CuI (5.0 mmol%). The mixture was evacuated and back-filled with Ar for 3 times. Dry Et<sub>3</sub>N was added under a stream of argon, and 2-methyl-3-butyn-2-ol (1.2 equiv) was added carefully at room temperature. Then, the reaction mixture was stirred and heated to 50 °C under argon atmosphere. After completion (monitored by TLC), the reaction was cooled to room temperature and diluted with ethyl acetate and washed with brine. The organic layer was dried over anhydrous Na<sub>2</sub>SO<sub>4</sub> and filtrated. After the solvent was concentrated under reduced pressure, the crude product was purified by flash silica gel column chromatography (PE:EA=5:1-1:1) to afford the desired products.<sup>[4]</sup>

### 2.5.2 Utilization of another type of radical precursor

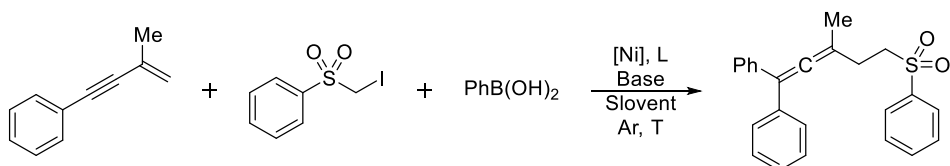

The oven-dried Schlenk sealed tube (15 mL) containing a stirring bar was charged with 1,3-enyne substrates (0.1 mmol, 1.0 equiv), arylboronic acids (0.25 mmol, 2.5 equiv), ((iodomethyl)sulfonyl)benzene (0.25 mmol, 2.5 equiv), NiBr<sub>2</sub>•DME (12 mol%), 5,5'-Bis(trifluoromethyl)-2,2'-bipyridine (12 mol%), K<sub>3</sub>PO<sub>4</sub> (0.3 mmol, 3.0 equiv) and 1,4-dioxane (0.5 mL) under argon atmosphere. Then the tube was placed into a preheated oil bath at 80 °C with stirring for 24 h. Upon completion of the reaction, the crude reaction mixture was diluted with DCM, and filtrated. After the solvent was concentrated under reduced pressure, the crude <sup>1</sup>H NMR spectrum was taken using CH<sub>2</sub>Br<sub>2</sub> as internal standard. The resulting residue was purified by flash silica gel column chromatography (PE:EA=20:1-10:1) to give the desired products.

### 2.5.3 Utilization of CO

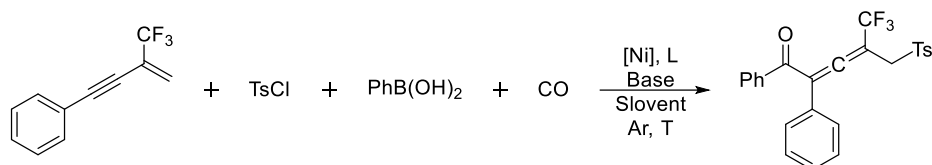

The oven-dried Schlenk sealed tube (15 mL) containing a stirring bar was charged with 1,3-enyne substrates (0.1 mmol, 1.0 equiv), arylboronic acids (0.25 mmol, 2.5 equiv), sulfonyl chlorides (0.25 mmol, 2.5 equiv), NiBr<sub>2</sub>•DME (12 mol%), 5,5'-Bis(trifluoromethyl)-2,2'-bipyridine (12 mol%), K<sub>3</sub>PO<sub>4</sub> (0.3 mmol, 3.0 equiv) and 1,4-dioxane (0.5 mL) under argon atmosphere. The mixture was evacuated and back-filled with CO (1atm) for 3 times. Then the tube was placed into a preheated oil bath at 80 °C with stirring for 24 h. Upon completion of the reaction, the crude reaction mixture was diluted with DCM, and filtrated. After the solvent was concentrated under reduced pressure, the crude <sup>1</sup>H NMR spectrum was taken using CH<sub>2</sub>Br<sub>2</sub> as internal standard. The resulting residue was purified by preparative thin layer chromatography (PE:EA=20:1-10:1) to give the desired products.

## 2.6 Mechanistic Studies

### 2.6.1 Radical inhibition experiments

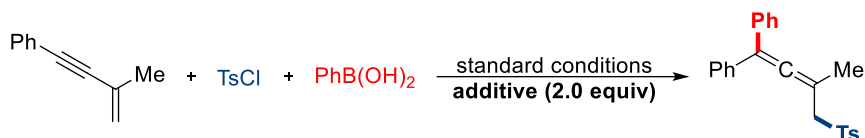

The oven-dried Schlenk sealed tube (15 mL) containing a stirring bar was charged with **TEMPO** (0.2 mmol, 2.0 equiv) 1,3-enyne substrates (0.1 mmol, 1.0 equiv), arylboronic acids (0.25 mmol, 2.5 equiv), sulfonyl chlorides (0.25 mmol, 2.5 equiv), NiBr<sub>2</sub>•DME (12 mol%), 5,5'-Bis(trifluoromethyl)-2,2'-bipyridine (12 mol%), K<sub>3</sub>PO<sub>4</sub> (0.3 mmol, 3.0 equiv) and 1,4-dioxane (0.5 mL) under argon atmosphere. Then the tube was placed into a preheated oil bath at 80 °C with stirring for 24 h. Upon completion of the reaction, the crude reaction mixture was diluted with DCM, and filtrated. After the solvent was concentrated under reduced pressure, the crude <sup>1</sup>H NMR spectrum was taken using CH<sub>2</sub>Br<sub>2</sub> as internal standard. No expected product was observed.

The oven-dried Schlenk sealed tube (15 mL) containing a stirring bar was charged with **1,1-diphenylethylene** (0.2 mmol, 2.0 equiv) 1,3-enyne substrates (0.1 mmol, 1.0 equiv), arylboronic acids (0.25 mmol, 2.5 equiv), sulfonyl chlorides (0.25 mmol, 2.5 equiv), NiBr<sub>2</sub>•DME (12 mol%), 5,5'-Bis(trifluoromethyl)-2,2'-bipyridine (12 mol%), K<sub>3</sub>PO<sub>4</sub> (0.3 mmol, 3.0 equiv) and 1,4-dioxane (0.5 mL) under argon atmosphere. Then the tube was placed into a preheated oil bath at 80 °C with stirring for 24 h. Upon completion of the reaction, the crude reaction mixture was diluted with DCM, and filtrated. After the solvent was concentrated under reduced pressure, the crude <sup>1</sup>H NMR spectrum was taken using CH<sub>2</sub>Br<sub>2</sub> as internal standard. The resulting residue was purified by preparative thin layer chromatography to give the desired products in 20% yield. Fortunately, **78** product was detected in 30% yield.

The oven-dried Schlenk sealed tube (15 mL) containing a stirring bar was charged with 1,3-enyne substrates (0.1 mmol, 1.0 equiv), arylboronic acids (0.25 mmol, 2.5 equiv), sulfonyl chlorides (0.25 mmol, 2.5 equiv), NiBr<sub>2</sub>•DME (12 mol%), 5,5'-Bis(trifluoromethyl)-2,2'-bipyridine (12 mol%), K<sub>3</sub>PO<sub>4</sub> (0.3 mmol, 3.0 equiv) and 1,4-dioxane (0.5 mL) under **air** atmosphere. Then the tube was placed into a preheated oil bath at 80 °C with stirring for 24 h. Upon completion of the reaction, the crude reaction mixture was diluted with DCM, and filtrated. After the solvent was concentrated under reduced pressure, the crude <sup>1</sup>H NMR spectrum was taken using CH<sub>2</sub>Br<sub>2</sub> as internal standard. No expected product was observed.

## 2.6.2 Radical clock experiment

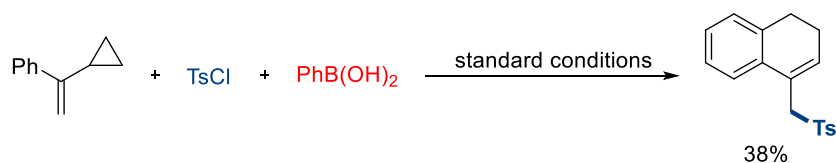

The oven-dried Schlenk sealed tube (15 mL) containing a stirring bar was charged with (1-cyclopropylvinyl)benzene (0.1 mmol, 1.0 equiv), arylboronic acids (0.25 mmol, 2.5 equiv), sulfonyl chlorides (0.25 mmol, 2.5 equiv),  $\text{NiBr}_2 \cdot \text{DME}$  (12 mol%), 5,5'-Bis(trifluoromethyl)-2,2'-bipyridine (12 mol%),  $\text{K}_3\text{PO}_4$  (0.3 mmol, 3.0 equiv) and 1,4-dioxane (0.5 mL) under argon atmosphere. Then the tube was placed into a preheated oil bath at 80 °C with stirring for 24 h. Upon completion of the reaction, the crude reaction mixture was diluted with DCM, and filtrated. After the solvent was concentrated under reduced pressure, the crude  $^1\text{H}$  NMR spectrum was taken using  $\text{CH}_2\text{Br}_2$  as internal standard. The resulting residue was purified by preparative thin layer chromatography to give the **79** product in 38% yield.

### 2.6.3 Probe for putative intermediates

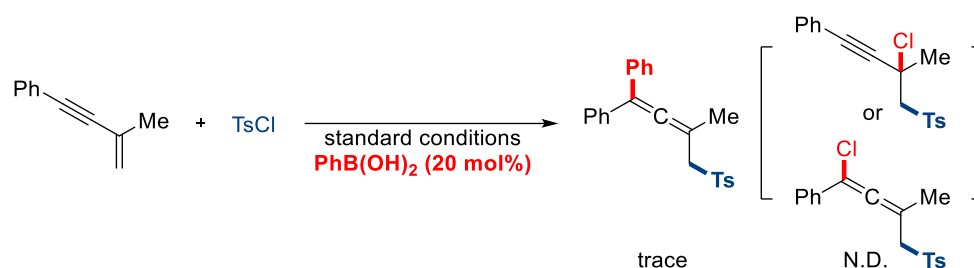

The oven-dried Schlenk sealed tube (15 mL) containing a stirring bar was charged with 1,3-enyne substrates (0.1 mmol, 1.0 equiv), **arylboronic acids (20 mol%)**, sulfonyl chlorides (0.25 mmol, 2.5 equiv),  $\text{NiBr}_2 \cdot \text{DME}$  (12 mol%), 5,5'-Bis(trifluoromethyl)-2,2'-bipyridine (12 mol%),  $\text{K}_3\text{PO}_4$  (0.3 mmol, 3.0 equiv) and 1,4-dioxane (0.5 mL) under argon atmosphere. Then the tube was placed into a preheated oil bath at 80 °C with stirring for 24 h. Upon completion of the reaction, the crude reaction mixture was diluted with DCM, and filtrated. After the solvent was concentrated under reduced pressure, the crude  $^1\text{H}$  NMR spectrum was taken using  $\text{CH}_2\text{Br}_2$  as internal standard. The resulting residue was purified by preparative thin layer chromatography to give the desired products in 5% yield.

### 2.6.4 Control experiments in the dark:

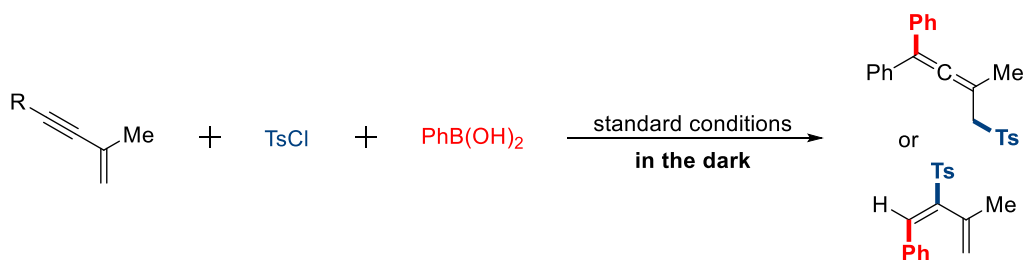

The oven-dried Schlenk sealed tube (15 mL) containing a stirring bar was charged with 1,3-enyne substrates (0.1 mmol, 1.0 equiv), arylboronic acids (0.25 mmol, 2.5 equiv), sulfonyl chlorides (0.25 mmol, 2.5 equiv), NiBr<sub>2</sub>·DME (12 mol%), 5,5'-Bis(trifluoromethyl)-2,2'-bipyridine (12 mol%), K<sub>3</sub>PO<sub>4</sub> (0.3 mmol, 3.0 equiv) and 1,4-dioxane (0.5 mL) under argon atmosphere. Then the tube was placed into a preheated oil bath at 80 °C with stirring for 24 h **in the dark**. Upon completion of the reaction, the crude reaction mixture was diluted with DCM, and filtrated. After the solvent was concentrated under reduced pressure, the crude <sup>1</sup>H NMR spectrum was taken using CH<sub>2</sub>Br<sub>2</sub> as internal standard. The resulting residue was purified by preparative thin layer chromatography to give the desired products.

### 2.6.5 Control experiments with other terminal alkynes:

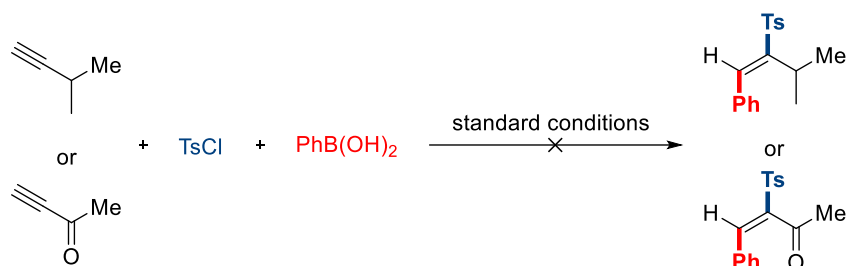

The oven-dried Schlenk sealed tube (15 mL) containing a stirring bar was charged with terminal alkynes substrates (0.1 mmol, 1.0 equiv), arylboronic acids (0.25 mmol, 2.5 equiv), sulfonyl chlorides (0.25 mmol, 2.5 equiv), NiBr<sub>2</sub>·DME (12 mol%), 5,5'-Bis(trifluoromethyl)-2,2'-bipyridine (12 mol%), K<sub>3</sub>PO<sub>4</sub> (0.3 mmol, 3.0 equiv) and 1,4-dioxane (0.5 mL) under argon atmosphere. Then the tube was placed into a preheated oil bath at 80 °C with stirring for 24 h. Upon completion of the reaction, the crude reaction mixture was diluted with DCM, and filtrated. The solvent was concentrated under reduced pressure and no expected product was observed.

### 3. X-Ray Crystallographic Spectrum

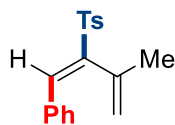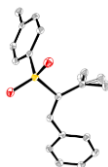

The CCDC number of this compound is **2344342**.

**Table 1.** Crystal data and structure refinement for **50**.

|                                             |                                                               |
|---------------------------------------------|---------------------------------------------------------------|
| Identification code                         | 50                                                            |
| Empirical formula                           | C <sub>18</sub> H <sub>18</sub> O <sub>2</sub> S              |
| Formula weight                              | 298.38                                                        |
| Temperature/K                               | 150.00(10)                                                    |
| Crystal system                              | Triclinic                                                     |
| Space group                                 | P-1                                                           |
| a/Å                                         | 9.12295(12)                                                   |
| b/Å                                         | 9.29509(14)                                                   |
| c/Å                                         | 10.32066(17)                                                  |
| α/°                                         | 66.4462(15)                                                   |
| β/°                                         | 78.6780(13)                                                   |
| γ/°                                         | 73.4692(12)                                                   |
| Volume/Å <sup>3</sup>                       | 765.70(2)                                                     |
| Z                                           | 2                                                             |
| ρ <sub>calc</sub> /cm <sup>3</sup>          | 1.294                                                         |
| μ/mm <sup>-1</sup>                          | 1.883                                                         |
| F(000)                                      | 316.0                                                         |
| Crystal size/mm <sup>3</sup>                | 0.12 × 0.07 × 0.06                                            |
| Radiation                                   | Cu Kα (λ = 1.54184)                                           |
| Theta range for data collection/°           | 9.39 to 133.18                                                |
| Index ranges                                | -10 ≤ h ≤ 10, -11 ≤ k ≤ 11, -12 ≤ l ≤ 12                      |
| Reflections collected                       | 12187                                                         |
| Independent reflections                     | 2674 [R <sub>int</sub> = 0.0281, R <sub>sigma</sub> = 0.0175] |
| Data/restraints/parameters                  | 2674/61/212                                                   |
| Goodness-of-fit on F <sup>2</sup>           | 1.052                                                         |
| Final R indexes [I ≥ 2σ(I)]                 | R1 = 0.0313, wR2 = 0.0855                                     |
| Final R indexes [all data]                  | R1 = 0.0317, wR2 = 0.0859                                     |
| Largest diff. peak/hole / e Å <sup>-3</sup> | 0.32/-0.33                                                    |

## 4. Characterization of unknown substrates and products

### 4.1 Characterization of unknown substrates

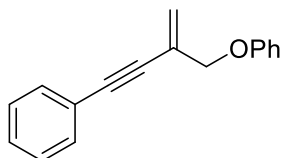

#### (2-methylene-4-phenylbut-3-yn-1-yl)oxybenzene

$^1\text{H NMR}$  (400 MHz,  $\text{CDCl}_3$ ):  $\delta$  7.41 – 7.35 (m, 2H), 7.27 – 7.18 (m, 5H), 6.93 – 6.85 (m, 3H), 5.61 (q,  $J = 1.7$  Hz, 1H), 5.59 (q,  $J = 1.5$  Hz, 1H), 4.58 – 4.52 (m, 2H).

$^{13}\text{C NMR}$  (101 MHz,  $\text{CDCl}_3$ ):  $\delta$  158.2, 131.6, 129.4, 128.5, 128.3, 127.0, 122.7, 122.1, 121.1, 114.9, 90.7, 86.8, 69.4.

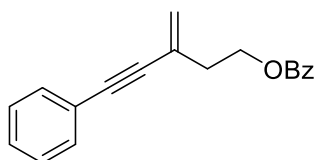

#### 3-methylene-5-phenylpent-4-yn-1-yl benzoate

$^1\text{H NMR}$  (400 MHz,  $\text{CDCl}_3$ ):  $\delta$  8.08 – 8.03 (m, 2H), 7.57 – 7.51 (m, 1H), 7.45 – 7.38 (m, 4H), 7.34 – 7.27 (m, 3H), 5.56 (d,  $J = 1.6$  Hz, 1H), 5.45 (d,  $J = 1.7$  Hz, 1H), 4.57 (t,  $J = 6.5$  Hz, 2H), 2.72 (t,  $J = 6.5$  Hz, 2H).

$^{13}\text{C NMR}$  (101 MHz,  $\text{CDCl}_3$ ):  $\delta$  166.4, 132.8, 131.5, 130.1, 129.5, 128.3, 128.2, 128.2, 127.6, 123.4, 122.8, 89.8, 88.8, 63.1, 36.5.

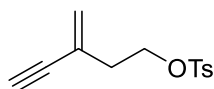

#### 3-methylenepent-4-yn-1-yl 4-methylbenzenesulfonate

$^1\text{H NMR}$  (400 MHz,  $\text{CDCl}_3$ ):  $\delta$  7.79 (d,  $J = 8.3$  Hz, 2H), 7.34 (d,  $J = 8.1$  Hz, 2H), 5.48 (s, 1H), 5.35 (s, 1H), 4.20 (t,  $J = 6.5$  Hz, 2H), 2.83 (s, 1H), 2.49 (t,  $J = 6.6$  Hz, 2H), 2.45 (s, 3H).

$^{13}\text{C NMR}$  (101 MHz,  $\text{CDCl}_3$ ):  $\delta$  144.7, 133.0, 129.7, 127.9, 125.8, 125.0, 82.3, 78.1, 67.8, 36.3, 21.6.

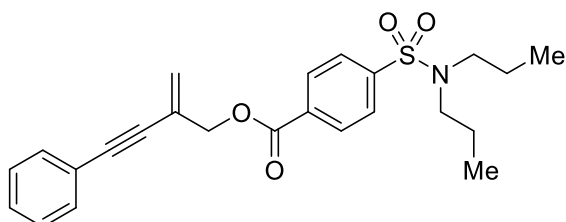

#### 2-methylene-4-phenylbut-3-yn-1-yl 4-(N,N-dipropylsulfamoyl)benzoate

$^1\text{H NMR}$  (400 MHz,  $\text{CDCl}_3$ ):  $\delta$  8.23 (d,  $J = 8.5$  Hz, 2H), 7.89 (d,  $J = 8.5$  Hz, 2H), 7.47 – 7.40 (m, 2H), 7.36 – 7.29 (m, 3H), 5.72 – 5.69 (m, 1H), 5.68 – 5.65 (m, 1H), 4.96 (s, 2H), 3.14 – 3.06 (m, 4H), 1.60 – 1.48 (m, 4H), 0.87 (t,  $J = 7.4$  Hz, 6H).

$^{13}\text{C NMR}$  (101 MHz,  $\text{CDCl}_3$ ):  $\delta$  164.6, 144.3, 133.1, 131.6, 130.3, 128.6, 128.3, 127.0, 126.1, 123.2,



122.4, 90.9, 86.4, 66.6, 49.8, 21.9, 11.1.

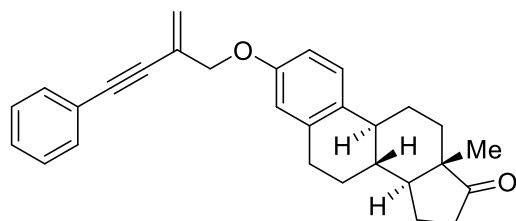

**(8R,9S,13S,14S)-13-methyl-3-((2-methylene-4-phenylbut-3-yn-1-yl)oxy)-6,7,8,9,11,12,13,14,15,16-decahydro-17H-cyclopenta[a]phenanthren-17-one**

**<sup>1</sup>H NMR (400 MHz, CDCl<sub>3</sub>):**  $\delta$  7.50 – 7.42 (m, 2H), 7.36 – 7.28 (m, 3H), 7.21 (d,  $J$  = 8.6 Hz, 1H), 6.78 (dd,  $J$  = 8.9, 2.7 Hz, 1H), 6.71 (d,  $J$  = 2.7 Hz, 1H), 5.70 (t,  $J$  = 1.7 Hz, 1H), 5.66 (t,  $J$  = 1.6 Hz, 1H), 4.60 (d,  $J$  = 1.8 Hz, 2H), 2.94 – 2.85 (m, 2H), 2.55 – 2.44 (m, 1H), 2.43 – 2.35 (m, 1H), 2.25 (td,  $J$  = 10.7, 3.9 Hz, 1H), 2.16 – 1.93 (m, 4H), 1.62 – 1.42 (m, 6H), 0.90 (s, 3H).

**<sup>13</sup>C NMR (101 MHz, CDCl<sub>3</sub>):**  $\delta$  156.2, 137.7, 132.4, 131.6, 128.4, 128.3, 127.0, 126.3, 122.6, 121.9, 114.8, 112.4, 90.6, 86.8, 69.4, 50.3, 47.9, 43.9, 38.2, 35.8, 31.5, 29.6, 26.4, 25.8, 21.5, 13.8.

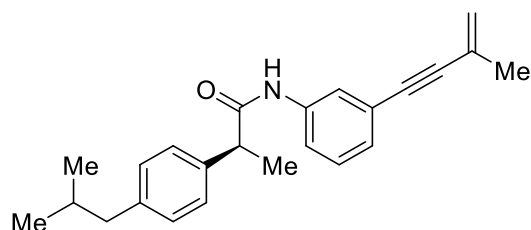

**(S)-2-(4-isobutylphenyl)-N-(3-(3-methylbut-3-en-1-yn-1-yl)phenyl)propanamide**

**<sup>1</sup>H NMR (400 MHz, CDCl<sub>3</sub>):**  $\delta$  7.52 (t,  $J$  = 1.9 Hz, 1H), 7.40 (dt,  $J$  = 8.2, 1.6 Hz, 1H), 7.24 (d,  $J$  = 7.9 Hz, 2H), 7.21 – 7.11 (m, 5H), 5.38 – 5.34 (m, 1H), 5.30 – 5.25 (m, 1H), 3.68 (q,  $J$  = 7.1 Hz, 1H), 2.47 (d,  $J$  = 7.2 Hz, 2H), 1.95 (s, 3H), 1.90 – 1.81 (m, 1H), 1.57 (d,  $J$  = 7.2 Hz, 3H), 0.91 (d,  $J$  = 6.6 Hz, 6H).

**<sup>13</sup>C NMR (101 MHz, CDCl<sub>3</sub>):**  $\delta$  172.7, 141.1, 137.8, 137.8, 129.8, 128.8, 127.3, 127.2, 126.6, 123.8, 122.5, 122.1, 119.5, 90.7, 87.8, 47.6, 45.0, 30.1, 23.4, 22.3, 18.4.

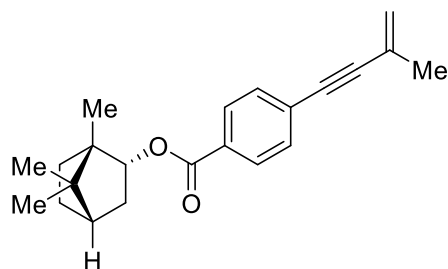

**(1S,2R,4S)-1,7,7-trimethylbicyclo[2.2.1]heptan-2-yl 4-(3-methylbut-3-en-1-yn-1-yl)benzoate**

**<sup>1</sup>H NMR (400 MHz, CDCl<sub>3</sub>):**  $\delta$  8.00 (d,  $J$  = 8.4 Hz, 2H), 7.50 (d,  $J$  = 8.4 Hz, 2H), 5.45 (s, 1H), 5.36 (s, 1H), 5.15 – 5.07 (m, 1H), 2.55 – 2.41 (m, 1H), 2.18 – 2.07 (m, 1H), 2.01 (s, 3H), 1.86 – 1.77 (m, 1H), 1.74 (t,  $J$  = 4.5 Hz, 1H), 1.46 – 1.36 (m, 1H), 1.36 – 1.27 (m, 1H), 1.12 (dd,  $J$  = 13.8, 3.5 Hz, 1H), 0.97 (s, 3H), 0.91 (s, 6H).

**<sup>13</sup>C NMR (101 MHz, CDCl<sub>3</sub>):**  $\delta$  166.2, 131.4, 130.0, 129.3, 127.8, 126.5, 123.0, 93.3, 87.6, 80.7, 49.1, 47.9, 44.9, 36.8, 28.1, 27.4, 23.3, 19.7, 18.9, 13.6.

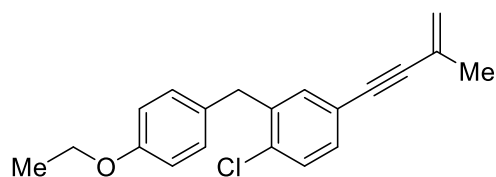

**1-chloro-2-(4-ethoxybenzyl)-4-(3-methylbut-3-en-1-yn-1-yl)benzene**

**<sup>1</sup>H NMR (400 MHz, CDCl<sub>3</sub>):** δ 7.32 – 7.27 (m, 1H), 7.25 – 7.19 (m, 2H), 7.09 (d, *J* = 8.7 Hz, 2H), 6.82 (d, *J* = 8.6 Hz, 2H), 5.39 – 5.35 (m, 1H), 5.30 – 5.27 (m, 1H), 4.04 – 3.96 (m, 4H), 1.95 (s, 3H), 1.39 (t, *J* = 7.0 Hz, 3H).

**<sup>13</sup>C NMR (101 MHz, CDCl<sub>3</sub>):** δ 157.5, 139.3, 134.2, 133.8, 130.8, 130.6, 129.9, 129.5, 126.6, 122.3, 122.0, 114.5, 91.2, 87.4, 63.4, 38.2, 23.4, 14.9.

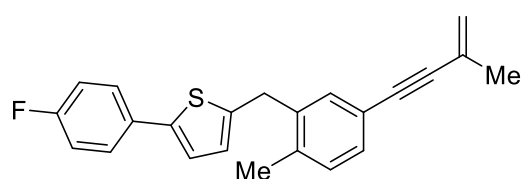

**2-(4-fluorophenyl)-5-(2-methyl-5-(3-methylbut-3-en-1-yn-1-yl)benzyl)thiophene**

**<sup>1</sup>H NMR (400 MHz, CDCl<sub>3</sub>):** δ 7.48 – 7.43 (m, 2H), 7.31 (s, 1H), 7.26 (dd, *J* = 7.8, 1.8 Hz, 1H), 7.11 (d, *J* = 7.8 Hz, 1H), 7.04 – 6.98 (m, 3H), 6.65 (d, *J* = 3.6 Hz, 1H), 5.39 – 5.35 (m, 1H), 5.28 – 5.25 (m, 1H), 4.07 (s, 2H), 2.30 (s, 3H), 1.97 (s, 3H).

**<sup>13</sup>C NMR (101 MHz, CDCl<sub>3</sub>):** δ 162.0 (d, *J* = 247.7 Hz), 142.8, 141.6, 138.2, 136.8, 132.5, 130.7 (d, *J* = 3.4 Hz), 130.5, 130.1, 127.1 (d, *J* = 7.9 Hz), 126.9, 126.0, 122.6, 121.7, 121.0, 115.7 (d, *J* = 22.0 Hz), 90.1, 88.4, 33.9, 23.5, 19.4.

**<sup>19</sup>F NMR (376 MHz, CDCl<sub>3</sub>):** δ -115.08.

## 4.2 Characterization of products

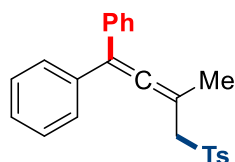

**(3-methyl-4-tosylbuta-1,2-diene-1,1-diyl)dibenzene (4)**

Colorless oil, 27.5 mg, 73% yield. (PE/EtOAc = 20/1)

**<sup>1</sup>H NMR (400 MHz, CDCl<sub>3</sub>):** δ 7.67 (d, *J* = 8.4 Hz, 2H), 7.30 – 7.23 (m, 6H), 7.14 – 7.04 (m, 4H), 3.92 (s, 2H), 2.32 (s, 3H), 2.06 (s, 3H).

**<sup>13</sup>C NMR (101 MHz, CDCl<sub>3</sub>):** δ 207.5, 144.3, 136.1, 135.3, 129.6, 128.5, 128.2, 128.1, 127.4, 110.1, 92.8, 61.4, 21.6, 19.2.

**HRMS (m/z, ESI-TOF):** Calcd for C<sub>24</sub>H<sub>22</sub>SO<sub>2</sub>Na<sup>+</sup> [M+Na<sup>+</sup>] 397.1233, found 397.1241.

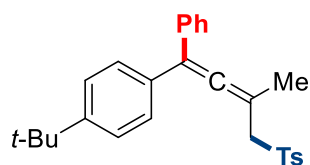

**1-(tert-butyl)-4-(3-methyl-1-phenyl-4-tosylbuta-1,2-dien-1-yl)benzene (5)**

Colorless oil, 30.5mg, **71%** yield. (PE/EtOAc = 20/1)

**<sup>1</sup>H NMR (400 MHz, CDCl<sub>3</sub>):** δ 7.69 (d, *J* = 8.0 Hz, 2H), 7.30 (d, *J* = 8.2 Hz, 2H), 7.28 – 7.22 (m, 3H), 7.15 – 7.02 (m, 6H), 3.91 (s, 2H), 2.34 (s, 3H), 2.05 (s, 3H), 1.33 (s, 9H).

**<sup>13</sup>C NMR (101 MHz, CDCl<sub>3</sub>):** δ 207.5, 150.4, 144.3, 136.3, 135.5, 133.0, 129.6, 128.7, 128.2, 128.1, 127.3, 125.1, 109.9, 92.6, 61.6, 34.5, 31.3, 21.6, 19.3.

**HRMS (m/z, ESI-TOF):** Calcd for C<sub>28</sub>H<sub>30</sub>SO<sub>2</sub>Na<sup>+</sup> [M+Na<sup>+</sup>] 453.1859, found 453.1852.

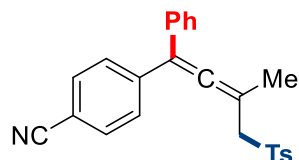

#### 4-(3-methyl-1-phenyl-4-tosylbuta-1,2-dien-1-yl)benzonitrile (6)

Colorless oil, 29.5mg, **74%** yield. (PE/EtOAc = 10/1)

**<sup>1</sup>H NMR (400 MHz, CDCl<sub>3</sub>):** δ 7.70 (d, *J* = 7.9 Hz, 2H), 7.55 (d, *J* = 8.1 Hz, 2H), 7.37 – 7.24 (m, 5H), 7.20 – 7.05 (m, 4H), 3.93 (d, *J* = 4.9 Hz, 2H), 2.36 (s, 3H), 2.06 (s, 3H).

**<sup>13</sup>C NMR (101 MHz, CDCl<sub>3</sub>):** δ 207.9, 144.5, 141.2, 135.4, 134.8, 131.9, 129.6, 128.9, 128.5, 128.4, 127.9, 127.8, 118.7, 110.6, 109.2, 93.9, 60.8, 21.5, 19.0.

**HRMS (m/z, ESI-TOF):** Calcd for C<sub>25</sub>H<sub>21</sub>NSO<sub>2</sub>Na<sup>+</sup> [M+Na<sup>+</sup>] 422.1185, found 422.1184.

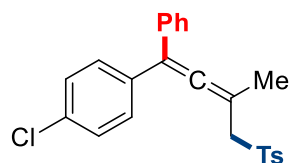

#### 1-chloro-4-(3-methyl-1-phenyl-4-tosylbuta-1,2-dien-1-yl)benzene (7)

Colorless oil, 28.5mg, **70%** yield. (PE/EtOAc = 20/1)

**<sup>1</sup>H NMR (400 MHz, CDCl<sub>3</sub>):** δ 7.67 (d, *J* = 7.9 Hz, 2H), 7.33 – 7.25 (m, 3H), 7.22 (d, *J* = 8.4 Hz, 2H), 7.14 – 7.07 (m, 4H), 7.04 (d, *J* = 8.2 Hz, 2H), 3.98 – 3.86 (m, 2H), 2.34 (s, 3H), 2.05 (s, 3H).

**<sup>13</sup>C NMR (101 MHz, CDCl<sub>3</sub>):** δ 207.4, 144.5, 135.7, 135.3, 134.7, 133.1, 129.8, 129.6, 128.4, 128.3, 128.3, 128.0, 127.6, 109.2, 93.2, 61.3, 21.6, 19.1.

**HRMS (m/z, ESI-TOF):** Calcd for C<sub>24</sub>H<sub>21</sub>ClSO<sub>2</sub>Na<sup>+</sup> [M+Na<sup>+</sup>] 431.0843, found 431.0848.

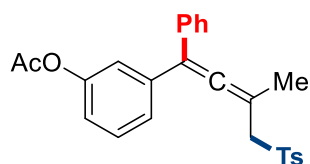

#### 3-(3-methyl-1-phenyl-4-tosylbuta-1,2-dien-1-yl)phenyl acetate (8)

Colorless oil, 29.7mg, **69%** yield. (PE/EtOAc = 20/1)

**<sup>1</sup>H NMR (400 MHz, CDCl<sub>3</sub>):** δ 7.66 (d, *J* = 8.0 Hz, 2H), 7.31 – 7.23 (m, 4H), 7.15 – 7.05 (m, 4H), 6.99 (dt, *J* = 7.8, 2.2 Hz, 2H), 6.91 (t, *J* = 2.0 Hz, 1H), 3.92 (s, 2H), 2.31 (s, 3H), 2.26 (s, 3H), 2.04 (s, 3H).

**<sup>13</sup>C NMR (101 MHz, CDCl<sub>3</sub>):** δ 207.4, 169.2, 150.5, 144.3, 137.8, 135.6, 135.2, 129.5, 129.0, 128.5, 128.2, 127.9, 127.4, 125.9, 121.5, 120.6, 109.4, 93.1, 61.2, 21.5, 21.0, 19.1.

**HRMS (m/z, ESI-TOF):** Calcd for C<sub>26</sub>H<sub>24</sub>SO<sub>4</sub>Na<sup>+</sup> [M+Na<sup>+</sup>] 455.1288, found 455.1288.

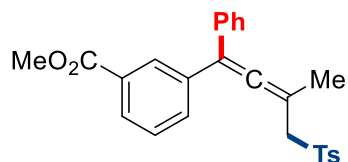

**methyl 3-(3-methyl-1-phenyl-4-tosylbuta-1,2-dien-1-yl)benzoate (9)**

Colorless oil, 32.4mg, 75% yield. (PE/EtOAc = 20/1)

<sup>1</sup>H NMR (400 MHz, CDCl<sub>3</sub>): δ 7.95 (d, *J* = 6.4 Hz, 1H), 7.83 (s, 1H), 7.67 (d, *J* = 7.9 Hz, 2H), 7.40 – 7.32 (m, 2H), 7.32 – 7.22 (m, 3H), 7.15 – 7.01 (m, 4H), 3.95 (s, 2H), 3.89 (s, 3H), 2.28 (s, 3H), 2.06 (s, 3H).

<sup>13</sup>C NMR (101 MHz, CDCl<sub>3</sub>): δ 207.5, 166.7, 144.3, 136.7, 135.6, 135.2, 133.0, 130.2, 129.5, 129.4, 128.4, 128.3, 127.9, 127.5, 109.4, 93.2, 61.2, 52.0, 21.5, 19.1.

HRMS (m/z, ESI-TOF): Calcd for C<sub>26</sub>H<sub>24</sub>SO<sub>4</sub>Na<sup>+</sup> [M+Na<sup>+</sup>] 455.1288, found 455.1289.

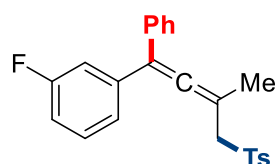

**1-fluoro-3-(3-methyl-1-phenyl-4-tosylbuta-1,2-dien-1-yl)benzene (10)**

Colorless oil, 30.0mg, 76% yield. (PE/EtOAc = 20/1)

<sup>1</sup>H NMR (400 MHz, CDCl<sub>3</sub>): δ 7.68 (d, *J* = 7.9 Hz, 2H), 7.33 – 7.17 (m, 4H), 7.16 – 7.05 (m, 4H), 7.00 – 6.87 (m, 2H), 6.80 (d, *J* = 10.0 Hz, 1H), 3.93 (d, *J* = 2.7 Hz, 2H), 2.32 (s, 3H), 2.06 (s, 3H).

<sup>13</sup>C NMR (101 MHz, CDCl<sub>3</sub>): δ 207.4, 162.6 (d, *J* = 246.5 Hz), 144.5, 138.6 (d, *J* = 7.5 Hz), 135.4 (d, *J* = 32.2 Hz), 129.6, 129.6, 129.6, 128.5, 128.3, 128.0, 127.6, 124.2 (d, *J* = 2.9 Hz), 115.3 (d, *J* = 22.2 Hz), 114.2 (d, *J* = 21.4 Hz), 109.3 (d, *J* = 2.4 Hz), 93.3, 61.2, 21.5, 19.1.

<sup>19</sup>F NMR (376 MHz, CDCl<sub>3</sub>): δ -112.99.

HRMS (m/z, ESI-TOF): Calcd for C<sub>24</sub>H<sub>21</sub>FSO<sub>2</sub>Na<sup>+</sup> [M+Na<sup>+</sup>] 415.1138, found 415.1154.

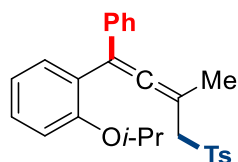

**1-isopropoxy-2-(3-methyl-1-phenyl-4-tosylbuta-1,2-dien-1-yl)benzene (11)**

Colorless oil, 24.0mg, 55% yield. (PE/EtOAc = 20/1)

<sup>1</sup>H NMR (400 MHz, CDCl<sub>3</sub>): δ 7.65 (d, *J* = 8.1 Hz, 2H), 7.25 (td, *J* = 7.6, 7.1, 1.9 Hz, 1H), 7.19 – 7.13 (m, 3H), 7.02 (d, *J* = 8.1 Hz, 2H), 6.99 – 6.91 (m, 3H), 6.86 (dd, *J* = 8.0, 4.9 Hz, 2H), 4.43 – 4.33 (m, 1H), 3.97 (d, *J* = 13.9 Hz, 1H), 3.87 (d, *J* = 13.9 Hz, 1H), 2.29 (s, 3H), 2.03 (s, 3H), 1.06 (dd, *J* = 6.0, 2.3 Hz, 6H).

<sup>13</sup>C NMR (101 MHz, CDCl<sub>3</sub>): δ 207.4, 155.3, 144.1, 136.9, 135.2, 131.4, 129.5, 128.7, 128.0, 127.8, 127.2, 126.6, 126.2, 120.2, 113.8, 106.1, 91.5, 70.1, 61.6, 21.9, 21.8, 21.6, 18.8.

HRMS (m/z, ESI-TOF): Calcd for C<sub>27</sub>H<sub>28</sub>SO<sub>3</sub>Na<sup>+</sup> [M+Na<sup>+</sup>] 455.1651, found 455.1663.

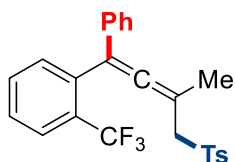

**1-(3-methyl-1-phenyl-4-tosylbuta-1,2-dien-1-yl)-2-(trifluoromethyl)benzene (12)**

Colorless oil, 19.7mg, **45%** yield. (PE/EtOAc = 20/1)

**<sup>1</sup>H NMR (400 MHz, CDCl<sub>3</sub>):** δ 7.69 (d, *J* = 7.6 Hz, 1H), 7.64 (d, *J* = 8.2 Hz, 2H), 7.53 – 7.41 (m, 2H), 7.22 – 7.12 (m, 4H), 7.05 (d, *J* = 7.9 Hz, 2H), 6.91 – 6.81 (m, 2H), 3.95 (d, *J* = 13.9 Hz, 1H), 3.83 (d, *J* = 13.9 Hz, 1H), 2.30 (s, 3H), 2.01 (s, 3H).

**<sup>13</sup>C NMR (101 MHz, CDCl<sub>3</sub>):** δ 205.4, 144.3, 136.1, 135.1, 134.6 (q, *J* = 2.0 Hz), 132.2, 131.6, 129.5, 129.0 (q, *J* = 30.3 Hz), 128.1, 128.1, 127.7, 127.1, 126.9, 126.2 (q, *J* = 5.1 Hz), 123.8 (q, *J* = 275.2 Hz), 106.0, 93.9, 61.1, 21.6, 18.5.

**<sup>19</sup>F NMR (376 MHz, CDCl<sub>3</sub>):** δ -59.29.

**HRMS (m/z, ESI-TOF):** Calcd for C<sub>25</sub>H<sub>21</sub>F<sub>3</sub>SO<sub>2</sub>Na<sup>+</sup> [M+Na<sup>+</sup>] 465.1107, found 465.1120.

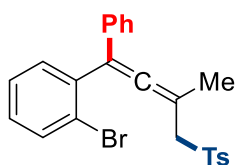

**1-bromo-2-(3-methyl-1-phenyl-4-tosylbuta-1,2-dien-1-yl)benzene (13)**

Colorless oil, 27.6mg, **61%** yield. (PE/EtOAc = 20/1)

**<sup>1</sup>H NMR (400 MHz, CDCl<sub>3</sub>):** δ 7.65 (d, *J* = 7.9 Hz, 2H), 7.56 (d, *J* = 7.9 Hz, 1H), 7.30 – 7.23 (m, 1H), 7.23 – 7.14 (m, 4H), 7.10 (d, *J* = 7.4 Hz, 1H), 7.04 (d, *J* = 8.0 Hz, 2H), 6.96 – 6.86 (m, 2H), 4.02 (d, *J* = 13.9 Hz, 1H), 3.88 (d, *J* = 13.9 Hz, 1H), 2.29 (s, 3H), 2.07 (s, 3H).

**<sup>13</sup>C NMR (101 MHz, CDCl<sub>3</sub>):** δ 206.2, 144.2, 136.8, 135.3, 134.9, 132.8, 131.6, 129.5, 129.0, 128.2, 128.0, 127.2, 127.1, 126.9, 124.0, 108.3, 93.7, 60.9, 21.6, 18.4.

**HRMS (m/z, ESI-TOF):** Calcd for C<sub>24</sub>H<sub>21</sub>BrSO<sub>2</sub>Na<sup>+</sup> [M+Na<sup>+</sup>] 475.0338, found 475.0358.

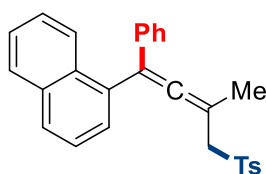

**1-(3-methyl-1-phenyl-4-tosylbuta-1,2-dien-1-yl)naphthalene (14)**

Colorless oil, 22.4mg, **53%** yield. (PE/EtOAc = 20/1)

**<sup>1</sup>H NMR (400 MHz, CDCl<sub>3</sub>):** δ 7.83 (dd, *J* = 11.7, 8.2 Hz, 2H), 7.60 (d, *J* = 8.5 Hz, 1H), 7.54 (d, *J* = 8.3 Hz, 2H), 7.47 – 7.39 (m, 2H), 7.33 – 7.27 (m, 1H), 7.23 (dd, *J* = 7.2, 1.3 Hz, 1H), 7.19 – 7.11 (m, 3H), 7.01 – 6.93 (m, 2H), 6.80 (d, *J* = 8.0 Hz, 2H), 3.98 – 3.85 (m, 2H), 2.15 (s, 3H), 2.08 (s, 3H).

**<sup>13</sup>C NMR (101 MHz, CDCl<sub>3</sub>):** δ 207.0, 144.1, 136.4, 134.9, 133.6, 133.5, 131.7, 129.2, 128.3, 128.2, 128.0, 127.9, 127.5, 127.1, 127.1, 125.9, 125.8, 125.8, 125.4, 107.3, 92.5, 61.5, 21.5, 18.8.

**HRMS (m/z, ESI-TOF):** Calcd for C<sub>28</sub>H<sub>24</sub>SO<sub>2</sub>Na<sup>+</sup> [M+Na<sup>+</sup>] 447.1389, found 447.1405.

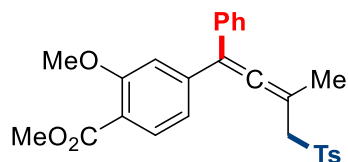

**methyl 2-methoxy-4-(3-methyl-1-phenyl-4-tosylbuta-1,2-dien-1-yl)benzoate (15)**

Colorless oil, 34.3mg, **74%** yield. (PE/EtOAc = 15/1)

<sup>1</sup>H NMR (400 MHz, CDCl<sub>3</sub>): δ 7.77 – 7.64 (m, 3H), 7.35 – 7.24 (m, 3H), 7.20 – 7.09 (m, 4H), 6.99 (s, 1H), 6.72 (d, *J* = 8.0 Hz, 1H), 4.02 – 3.81 (m, 8H), 2.34 (s, 3H), 2.05 (s, 3H).

<sup>13</sup>C NMR (101 MHz, CDCl<sub>3</sub>): δ 207.7, 166.2, 159.1, 144.5, 141.8, 135.4, 135.4, 131.4, 129.6, 128.4, 128.3, 127.9, 127.6, 120.2, 118.6, 112.2, 109.7, 93.2, 61.0, 56.0, 51.9, 21.4, 19.1.

HRMS (m/z, ESI-TOF): Calcd for C<sub>27</sub>H<sub>26</sub>SO<sub>5</sub>Na<sup>+</sup> [M+Na<sup>+</sup>] 485.1393, found 485.1400.

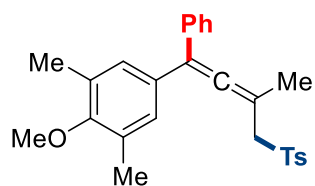

**2-methoxy-1,3-dimethyl-5-(3-methyl-1-phenyl-4-tosylbuta-1,2-dien-1-yl)benzene (16)**

Colorless oil, 17.3mg, **40%** yield. (PE/EtOAc = 20/1)

<sup>1</sup>H NMR (400 MHz, CDCl<sub>3</sub>): δ 7.67 (d, *J* = 7.9 Hz, 2H), 7.31 – 7.23 (m, 3H), 7.13 – 7.01 (m, 4H), 6.84 (s, 2H), 3.92 (d, *J* = 3.4 Hz, 2H), 3.73 (s, 3H), 2.31 (s, 3H), 2.25 (s, 6H), 2.03 (s, 3H).

<sup>13</sup>C NMR (101 MHz, CDCl<sub>3</sub>): δ 207.4, 156.4, 144.3, 136.4, 135.4, 131.4, 130.6, 129.5, 129.0, 128.6, 128.1, 128.0, 127.2, 109.8, 92.2, 61.6, 59.6, 21.6, 19.4, 16.1.

HRMS (m/z, ESI-TOF): Calcd for C<sub>27</sub>H<sub>28</sub>SO<sub>3</sub>Na<sup>+</sup> [M+Na<sup>+</sup>] 455.1651, found 455.1657.

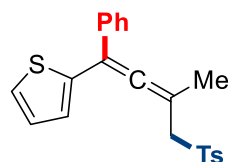

**2-(3-methyl-1-phenyl-4-tosylbuta-1,2-dien-1-yl)thiophene (17)**

Colorless oil, 18.5mg, **49%** yield. (PE/EtOAc = 10/1)

<sup>1</sup>H NMR (400 MHz, CDCl<sub>3</sub>): δ 7.67 (d, *J* = 8.1 Hz, 2H), 7.32 – 7.26 (m, 3H), 7.24 – 7.18 (m, 3H), 7.08 (d, *J* = 7.9 Hz, 2H), 6.94 (dd, *J* = 5.1, 3.6 Hz, 1H), 6.79 (dd, *J* = 3.6, 1.2 Hz, 1H), 3.97 – 3.85 (m, 2H), 2.33 (s, 3H), 2.05 (s, 3H).

<sup>13</sup>C NMR (101 MHz, CDCl<sub>3</sub>): δ 207.0, 144.4, 139.4, 135.7, 135.3, 129.6, 128.3, 128.2, 128.1, 127.8, 127.3, 126.4, 125.4, 104.9, 93.4, 61.3, 21.6, 19.2.

HRMS (m/z, ESI-TOF): Calcd for C<sub>22</sub>H<sub>20</sub>S<sub>2</sub>O<sub>2</sub>Na<sup>+</sup> [M+Na<sup>+</sup>] 403.0797, found 403.0802.

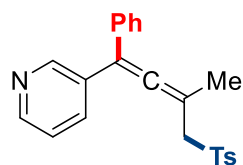

**3-(3-methyl-1-phenyl-4-tosylbuta-1,2-dien-1-yl)pyridine (18)**

Colorless oil, 23.0mg, **61%** yield. (PE/EtOAc = 5/1)

**<sup>1</sup>H NMR (400 MHz, CDCl<sub>3</sub>):** δ 8.52 (dd, *J* = 4.8, 1.6 Hz, 1H), 8.38 (d, *J* = 2.3 Hz, 1H), 7.68 (d, *J* = 8.0 Hz, 2H), 7.47 (dt, *J* = 8.0, 2.0 Hz, 1H), 7.32 – 7.27 (m, 3H), 7.22 (dd, *J* = 7.9, 4.8 Hz, 1H), 7.16 – 7.06 (m, 4H), 3.93 (d, *J* = 1.6 Hz, 2H), 2.33 (s, 3H), 2.06 (s, 3H).

**<sup>13</sup>C NMR (101 MHz, CDCl<sub>3</sub>):** δ 207.5, 149.3, 148.1, 144.5, 135.8, 135.1, 134.9, 132.2, 129.6, 128.4, 128.2, 127.9, 127.7, 123.1, 107.2, 93.7, 61.0, 21.6, 19.1.

**HRMS (m/z, ESI-TOF):** Calcd for C<sub>23</sub>H<sub>21</sub>NSO<sub>2</sub>H<sup>+</sup> [M+H<sup>+</sup>] 376.1366, found 376.1375.

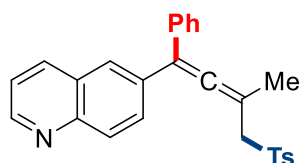

**6-(3-methyl-1-phenyl-4-tosylbuta-1,2-dien-1-yl)quinolone (19)**

Colorless oil, 32.5mg, **76%** yield. (PE/EtOAc = 3/1)

**<sup>1</sup>H NMR (400 MHz, CDCl<sub>3</sub>):** δ 8.89 (dd, *J* = 4.1, 1.9 Hz, 1H), 8.06 (d, *J* = 8.3 Hz, 1H), 8.00 (d, *J* = 8.8 Hz, 1H), 7.67 (d, *J* = 7.9 Hz, 2H), 7.59 (d, *J* = 2.0 Hz, 1H), 7.48 (dd, *J* = 8.8, 2.0 Hz, 1H), 7.42 – 7.36 (m, 1H), 7.35 – 7.29 (m, 3H), 7.23 – 7.14 (m, 2H), 6.98 (d, *J* = 7.9 Hz, 2H), 4.07 – 3.91 (m, 2H), 2.16 (s, 3H), 2.11 (s, 3H).

**<sup>13</sup>C NMR (101 MHz, CDCl<sub>3</sub>):** δ 208.0, 150.3, 147.5, 144.4, 135.9, 135.7, 135.1, 134.4, 130.1, 129.5, 129.2, 128.5, 128.3, 128.0, 127.9, 127.6, 127.0, 121.3, 109.7, 93.3, 61.2, 21.3, 19.1.

**HRMS (m/z, ESI-TOF):** Calcd for C<sub>33</sub>H<sub>27</sub>NSO<sub>3</sub>Na<sup>+</sup> [M+Na<sup>+</sup>] 540.1604, found 540.1616.

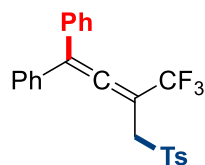

**(4,4,4-trifluoro-3-(tosylmethyl)buta-1,2-diene-1,1-diyl)dibenzene (20)**

Colorless oil, 21.4mg, **50%** yield. (PE/EtOAc = 20/1)

**<sup>1</sup>H NMR (400 MHz, CDCl<sub>3</sub>):** δ 7.60 (d, *J* = 8.0 Hz, 2H), 7.42 – 7.33 (m, 6H), 7.33 – 7.25 (m, 4H), 7.08 (d, *J* = 8.0 Hz, 2H), 4.06 (s, 2H), 2.32 (s, 3H).

**<sup>13</sup>C NMR (101 MHz, CDCl<sub>3</sub>):** δ 208.3 (q, *J* = 3.6 Hz), 144.9, 134.8, 133.4, 129.7, 128.9, 128.6, 128.3, 122.4 (q, *J* = 276.2 Hz), 118.9, 91.6 (q, *J* = 37.2 Hz), 54.1, 21.6.

**<sup>19</sup>F NMR (376 MHz, CDCl<sub>3</sub>):** δ -62.35.

**HRMS (m/z, ESI-TOF):** Calcd for C<sub>24</sub>H<sub>19</sub>F<sub>3</sub>SO<sub>2</sub>Na<sup>+</sup> [M+Na<sup>+</sup>] 451.0950, found 451.0945.

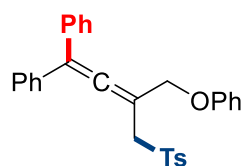

**(4-phenoxy-3-(tosylmethyl)buta-1,2-diene-1,1-diyl)dibenzene (21)**

Colorless oil, 33.5mg, **72%** yield. (PE/EtOAc = 20/1)

**<sup>1</sup>H NMR (400 MHz, CDCl<sub>3</sub>):** δ 7.64 (d, *J* = 8.1 Hz, 2H), 7.31 – 7.22 (m, 6H), 7.17 – 7.08 (m, 6H), 7.00 (d, *J* = 8.0 Hz, 2H), 6.90 – 6.79 (m, 3H), 4.81 (s, 2H), 4.05 (s, 2H), 2.26 (s, 3H).

**<sup>13</sup>C NMR (101 MHz, CDCl<sub>3</sub>):** δ 207.6, 157.8, 144.4, 135.2, 135.0, 129.6, 129.3, 128.7, 128.2, 128.0, 127.7, 121.1, 115.0, 113.1, 94.2, 67.5, 56.6, 21.5.

**HRMS (m/z, ESI-TOF):** Calcd for C<sub>30</sub>H<sub>26</sub>SO<sub>3</sub>Na<sup>+</sup> [M+Na<sup>+</sup>] 489.1495, found 489.1515.

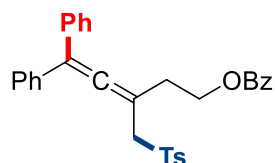

### 5,5-diphenyl-3-(tosylmethyl)penta-3,4-dien-1-yl benzoate (22)

Colorless oil, 32.8mg, **64%** yield. (PE/EtOAc = 20/1)

**<sup>1</sup>H NMR (400 MHz, CDCl<sub>3</sub>):** δ 7.80 (d, *J* = 6.8 Hz, 2H), 7.66 (d, *J* = 8.3 Hz, 2H), 7.48 (t, *J* = 7.4 Hz, 1H), 7.30 (t, *J* = 7.8 Hz, 2H), 7.22 – 7.12 (m, 6H), 7.12 – 7.06 (m, 4H), 7.02 (d, *J* = 8.1 Hz, 2H), 4.52 (t, *J* = 6.0 Hz, 2H), 4.03 (s, 2H), 2.89 (t, *J* = 6.0 Hz, 2H), 2.28 (s, 3H).

**<sup>13</sup>C NMR (101 MHz, CDCl<sub>3</sub>):** δ 206.9, 166.3, 144.4, 135.5, 135.1, 132.6, 129.8, 129.6, 129.4, 128.4, 128.1, 128.1, 127.9, 127.4, 112.3, 94.2, 62.2, 60.1, 31.6, 21.5.

**HRMS (m/z, ESI-TOF):** Calcd for C<sub>32</sub>H<sub>28</sub>SO<sub>4</sub>Na<sup>+</sup> [M+Na<sup>+</sup>] 531.1601, found 531.1598.

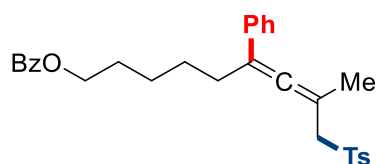

### 8-methyl-6-phenyl-9-tosylnona-6,7-dien-1-yl benzoate (23)

Colorless oil, 16.9mg, **35%** yield. (PE/EtOAc = 20/1)

**<sup>1</sup>H NMR (400 MHz, CDCl<sub>3</sub>):** δ 8.04 (d, *J* = 7.7 Hz, 2H), 7.76 (d, *J* = 7.9 Hz, 2H), 7.60 – 7.51 (m, 1H), 7.44 (t, *J* = 7.6 Hz, 2H), 7.29 – 7.18 (m, 5H), 7.14 (d, *J* = 7.5 Hz, 2H), 4.31 (t, *J* = 6.6 Hz, 2H), 3.83 (s, 2H), 2.39 (s, 3H), 2.34 – 2.24 (m, 1H), 2.24 – 2.14 (m, 1H), 1.95 (s, 3H), 1.82 – 1.71 (m, 2H), 1.49 – 1.39 (m, 4H).

**<sup>13</sup>C NMR (101 MHz, CDCl<sub>3</sub>):** δ 206.4, 166.6, 144.5, 135.9, 135.9, 132.9, 130.3, 129.7, 129.5, 128.3, 128.3, 128.2, 126.9, 126.3, 106.0, 92.1, 64.9, 61.7, 30.0, 28.5, 27.4, 25.8, 21.6, 19.0.

**HRMS (m/z, ESI-TOF):** Calcd for C<sub>30</sub>H<sub>32</sub>SO<sub>4</sub>Na<sup>+</sup> [M+Na<sup>+</sup>] 511.1914, found 511.1917.

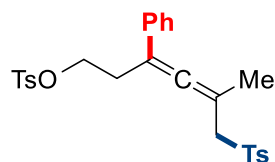

### 5-methyl-3-phenyl-6-tosylhexa-3,4-dien-1-yl 4-methylbenzenesulfonate (24)

Colorless oil, 12.5mg, **25%** yield. (PE/EtOAc = 15/1)

**<sup>1</sup>H NMR (400 MHz, CDCl<sub>3</sub>):** δ 7.76 (d, *J* = 8.0 Hz, 4H), 7.34 – 7.25 (m, 5H), 7.24 – 7.20 (m, 2H), 7.11 – 7.05 (m, 2H), 4.14 – 4.03 (m, 2H), 3.86 – 3.73 (m, 2H), 2.67 – 2.54 (m, 2H), 2.43 (d, *J* = 6.4 Hz, 6H), 1.91 (s, 3H).

**<sup>13</sup>C NMR (101 MHz, CDCl<sub>3</sub>):** δ 206.4, 144.8, 144.8, 135.8, 134.8, 132.8, 129.8, 129.8, 128.4, 128.2,



127.8, 127.3, 126.1, 101.4, 93.9, 68.2, 61.3, 29.7, 21.7, 21.6, 19.0.

**HRMS (m/z, ESI-TOF):** Calcd for  $C_{27}H_{28}S_2O_5Na^+$  [ $M+Na^+$ ] 519.1270, found 519.1261.

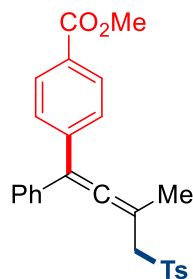

**methyl 4-(3-methyl-1-phenyl-4-tosylbuta-1,2-dien-1-yl)benzoate (25)**

Colorless oil, 35.9mg, **83%** yield. (PE/EtOAc = 20/1)

**$^1H$  NMR (400 MHz,  $CDCl_3$ ):**  $\delta$  7.93 (d,  $J = 8.5$  Hz, 2H), 7.68 (d,  $J = 8.2$  Hz, 2H), 7.32 – 7.27 (m, 3H), 7.16 (d,  $J = 8.4$  Hz, 2H), 7.14 – 7.07 (m, 4H), 3.95 (d,  $J = 3.1$  Hz, 2H), 3.92 (s, 3H), 2.33 (s, 3H), 2.07 (s, 3H).

**$^{13}C$  NMR (101 MHz,  $CDCl_3$ ):**  $\delta$  207.8, 166.6, 144.5, 141.0, 135.4, 135.2, 129.6, 129.4, 128.8, 128.3, 128.0, 127.6, 109.6, 93.4, 61.1, 52.0, 21.5, 18.9.

**HRMS (m/z, ESI-TOF):** Calcd for  $C_{26}H_{24}SO_4Na^+$  [ $M+Na^+$ ] 455.1288, found 455.1304.

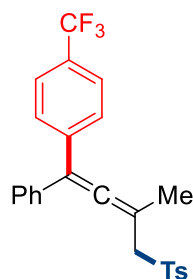

**1-methyl-4-((2-methyl-4-phenyl-4-(trifluoromethyl)phenyl)buta-2,3-dien-1-yl)sulfonylbenzene (26)**

Colorless oil, 28.3mg, **64%** yield. (PE/EtOAc = 20/1)

**$^1H$  NMR (400 MHz,  $CDCl_3$ ):**  $\delta$  7.69 (d,  $J = 8.0$  Hz, 2H), 7.52 (d,  $J = 8.1$  Hz, 2H), 7.34 – 7.27 (m, 3H), 7.24 (d,  $J = 7.9$  Hz, 2H), 7.16 – 7.05 (m, 4H), 4.02 – 3.86 (m, 2H), 2.33 (s, 3H), 2.07 (s, 3H).

**$^{13}C$  NMR (101 MHz,  $CDCl_3$ ):**  $\delta$  207.7, 144.6, 140.1 (q,  $J = 1.5$  Hz), 135.4, 135.4, 129.7, 129.3 (q,  $J = 32.4$  Hz), 128.8, 128.5, 128.4, 128.1, 127.8, 125.1 (q,  $J = 3.8$  Hz), 124.7 (q,  $J = 272.9$  Hz), 109.3, 93.6, 61.1, 21.5, 19.1.

**$^{19}F$  NMR (376 MHz,  $CDCl_3$ ):**  $\delta$  -62.40.

**HRMS (m/z, ESI-TOF):** Calcd for  $C_{25}H_{21}F_3SO_2Na^+$  [ $M+Na^+$ ] 465.1107, found 465.1093.

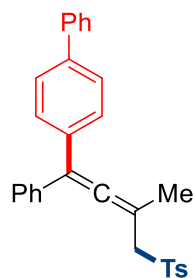

**4-(3-methyl-1-phenyl-4-tosylbuta-1,2-dien-1-yl)-1,1'-biphenyl (27)**

Colorless oil, 28.0mg, **62%** yield. (PE/EtOAc = 20/1)

**<sup>1</sup>H NMR (400 MHz, CDCl<sub>3</sub>):** δ 7.69 (d, *J* = 7.9 Hz, 2H), 7.59 (d, *J* = 7.0 Hz, 2H), 7.51 (d, *J* = 8.2 Hz, 2H), 7.44 (t, *J* = 7.5 Hz, 2H), 7.35 (d, *J* = 7.4 Hz, 1H), 7.33 – 7.25 (m, 3H), 7.23 – 7.13 (m, 4H), 7.08 (d, *J* = 8.0 Hz, 2H), 3.94 (s, 2H), 2.29 (s, 3H), 2.07 (s, 3H).

**<sup>13</sup>C NMR (101 MHz, CDCl<sub>3</sub>):** δ 207.6, 144.4, 140.5, 140.2, 136.1, 135.4, 135.1, 129.6, 128.9, 128.8, 128.6, 128.3, 128.1, 127.4, 127.4, 126.9, 126.8, 109.9, 92.9, 61.4, 21.6, 19.2.

**HRMS (m/z, ESI-TOF):** Calcd for C<sub>30</sub>H<sub>26</sub>SO<sub>2</sub>Na<sup>+</sup> [M+Na<sup>+</sup>] 473.1546, found 473.1569.

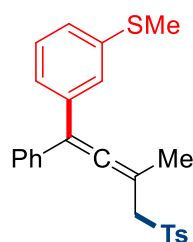

**methyl(3-(3-methyl-1-phenyl-4-tosylbuta-1,2-dien-1-yl)phenyl)sulfane (28)**

Colorless oil, 24.0mg, **57%** yield. (PE/EtOAc = 20/1)

**<sup>1</sup>H NMR (400 MHz, CDCl<sub>3</sub>):** δ 7.67 (d, *J* = 7.9 Hz, 2H), 7.31 – 7.23 (m, 3H), 7.22 – 7.05 (m, 7H), 6.88 (dt, *J* = 7.4, 1.7 Hz, 1H), 3.92 (d, *J* = 2.4 Hz, 2H), 2.45 (s, 3H), 2.32 (s, 3H), 2.04 (s, 3H).

**<sup>13</sup>C NMR (101 MHz, CDCl<sub>3</sub>):** δ 207.4, 144.4, 138.5, 136.9, 135.8, 135.3, 129.6, 128.6, 128.5, 128.2, 128.0, 127.4, 126.4, 125.3, 125.3, 109.8, 92.9, 61.3, 21.6, 19.2, 15.6.

**HRMS (m/z, ESI-TOF):** Calcd for C<sub>25</sub>H<sub>24</sub>S<sub>2</sub>O<sub>2</sub>Na<sup>+</sup> [M+Na<sup>+</sup>] 443.1110, found 443.1125.

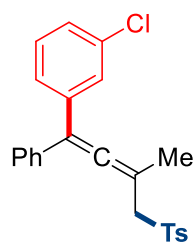

**1-chloro-3-(3-methyl-1-phenyl-4-tosylbuta-1,2-dien-1-yl)benzene (29)**

Colorless oil, 29.0mg, **71%** yield. (PE/EtOAc = 20/1)

**<sup>1</sup>H NMR (400 MHz, CDCl<sub>3</sub>):** δ 7.66 (d, *J* = 8.3 Hz, 2H), 7.31 – 7.26 (m, 3H), 7.25 – 7.17 (m, 2H), 7.14 – 7.06 (m, 5H), 7.02 (dt, *J* = 7.2, 1.6 Hz, 1H), 3.92 (d, *J* = 3.9 Hz, 2H), 2.31 (s, 3H), 2.05 (s, 3H).

**<sup>13</sup>C NMR (101 MHz, CDCl<sub>3</sub>):** δ 207.4, 144.4, 138.2, 135.5, 135.2, 134.1, 129.6, 129.4, 128.4, 128.4, 128.0, 127.6, 127.4, 126.8, 109.2, 93.4, 61.2, 21.6, 19.2.

**HRMS (m/z, ESI-TOF):** Calcd for C<sub>24</sub>H<sub>21</sub>ClSO<sub>2</sub>H<sup>+</sup> [M+H<sup>+</sup>] 409.1024, found 409.1023.

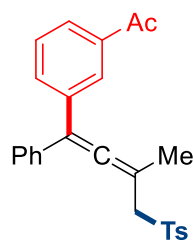

**1-(3-(3-methyl-1-phenyl-4-tosylbuta-1,2-dien-1-yl)phenyl)ethan-1-one (30)**

Colorless oil, 30.8mg, **74%** yield. (PE/EtOAc = 20/1)

**<sup>1</sup>H NMR (400 MHz, CDCl<sub>3</sub>):** δ 7.91 – 7.84 (m, 2H), 7.69 (d, *J* = 8.1 Hz, 2H), 7.42 – 7.35 (m, 2H), 7.33 – 7.27 (m, 3H), 7.16 – 7.08 (m, 4H), 3.93 (d, *J* = 5.4 Hz, 2H), 2.59 (s, 3H), 2.32 (s, 3H), 2.05 (s, 3H).  
**<sup>13</sup>C NMR (101 MHz, CDCl<sub>3</sub>):** δ 207.6, 198.0, 144.4, 137.2, 136.9, 135.6, 135.5, 133.1, 129.6, 128.5, 128.5, 128.4, 128.0, 127.6, 127.2, 109.6, 93.2, 61.2, 26.7, 21.5, 19.3.  
**HRMS (m/z, ESI-TOF):** Calcd for C<sub>26</sub>H<sub>24</sub>SO<sub>3</sub>Na<sup>+</sup> [M+Na<sup>+</sup>] 439.1338, found 439.1353.

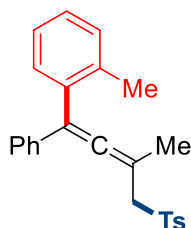

**1-methyl-2-(3-methyl-1-phenyl-4-tosylbuta-1,2-dien-1-yl)benzene (31)**

Colorless oil, 7.5mg, 19% yield. (PE/EtOAc = 20/1)

**<sup>1</sup>H NMR (400 MHz, CDCl<sub>3</sub>):** δ 7.63 (d, *J* = 8.3 Hz, 2H), 7.27 – 7.24 (m, 1H), 7.23 – 7.17 (m, 4H), 7.16 – 7.13 (m, 1H), 7.04 (d, *J* = 8.0 Hz, 2H), 6.99 (dd, *J* = 7.8, 1.4 Hz, 1H), 6.96 – 6.91 (m, 2H), 3.89 (d, *J* = 4.0 Hz, 2H), 2.33 (s, 3H), 2.04 (s, 3H), 1.98 (s, 3H).

**<sup>13</sup>C NMR (101 MHz, CDCl<sub>3</sub>):** δ 206.2, 144.3, 136.5, 136.1, 135.3, 135.1, 130.2, 130.1, 129.6, 128.3, 128.1, 127.7, 127.1, 127.0, 125.8, 108.1, 92.3, 61.6, 21.7, 20.0, 18.8.

**HRMS (m/z, ESI-TOF):** Calcd for C<sub>25</sub>H<sub>24</sub>SO<sub>2</sub>Na<sup>+</sup> [M+Na<sup>+</sup>] 411.1389, found 411.1395.

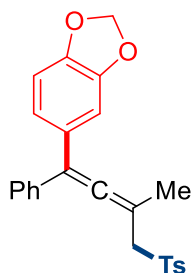

**5-(3-methyl-1-phenyl-4-tosylbuta-1,2-dien-1-yl)benzo[d][1,3]dioxole (32)**

Colorless oil, 26.3mg, 63% yield. (PE/EtOAc = 20/1)

**<sup>1</sup>H NMR (400 MHz, CDCl<sub>3</sub>):** δ 7.68 (d, *J* = 8.3 Hz, 2H), 7.29 – 7.24 (m, 3H), 7.15 – 7.06 (m, 4H), 6.71 (dd, *J* = 7.8, 0.8 Hz, 1H), 6.62 – 6.56 (m, 2H), 5.95 (q, *J* = 1.4 Hz, 2H), 3.91 (d, *J* = 1.2 Hz, 2H), 2.34 (s, 3H), 2.03 (s, 3H).

**<sup>13</sup>C NMR (101 MHz, CDCl<sub>3</sub>):** δ 207.2, 147.5, 147.0, 144.4, 136.3, 135.4, 130.0, 129.6, 128.6, 128.2, 128.1, 127.4, 122.2, 109.9, 108.9, 108.0, 101.1, 92.6, 61.5, 21.6, 19.2.

**HRMS (m/z, ESI-TOF):** Calcd for C<sub>25</sub>H<sub>22</sub>SO<sub>4</sub>Na<sup>+</sup> [M+Na<sup>+</sup>] 441.1131, found 441.1142.

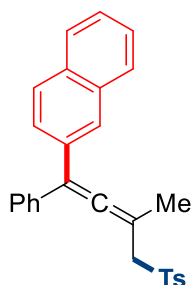

**2-(3-methyl-1-phenyl-4-tosylbuta-1,2-dien-1-yl)naphthalene (33)**

Colorless oil, 27.3mg, **64%** yield. (PE/EtOAc = 20/1)

**<sup>1</sup>H NMR (400 MHz, CDCl<sub>3</sub>):** δ 7.84 – 7.78 (m, 1H), 7.72 (d, *J* = 8.3 Hz, 2H), 7.65 (d, *J* = 7.9 Hz, 2H), 7.56 (s, 1H), 7.49 – 7.42 (m, 2H), 7.33 – 7.27 (m, 3H), 7.24 (dd, *J* = 8.5, 1.8 Hz, 1H), 7.17 (dd, *J* = 6.6, 3.0 Hz, 2H), 6.92 (d, *J* = 7.9 Hz, 2H), 3.96 (d, *J* = 4.3 Hz, 2H), 2.10 (d, *J* = 1.8 Hz, 6H).

**<sup>13</sup>C NMR (101 MHz, CDCl<sub>3</sub>):** δ 207.9, 144.3, 136.1, 135.2, 133.5, 133.2, 132.6, 129.5, 128.6, 128.3, 128.0, 127.8, 127.5, 127.5, 127.4, 126.7, 126.2, 126.0, 110.2, 92.9, 61.4, 21.3, 19.2.

**HRMS (m/z, ESI-TOF):** Calcd for C<sub>28</sub>H<sub>24</sub>SO<sub>2</sub>Na<sup>+</sup> [M+Na<sup>+</sup>] 447.1389, found 447.1395.

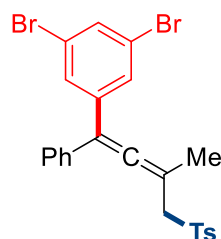**1,3-dibromo-5-(3-methyl-1-phenyl-4-tosylbuta-1,2-dien-1-yl)benzene (34)**

Colorless oil, 37.8mg, **71%** yield. (PE/EtOAc = 20/1)

**<sup>1</sup>H NMR (400 MHz, CDCl<sub>3</sub>):** δ 7.66 (d, *J* = 8.0 Hz, 2H), 7.55 (s, 1H), 7.34 – 7.27 (m, 3H), 7.24 (d, *J* = 1.8 Hz, 2H), 7.14 – 7.05 (m, 4H), 4.01 – 3.85 (m, 2H), 2.32 (s, 3H), 2.03 (s, 3H).

**<sup>13</sup>C NMR (101 MHz, CDCl<sub>3</sub>):** δ 207.4, 144.5, 140.2, 135.2, 134.9, 132.8, 130.1, 129.6, 128.5, 128.3, 127.9, 127.9, 122.7, 108.3, 94.0, 61.0, 21.6, 19.2.

**HRMS (m/z, ESI-TOF):** Calcd for C<sub>24</sub>H<sub>20</sub>Br<sub>2</sub>SO<sub>2</sub>Na<sup>+</sup> [M+Na<sup>+</sup>] 552.9443, found 552.9426.

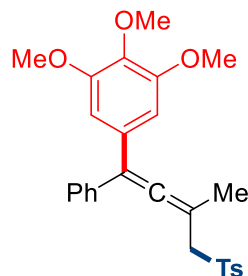**1,2,3-trimethoxy-5-(3-methyl-1-phenyl-4-tosylbuta-1,2-dien-1-yl)benzene (35)**

Colorless oil, 26.4mg, **57%** yield. (PE/EtOAc = 10/1)

**<sup>1</sup>H NMR (400 MHz, CDCl<sub>3</sub>):** δ 7.71 (d, *J* = 8.3 Hz, 2H), 7.33 – 7.26 (m, 3H), 7.19 (dd, *J* = 7.6, 2.0 Hz, 2H), 7.16 (d, *J* = 8.0 Hz, 2H), 6.57 (s, 2H), 3.97 – 3.91 (m, 2H), 3.88 (s, 3H), 3.81 (s, 6H), 2.36 (s, 3H), 2.01 (s, 3H).

**<sup>13</sup>C NMR (101 MHz, CDCl<sub>3</sub>):** δ 207.4, 153.0, 144.6, 137.4, 136.1, 135.9, 131.6, 129.6, 128.6, 128.2, 127.9, 127.5, 110.3, 105.9, 92.4, 61.5, 60.8, 56.1, 21.5, 19.5.

**HRMS (m/z, ESI-TOF):** Calcd for C<sub>27</sub>H<sub>28</sub>SO<sub>5</sub>Na<sup>+</sup> [M+Na<sup>+</sup>] 487.1550, found 487.1551.

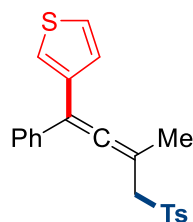

### 3-(3-methyl-1-phenyl-4-tosylbuta-1,2-dien-1-yl)thiophene (36)

Colorless oil, 25.2mg, **66%** yield. (PE/EtOAc = 20/1)

$^1\text{H NMR}$  (400 MHz,  $\text{CDCl}_3$ ):  $\delta$  7.70 (d,  $J$  = 8.4 Hz, 2H), 7.32 – 7.26 (m, 3H), 7.24 (dd,  $J$  = 5.0, 3.0 Hz, 1H), 7.21 – 7.17 (m, 2H), 7.14 (d,  $J$  = 8.0 Hz, 2H), 6.94 (dd,  $J$  = 3.0, 1.3 Hz, 1H), 6.90 (dt,  $J$  = 5.0, 1.1 Hz, 1H), 3.90 (d,  $J$  = 2.8 Hz, 2H), 2.36 (s, 3H), 2.04 (s, 3H).

$^{13}\text{C NMR}$  (101 MHz,  $\text{CDCl}_3$ ):  $\delta$  207.5, 144.5, 136.7, 136.1, 135.5, 129.7, 128.3, 128.2, 128.1, 127.9, 127.5, 125.3, 123.0, 105.5, 92.4, 61.5, 21.6, 19.2.

**HRMS** ( $m/z$ , ESI-TOF): Calcd for  $\text{C}_{22}\text{H}_{20}\text{S}_2\text{O}_2\text{H}^+$  [ $\text{M}+\text{H}^+$ ] 381.0977, found 381.0985.

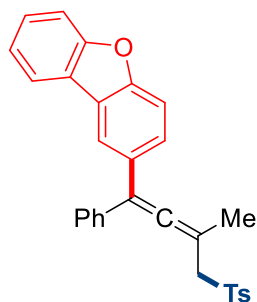

### 2-(3-methyl-1-phenyl-4-tosylbuta-1,2-dien-1-yl)dibenzo[b,d]furan (37)

Colorless oil, 29.4mg, **63%** yield. (PE/EtOAc = 15/1)

$^1\text{H NMR}$  (400 MHz,  $\text{CDCl}_3$ ):  $\delta$  7.89 (d,  $J$  = 7.6 Hz, 1H), 7.75 (s, 1H), 7.67 (d,  $J$  = 7.9 Hz, 2H), 7.56 (d,  $J$  = 8.2 Hz, 1H), 7.46 (d,  $J$  = 8.3 Hz, 2H), 7.36 – 7.26 (m, 4H), 7.24 – 7.15 (m, 3H), 6.98 (d,  $J$  = 7.9 Hz, 2H), 4.05 – 3.90 (m, 2H), 2.10 (d,  $J$  = 10.0 Hz, 6H).

$^{13}\text{C NMR}$  (101 MHz,  $\text{CDCl}_3$ ):  $\delta$  207.6, 156.5, 155.5, 144.3, 136.5, 135.4, 131.0, 129.5, 128.5, 128.3, 128.0, 127.5, 127.3, 124.3, 123.9, 122.8, 120.8, 120.7, 111.6, 111.3, 110.1, 92.7, 61.6, 21.3, 19.3.

**HRMS** ( $m/z$ , ESI-TOF): Calcd for  $\text{C}_{30}\text{H}_{24}\text{SO}_3\text{Na}^+$  [ $\text{M}+\text{Na}^+$ ] 487.1338, found 487.1340.

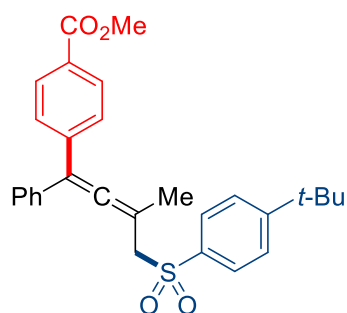

### methyl 4-(4-((tert-butyl)phenyl)sulfonyl)-3-methyl-1-phenylbuta-1,2-dien-1-yl)benzoate (38)

Colorless oil, 32.3mg, **68%** yield. (PE/EtOAc = 20/1)

$^1\text{H NMR}$  (400 MHz,  $\text{CDCl}_3$ ):  $\delta$  7.97 (d,  $J$  = 8.5 Hz, 2H), 7.76 (d,  $J$  = 8.5 Hz, 2H), 7.36 (d,  $J$  = 8.6 Hz, 2H), 7.34 – 7.28 (m, 5H), 7.25 – 7.21 (m, 2H), 3.94 (d,  $J$  = 3.0 Hz, 2H), 3.91 (s, 3H), 2.07 (s, 3H), 1.27 (s, 9H).

$^{13}\text{C NMR}$  (101 MHz,  $\text{CDCl}_3$ ):  $\delta$  207.9, 166.7, 157.5, 141.1, 135.9, 135.5, 129.6, 128.9, 128.6, 128.4, 127.9, 127.7, 126.0, 109.8, 93.3, 61.2, 52.0, 35.1, 30.9, 19.5.

**HRMS** ( $m/z$ , ESI-TOF): Calcd for  $\text{C}_{29}\text{H}_{30}\text{SO}_4\text{Na}^+$  [ $\text{M}+\text{Na}^+$ ] 497.1757, found 497.1753.

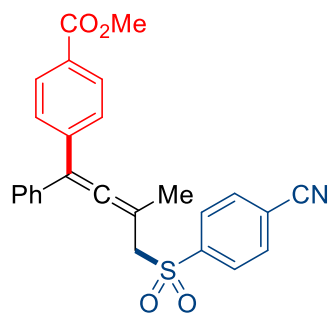

**methyl 4-((4-cyanophenyl)sulfonyl)-3-methyl-1-phenylbuta-1,2-dien-1-ylbenzoate (39)**

Colorless oil, 25.8mg, **58%** yield. (PE/EtOAc = 5/1)

**<sup>1</sup>H NMR (400 MHz, CDCl<sub>3</sub>):** δ 7.96 (d, *J* = 8.1 Hz, 2H), 7.83 (d, *J* = 8.1 Hz, 2H), 7.41 (d, *J* = 8.1 Hz, 2H), 7.38 – 7.30 (m, 3H), 7.14 (d, *J* = 8.1 Hz, 2H), 7.06 – 6.99 (m, 2H), 4.09 – 3.99 (m, 2H), 3.93 (s, 3H), 2.12 (s, 3H).

**<sup>13</sup>C NMR (101 MHz, CDCl<sub>3</sub>):** δ 207.8, 166.5, 141.7, 140.5, 135.1, 132.4, 129.6, 129.4, 128.6, 128.5, 128.5, 128.2, 128.2, 117.1, 116.9, 110.1, 92.8, 60.9, 52.1, 19.0.

**HRMS (m/z, ESI-TOF):** Calcd for C<sub>26</sub>H<sub>21</sub>NSO<sub>4</sub>Na<sup>+</sup> [*M*+Na<sup>+</sup>] 466.1083, found 466.1092.

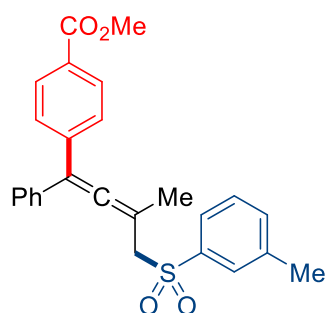

**methyl 4-(3-methyl-1-phenyl-4-(m-tolylsulfonyl)buta-1,2-dien-1-yl)benzoate (40)**

Colorless oil, 32.1mg, **74%** yield. (PE/EtOAc = 20/1)

**<sup>1</sup>H NMR (400 MHz, CDCl<sub>3</sub>):** δ 7.93 (d, *J* = 8.1 Hz, 2H), 7.68 – 7.60 (m, 2H), 7.33 – 7.26 (m, 4H), 7.24 (d, *J* = 7.6 Hz, 1H), 7.18 (d, *J* = 8.1 Hz, 2H), 7.14 – 7.07 (m, 2H), 3.96 (d, *J* = 3.1 Hz, 2H), 3.92 (s, 3H), 2.31 (s, 3H), 2.07 (s, 3H).

**<sup>13</sup>C NMR (101 MHz, CDCl<sub>3</sub>):** δ 207.9, 166.7, 141.0, 139.3, 138.3, 135.4, 134.4, 129.5, 128.9, 128.9, 128.4, 128.4, 128.3, 128.1, 127.6, 125.2, 109.6, 93.3, 61.1, 52.0, 21.1, 18.9.

**HRMS (m/z, ESI-TOF):** Calcd for C<sub>26</sub>H<sub>24</sub>SO<sub>4</sub>Na<sup>+</sup> [*M*+Na<sup>+</sup>] 455.1288, found 455.1289.

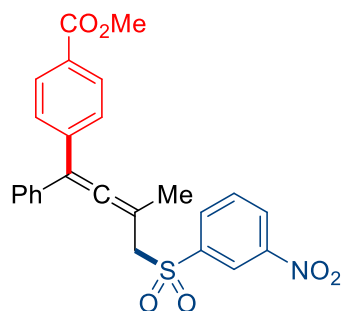

**methyl 4-(3-methyl-4-((3-nitrophenyl)sulfonyl)-1-phenylbuta-1,2-dien-1-yl)benzoate (41)**

Colorless oil, 18.7mg, **40%** yield. (PE/EtOAc = 10/1)

**<sup>1</sup>H NMR (400 MHz, CDCl<sub>3</sub>):** δ 8.59 (t, *J* = 2.0 Hz, 1H), 8.12 – 8.02 (m, 2H), 7.90 (d, *J* = 8.4 Hz, 2H), 7.37 (t, *J* = 8.0 Hz, 1H), 7.31 – 7.22 (m, 3H), 7.11 (d, *J* = 8.5 Hz, 2H), 7.02 – 6.96 (m, 2H), 4.09 (d, *J* = 2.3 Hz, 2H), 3.94 (s, 3H), 2.14 (s, 3H).

**<sup>13</sup>C NMR (101 MHz, CDCl<sub>3</sub>):** δ 208.0, 166.6, 147.7, 140.5, 139.9, 135.0, 133.3, 130.1, 129.6, 129.3, 128.5, 128.4, 128.2, 128.0, 127.9, 123.2, 110.1, 92.9, 61.0, 52.2, 18.9.

**HRMS (m/z, ESI-TOF):** Calcd for C<sub>25</sub>H<sub>21</sub>NSO<sub>6</sub>Na<sup>+</sup> [M+Na<sup>+</sup>] 486.0982, found 486.0982.

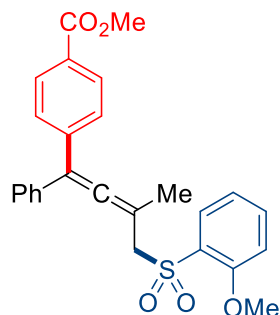

**methyl 4-((2-methoxyphenyl)sulfonyl)-3-methyl-1-phenylbuta-1,2-dien-1-ylbenzoate (42)**

Colorless oil, 35.0mg, **78%** yield. (PE/EtOAc = 20/1)

**<sup>1</sup>H NMR (400 MHz, CDCl<sub>3</sub>):** δ 7.90 (d, *J* = 8.4 Hz, 2H), 7.86 (dd, *J* = 7.9, 1.8 Hz, 1H), 7.33 – 7.24 (m, 4H), 7.14 (d, *J* = 8.4 Hz, 2H), 7.09 (dd, *J* = 6.6, 3.0 Hz, 2H), 6.90 (t, *J* = 7.5 Hz, 1H), 6.63 (d, *J* = 8.4 Hz, 1H), 4.31 (d, *J* = 13.8 Hz, 1H), 4.20 (d, *J* = 14.0 Hz, 1H), 3.92 (s, 3H), 3.77 (s, 3H), 2.04 (s, 3H).

**<sup>13</sup>C NMR (101 MHz, CDCl<sub>3</sub>):** δ 207.8, 166.6, 156.7, 141.1, 135.5, 130.1, 129.5, 128.7, 128.4, 128.4, 128.2, 127.5, 125.8, 120.4, 111.8, 109.4, 93.7, 59.2, 55.9, 52.0, 18.9.

**HRMS (m/z, ESI-TOF):** Calcd for C<sub>26</sub>H<sub>24</sub>SO<sub>5</sub>Na<sup>+</sup> [M+Na<sup>+</sup>] 471.1237, found 471.1245.

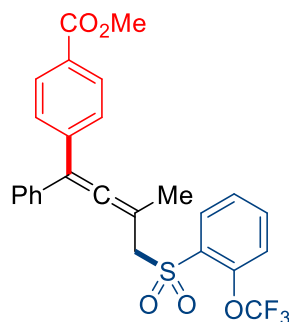

**methyl 4-((2-(trifluoromethoxy)phenyl)sulfonyl)-3-methyl-1-phenylbuta-1,2-dien-1-ylbenzoate (43)**

Colorless oil, 26.0mg, **52%** yield. (PE/EtOAc = 20/1)

**<sup>1</sup>H NMR (400 MHz, CDCl<sub>3</sub>):** δ 7.95 – 7.88 (m, 3H), 7.36 – 7.30 (m, 1H), 7.30 – 7.26 (m, 3H), 7.19 – 7.11 (m, 3H), 7.11 – 7.06 (m, 2H), 7.04 (dt, *J* = 8.4, 1.6 Hz, 1H), 4.25 – 4.13 (m, 2H), 3.93 (s, 3H), 2.07 (s, 3H).

**<sup>13</sup>C NMR (101 MHz, CDCl<sub>3</sub>):** δ 207.8, 166.7, 146.4 (q, *J* = 1.7 Hz), 140.9, 135.4, 135.3, 131.1, 129.8, 129.6, 129.0, 128.5, 128.5, 128.3, 127.7, 126.3, 120.1 (q, *J* = 262.6 Hz), 119.2 (q, *J* = 2.2 Hz), 110.0, 93.0, 60.2, 52.1, 19.2.

**<sup>19</sup>F NMR (376 MHz, CDCl<sub>3</sub>):** δ -56.18.

**HRMS (m/z, ESI-TOF):** Calcd for C<sub>26</sub>H<sub>21</sub>F<sub>3</sub>SO<sub>5</sub>Na<sup>+</sup> [M+Na<sup>+</sup>] 525.0954, found 525.0971.

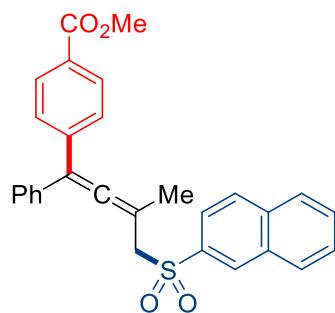

**methyl 4-(3-methyl-4-(naphthalen-2-ylsulfonyl)-1-phenylbuta-1,2-dien-1-yl)benzoate (44)**

Colorless oil, 31.5mg, **67%** yield. (PE/EtOAc = 20/1)

**<sup>1</sup>H NMR (400 MHz, CDCl<sub>3</sub>):** δ 8.41 (s, 1H), 7.85 (d, *J* = 8.1 Hz, 1H), 7.82 – 7.71 (m, 3H), 7.68 – 7.59 (m, 3H), 7.59 – 7.53 (m, 1H), 7.19 – 7.08 (m, 3H), 6.98 (dd, *J* = 8.1, 6.1 Hz, 4H), 4.15 – 4.00 (m, 2H), 3.91 (s, 3H), 2.11 (s, 3H).

**<sup>13</sup>C NMR (101 MHz, CDCl<sub>3</sub>):** δ 208.0, 166.6, 140.7, 135.3, 135.2, 135.2, 132.0, 130.0, 129.5, 129.5, 129.4, 129.2, 128.9, 128.4, 128.2, 128.1, 127.8, 127.6, 122.6, 109.7, 93.5, 61.1, 52.1, 19.1.

**HRMS (m/z, ESI-TOF):** Calcd for C<sub>29</sub>H<sub>24</sub>SO<sub>4</sub>Na<sup>+</sup> [M+Na<sup>+</sup>] 491.1288, found 491.1297.

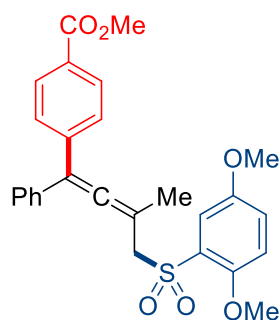

**methyl 4-(4-((2,5-dimethoxyphenyl)sulfonyl)-3-methyl-1-phenylbuta-1,2-dien-1-yl)benzoate (45)**

Colorless oil, 38.5mg, **80%** yield. (PE/EtOAc = 20/1)

**<sup>1</sup>H NMR (400 MHz, CDCl<sub>3</sub>):** δ 7.90 (d, *J* = 8.3 Hz, 2H), 7.38 (d, *J* = 3.2 Hz, 1H), 7.31 – 7.25 (m, 3H), 7.14 (d, *J* = 8.3 Hz, 2H), 7.09 (dd, *J* = 6.7, 3.0 Hz, 2H), 6.77 (dd, *J* = 9.0, 3.2 Hz, 1H), 6.56 (d, *J* = 9.0 Hz, 1H), 4.35 (d, *J* = 13.9 Hz, 1H), 4.20 (d, *J* = 13.9 Hz, 1H), 3.93 (s, 3H), 3.75 (s, 3H), 3.73 (s, 3H), 2.06 (s, 3H).

**<sup>13</sup>C NMR (101 MHz, CDCl<sub>3</sub>):** δ 207.9, 166.7, 153.0, 150.7, 141.0, 135.5, 129.5, 128.8, 128.4, 128.4, 128.2, 127.6, 126.3, 121.2, 114.2, 113.4, 109.5, 93.6, 58.9, 56.5, 55.6, 52.0, 19.1.

**HRMS (m/z, ESI-TOF):** Calcd for C<sub>27</sub>H<sub>26</sub>SO<sub>6</sub>Na<sup>+</sup> [M+Na<sup>+</sup>] 501.1342, found 501.1340.

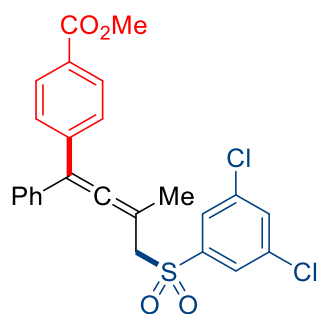

**methyl 4-(4-((3,5-dichlorophenyl)sulfonyl)-3-methyl-1-phenylbuta-1,2-dien-1-yl)benzoate (46)**



Colorless oil, 24.8mg, **51%** yield. (PE/EtOAc = 20/1)

**<sup>1</sup>H NMR (400 MHz, CDCl<sub>3</sub>):** δ 7.97 (d, *J* = 8.0 Hz, 2H), 7.66 (d, *J* = 1.9 Hz, 2H), 7.36 – 7.28 (m, 3H), 7.23 (t, *J* = 1.9 Hz, 1H), 7.17 (d, *J* = 8.1 Hz, 2H), 7.11 – 7.04 (m, 2H), 4.02 (s, 2H), 3.93 (s, 3H), 2.10 (s, 3H).

**<sup>13</sup>C NMR (101 MHz, CDCl<sub>3</sub>):** δ 208.1, 166.6, 140.9, 140.6, 135.9, 135.0, 133.6, 129.7, 129.2, 128.5, 128.3, 128.2, 127.9, 126.2, 110.0, 92.7, 61.0, 52.1, 18.8.

**HRMS (m/z, ESI-TOF):** Calcd for C<sub>25</sub>H<sub>20</sub>Cl<sub>2</sub>SO<sub>4</sub>Na<sup>+</sup> [M+Na<sup>+</sup>] 509.0352, found 509.0346.

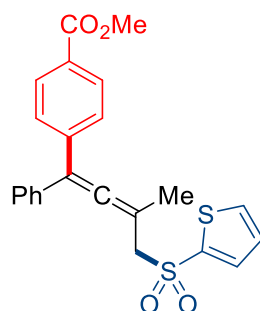

**methyl 4-(3-methyl-1-phenyl-4-(thiophen-2-ylsulfonyl)buta-1,2-dien-1-yl)benzoate (47)**

Colorless oil, 21.2mg, **50%** yield. (PE/EtOAc = 20/1)

**<sup>1</sup>H NMR (400 MHz, CDCl<sub>3</sub>):** δ 7.96 (d, *J* = 8.0 Hz, 2H), 7.56 (d, *J* = 3.7 Hz, 1H), 7.51 (d, *J* = 5.0 Hz, 1H), 7.32 (d, *J* = 6.7 Hz, 3H), 7.23 (d, *J* = 8.1 Hz, 2H), 7.15 (dd, *J* = 7.3, 2.2 Hz, 2H), 6.88 (t, *J* = 4.4 Hz, 1H), 4.07 – 4.01 (m, 2H), 3.92 (s, 3H), 2.09 (s, 3H).

**<sup>13</sup>C NMR (101 MHz, CDCl<sub>3</sub>):** δ 208.0, 166.7, 141.0, 139.0, 135.5, 134.5, 134.1, 129.6, 129.0, 128.6, 128.5, 127.8, 127.7, 109.9, 93.4, 62.8, 52.1, 19.0.

**HRMS (m/z, ESI-TOF):** Calcd for C<sub>23</sub>H<sub>20</sub>S<sub>2</sub>O<sub>4</sub>Na<sup>+</sup> [M+Na<sup>+</sup>] 447.0695, found 447.0696.

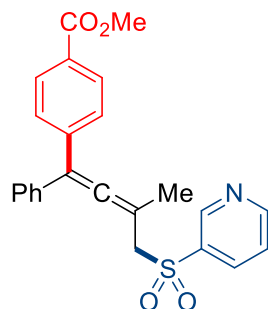

**methyl 4-(3-methyl-1-phenyl-4-(pyridin-3-ylsulfonyl)buta-1,2-dien-1-yl)benzoate (48)**

Colorless oil, 23.8mg, **57%** yield. (PE/EtOAc = 5/1)

**<sup>1</sup>H NMR (400 MHz, CDCl<sub>3</sub>):** δ 9.03 (d, *J* = 2.3 Hz, 1H), 8.59 (dd, *J* = 4.9, 1.6 Hz, 1H), 8.00 (dt, *J* = 8.1, 2.0 Hz, 1H), 7.95 (d, *J* = 8.4 Hz, 2H), 7.34 – 7.29 (m, 3H), 7.17 (d, *J* = 8.4 Hz, 2H), 7.11 – 7.04 (m, 3H), 4.03 (s, 2H), 3.93 (s, 3H), 2.11 (s, 3H).

**<sup>13</sup>C NMR (101 MHz, CDCl<sub>3</sub>):** δ 207.9, 166.6, 154.0, 148.8, 140.6, 135.7, 135.1, 134.6, 129.6, 129.2, 128.5, 128.5, 128.3, 127.9, 123.3, 110.1, 92.9, 61.6, 52.1, 19.1.

**HRMS (m/z, ESI-TOF):** Calcd for C<sub>24</sub>H<sub>21</sub>NSO<sub>4</sub>Na<sup>+</sup> [M+Na<sup>+</sup>] 442.1083, found 442.1092.

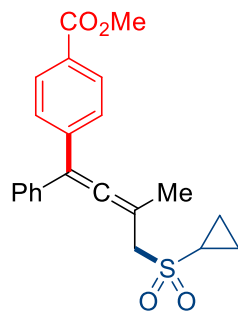

**methyl 4-(4-(cyclopropylsulfonyl)-3-methyl-1-phenylbuta-1,2-dien-1-yl)benzoate (49)**

Colorless oil, 22.9mg, **60%** yield. (PE/EtOAc = 20/1)

**<sup>1</sup>H NMR (400 MHz, CDCl<sub>3</sub>):** δ 8.01 (d, *J* = 8.0 Hz, 2H), 7.42 (d, *J* = 8.1 Hz, 2H), 7.39 – 7.28 (m, 5H), 3.92 (s, 3H), 3.83 (s, 2H), 2.28 – 2.11 (m, 4H), 1.11 (td, *J* = 4.8, 2.4 Hz, 2H), 0.67 (dd, *J* = 8.1, 2.4 Hz, 2H).

**<sup>13</sup>C NMR (101 MHz, CDCl<sub>3</sub>):** δ 208.0, 166.6, 140.9, 135.4, 129.7, 129.2, 128.6, 128.5, 128.3, 127.9, 109.9, 93.6, 58.5, 52.1, 28.9, 19.1, 4.8, 4.8.

**HRMS (m/z, ESI-TOF):** Calcd for C<sub>22</sub>H<sub>22</sub>SO<sub>4</sub>Na<sup>+</sup> [*M*+Na<sup>+</sup>] 405.1131, found 405.1143.

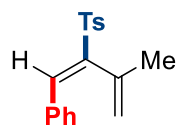

**(*E*)-1-methyl-4-((3-methyl-1-phenylbuta-1,3-dien-2-yl)sulfonyl)benzene (50)**

White solid, 15.1mg, **51%** yield. (PE/EtOAc = 20/1)

**<sup>1</sup>H NMR (400 MHz, CDCl<sub>3</sub>):** δ 7.77 (d, *J* = 8.0 Hz, 2H), 7.71 (s, 1H), 7.63 – 7.57 (m, 2H), 7.40 – 7.33 (m, 3H), 7.30 (d, *J* = 8.0 Hz, 2H), 5.26 (s, 1H), 4.81 (s, 1H), 2.42 (s, 3H), 1.78 (s, 3H).

**<sup>13</sup>C NMR (101 MHz, CDCl<sub>3</sub>):** δ 144.1, 142.3, 136.5, 135.7, 135.7, 133.0, 130.0, 130.0, 129.4, 128.8, 128.6, 121.9, 22.6, 21.6.

**HRMS (m/z, ESI-TOF):** Calcd for C<sub>18</sub>H<sub>18</sub>SO<sub>2</sub>Na<sup>+</sup> [*M*+Na<sup>+</sup>] 321.0920, found 321.0914.

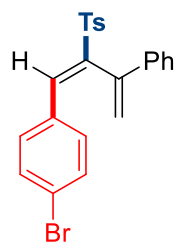

**(*E*)-1-bromo-4-(3-phenyl-2-tosylbuta-1,3-dien-1-yl)benzene (51)**

White solid, 17.0mg, **39%** yield. (PE/EtOAc = 20/1)

**<sup>1</sup>H NMR (400 MHz, CDCl<sub>3</sub>):** δ 7.93 (s, 1H), 7.65 (d, *J* = 7.9 Hz, 2H), 7.41 (d, *J* = 8.4 Hz, 2H), 7.36 (d, *J* = 8.4 Hz, 2H), 7.25 – 7.20 (m, 2H), 7.20 – 7.11 (m, 5H), 5.89 (s, 1H), 5.12 (s, 1H), 2.34 (s, 3H).

**<sup>13</sup>C NMR (101 MHz, CDCl<sub>3</sub>):** δ 144.2, 141.7, 139.3, 137.0, 136.2, 135.4, 131.8, 131.7, 131.5, 129.3, 129.0, 128.4, 128.3, 126.1, 124.7, 120.7, 21.5.

**HRMS (m/z, ESI-TOF):** Calcd for C<sub>23</sub>H<sub>19</sub>BrSO<sub>2</sub>Na<sup>+</sup> [*M*+Na<sup>+</sup>] 461.0181, found 461.0201.

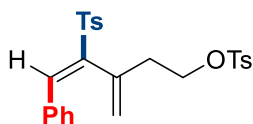

**(E)-3-methylene-5-phenyl-4-tosylpent-4-en-1-yl 4-methylbenzenesulfonate (52)**

White solid, 19.3mg, **40%** yield. (PE/EtOAc = 15/1)

$^1\text{H NMR}$  (400 MHz,  $\text{CDCl}_3$ ):  $\delta$  7.76 – 7.64 (m, 5H), 7.56 (d,  $J$  = 6.8 Hz, 2H), 7.39 – 7.25 (m, 7H), 5.31 (s, 1H), 4.89 (s, 1H), 4.02 (t,  $J$  = 6.5 Hz, 2H), 2.50 – 2.39 (m, 8H).

$^{13}\text{C NMR}$  (101 MHz,  $\text{CDCl}_3$ ):  $\delta$  144.8, 144.5, 140.9, 137.2, 135.4, 135.1, 132.7, 132.4, 130.4, 130.1, 129.8, 129.5, 128.8, 128.7, 127.7, 122.9, 67.2, 34.6, 21.6.

**HRMS** ( $m/z$ , ESI-TOF): Calcd for  $\text{C}_{26}\text{H}_{26}\text{S}_2\text{O}_5\text{Na}^+$  [ $\text{M}+\text{Na}^+$ ] 505.1114, found 505.1111.

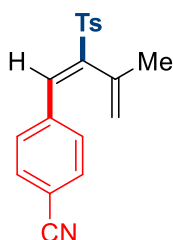

**(E)-4-(3-methyl-2-tosylbuta-1,3-dien-1-yl)benzonitrile (53)**

White solid, 19.2mg, **59%** yield. (PE/EtOAc = 8/1)

$^1\text{H NMR}$  (400 MHz,  $\text{CDCl}_3$ ):  $\delta$  7.76 (d,  $J$  = 7.9 Hz, 2H), 7.73 – 7.61 (m, 5H), 7.33 (d,  $J$  = 7.9 Hz, 2H), 5.30 (s, 1H), 4.82 (s, 1H), 2.44 (s, 3H), 1.75 (s, 3H).

$^{13}\text{C NMR}$  (101 MHz,  $\text{CDCl}_3$ ):  $\delta$  146.0, 144.6, 137.4, 135.7, 134.8, 133.1, 132.3, 130.1, 129.5, 129.0, 122.6, 118.2, 113.1, 22.6, 21.6.

**HRMS** ( $m/z$ , ESI-TOF): Calcd for  $\text{C}_{19}\text{H}_{17}\text{NSO}_2\text{Na}^+$  [ $\text{M}+\text{Na}^+$ ] 346.0872, found 346.0876.

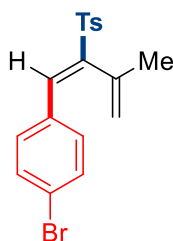

**(E)-1-bromo-4-(3-methyl-2-tosylbuta-1,3-dien-1-yl)benzene (54)**

White solid, 24.4mg, **65%** yield. (PE/EtOAc = 20/1)

$^1\text{H NMR}$  (400 MHz,  $\text{CDCl}_3$ ):  $\delta$  7.76 (d,  $J$  = 8.0 Hz, 2H), 7.64 (s, 1H), 7.52 – 7.43 (m, 4H), 7.31 (d,  $J$  = 7.9 Hz, 2H), 5.27 (s, 1H), 4.80 (s, 1H), 2.43 (s, 3H), 1.75 (s, 3H).

$^{13}\text{C NMR}$  (101 MHz,  $\text{CDCl}_3$ ):  $\delta$  144.3, 143.0, 136.2, 135.3, 134.2, 131.9, 131.9, 131.3, 129.4, 128.9, 124.4, 122.2, 22.6, 21.6.

**HRMS** ( $m/z$ , ESI-TOF): Calcd for  $\text{C}_{18}\text{H}_{17}\text{BrSO}_2\text{Na}^+$  [ $\text{M}+\text{Na}^+$ ] 399.0025, found 399.0021.

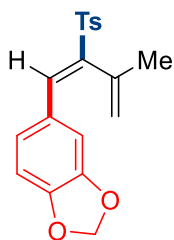

**(E)-5-(3-methyl-2-tosylbuta-1,3-dien-1-yl)benzo[d][1,3]dioxole (55)**

White solid, 16.9mg, 49% yield. (PE/EtOAc = 20/1)

<sup>1</sup>H NMR (400 MHz, CDCl<sub>3</sub>): δ 7.75 (d, *J* = 7.9 Hz, 2H), 7.61 (s, 1H), 7.29 (d, *J* = 8.0 Hz, 2H), 7.18 (s, 1H), 7.09 (d, *J* = 7.7 Hz, 1H), 6.81 (d, *J* = 8.1 Hz, 1H), 5.99 (s, 2H), 5.26 (s, 1H), 4.78 (s, 1H), 2.42 (s, 3H), 1.78 (s, 3H).

<sup>13</sup>C NMR (101 MHz, CDCl<sub>3</sub>): δ 149.2, 147.9, 144.0, 139.8, 136.6, 135.8, 135.3, 129.3, 128.7, 127.0, 126.5, 122.0, 108.6, 108.4, 101.5, 22.6, 21.6.

HRMS (m/z, ESI-TOF): Calcd for C<sub>19</sub>H<sub>18</sub>SO<sub>4</sub>Na<sup>+</sup> [M+Na<sup>+</sup>] 365.0818, found 365.0819.

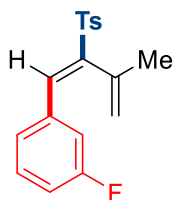

**(E)-1-fluoro-3-(3-methyl-2-tosylbuta-1,3-dien-1-yl)benzene (56)**

White solid, 17.5mg, 55% yield. (PE/EtOAc = 20/1)

<sup>1</sup>H NMR (400 MHz, CDCl<sub>3</sub>): δ 7.76 (d, *J* = 8.3 Hz, 2H), 7.67 (s, 1H), 7.40 – 7.28 (m, 5H), 7.12 – 7.02 (m, 1H), 5.28 (s, 1H), 4.81 (s, 1H), 2.43 (s, 3H), 1.77 (s, 3H).

<sup>13</sup>C NMR (101 MHz, CDCl<sub>3</sub>): δ 162.6 (d, *J* = 247.3 Hz), 144.3, 143.7, 136.1, 135.3, 135.0 (d, *J* = 7.9 Hz), 134.1 (d, *J* = 2.7 Hz), 130.2 (d, *J* = 8.4 Hz), 129.4, 128.9, 126.1 (d, *J* = 2.6 Hz), 122.2, 116.9 (d, *J* = 21.4 Hz), 116.0 (d, *J* = 22.6 Hz), 22.6, 21.6.

<sup>19</sup>F NMR (376 MHz, CDCl<sub>3</sub>): δ -112.19.

HRMS (m/z, ESI-TOF): Calcd for C<sub>18</sub>H<sub>17</sub>FSO<sub>2</sub>Na<sup>+</sup> [M+Na<sup>+</sup>] 339.0825, found 339.0826.

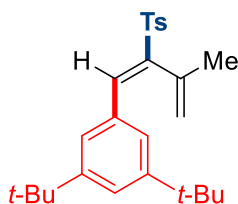

**(E)-1,3-di-tert-butyl-5-(3-methyl-2-tosylbuta-1,3-dien-1-yl)benzene (57)**

White solid, 18.1mg, 44% yield. (PE/EtOAc = 20/1)

<sup>1</sup>H NMR (400 MHz, CDCl<sub>3</sub>): δ 7.77 (d, *J* = 8.0 Hz, 2H), 7.74 (s, 1H), 7.51 (d, *J* = 1.8 Hz, 2H), 7.43 (s, 1H), 7.30 (d, *J* = 7.9 Hz, 2H), 5.28 (s, 1H), 4.75 (s, 1H), 2.43 (s, 3H), 1.83 (s, 3H), 1.30 (s, 18H).

<sup>13</sup>C NMR (101 MHz, CDCl<sub>3</sub>): δ 151.1, 144.0, 140.8, 137.4, 136.9, 135.9, 132.1, 129.4, 128.8, 124.8, 124.4, 121.2, 34.9, 31.3, 22.7, 21.6.

HRMS (m/z, ESI-TOF): Calcd for C<sub>26</sub>H<sub>34</sub>SO<sub>2</sub>Na<sup>+</sup> [M+Na<sup>+</sup>] 433.2172, found 433.2167.

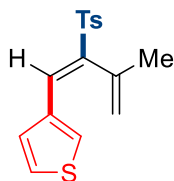

**(E)-3-(3-methyl-2-tosylbuta-1,3-dien-1-yl)thiophene (58)**

White solid, 10.2mg, **33%** yield. (PE/EtOAc = 20/1)

<sup>1</sup>H NMR (400 MHz, CDCl<sub>3</sub>): δ 7.75 (d, *J* = 8.3 Hz, 2H), 7.71 (s, 1H), 7.66 (dd, *J* = 3.1, 1.3 Hz, 1H), 7.35 (dd, *J* = 5.1, 1.3 Hz, 1H), 7.33 – 7.27 (m, 3H), 5.26 (s, 1H), 4.70 (s, 1H), 2.43 (s, 3H), 1.85 (s, 3H).  
<sup>13</sup>C NMR (101 MHz, CDCl<sub>3</sub>): δ 144.1, 140.5, 137.0, 135.8, 134.8, 129.7, 129.6, 129.4, 128.8, 127.6, 126.3, 121.7, 22.7, 21.6.

**HRMS (m/z, ESI-TOF):** Calcd for C<sub>16</sub>H<sub>16</sub>S<sub>2</sub>O<sub>2</sub>Na<sup>+</sup> [M+Na<sup>+</sup>] 327.0484, found 327.0478.

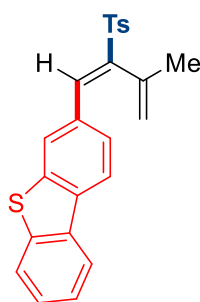

**(E)-3-(3-methyl-2-tosylbuta-1,3-dien-1-yl)dibenzo[b,d]thiophene (59)**

White solid, 15.8mg, **39%** yield. (PE/EtOAc = 20/1)

<sup>1</sup>H NMR (400 MHz, CDCl<sub>3</sub>): δ 8.21 – 8.04 (m, 3H), 7.90 – 7.83 (m, 2H), 7.79 (d, *J* = 8.0 Hz, 2H), 7.71 (d, *J* = 8.3 Hz, 1H), 7.53 – 7.44 (m, 2H), 7.31 (d, *J* = 8.0 Hz, 2H), 5.34 (s, 1H), 4.89 (s, 1H), 2.43 (s, 3H), 1.81 (s, 3H).

<sup>13</sup>C NMR (101 MHz, CDCl<sub>3</sub>): δ 144.2, 142.4, 140.3, 139.7, 136.7, 136.6, 135.6, 135.3, 134.7, 131.5, 129.4, 128.9, 127.4, 126.1, 124.6, 124.4, 122.9, 122.3, 122.0, 121.6, 22.7, 21.6.

**HRMS (m/z, ESI-TOF):** Calcd for C<sub>24</sub>H<sub>20</sub>S<sub>2</sub>O<sub>2</sub>Na<sup>+</sup> [M+Na<sup>+</sup>] 427.0797, found 427.0792.

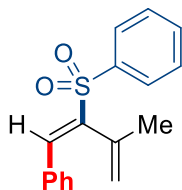

**(E)-((3-methyl-1-phenylbuta-1,3-dien-2-yl)sulfonyl)benzene (60)**

White solid, 12.8mg, **45%** yield. (PE/EtOAc = 20/1)

<sup>1</sup>H NMR (400 MHz, CDCl<sub>3</sub>): δ 7.90 (d, *J* = 7.3 Hz, 2H), 7.74 (s, 1H), 7.66 – 7.56 (m, 3H), 7.51 (t, *J* = 7.6 Hz, 2H), 7.41 – 7.33 (m, 3H), 5.26 (s, 1H), 4.79 (s, 1H), 1.78 (s, 3H).

<sup>13</sup>C NMR (101 MHz, CDCl<sub>3</sub>): δ 141.9, 138.6, 136.5, 136.1, 133.2, 132.9, 130.2, 130.0, 128.8, 128.7, 128.7, 122.0, 22.6.

**HRMS (m/z, ESI-TOF):** Calcd for C<sub>17</sub>H<sub>16</sub>SO<sub>2</sub>Na<sup>+</sup> [M+Na<sup>+</sup>] 307.0763, found 307.0766.

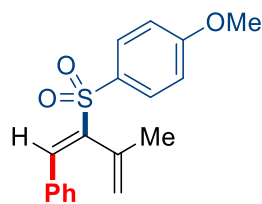

**(E)-1-methoxy-4-((3-methyl-1-phenylbuta-1,3-dien-2-yl)sulfonyl)benzene (61)**

White solid, 12.8mg, 41% yield. (PE/EtOAc = 20/1)

<sup>1</sup>H NMR (400 MHz, CDCl<sub>3</sub>): δ 7.81 (d, *J* = 8.9 Hz, 2H), 7.69 (s, 1H), 7.63 – 7.57 (m, 2H), 7.40 – 7.32 (m, 3H), 6.97 (d, *J* = 8.9 Hz, 2H), 5.27 (s, 1H), 4.81 (s, 1H), 3.87 (s, 3H), 1.78 (s, 3H).

<sup>13</sup>C NMR (101 MHz, CDCl<sub>3</sub>): δ 163.3, 142.4, 136.7, 135.2, 133.0, 131.0, 130.1, 130.0, 130.0, 128.6, 121.8, 113.9, 55.6, 22.7.

HRMS (*m/z*, ESI-TOF): Calcd for C<sub>18</sub>H<sub>18</sub>SO<sub>3</sub>Na<sup>+</sup> [*M*+Na<sup>+</sup>] 337.0869, found 337.0866.

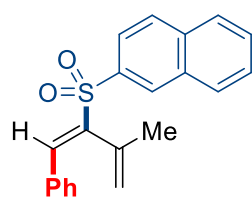

**(E)-2-((3-methyl-1-phenylbuta-1,3-dien-2-yl)sulfonyl)naphthalene (62)**

White solid, 15.6mg, 47% yield. (PE/EtOAc = 20/1)

<sup>1</sup>H NMR (400 MHz, CDCl<sub>3</sub>): δ 8.49 (s, 1H), 8.00 – 7.88 (m, 3H), 7.86 – 7.80 (m, 2H), 7.68 – 7.58 (m, 4H), 7.40 – 7.33 (m, 3H), 5.23 (s, 1H), 4.76 (s, 1H), 1.79 (s, 3H).

<sup>13</sup>C NMR (101 MHz, CDCl<sub>3</sub>): δ 141.8, 136.5, 136.4, 135.5, 135.0, 132.9, 131.9, 130.6, 130.2, 130.1, 129.4, 129.0, 129.0, 128.7, 127.9, 127.5, 123.5, 122.0, 22.7.

HRMS (*m/z*, ESI-TOF): Calcd for C<sub>21</sub>H<sub>18</sub>SO<sub>2</sub>Na<sup>+</sup> [*M*+Na<sup>+</sup>] 357.0920, found 357.0915.

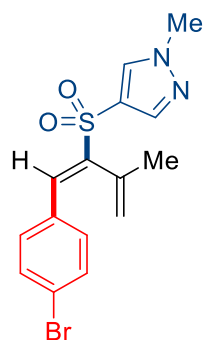

**(E)-4-((1-(4-bromophenyl)-3-methylbuta-1,3-dien-2-yl)sulfonyl)-1-methyl-1H-pyrazole (63)**

White solid, 19.1mg, 52% yield. (PE/EtOAc = 10/1)

<sup>1</sup>H NMR (400 MHz, CDCl<sub>3</sub>): δ 7.83 (s, 1H), 7.76 (s, 1H), 7.57 (s, 1H), 7.53 – 7.43 (m, 4H), 5.39 (s, 1H), 5.01 (s, 1H), 3.96 (s, 3H), 1.85 (s, 3H).

<sup>13</sup>C NMR (101 MHz, CDCl<sub>3</sub>): δ 143.5, 140.1, 136.4, 133.5, 133.3, 131.9, 131.7, 131.3, 124.4, 122.2, 120.7, 39.6, 22.8.

HRMS (*m/z*, ESI-TOF): Calcd for C<sub>15</sub>H<sub>15</sub>BrN<sub>2</sub>SO<sub>2</sub>Na<sup>+</sup> [*M*+Na<sup>+</sup>] 388.9930, found 388.9938.

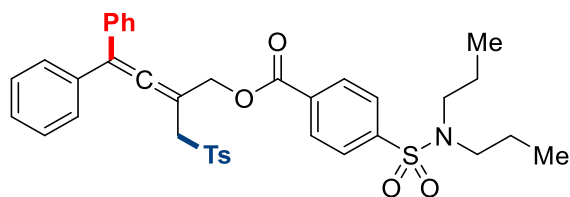

**4,4-diphenyl-2-(tosylmethyl)buta-2,3-dien-1-yl 4-(N,N-dipropylsulfamoyl)benzoate (64)**

Colorless oil, 43.4mg, **66%** yield. (PE/EtOAc = 10/1)

**<sup>1</sup>H NMR (400 MHz, CDCl<sub>3</sub>):** δ 8.05 (d, *J* = 8.1 Hz, 2H), 7.80 (d, *J* = 8.1 Hz, 2H), 7.70 (d, *J* = 7.9 Hz, 2H), 7.33 – 7.20 (m, 6H), 7.17 – 7.02 (m, 6H), 5.15 (s, 2H), 4.11 (s, 2H), 3.08 (t, *J* = 7.7 Hz, 4H), 2.31 (s, 3H), 1.61 – 1.45 (m, 4H), 0.85 (t, *J* = 7.4 Hz, 6H).

**<sup>13</sup>C NMR (101 MHz, CDCl<sub>3</sub>):** δ 207.4, 164.4, 144.6, 144.1, 134.8, 134.7, 132.8, 130.1, 129.6, 128.4, 128.2, 128.0, 127.8, 126.7, 113.9, 93.6, 64.1, 57.7, 49.7, 21.7, 21.5, 11.0.

**HRMS (m/z, ESI-TOF):** Calcd for C<sub>37</sub>H<sub>39</sub>NS<sub>2</sub>O<sub>6</sub>Na<sup>+</sup> [M+Na<sup>+</sup>] 680.2111, found 680.2091.

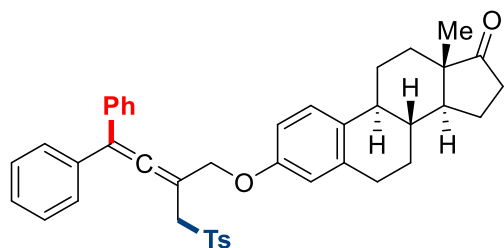

**(8R,9S,13S,14S)-3-((4,4-diphenyl-2-(tosylmethyl)buta-2,3-dien-1-yl)oxy)-13-methyl-6,7,8,9,11,12,13,14,15,16-decahydro-17H-cyclopenta[a]phenanthren-17-one (65)**

Colorless oil, 32.7mg, **51%** yield. (PE/EtOAc = 10/1)

**<sup>1</sup>H NMR (400 MHz, CDCl<sub>3</sub>):** δ 7.65 (d, *J* = 7.9 Hz, 2H), 7.33 – 7.25 (m, 6H), 7.16 – 7.08 (m, 4H), 7.07 – 6.99 (m, 3H), 6.65 (dd, *J* = 8.6, 2.7 Hz, 1H), 6.55 (d, *J* = 2.7 Hz, 1H), 4.82 (s, 2H), 4.05 (s, 2H), 2.75 – 2.55 (m, 2H), 2.53 – 2.44 (m, 1H), 2.35 – 2.25 (m, 4H), 2.19 – 2.14 (m, 1H), 2.13 – 1.99 (m, 2H), 1.97 – 1.87 (m, 2H), 1.67 – 1.56 (m, 1H), 1.53 – 1.43 (m, 4H), 1.37 – 1.29 (m, 1H), 0.90 (s, 3H).

**<sup>13</sup>C NMR (101 MHz, CDCl<sub>3</sub>):** δ 207.5, 155.7, 144.4, 137.6, 135.1, 135.1, 135.1, 132.3, 129.5, 128.7, 128.2, 128.0, 127.7, 126.2, 114.7, 113.1, 112.8, 94.2, 67.3, 56.5, 50.2, 47.9, 43.8, 38.1, 35.8, 31.4, 29.3, 26.4, 25.7, 21.6, 21.5, 13.7.

**HRMS (m/z, ESI-TOF):** Calcd for C<sub>42</sub>H<sub>42</sub>SO<sub>4</sub>Na<sup>+</sup> [M+Na<sup>+</sup>] 665.2696, found 665.2678.

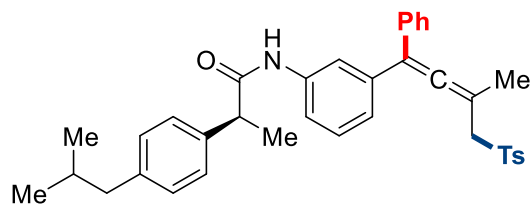

**(2S)-2-(4-isobutylphenyl)-N-(3-(3-methyl-1-phenyl-4-tosylbuta-1,2-dien-1-yl)phenyl)propanamide (66)** White solid, 42.4mg, **73%** yield. (PE/EtOAc = 8/1)

**<sup>1</sup>H NMR (400 MHz, CDCl<sub>3</sub>):** δ 7.67 – 7.58 (m, 3H), 7.48 (s, 1H), 7.28 – 7.21 (m, 5H), 7.20 – 7.14 (m, 2H), 7.13 – 7.04 (m, 4H), 7.02 (d, *J* = 8.1 Hz, 2H), 6.80 (d, *J* = 7.5 Hz, 1H), 3.88 (d, *J* = 1.9 Hz, 2H), 3.69 – 3.61 (m, 1H), 2.41 (dd, *J* = 7.2, 1.8 Hz, 2H), 2.26 (s, 3H), 1.99 (d, *J* = 3.2 Hz, 3H), 1.86 – 1.77 (m, 1H), 1.53 (d, *J* = 7.1 Hz, 3H), 0.87 (d, *J* = 6.6 Hz, 6H).

$^{13}\text{C}$  NMR (101 MHz,  $\text{CDCl}_3$ ):  $\delta$  207.5, 172.6, 144.4, 140.7, 138.2, 138.0, 138.0, 136.8, 136.8, 135.8, 135.7, 135.1, 129.5, 129.5, 128.6, 128.4, 128.1, 127.9, 127.9, 127.3, 127.2, 124.2, 119.6, 118.8, 109.8, 92.6, 61.3, 61.3, 47.4, 44.8, 30.0, 22.2, 21.5, 19.1, 19.0, 18.5.

HRMS (m/z, ESI-TOF): Calcd for  $\text{C}_{37}\text{H}_{39}\text{NSO}_3\text{Na}^+$  [ $\text{M}+\text{Na}^+$ ] 600.2543, found 600.2556.

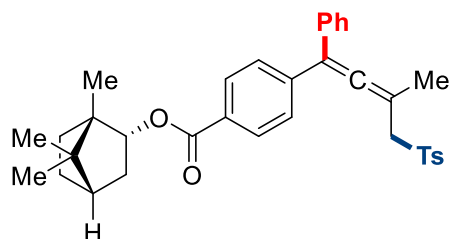

**(1S,2R,4S)-1,7,7-trimethylbicyclo[2.2.1]heptan-2-yl 4-(3-methyl-1-phenyl-4-tosylbuta-1,2-dien-1-yl)benzoate (67)** Colorless oil, 35.7mg, 64% yield. (PE/EtOAc = 20/1)

$^1\text{H}$  NMR (400 MHz,  $\text{CDCl}_3$ ):  $\delta$  7.96 (d,  $J$  = 8.0 Hz, 2H), 7.70 (d,  $J$  = 7.9 Hz, 2H), 7.33 – 7.25 (m, 3H), 7.21 – 7.07 (m, 6H), 5.13 (d,  $J$  = 9.8 Hz, 1H), 4.04 – 3.87 (m, 2H), 2.56 – 2.44 (m, 1H), 2.34 (s, 3H), 2.20 – 2.04 (m, 4H), 1.89 – 1.78 (m, 1H), 1.77 – 1.70 (m, 1H), 1.48 – 1.37 (m, 1H), 1.36 – 1.26 (m, 1H), 1.12 (dd,  $J$  = 13.9, 3.5 Hz, 1H), 0.98 (s, 3H), 0.92 (s, 6H).

$^{13}\text{C}$  NMR (101 MHz,  $\text{CDCl}_3$ ):  $\delta$  207.8, 166.4, 144.4, 140.8, 135.4, 135.1, 129.6, 129.6, 129.4, 128.5, 128.4, 128.3, 128.0, 127.6, 109.6, 93.4, 80.4, 61.1, 49.0, 47.8, 44.8, 36.8, 28.0, 27.3, 21.6, 19.6, 19.0, 18.8, 13.5.

HRMS (m/z, ESI-TOF): Calcd for  $\text{C}_{35}\text{H}_{38}\text{SO}_4\text{Na}^+$  [ $\text{M}+\text{Na}^+$ ] 577.2383, found 577.2387.

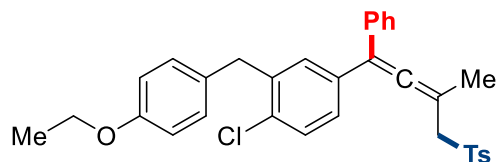

**1-chloro-2-(4-ethoxybenzyl)-4-(3-methyl-1-phenyl-4-tosylbuta-1,2-dien-1-yl)benzene (68)**

Colorless oil, 21.1mg, 39% yield. (PE/EtOAc = 10/1)

$^1\text{H}$  NMR (400 MHz,  $\text{CDCl}_3$ ):  $\delta$  7.63 (d,  $J$  = 7.9 Hz, 2H), 7.29 – 7.20 (m, 4H), 7.14 – 6.99 (m, 7H), 6.88 (d,  $J$  = 8.4 Hz, 1H), 6.81 (d,  $J$  = 8.2 Hz, 2H), 4.03 – 3.93 (m, 4H), 3.86 (d,  $J$  = 3.0 Hz, 2H), 2.30 (s, 3H), 1.98 (s, 3H), 1.38 (t,  $J$  = 7.0 Hz, 3H).

$^{13}\text{C}$  NMR (101 MHz,  $\text{CDCl}_3$ ):  $\delta$  207.5, 157.4, 144.4, 139.0, 135.6, 135.3, 134.9, 133.1, 131.1, 129.8, 129.5, 129.2, 128.4, 128.2, 128.0, 127.6, 127.5, 114.4, 109.3, 93.1, 63.3, 61.2, 38.3, 21.6, 19.1, 14.8.

HRMS (m/z, ESI-TOF): Calcd for  $\text{C}_{33}\text{H}_{31}\text{ClSO}_3\text{Na}^+$  [ $\text{M}+\text{Na}^+$ ] 565.1575, found 565.1586.

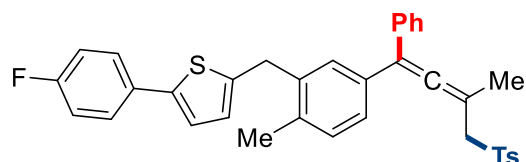

**2-(4-fluorophenyl)-5-(2-methyl-5-(3-methyl-1-phenyl-4-tosylbuta-1,2-dien-1-yl)benzyl)thiophene (69)**

Colorless oil, 14.6mg, 25% yield. (PE/EtOAc = 10/1)

$^1\text{H}$  NMR (400 MHz,  $\text{CDCl}_3$ ):  $\delta$  7.67 (d,  $J$  = 8.0 Hz, 2H), 7.50 – 7.43 (m, 2H), 7.28 – 7.23 (m, 3H), 7.14



– 6.99 (m, 9H), 6.93 (dd,  $J = 7.7, 1.9$  Hz, 1H), 6.67 (d,  $J = 3.6$  Hz, 1H), 4.08 (s, 2H), 3.89 (d,  $J = 3.9$  Hz, 2H), 2.32 (d,  $J = 9.0$  Hz, 6H), 2.01 (s, 3H).

$^{13}\text{C}$  NMR (101 MHz,  $\text{CDCl}_3$ ):  $\delta$  207.6, 162.0 (d,  $J = 247.7$  Hz), 144.3, 143.1, 141.5, 138.2, 136.1, 135.7, 135.4, 134.0, 130.7 (d,  $J = 3.3$  Hz), 130.4, 129.7, 129.6, 128.6, 128.2, 128.1, 127.3, 127.1, 127.0 (d,  $J = 8.0$  Hz), 126.0, 122.6, 115.7 (d,  $J = 21.9$  Hz), 109.9, 92.6, 61.5, 34.1, 21.6, 19.2, 19.2.

$^{19}\text{F}$  NMR (376 MHz,  $\text{CDCl}_3$ ):  $\delta$  -115.03.

HRMS (m/z, ESI-TOF): Calcd for  $\text{C}_{36}\text{H}_{31}\text{FS}_2\text{O}_2\text{Na}^+$  [ $\text{M}+\text{Na}^+$ ] 601.1642, found 601.1626.

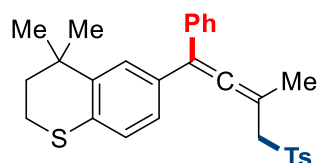

#### 4,4-dimethyl-6-(3-methyl-1-phenyl-4-tosylbuta-1,2-dien-1-yl)thiochromane (70)

Colorless oil, 16.9mg, 35% yield. (PE/EtOAc = 20/1)

$^1\text{H}$  NMR (400 MHz,  $\text{CDCl}_3$ ):  $\delta$  7.68 (d,  $J = 7.9$  Hz, 2H), 7.29 – 7.23 (m, 4H), 7.16 – 7.06 (m, 4H), 6.98 (d,  $J = 8.2$  Hz, 1H), 6.74 (dd,  $J = 8.2, 2.0$  Hz, 1H), 3.91 (d,  $J = 2.4$  Hz, 2H), 3.07 – 2.99 (m, 2H), 2.36 (s, 3H), 2.04 (s, 3H), 1.99 – 1.93 (m, 2H), 1.28 (d,  $J = 5.1$  Hz, 6H).

$^{13}\text{C}$  NMR (101 MHz,  $\text{CDCl}_3$ ):  $\delta$  207.5, 144.4, 141.8, 136.1, 135.5, 131.6, 131.2, 129.6, 128.5, 128.2, 128.1, 127.4, 126.9, 126.3, 126.3, 110.1, 92.6, 61.5, 37.6, 33.0, 30.1, 30.1, 23.1, 21.7, 19.4.

HRMS (m/z, ESI-TOF): Calcd for  $\text{C}_{29}\text{H}_{30}\text{S}_2\text{O}_2\text{Na}^+$  [ $\text{M}+\text{Na}^+$ ] 497.1579, found 497.1567.

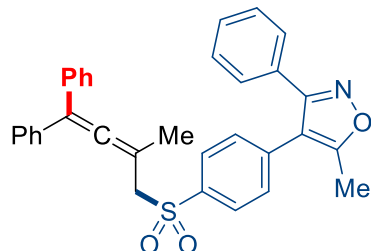

#### 5-methyl-4-(4-((2-methyl-4,4-diphenylbuta-2,3-dien-1-yl)sulfonyl)phenyl)-3-phenylisoxazole (71)

Colorless oil, 22.9mg, 44% yield. (PE/EtOAc = 8/1)

$^1\text{H}$  NMR (400 MHz,  $\text{CDCl}_3$ ):  $\delta$  7.80 (d,  $J = 8.5$  Hz, 2H), 7.37 – 7.20 (m, 16H), 7.10 (d,  $J = 8.4$  Hz, 2H), 3.95 (s, 2H), 2.40 (s, 3H), 2.05 (s, 3H).

$^{13}\text{C}$  NMR (101 MHz,  $\text{CDCl}_3$ ):  $\delta$  207.5, 167.2, 160.9, 137.7, 136.0, 136.0, 130.0, 129.6, 128.6, 128.6, 128.5, 128.3, 128.3, 127.5, 114.2, 110.5, 92.4, 61.5, 19.7, 11.8.

HRMS (m/z, ESI-TOF): Calcd for  $\text{C}_{33}\text{H}_{27}\text{NSO}_3\text{Na}^+$  [ $\text{M}+\text{Na}^+$ ] 540.1604, found 540.1616.

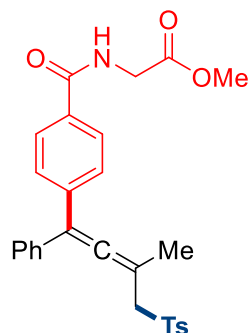

**methyl (4-(3-methyl-1-phenyl-4-tosylbuta-1,2-dien-1-yl)benzoyl)glycinate (72)**

White solid, 36.3mg, 74% yield. (PE/EtOAc = 5/1)

<sup>1</sup>H NMR (400 MHz, CDCl<sub>3</sub>): δ 7.74 (d, *J* = 8.0 Hz, 2H), 7.67 (d, *J* = 7.9 Hz, 2H), 7.32 – 7.25 (m, 4H), 7.17 (d, *J* = 8.0 Hz, 3H), 7.10 (d, *J* = 7.4 Hz, 5H), 4.22 (d, *J* = 5.3 Hz, 2H), 4.00 – 3.87 (m, 2H), 3.76 (s, 3H), 2.33 (s, 3H), 2.05 (s, 3H).

<sup>13</sup>C NMR (101 MHz, CDCl<sub>3</sub>): δ 207.7, 170.3, 166.9, 144.6, 139.7, 135.4, 135.0, 132.3, 129.6, 128.5, 128.4, 128.3, 127.9, 127.6, 127.0, 109.5, 93.2, 61.0, 52.2, 41.5, 21.5, 19.0.

HRMS (m/z, ESI-TOF): Calcd for C<sub>28</sub>H<sub>27</sub>NSO<sub>5</sub>Na<sup>+</sup> [M+Na<sup>+</sup>] 512.1502, found 512.1506.

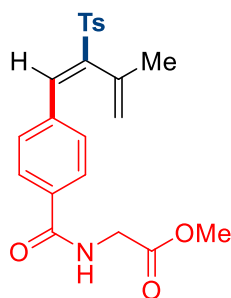

**methyl (*E*)-(4-(3-methyl-2-tosylbuta-1,3-dien-1-yl)benzoyl)glycinate (73)**

White solid, 8.2mg, 20% yield. (PE/EtOAc = 8/1)

<sup>1</sup>H NMR (400 MHz, CDCl<sub>3</sub>): δ 7.80 (d, *J* = 8.2 Hz, 2H), 7.77 (d, *J* = 8.0 Hz, 2H), 7.72 (s, 1H), 7.66 (d, *J* = 8.2 Hz, 2H), 7.32 (d, *J* = 7.9 Hz, 2H), 6.72 (t, *J* = 5.0 Hz, 1H), 5.28 (s, 1H), 4.83 (s, 1H), 4.25 (d, *J* = 5.0 Hz, 2H), 3.81 (s, 3H), 2.44 (s, 3H), 1.75 (s, 3H).

<sup>13</sup>C NMR (101 MHz, CDCl<sub>3</sub>): δ 170.3, 166.5, 144.4, 136.4, 136.2, 135.2, 134.6, 134.2, 130.0, 129.5, 129.0, 127.4, 122.3, 52.5, 41.7, 22.7, 21.6.

HRMS (m/z, ESI-TOF): Calcd for C<sub>22</sub>H<sub>23</sub>NSO<sub>5</sub>Na<sup>+</sup> [M+Na<sup>+</sup>] 436.1189, found 436.1183.

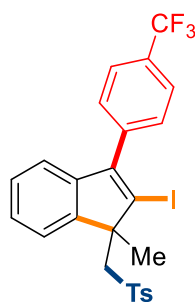

**2-iodo-1-methyl-1-(tosylmethyl)-3-(4-(trifluoromethyl)phenyl)-1H-indene (74)**

White solid, 49.8mg, 88% yield. (PE/EtOAc = 8/1)

<sup>1</sup>H NMR (400 MHz, CDCl<sub>3</sub>): δ 7.75 (d, *J* = 8.0 Hz, 2H), 7.60 (d, *J* = 8.0 Hz, 2H), 7.31 (d, *J* = 8.4 Hz, 2H), 7.16 (d, *J* = 7.5 Hz, 2H), 7.12 – 7.02 (m, 3H), 6.96 (td, *J* = 7.4, 1.2 Hz, 1H), 3.76 (q, *J* = 14.8 Hz, 2H), 2.35 (s, 3H), 1.34 (s, 3H).

<sup>13</sup>C NMR (101 MHz, CDCl<sub>3</sub>): δ 146.6, 146.2, 144.0, 142.4, 138.8 (q, *J* = 1.8 Hz), 137.0, 130.2 (q, *J* = 32.7 Hz), 129.4, 127.7, 127.4, 125.7, 125.4 (q, *J* = 3.8 Hz), 123.5, 124.1 (q, *J* = 273.1 Hz), 120.1, 112.9, 62.3, 54.4, 26.5, 21.5.

<sup>19</sup>F NMR (376 MHz, CDCl<sub>3</sub>): δ -62.50.

HRMS (m/z, ESI-TOF): Calcd for C<sub>25</sub>H<sub>20</sub>F<sub>3</sub>ISO<sub>2</sub>Na<sup>+</sup> [M+Na<sup>+</sup>] 591.0073, found 591.0073.

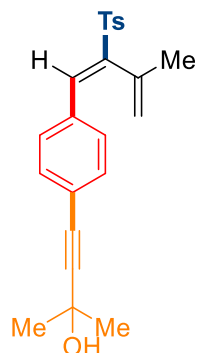

**(E)-2-methyl-4-(4-(3-methyl-2-tosylbuta-1,3-dien-1-yl)phenyl)but-3-yn-2-ol (75)**

White solid, 35.0mg, **92%** yield. (PE/EtOAc = 5/1)

**<sup>1</sup>H NMR (400 MHz, CDCl<sub>3</sub>):** δ 7.76 (d, *J* = 8.0 Hz, 2H), 7.66 (s, 1H), 7.52 (d, *J* = 8.1 Hz, 2H), 7.38 (d, *J* = 8.1 Hz, 2H), 7.30 (d, *J* = 8.0 Hz, 2H), 5.26 (s, 1H), 4.81 (s, 1H), 2.42 (s, 3H), 2.24 (s, 1H), 1.74 (s, 3H), 1.61 (s, 6H).

**<sup>13</sup>C NMR (101 MHz, CDCl<sub>3</sub>):** δ 144.2, 143.0, 136.4, 135.5, 134.7, 132.8, 131.8, 129.7, 129.4, 128.9, 124.5, 122.1, 96.0, 81.5, 65.6, 31.4, 31.0, 22.6, 21.6.

**HRMS (m/z, ESI-TOF):** Calcd for C<sub>23</sub>H<sub>24</sub>SO<sub>3</sub>Na<sup>+</sup> [M+Na<sup>+</sup>] 403.1338, found 403.1345.

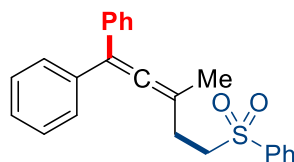

**(3-methyl-5-(phenylsulfonyl)penta-1,2-diene-1,1-diyl)dibenzene (76)**

Colorless oil, 17.4mg, **46%** yield. (PE/EtOAc = 20/1)

**<sup>1</sup>H NMR (400 MHz, CDCl<sub>3</sub>):** δ 7.93 – 7.86 (m, 2H), 7.66 (t, *J* = 7.4 Hz, 1H), 7.55 (t, *J* = 7.7 Hz, 2H), 7.36 – 7.21 (m, 10H), 3.34 – 3.22 (m, 2H), 2.56 – 2.45 (m, 2H), 1.87 (s, 3H).

**<sup>13</sup>C NMR (101 MHz, CDCl<sub>3</sub>):** δ 201.8, 138.6, 136.9, 133.8, 129.3, 128.3, 128.3, 128.1, 127.3, 111.3, 100.3, 54.2, 27.2, 19.3.

**HRMS (m/z, ESI-TOF):** Calcd for C<sub>24</sub>H<sub>22</sub>SO<sub>2</sub>Na<sup>+</sup> [M+Na<sup>+</sup>] 397.1233, found 397.1233.

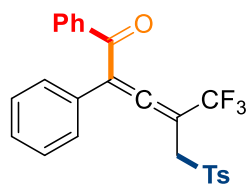

**5,5,5-trifluoro-1,2-diphenyl-4-(tosylmethyl)penta-2,3-dien-1-one (77)**

Colorless oil, 9.5mg, **21%** yield. (PE/EtOAc = 15/1)

**<sup>1</sup>H NMR (400 MHz, CDCl<sub>3</sub>):** δ 7.95 (d, *J* = 7.7 Hz, 2H), 7.65 (t, *J* = 7.4 Hz, 1H), 7.55 – 7.47 (m, 4H), 7.45 – 7.35 (m, 5H), 7.13 (d, *J* = 7.9 Hz, 2H), 3.94 (s, 2H), 2.37 (s, 3H).

**<sup>13</sup>C NMR (101 MHz, CDCl<sub>3</sub>):** δ 209.3 (q, *J* = 3.5 Hz), 189.6, 145.3, 136.8, 134.6, 134.2, 130.0, 129.8, 129.7, 129.5, 129.0, 128.8, 128.3, 128.3, 121.9 (q, *J* = 276.5 Hz), 115.8, 94.5 (q, *J* = 37.5 Hz), 53.6, 21.7.

**<sup>19</sup>F NMR (376 MHz, CDCl<sub>3</sub>):** δ -62.15.

**HRMS (m/z, ESI-TOF):** Calcd for C<sub>25</sub>H<sub>19</sub>F<sub>3</sub>SO<sub>3</sub>Na<sup>+</sup> [M+Na<sup>+</sup>] 479.0899, found 479.0902.

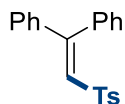

**(2-tosylethene-1,1-diyl)dibenzene (78)**

Colorless oil, 10.0mg, **30%** yield. (PE/EtOAc = 15/1)

**<sup>1</sup>H NMR (400 MHz, CDCl<sub>3</sub>):** δ 7.47 (d, *J* = 8.3 Hz, 2H), 7.40 – 7.34 (m, 2H), 7.33 – 7.27 (m, 4H), 7.22 – 7.18 (m, 2H), 7.15 (d, *J* = 8.1 Hz, 2H), 7.12 – 7.07 (m, 2H), 6.99 (s, 1H), 2.38 (s, 3H).

**<sup>13</sup>C NMR (101 MHz, CDCl<sub>3</sub>):** δ 154.7, 143.7, 139.2, 138.5, 135.5, 130.2, 129.7, 129.3, 128.9, 128.8, 128.5, 128.2, 127.8, 127.7, 21.5.

**HRMS (m/z, ESI-TOF):** Calcd for C<sub>21</sub>H<sub>18</sub>SO<sub>2</sub>Na<sup>+</sup> [M+Na<sup>+</sup>] 357.0920, found 357.0922.

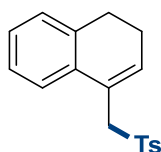

**4-(tosylmethyl)-1,2-dihydronaphthalene (79)**

Colorless oil, 11.4mg, **38%** yield. (PE/EtOAc = 20/1)

**<sup>1</sup>H NMR (400 MHz, CDCl<sub>3</sub>):** δ 7.67 (d, *J* = 8.0 Hz, 2H), 7.22 (d, *J* = 8.0 Hz, 2H), 7.17 – 7.05 (m, 4H), 5.90 (t, *J* = 4.7 Hz, 1H), 4.20 (s, 2H), 2.69 (t, *J* = 8.1 Hz, 2H), 2.38 (s, 3H), 2.28 – 2.17 (m, 2H).

**<sup>13</sup>C NMR (101 MHz, CDCl<sub>3</sub>):** δ 144.5, 135.9, 135.3, 134.8, 132.6, 129.4, 128.7, 127.5, 127.2, 126.3, 125.8, 123.1, 59.9, 27.7, 23.3, 21.5.

**HRMS (m/z, ESI-TOF):** Calcd for C<sub>18</sub>H<sub>18</sub>SO<sub>2</sub>Na<sup>+</sup> [M+Na<sup>+</sup>] 321.0920, found 321.0925.

## 5. NMR Spectra of Compounds

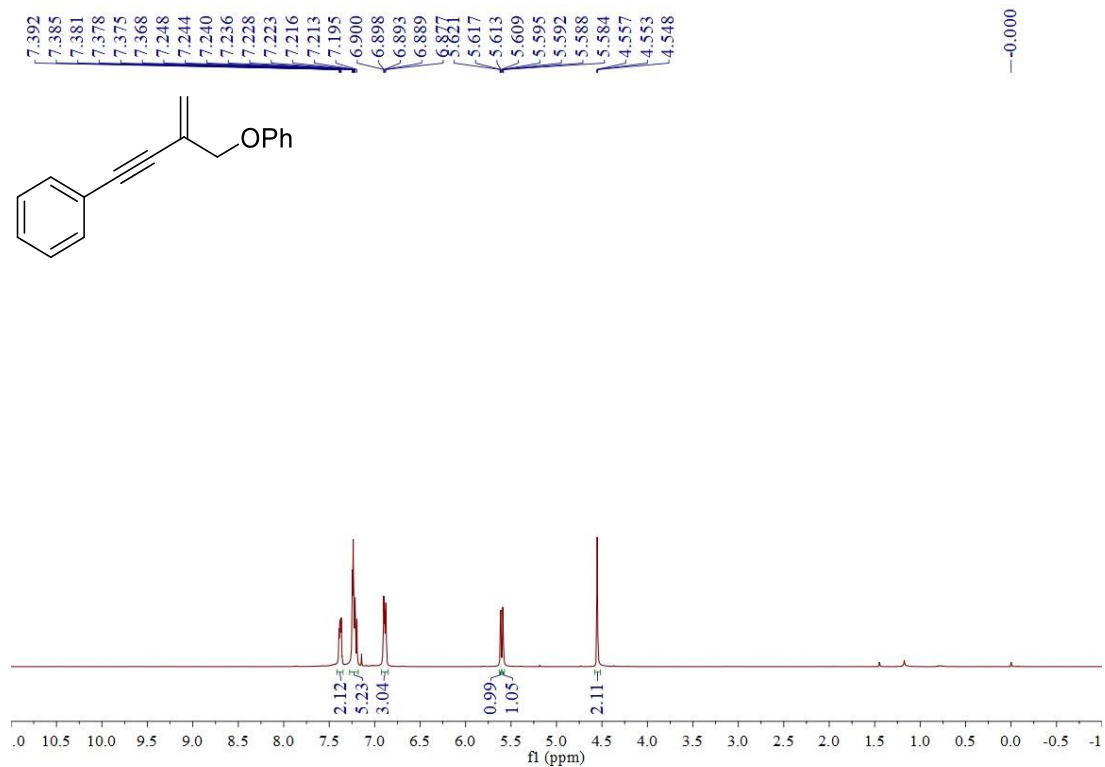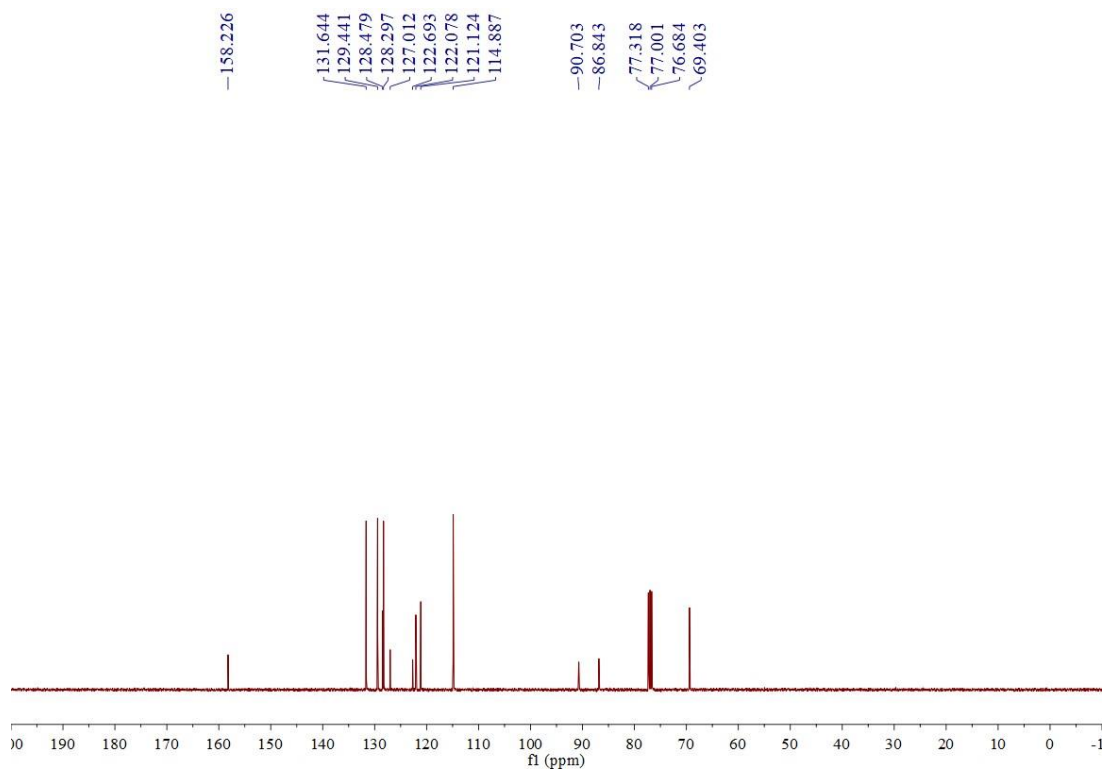

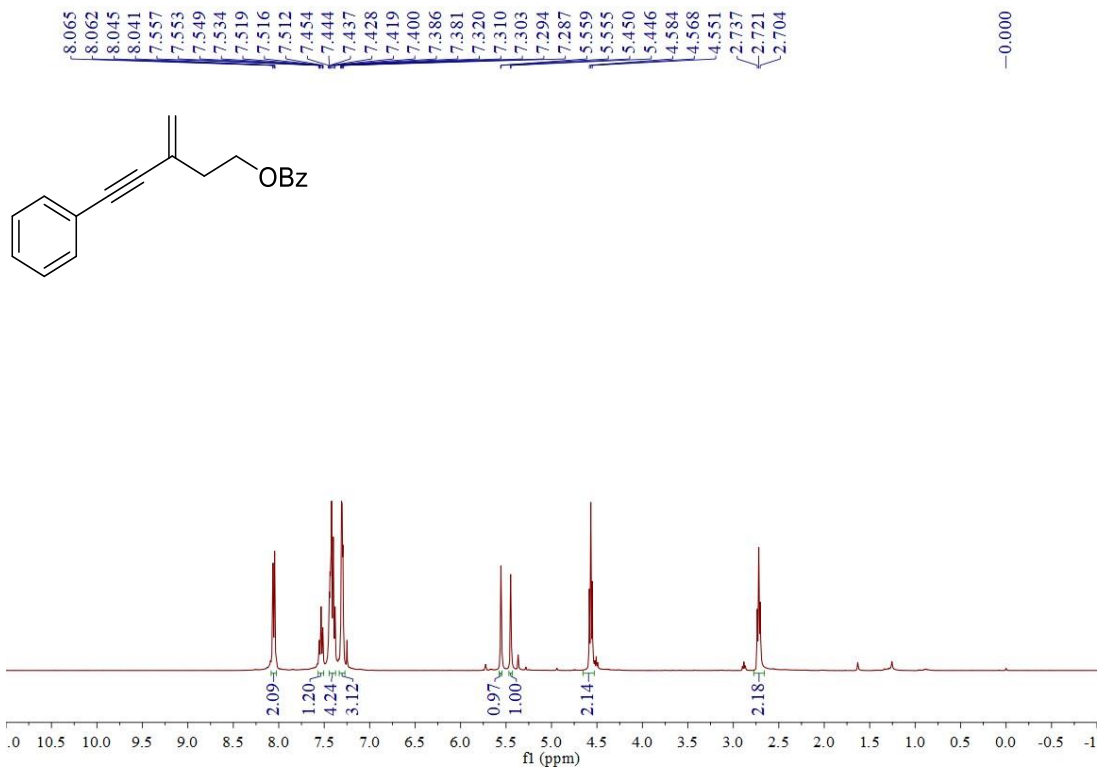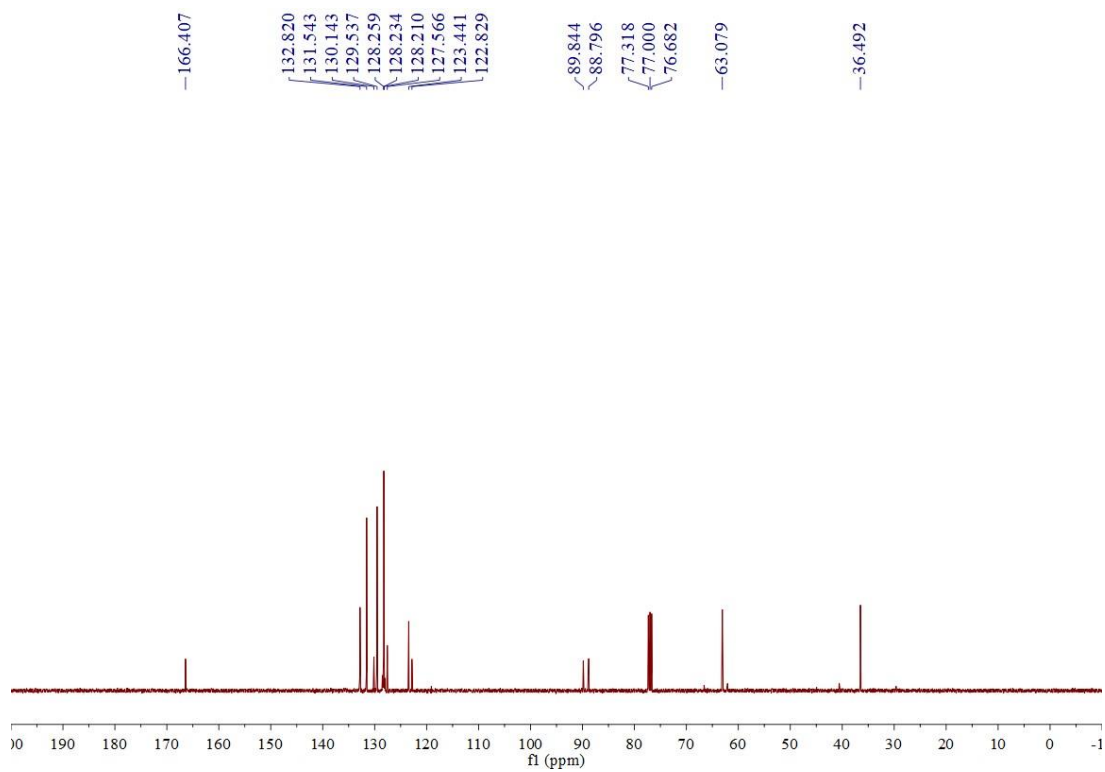

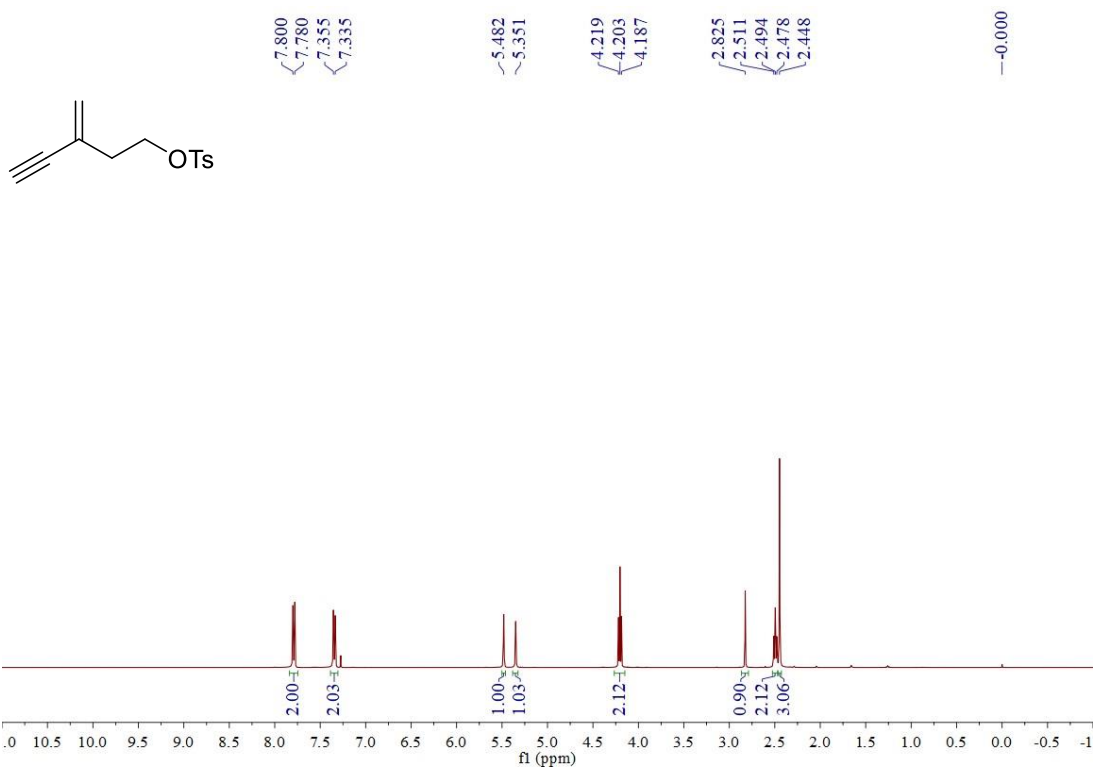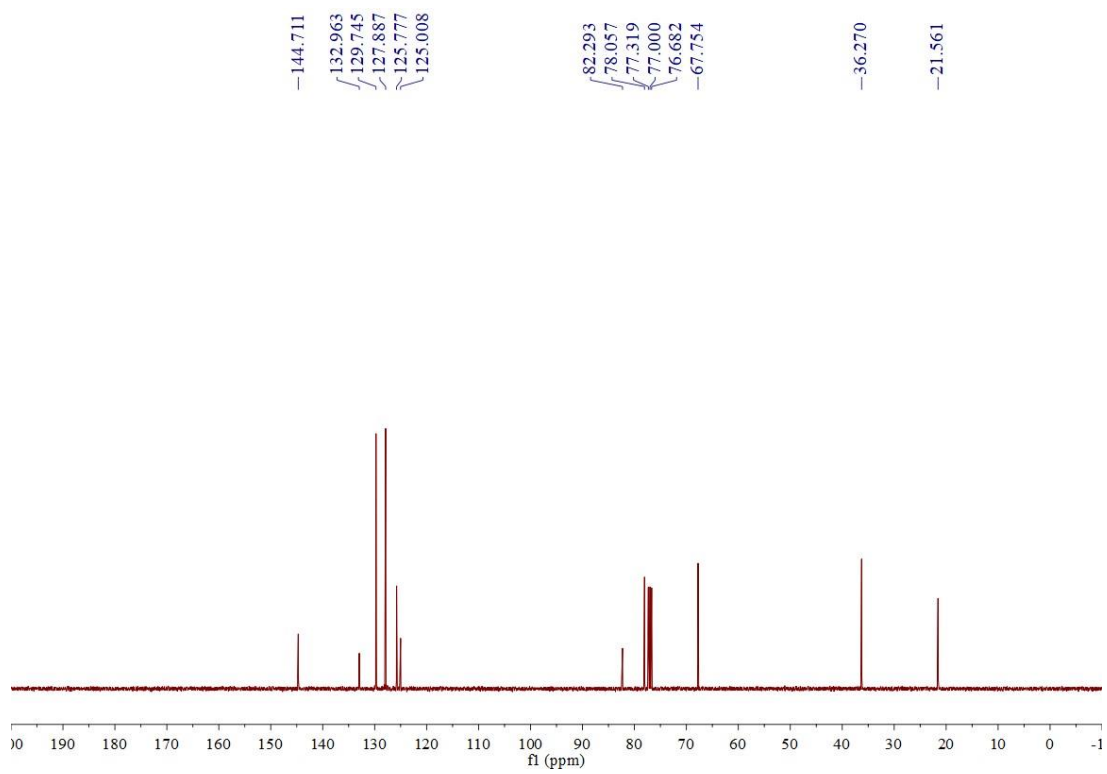

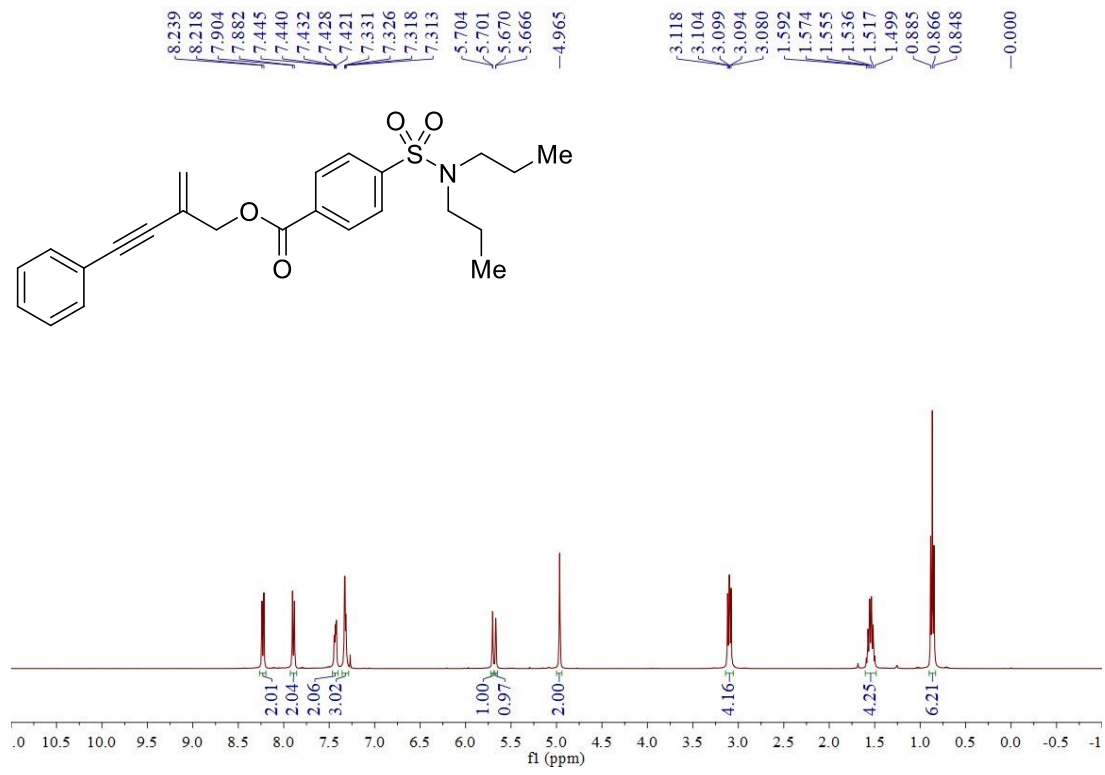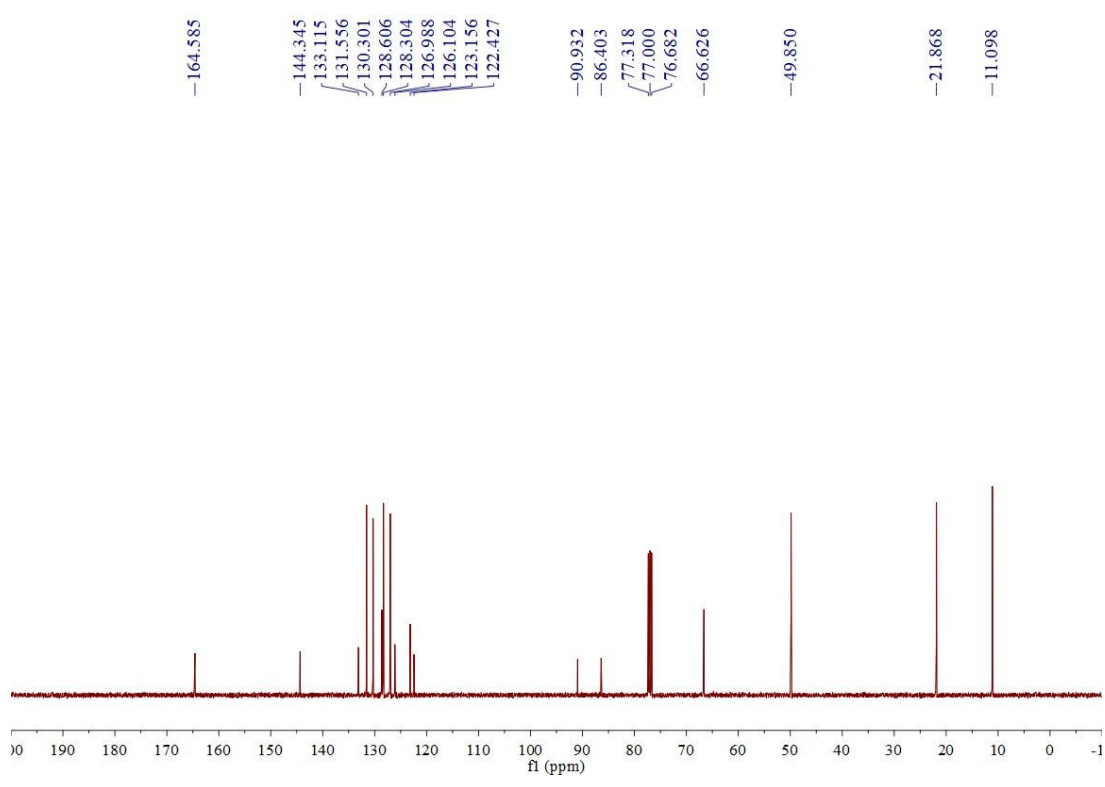



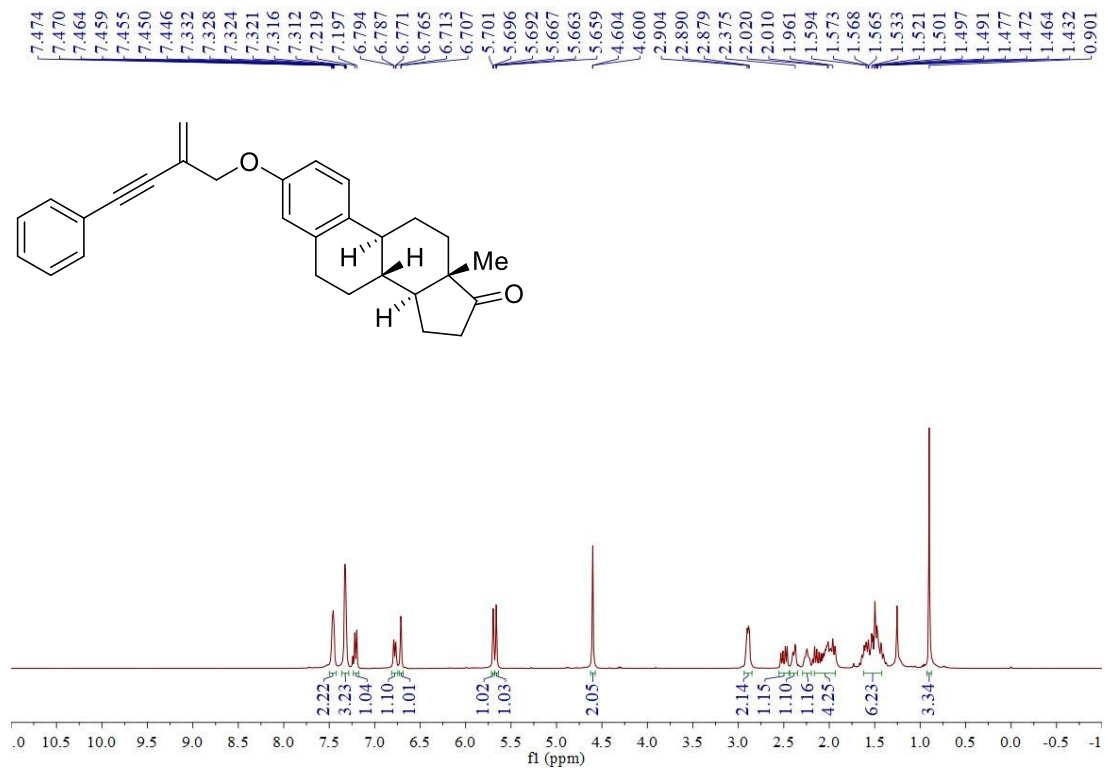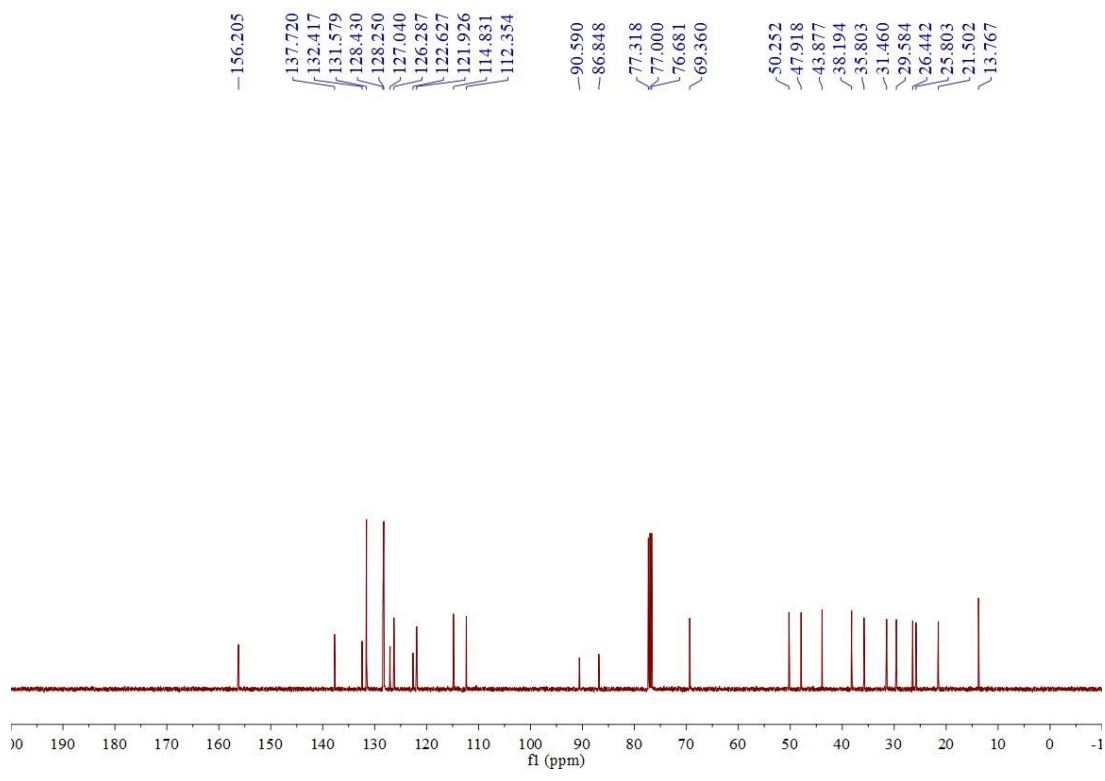

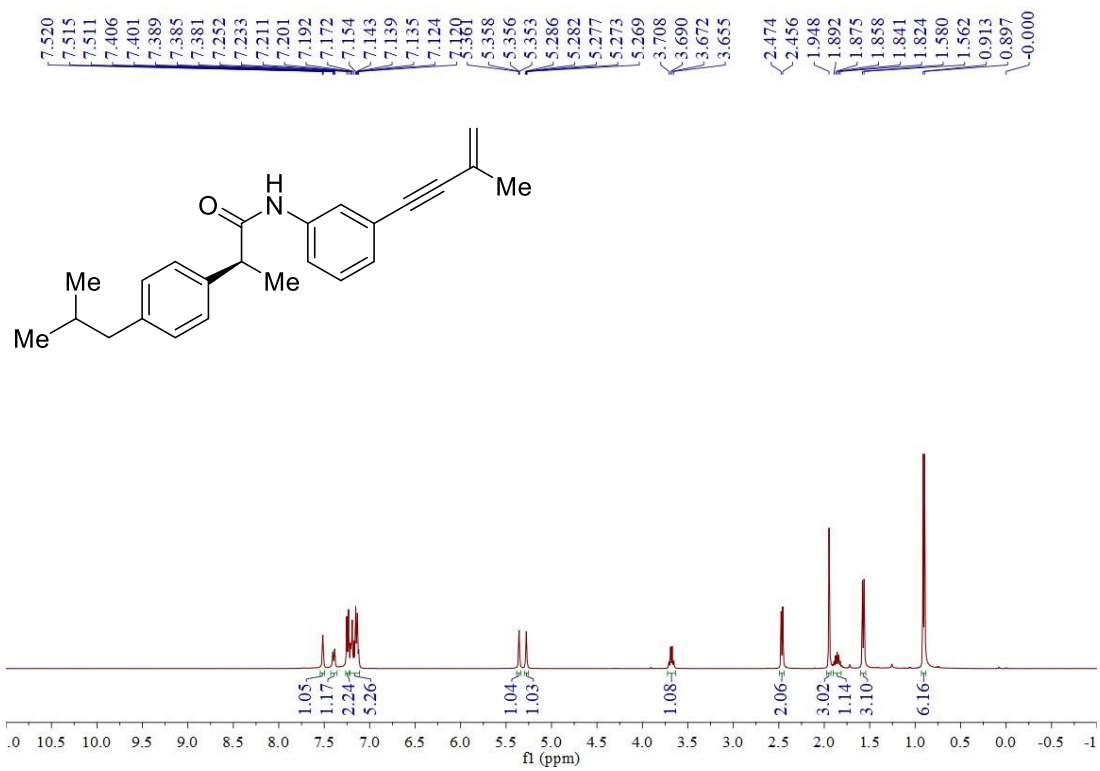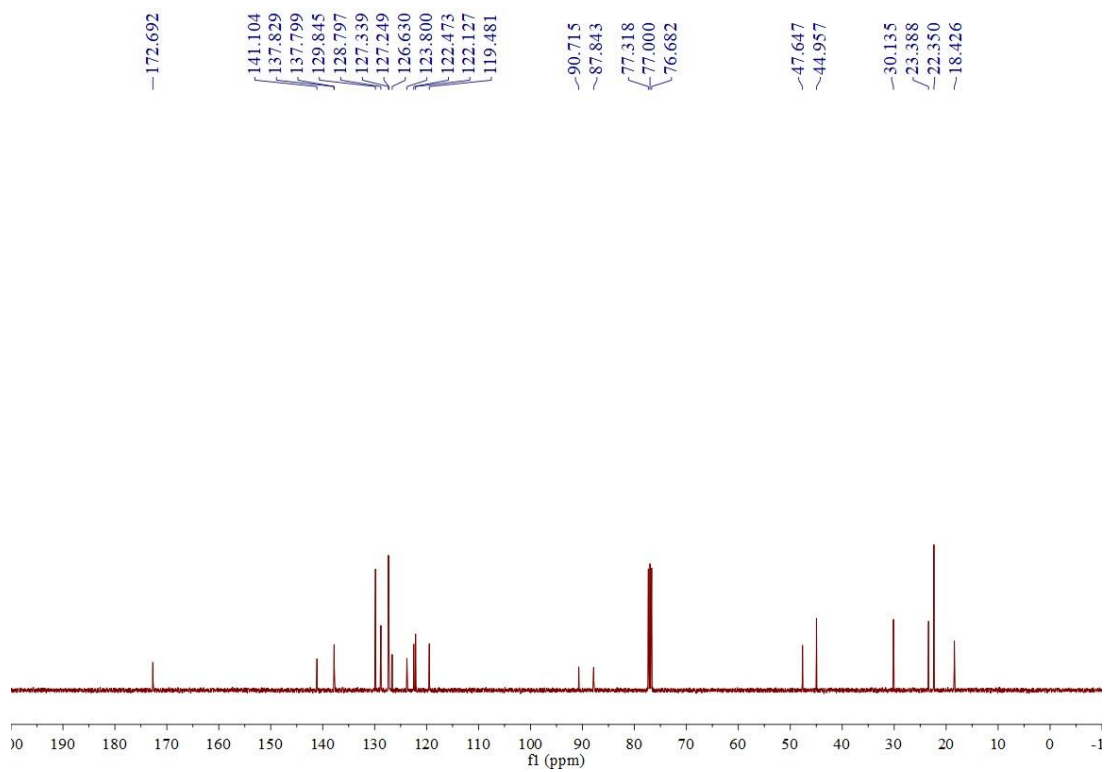

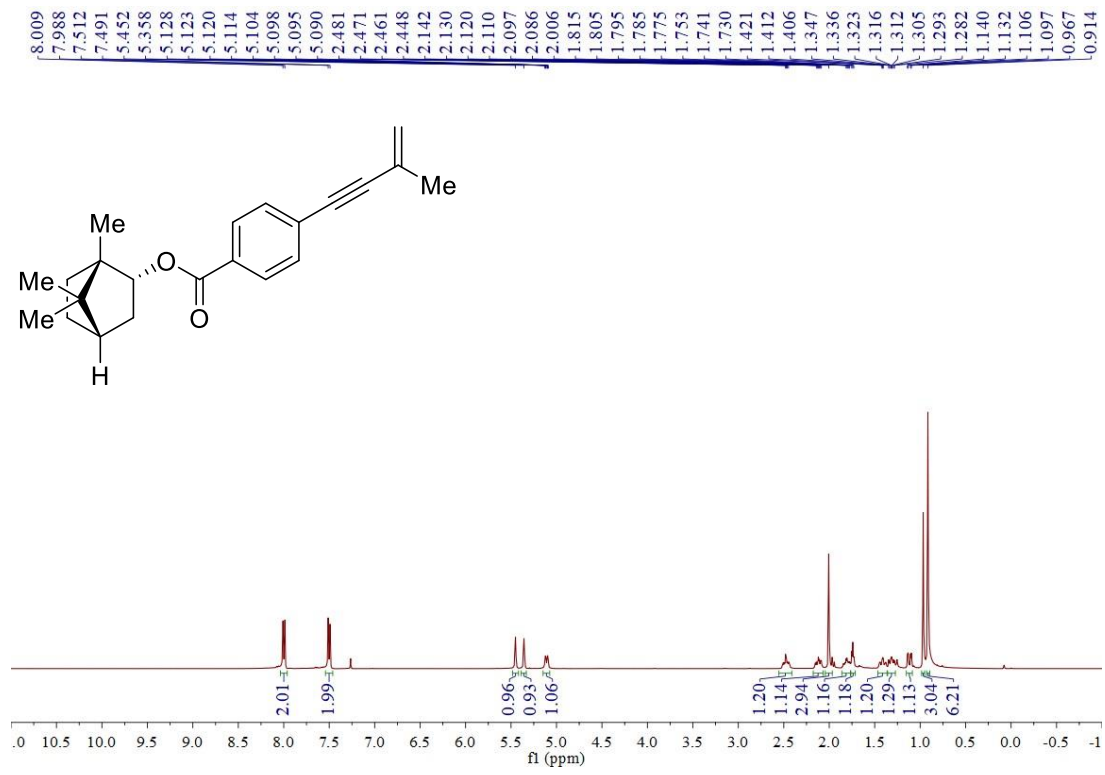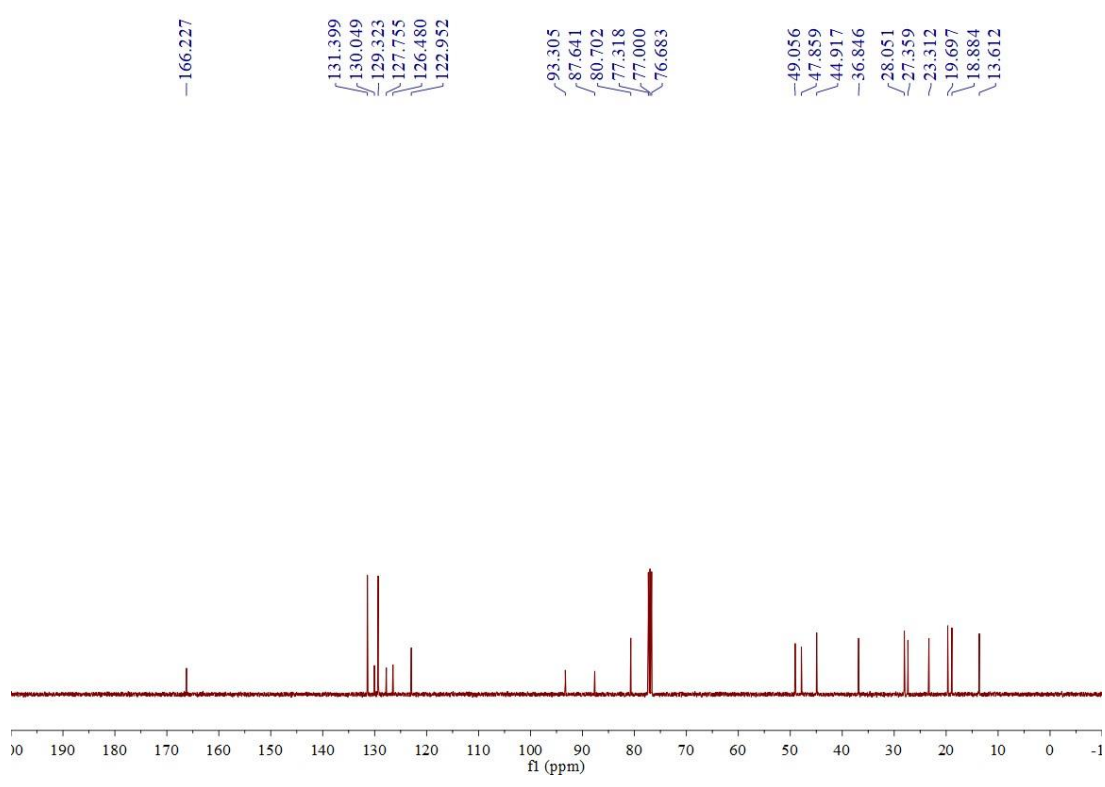

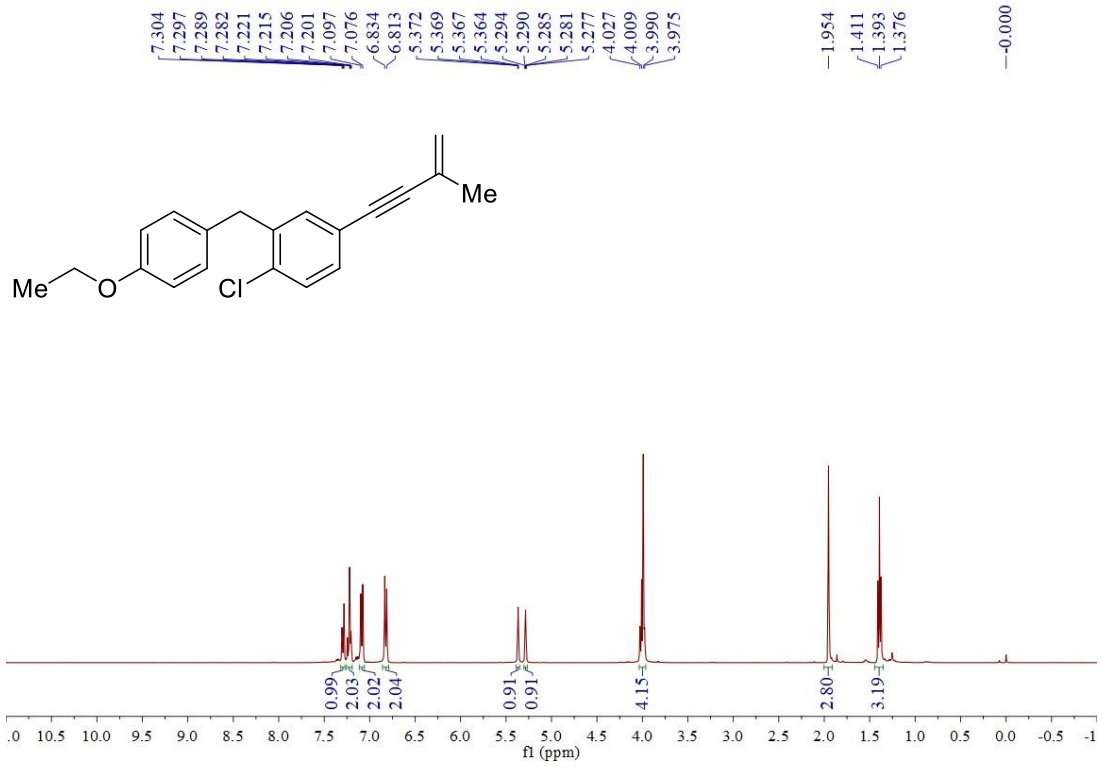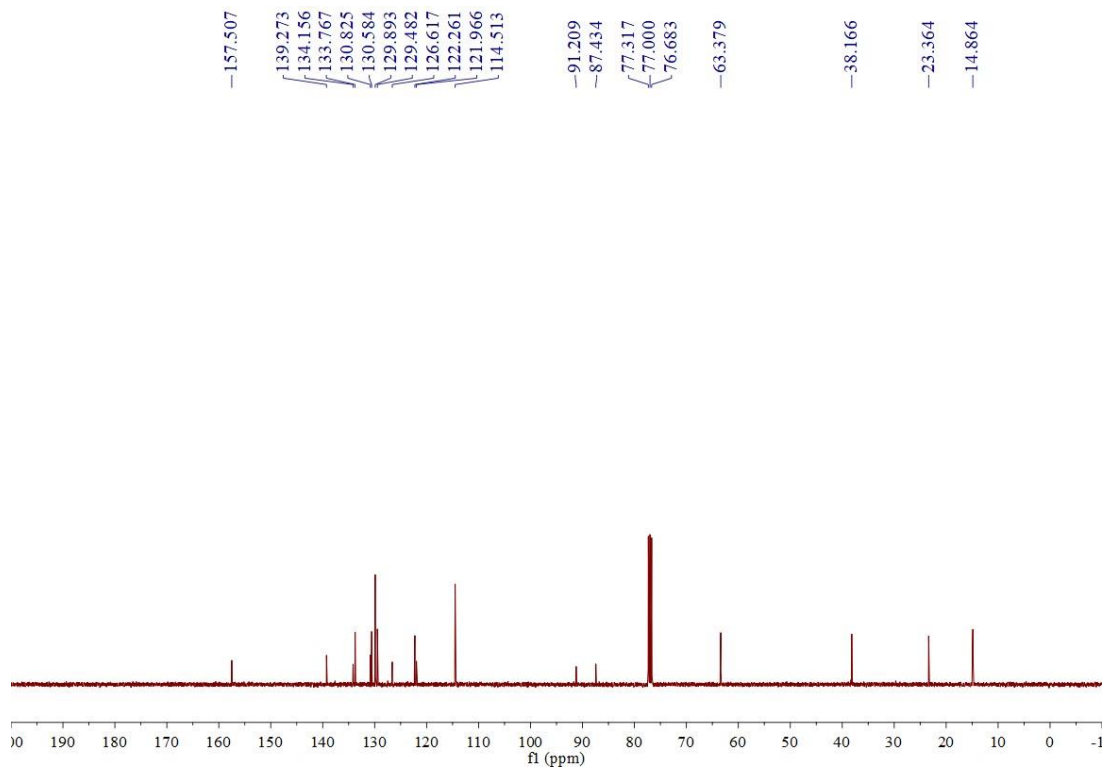

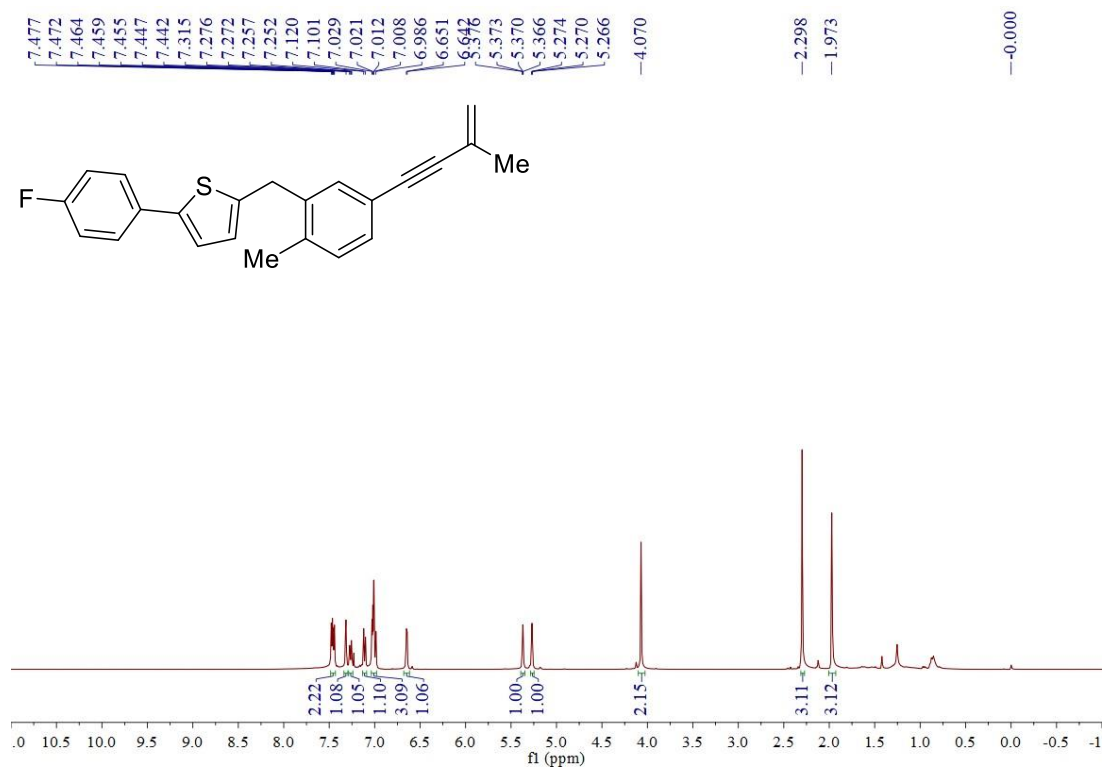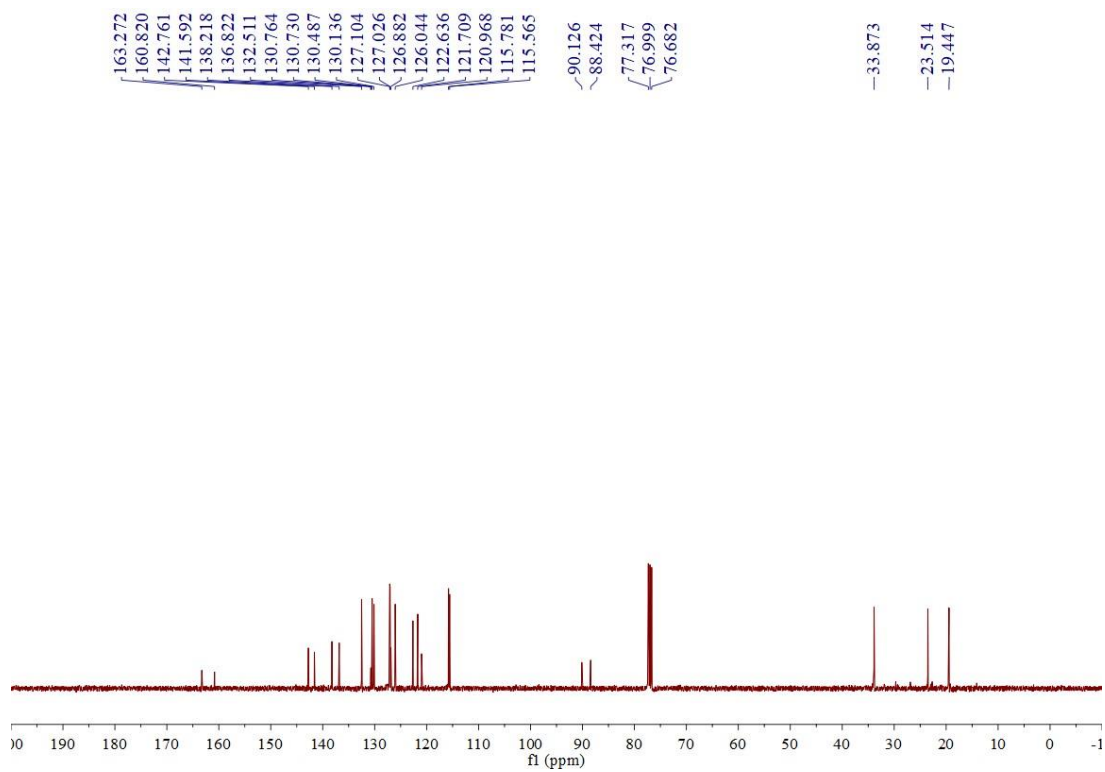

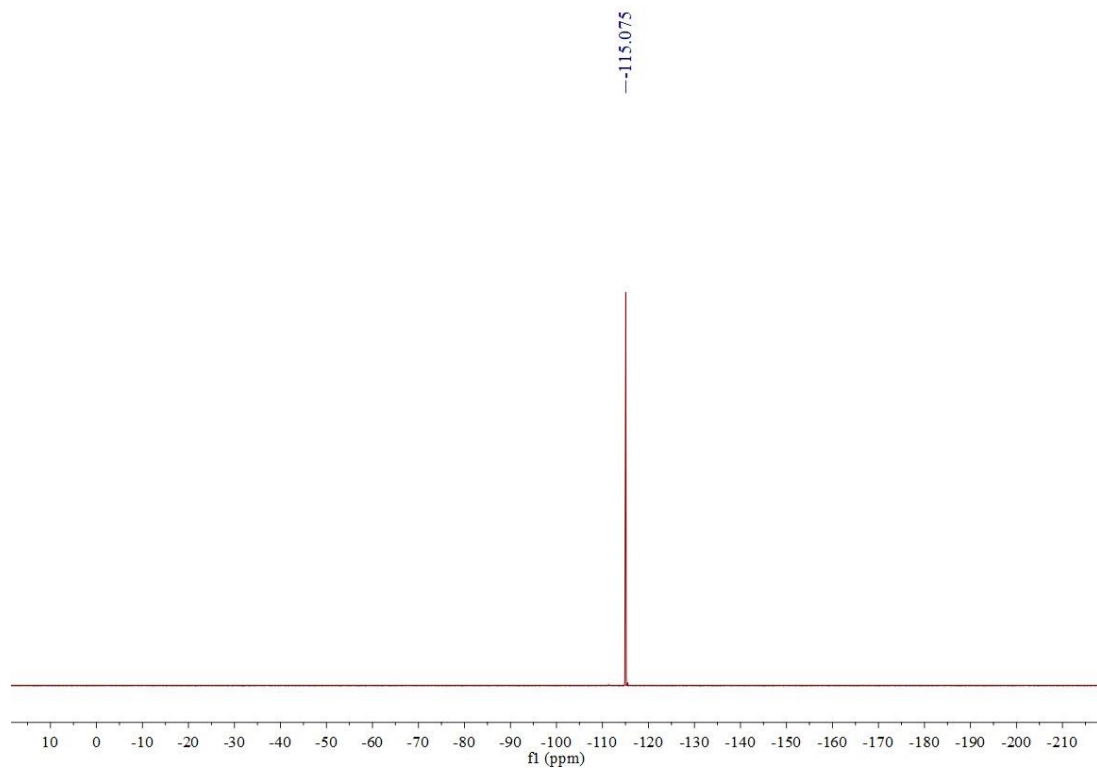

4

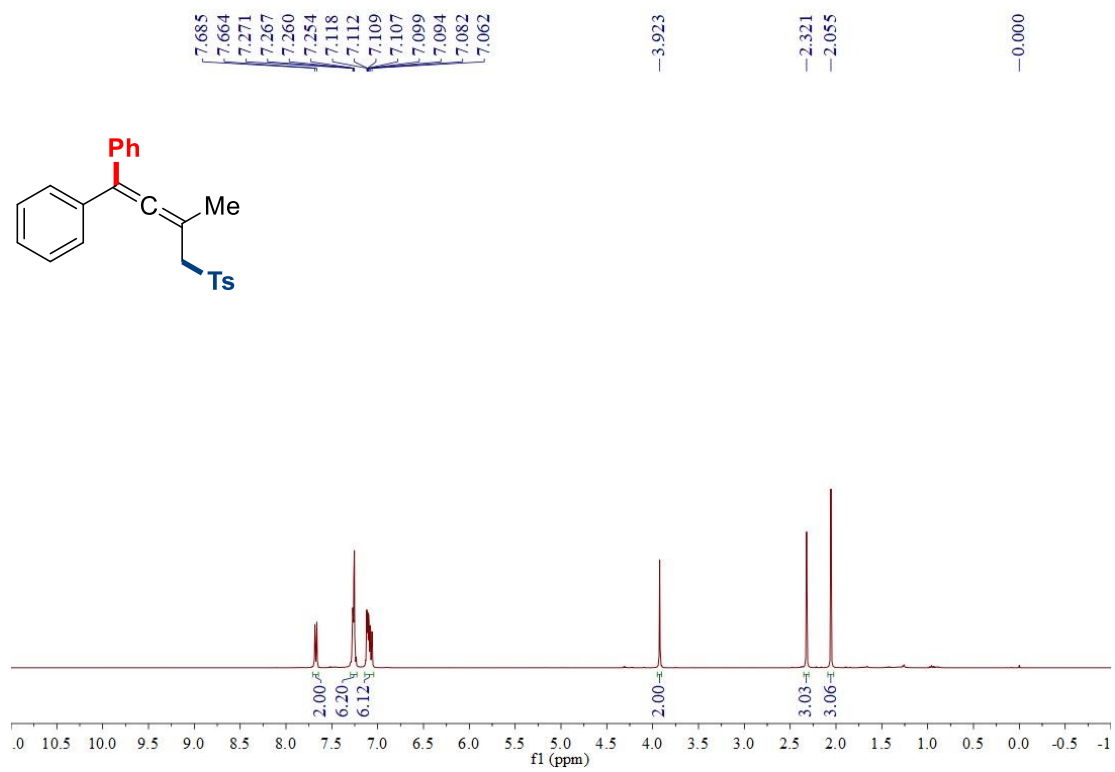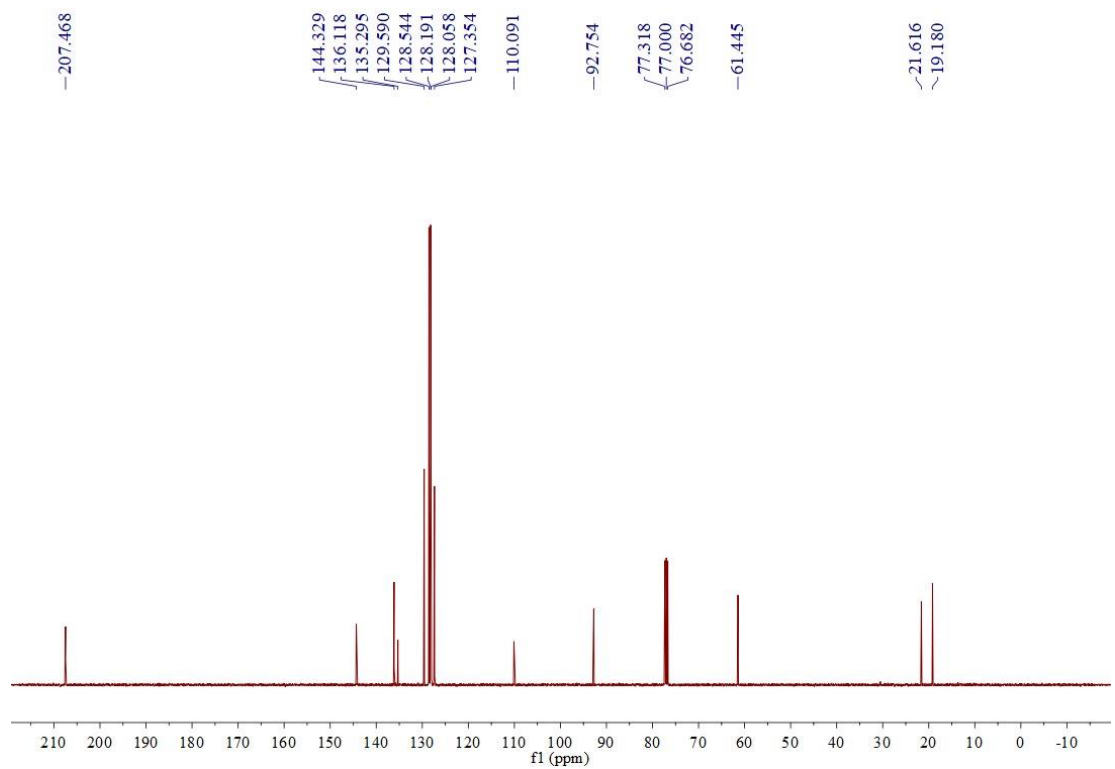

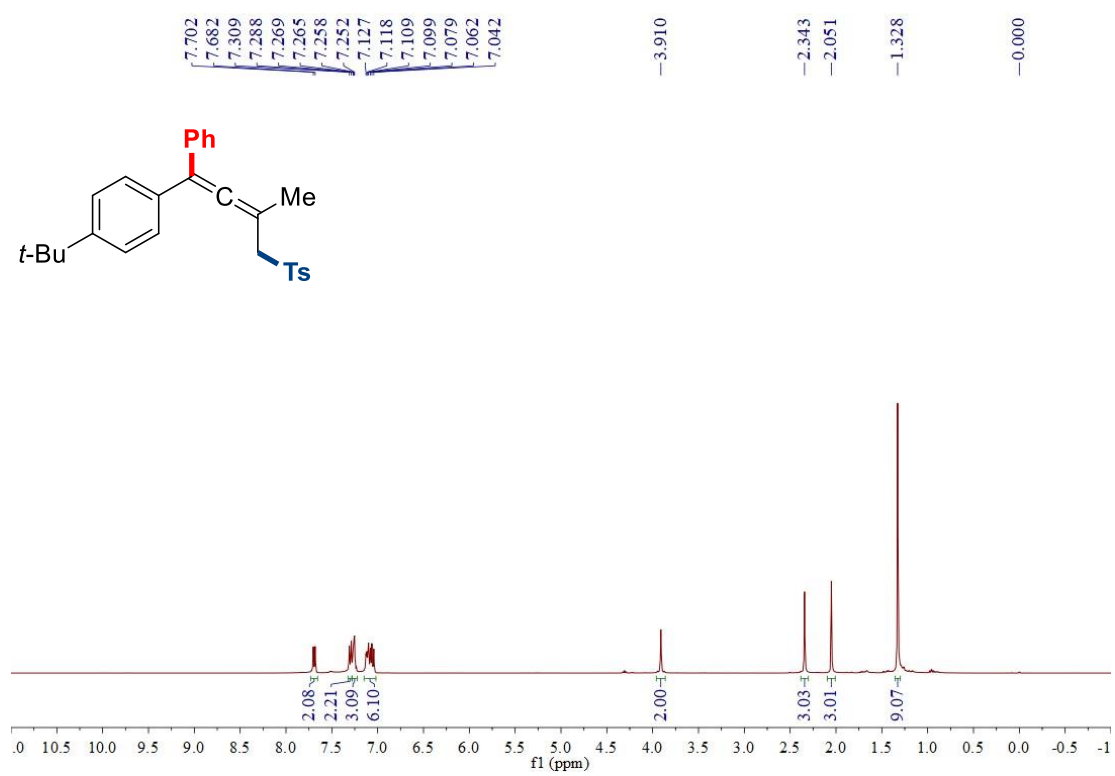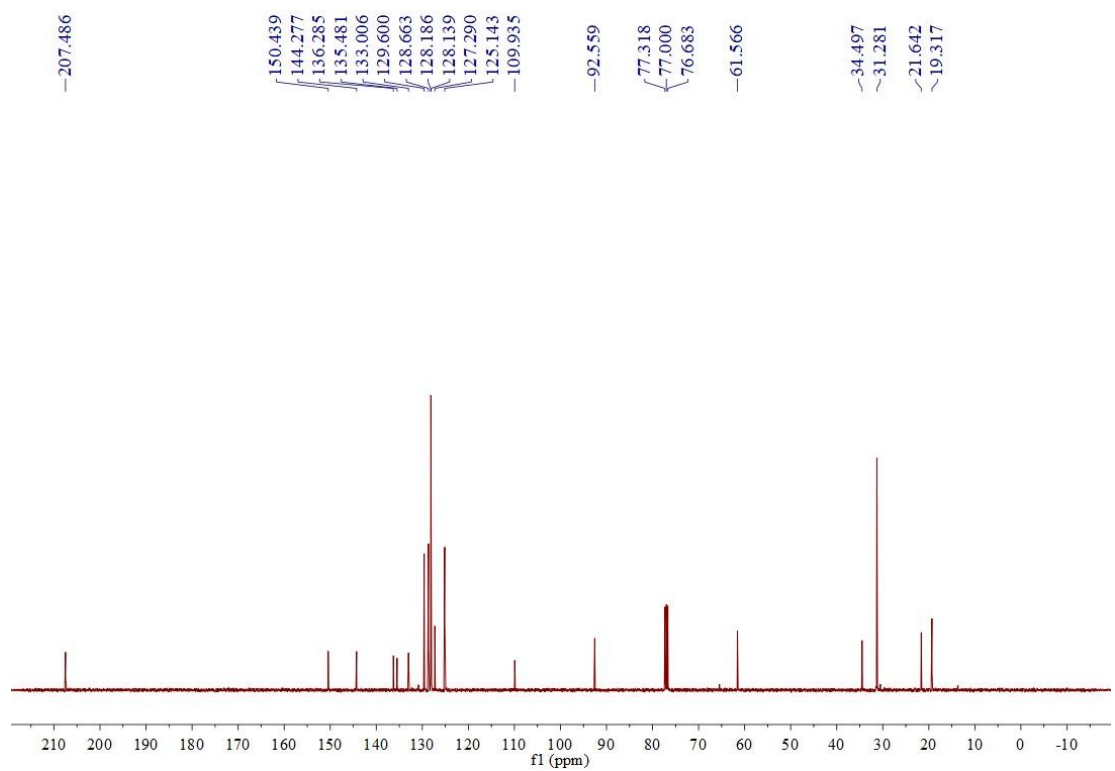



6

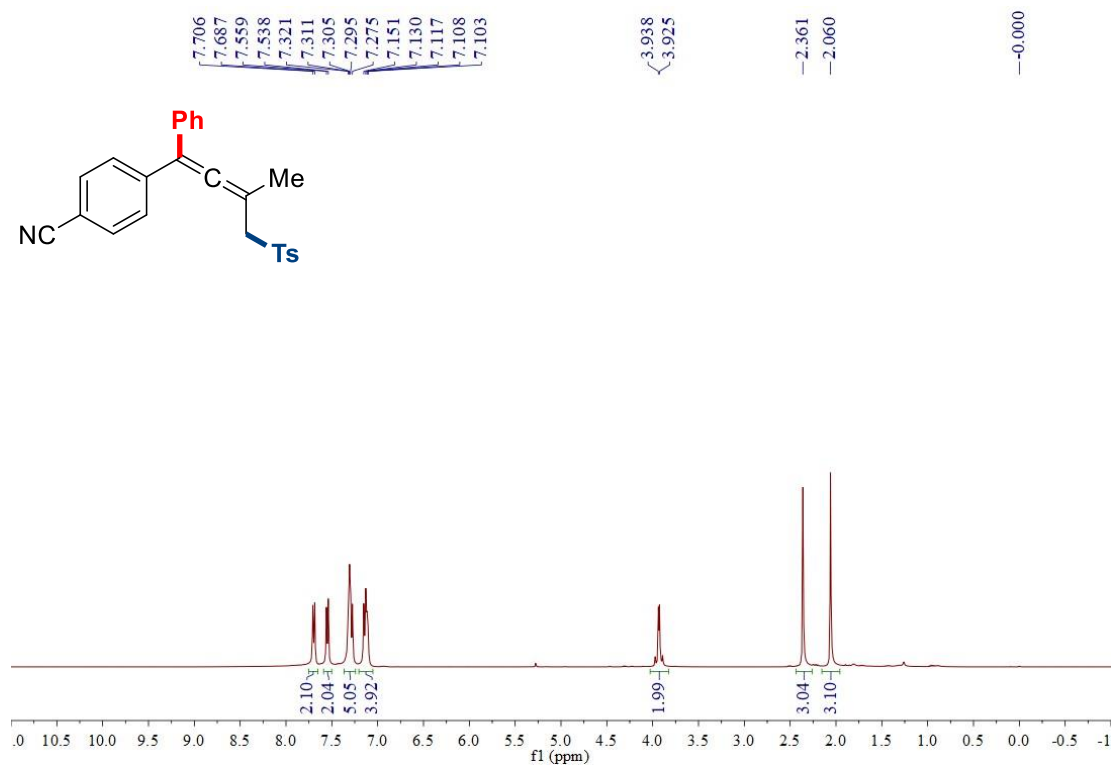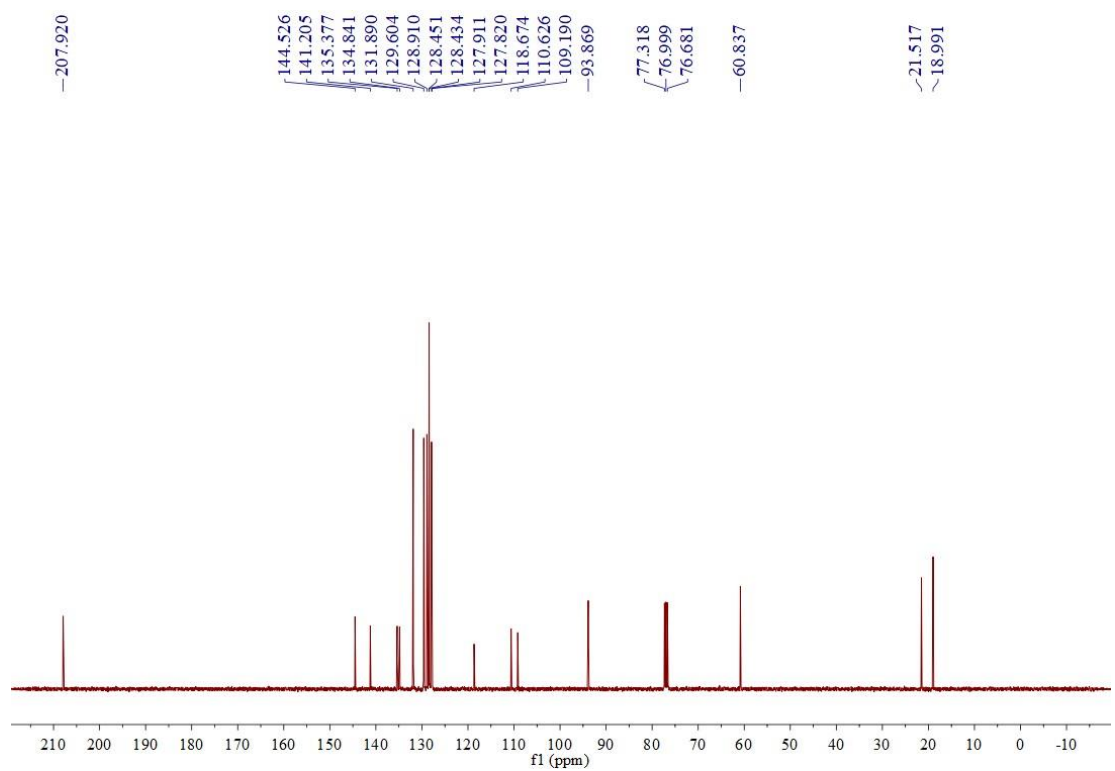

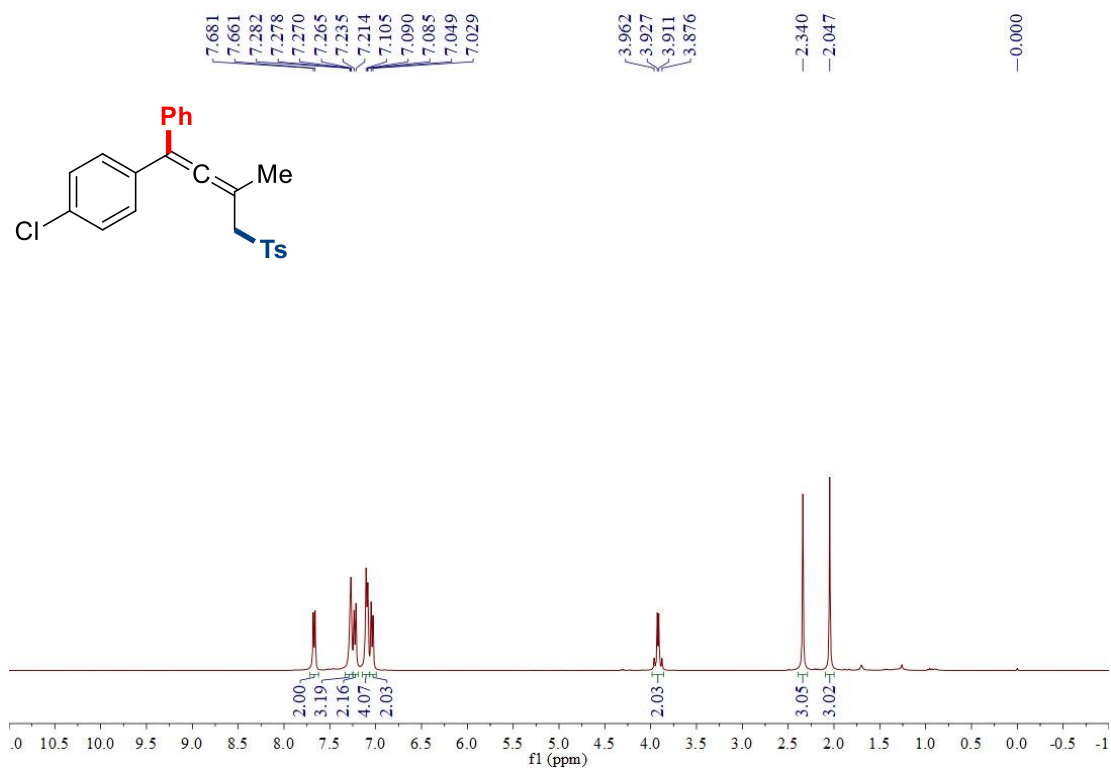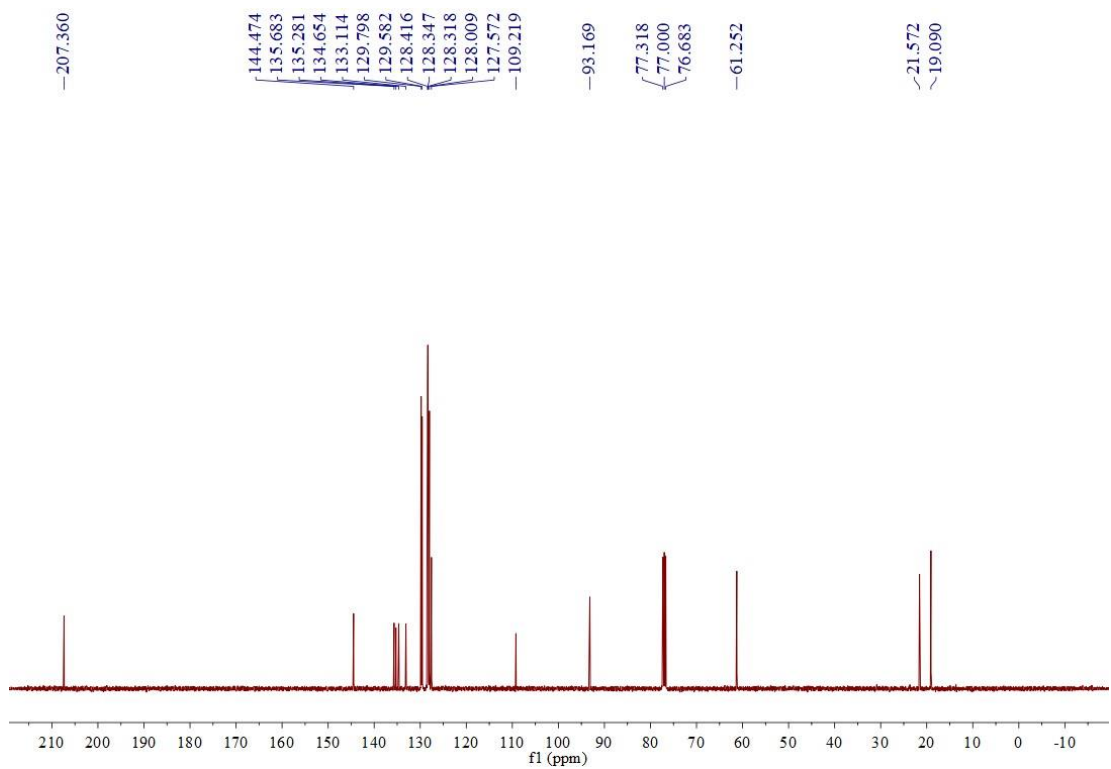

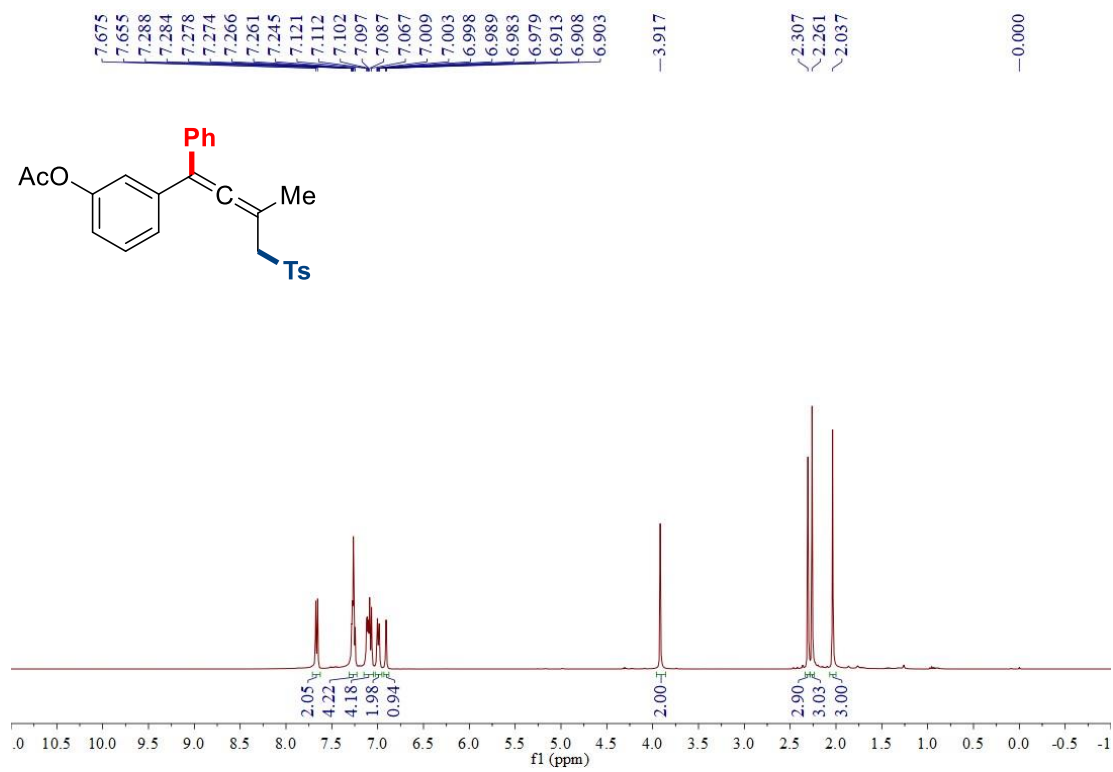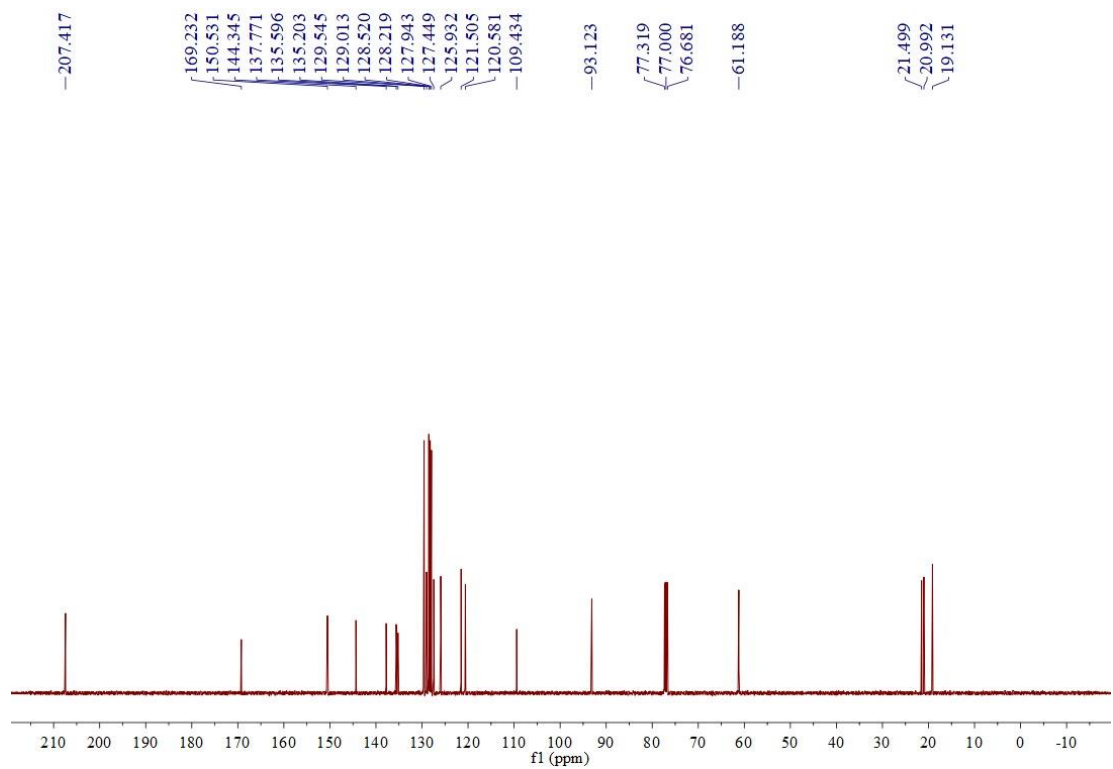

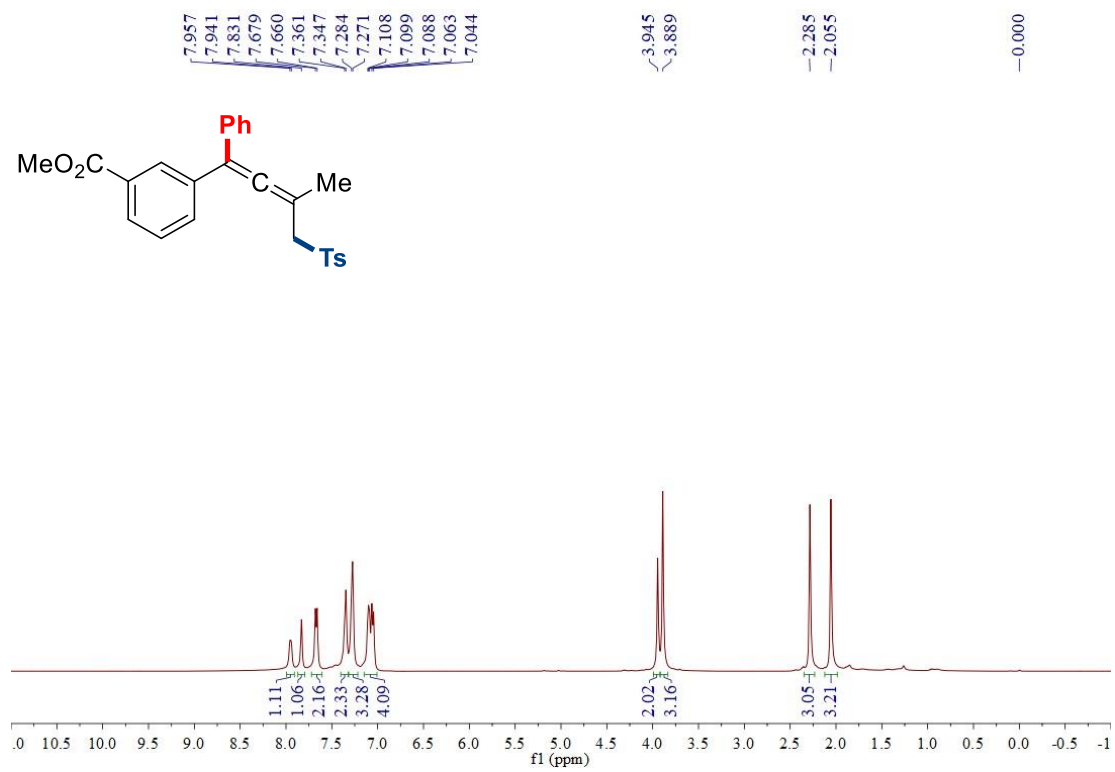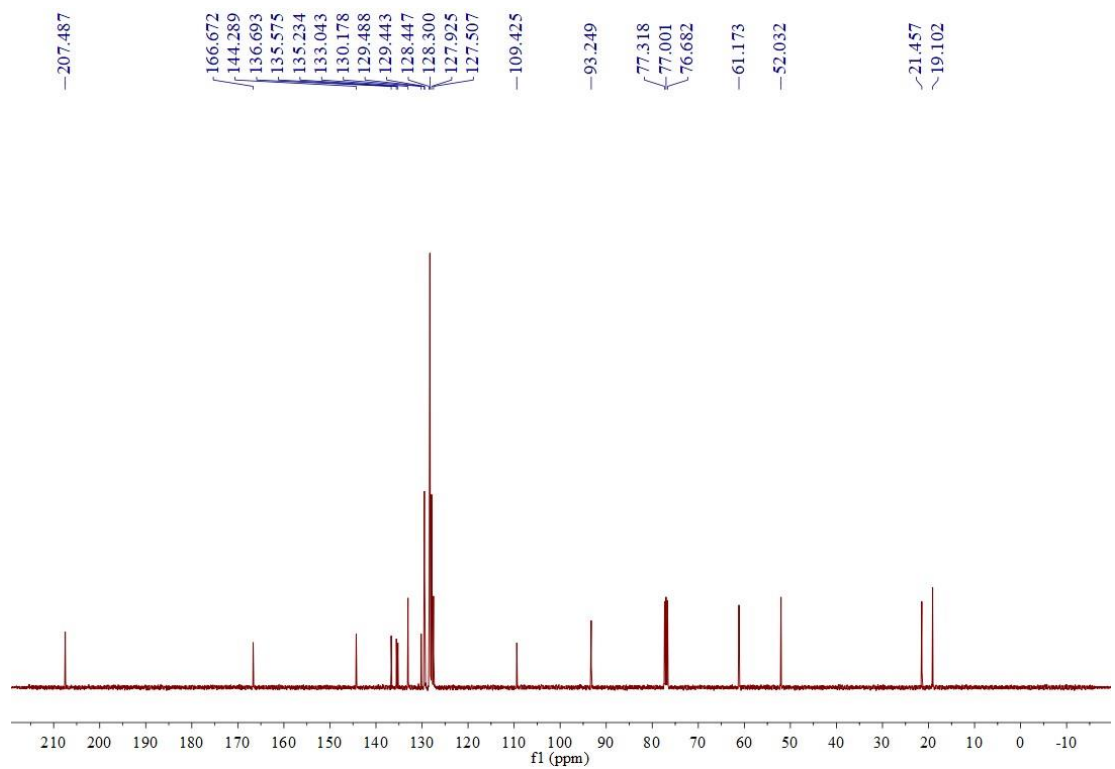

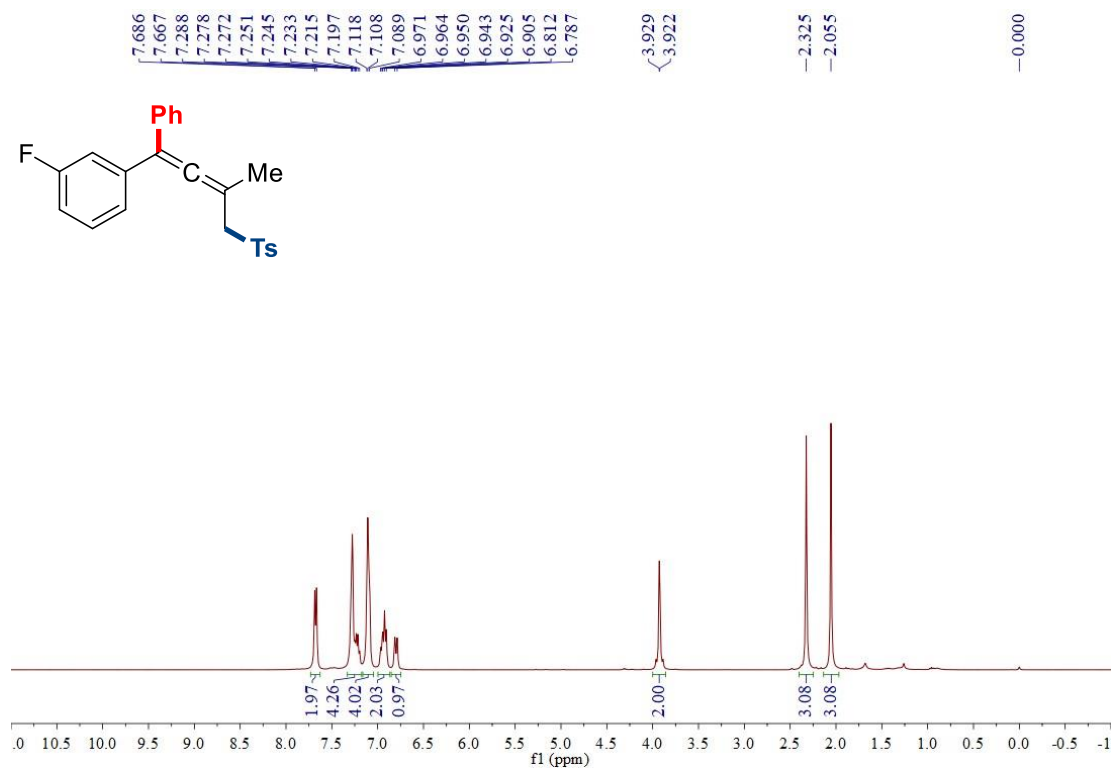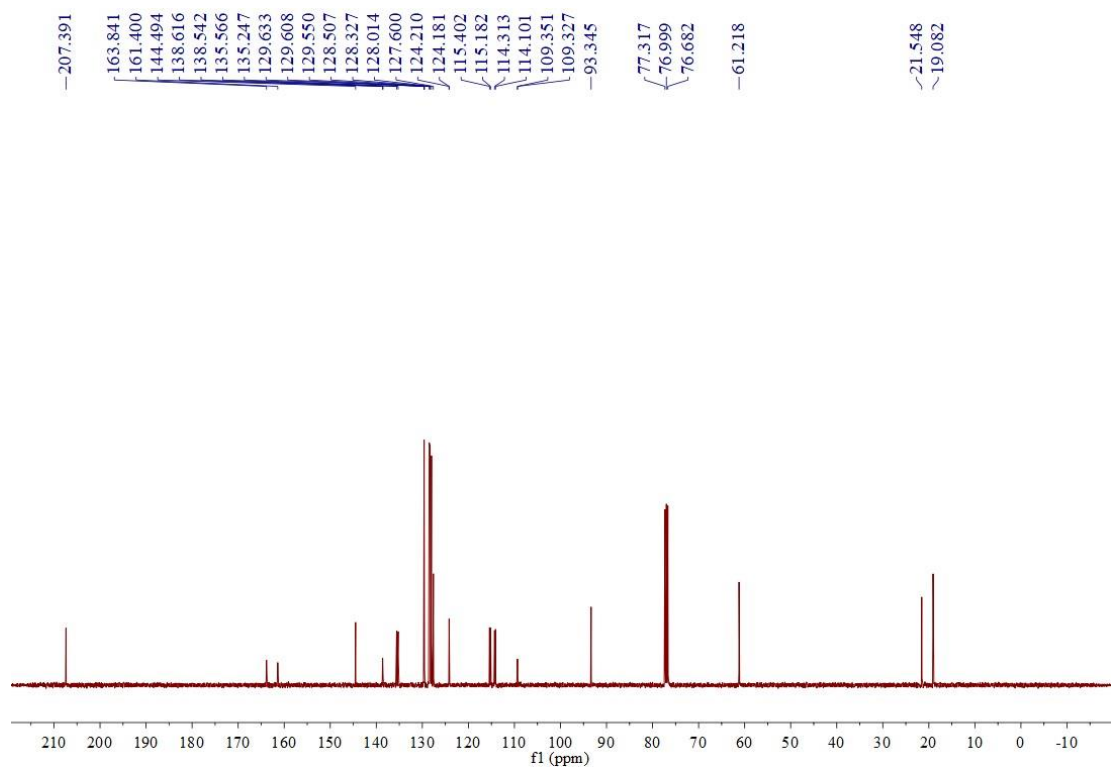

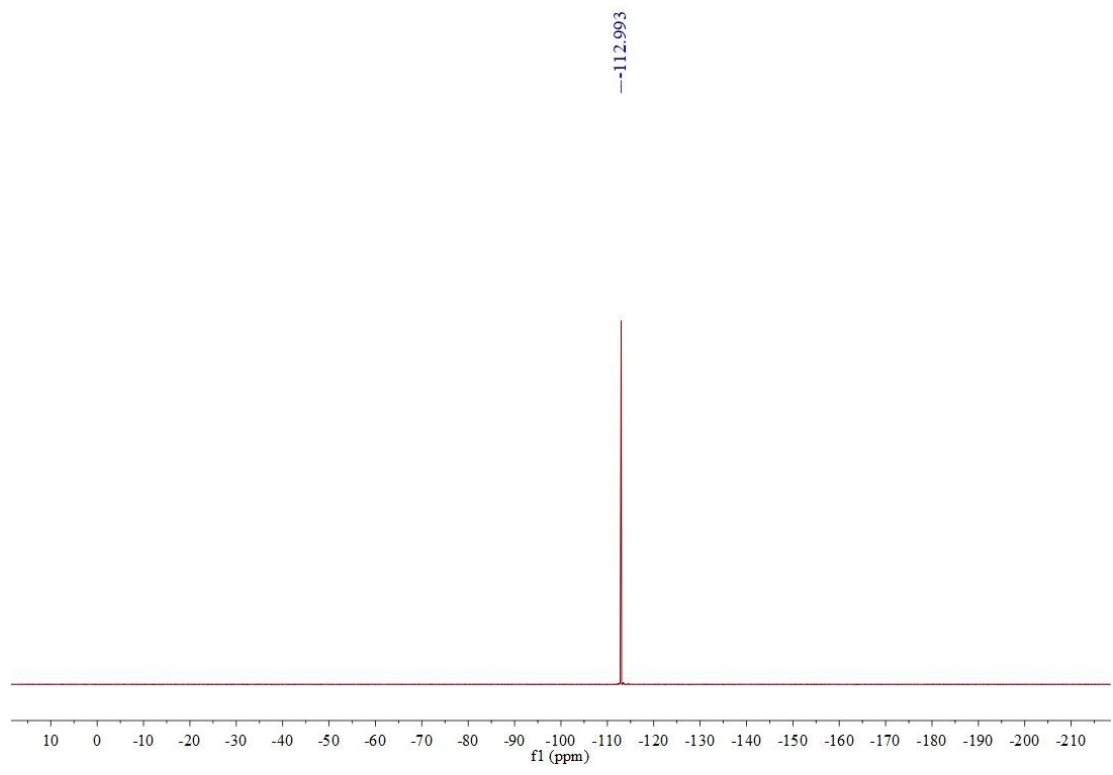

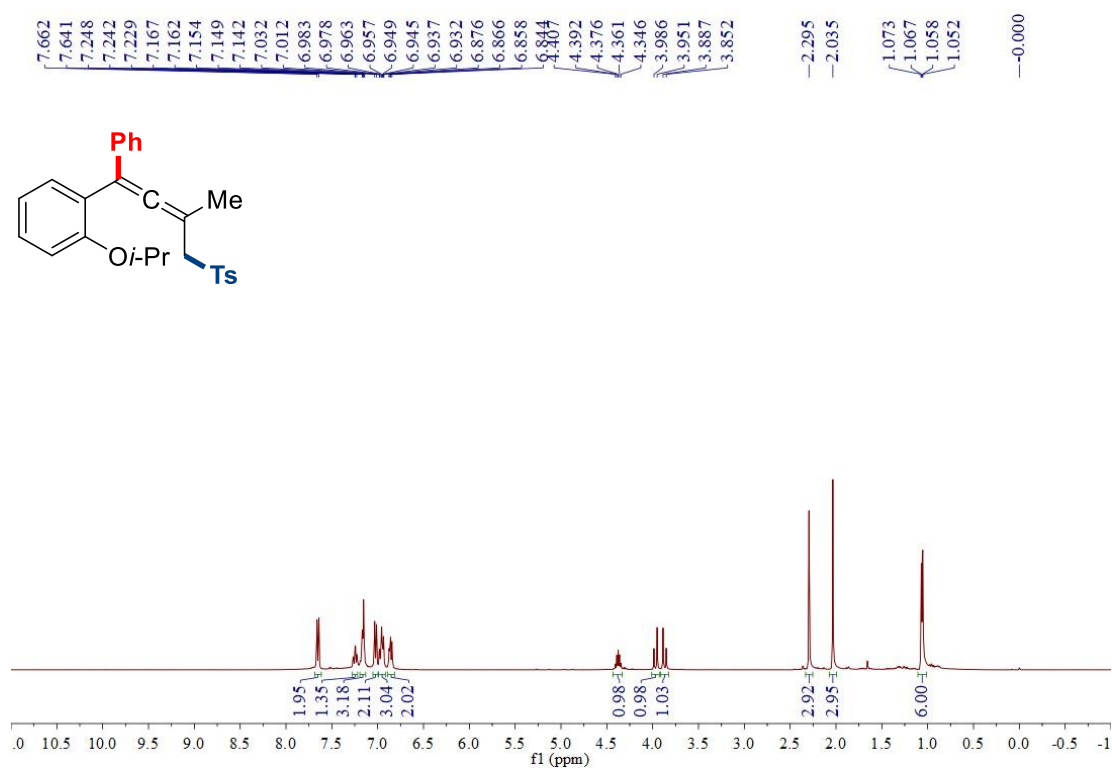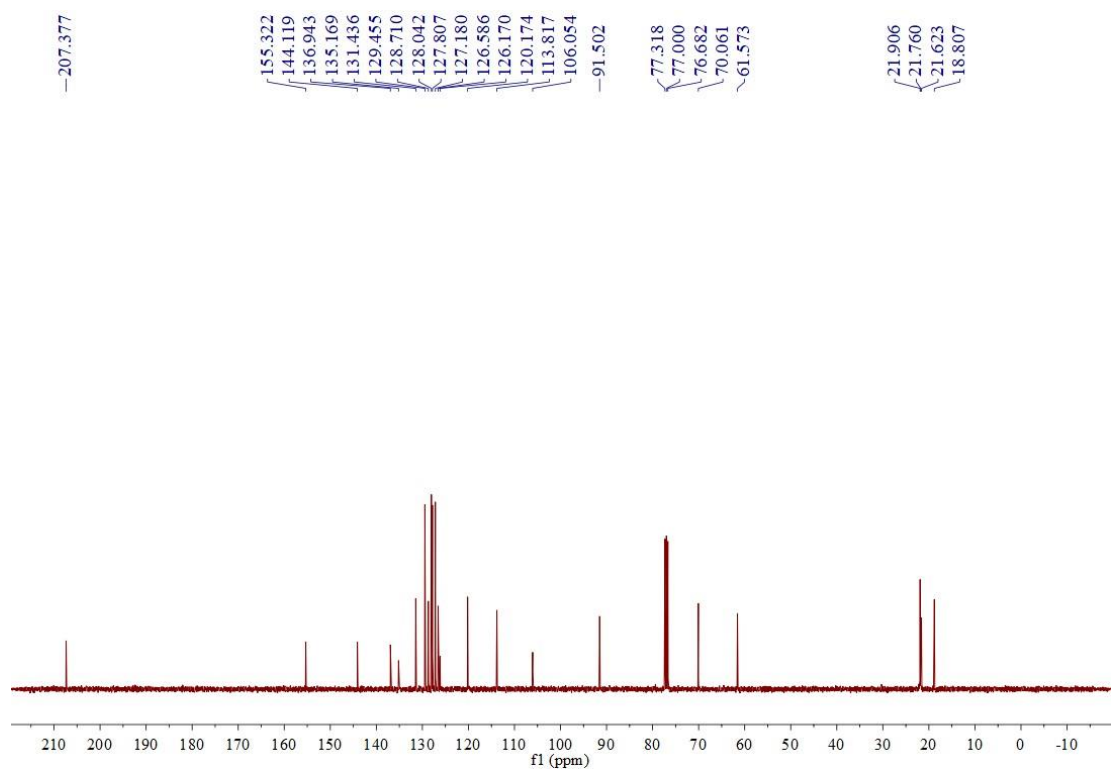

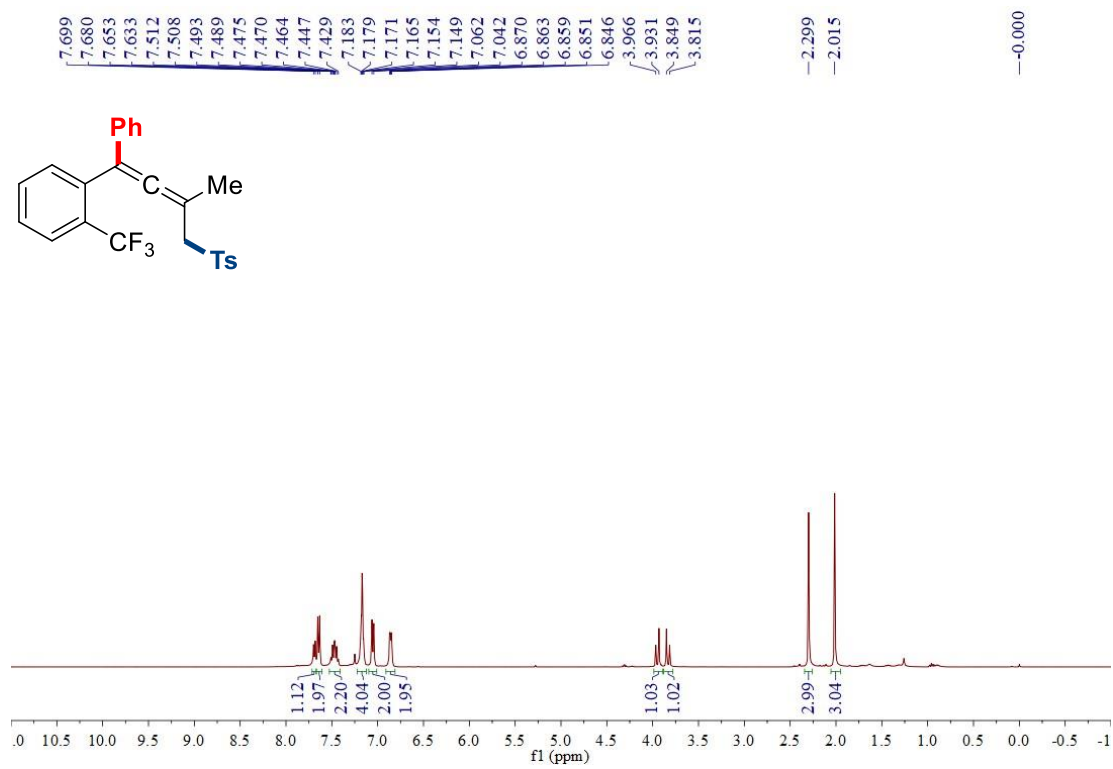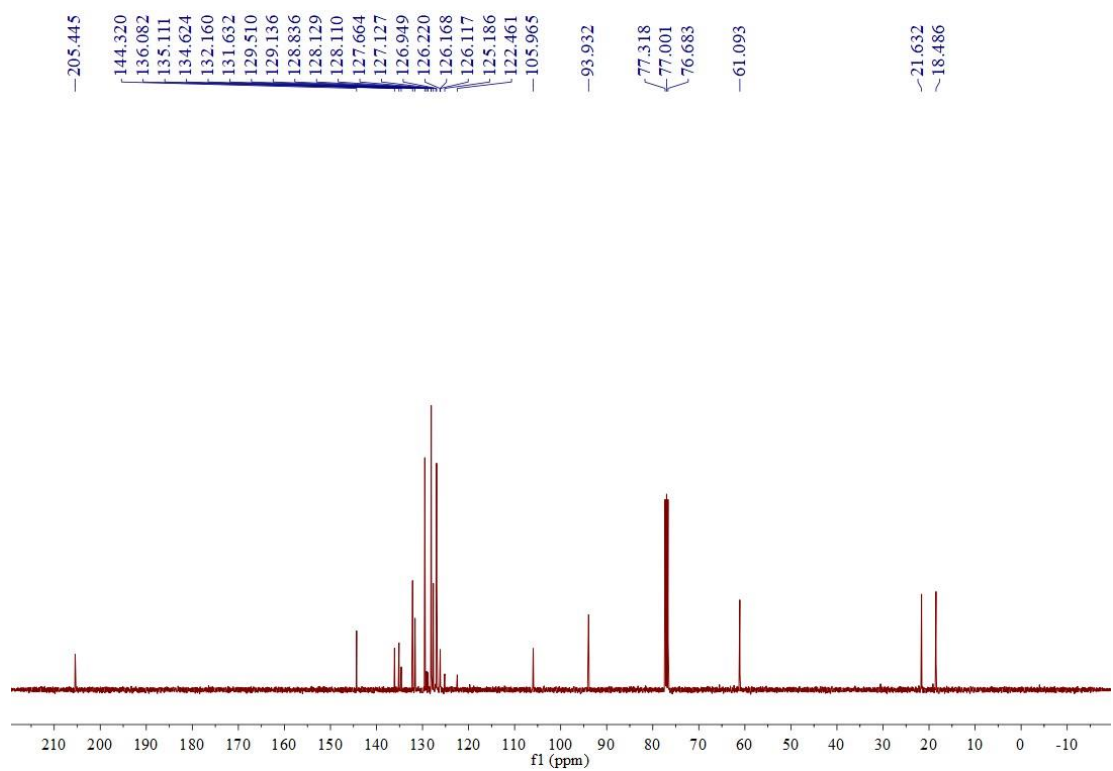



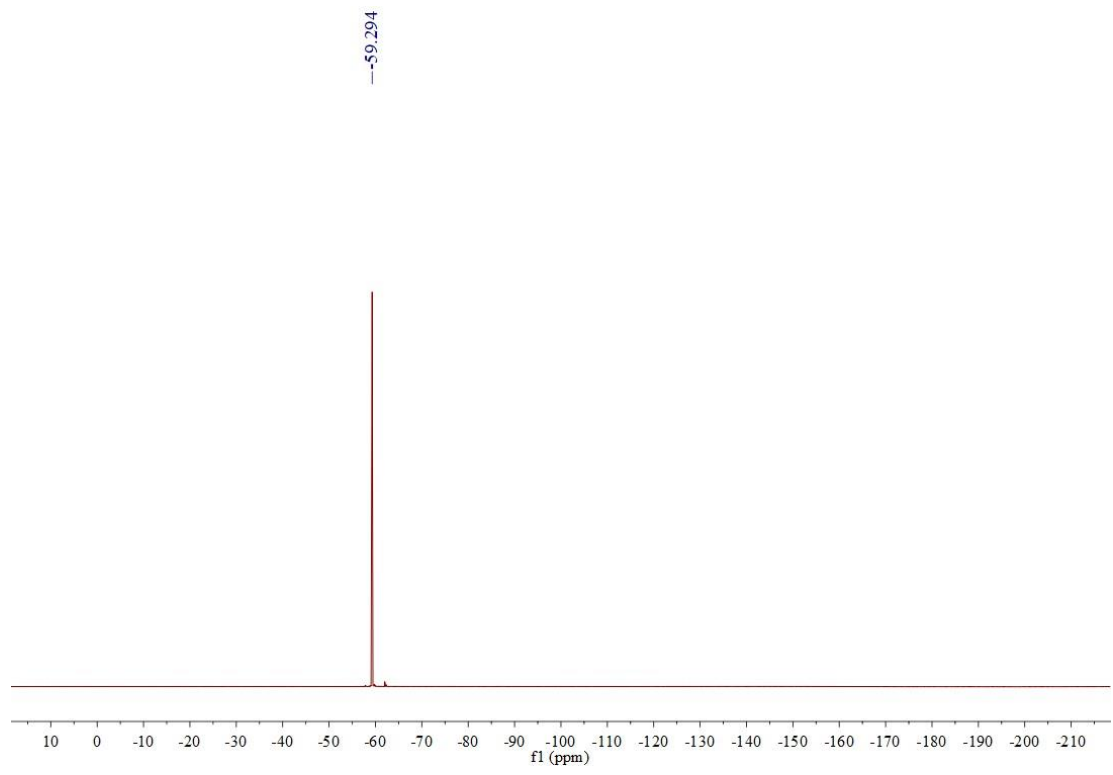

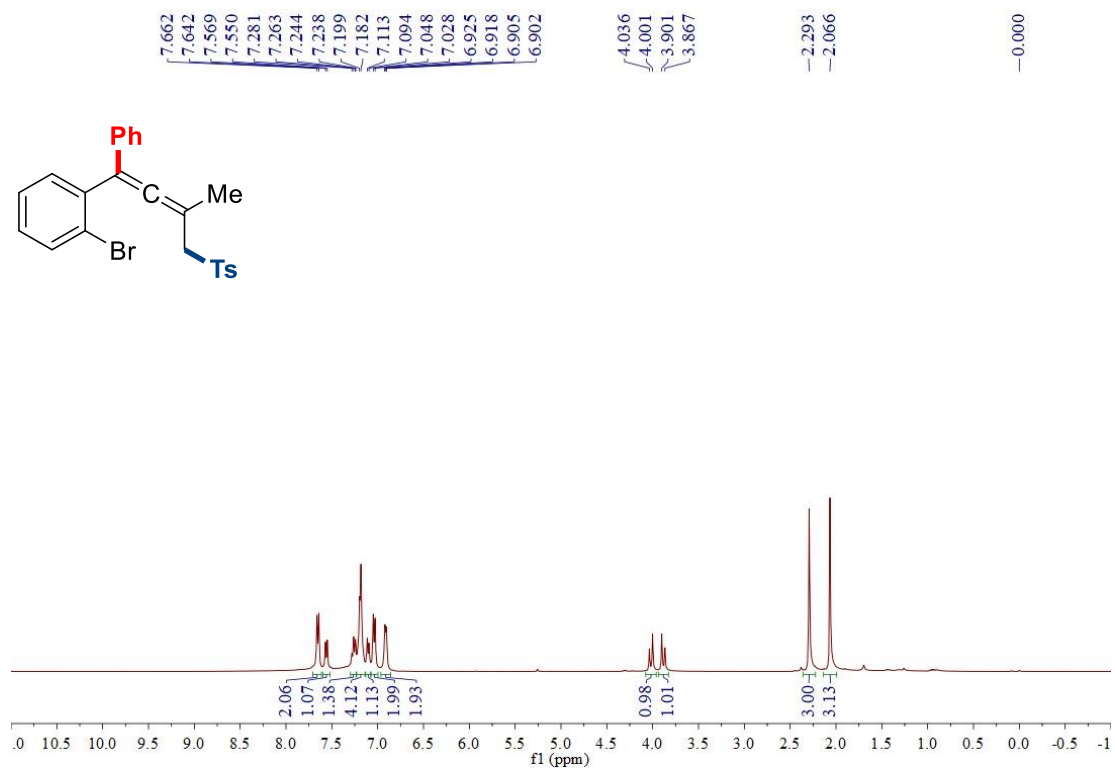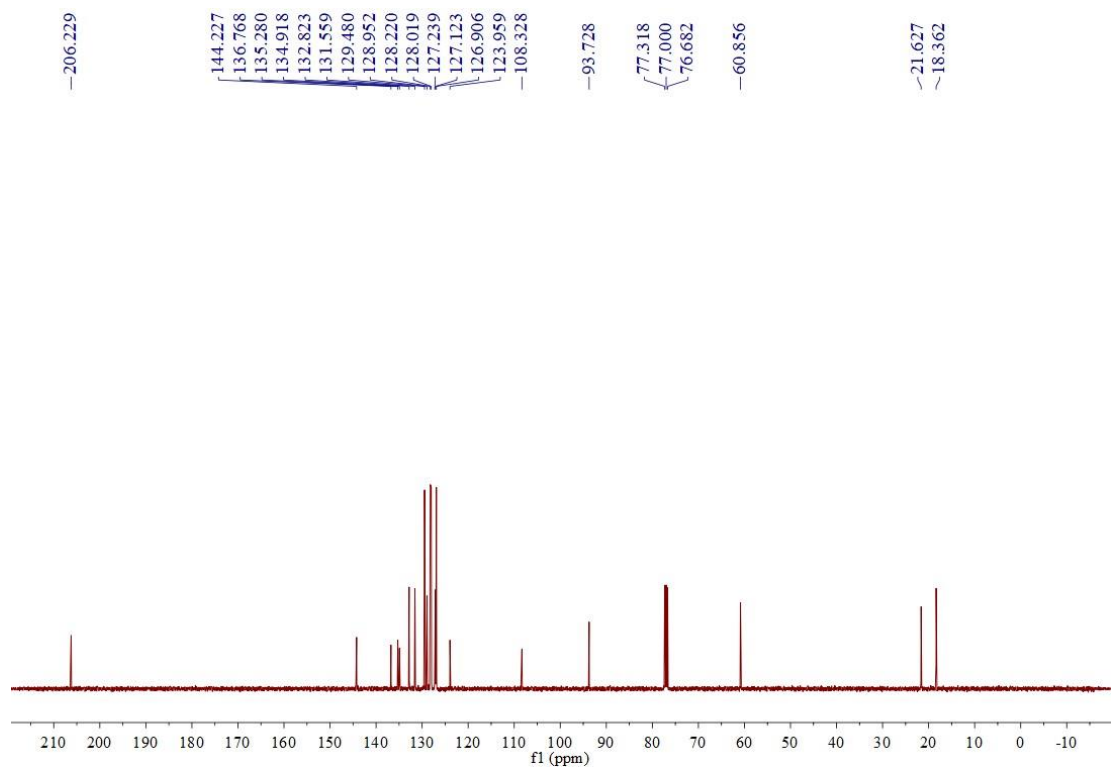



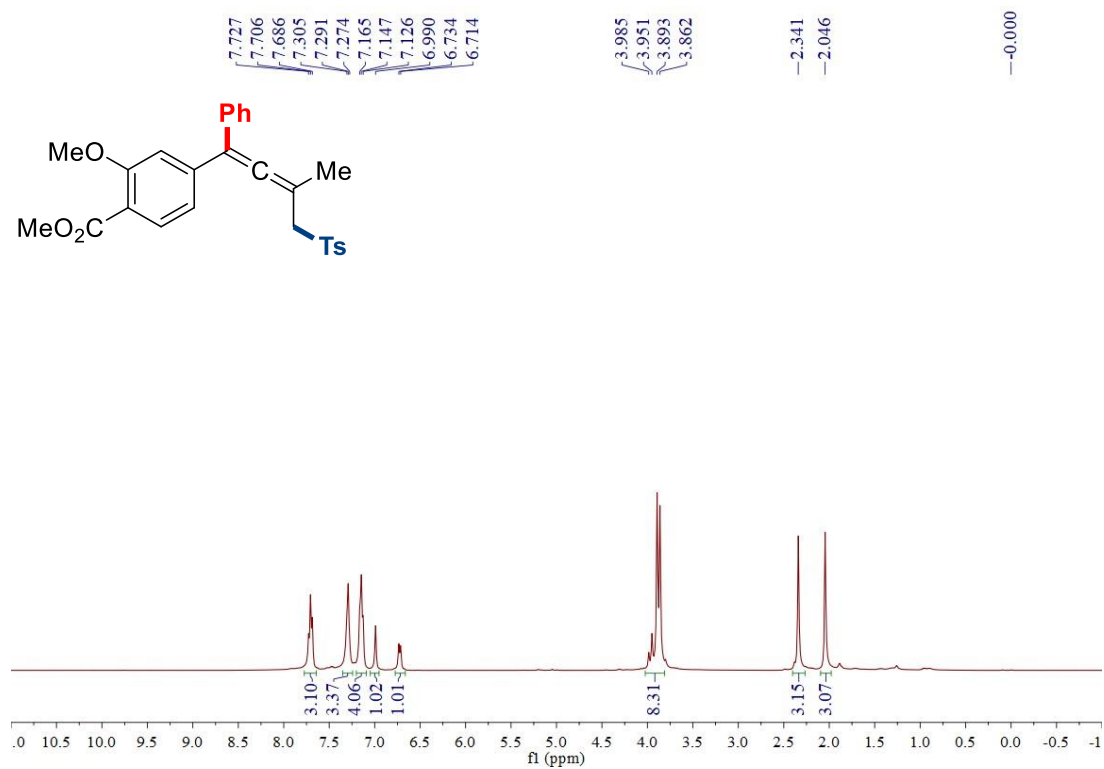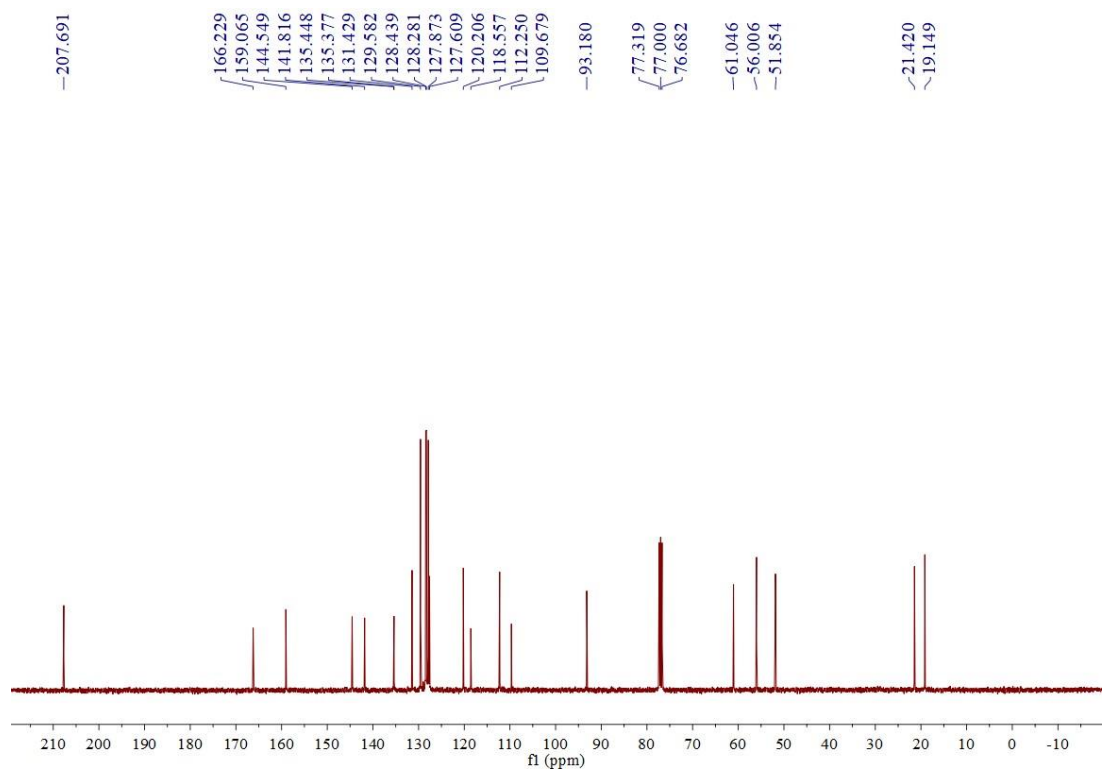

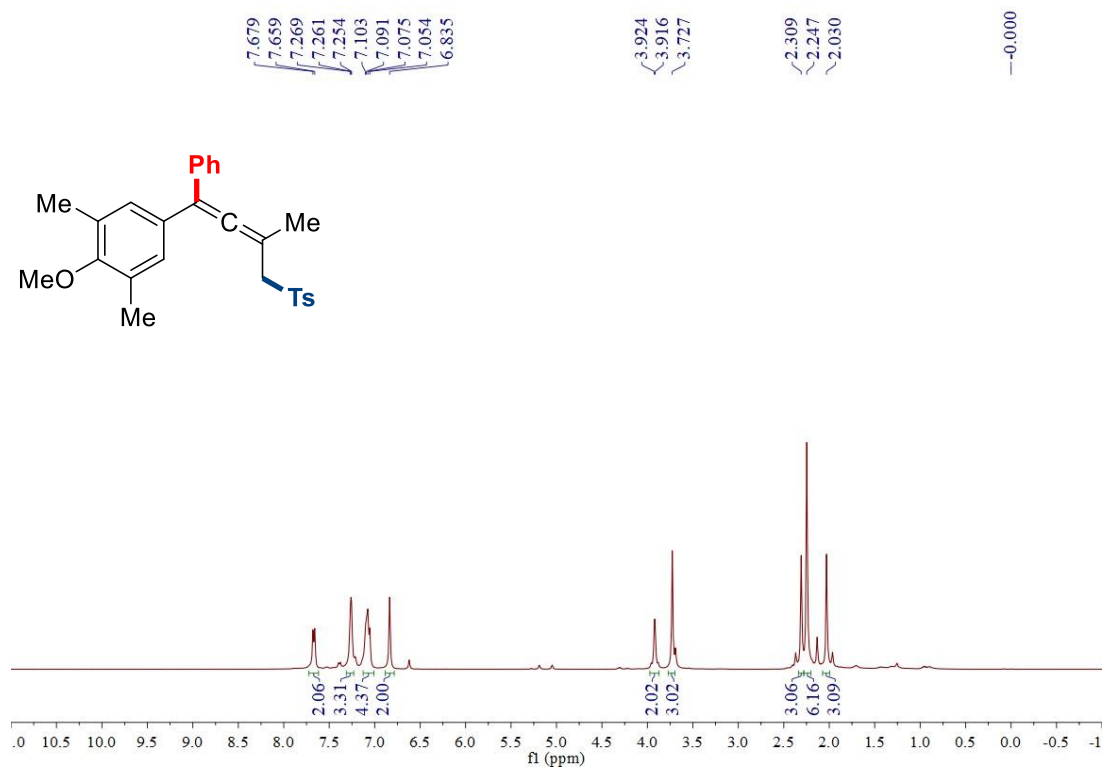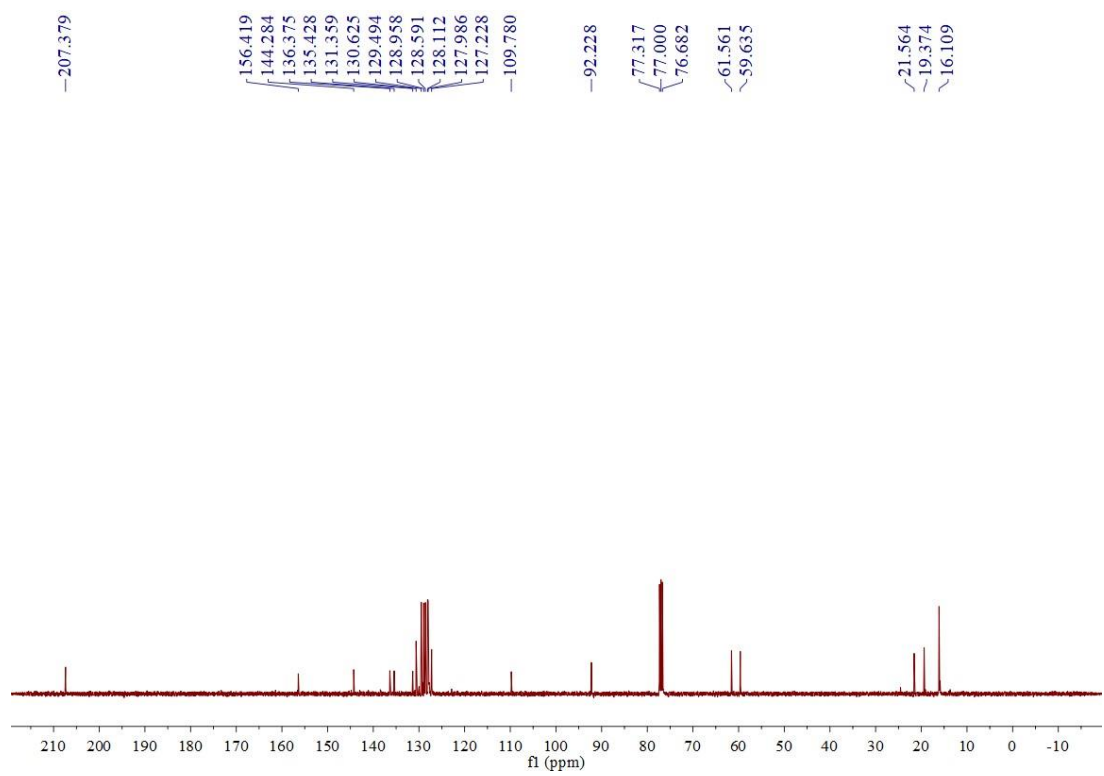

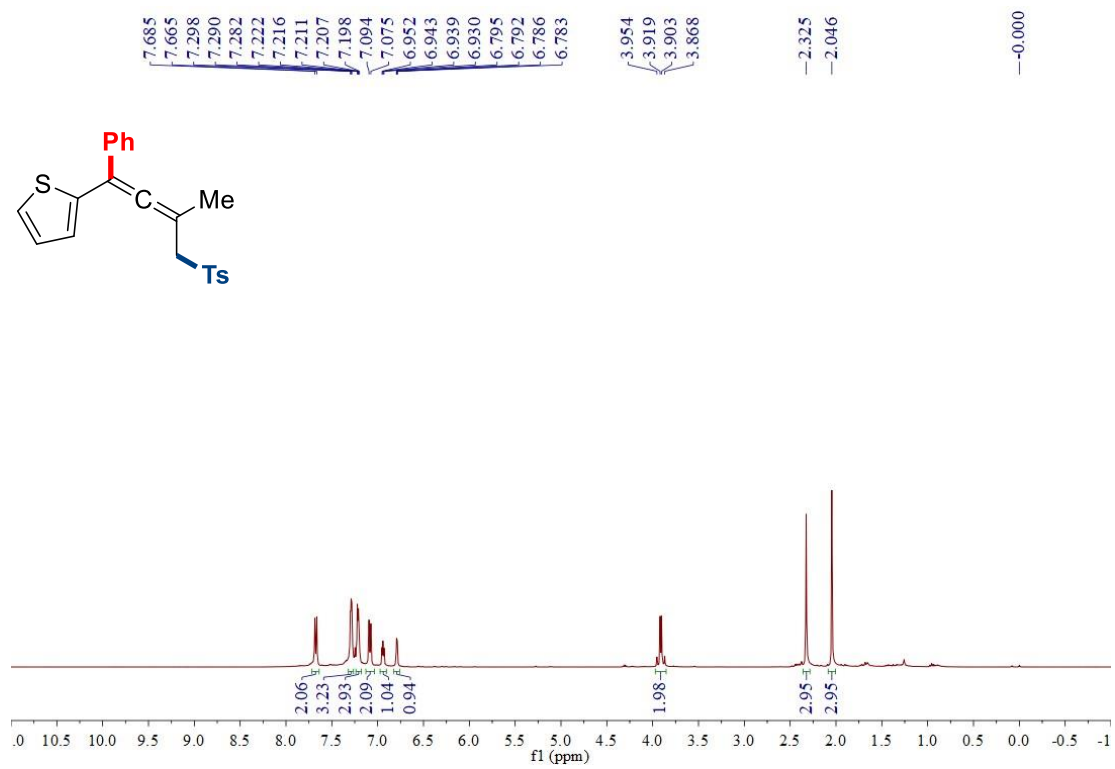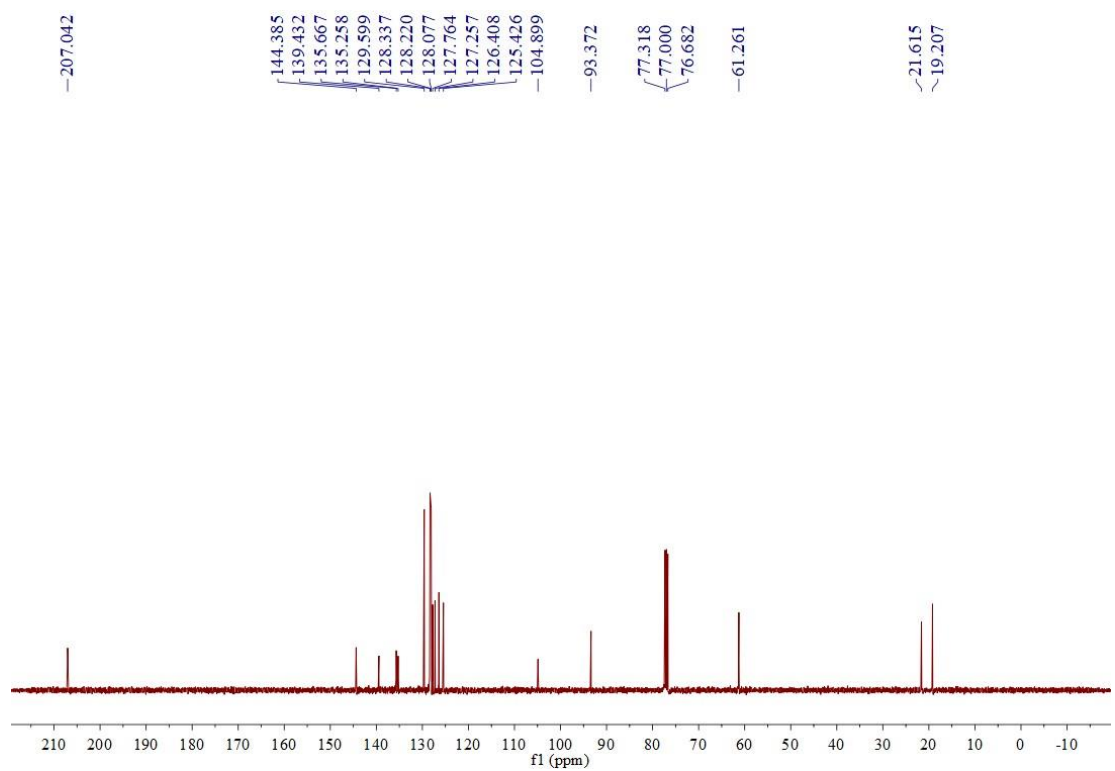

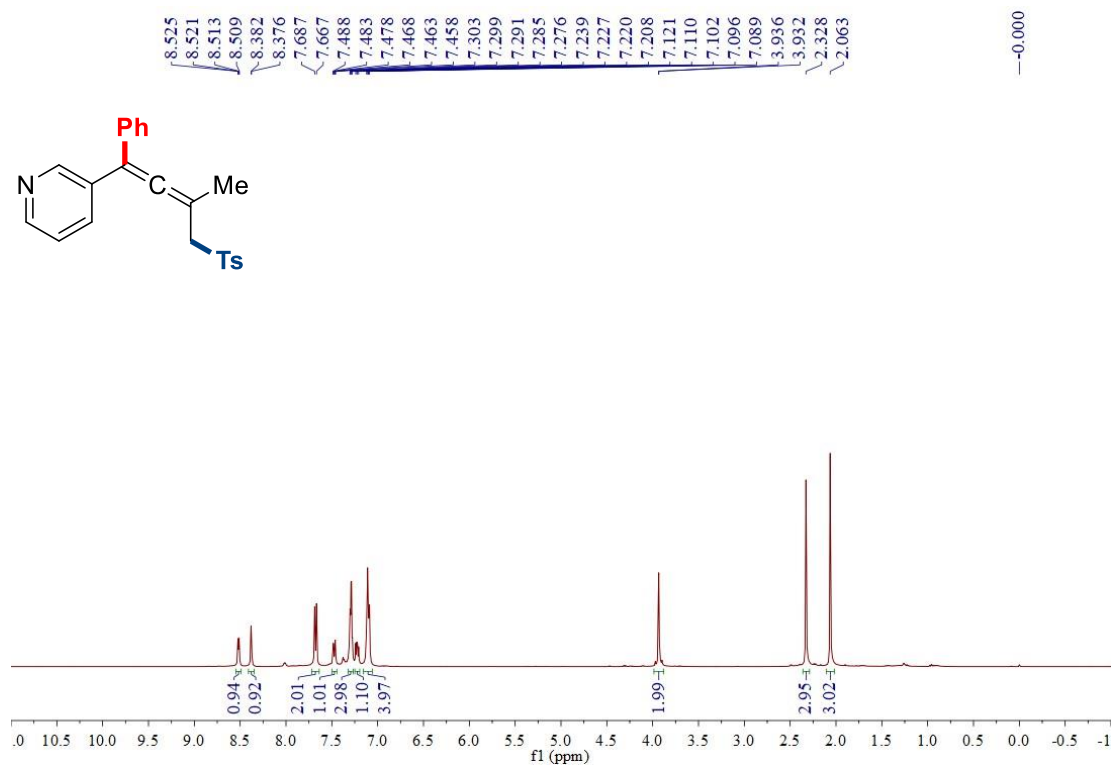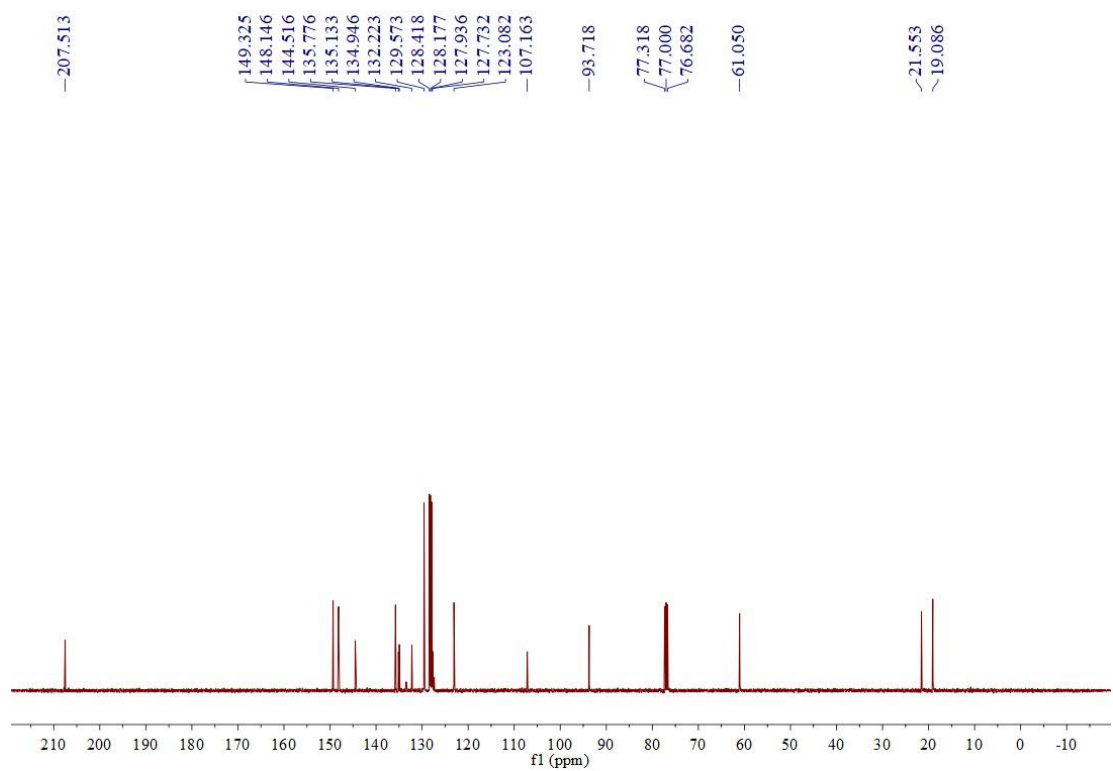

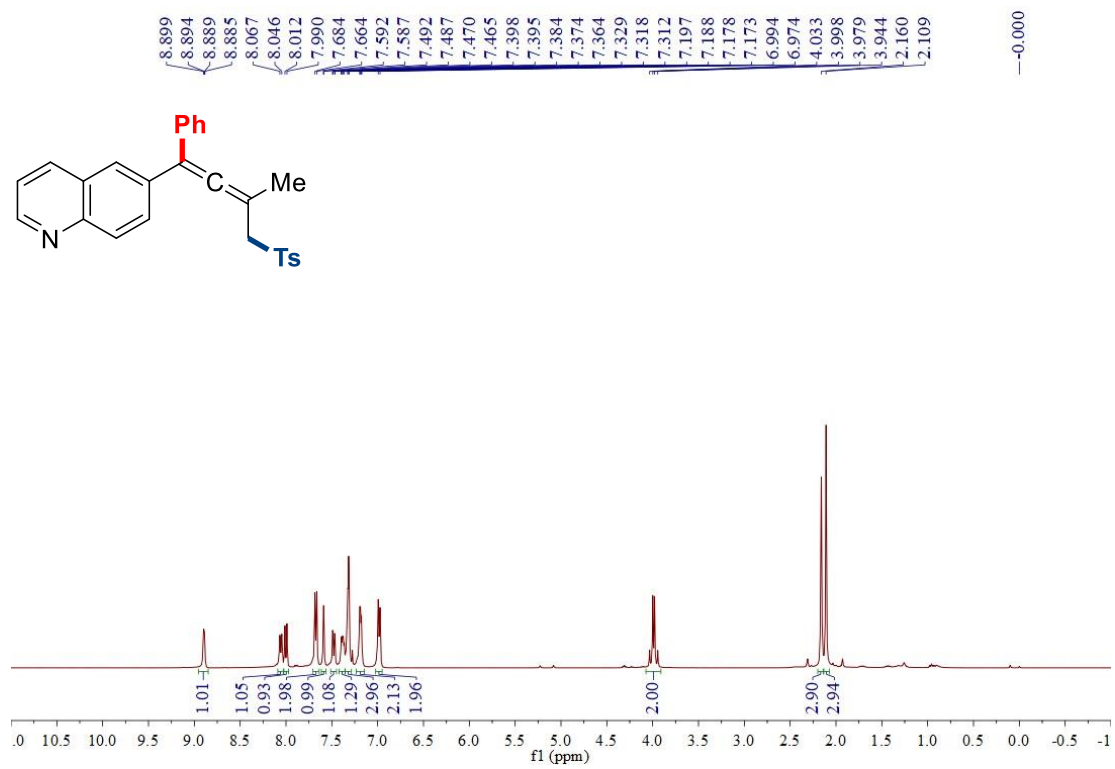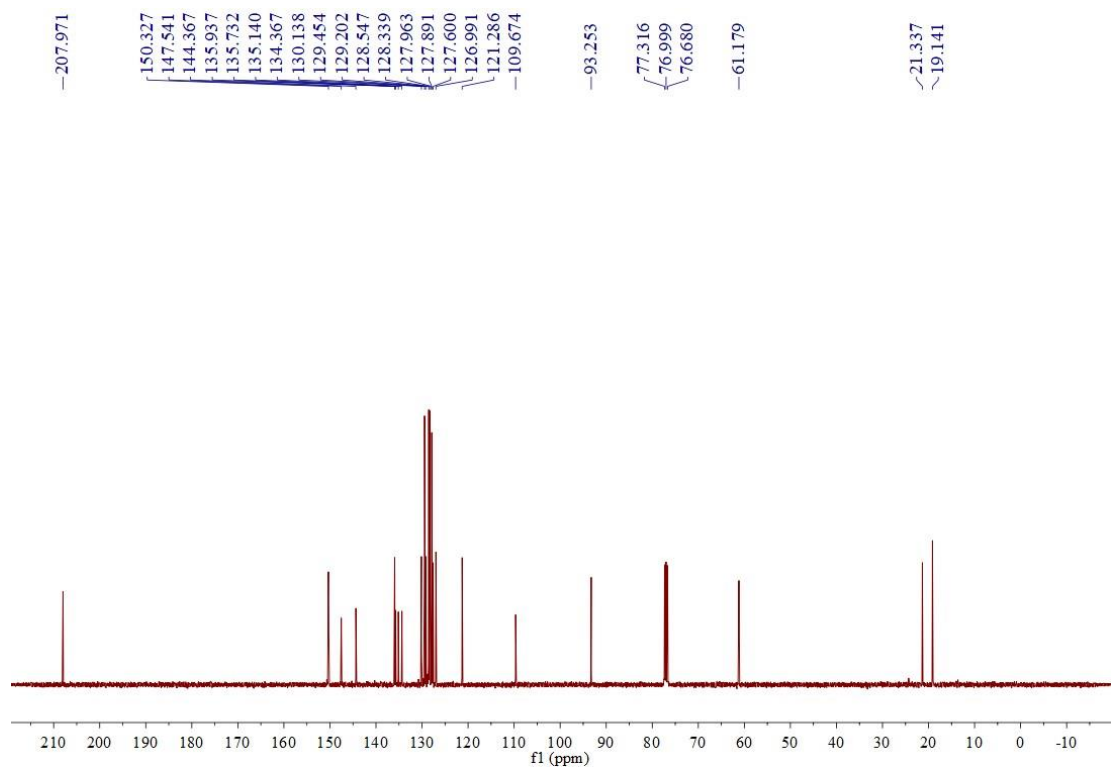



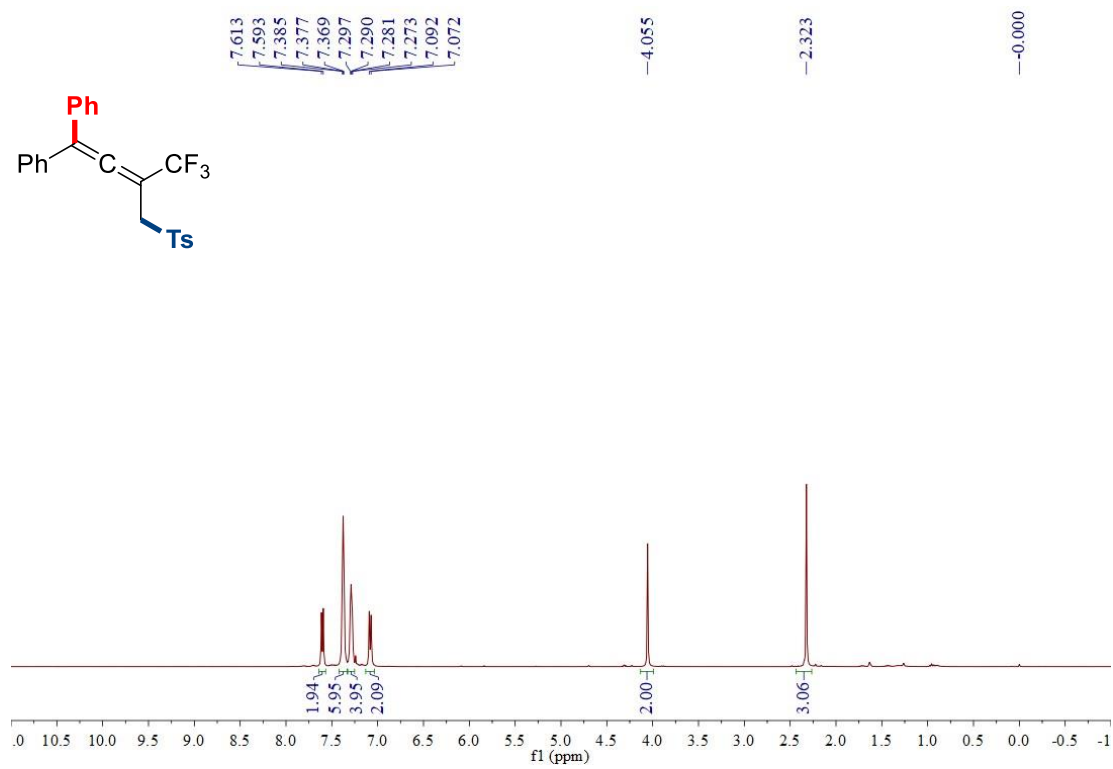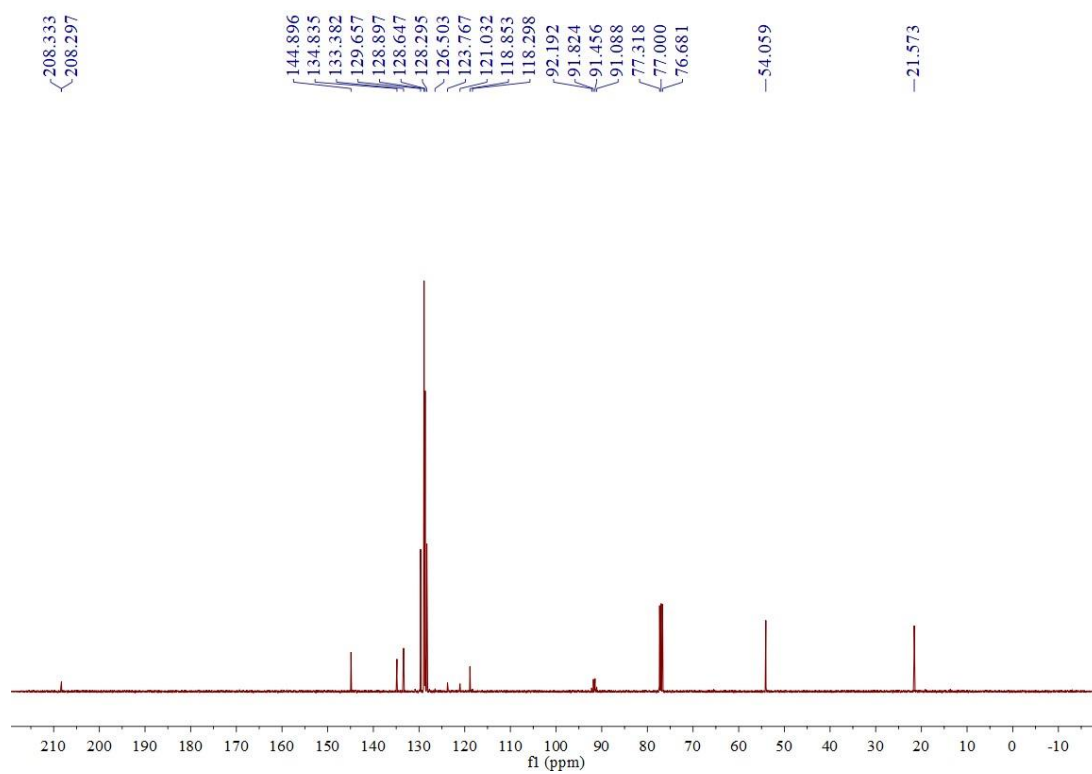

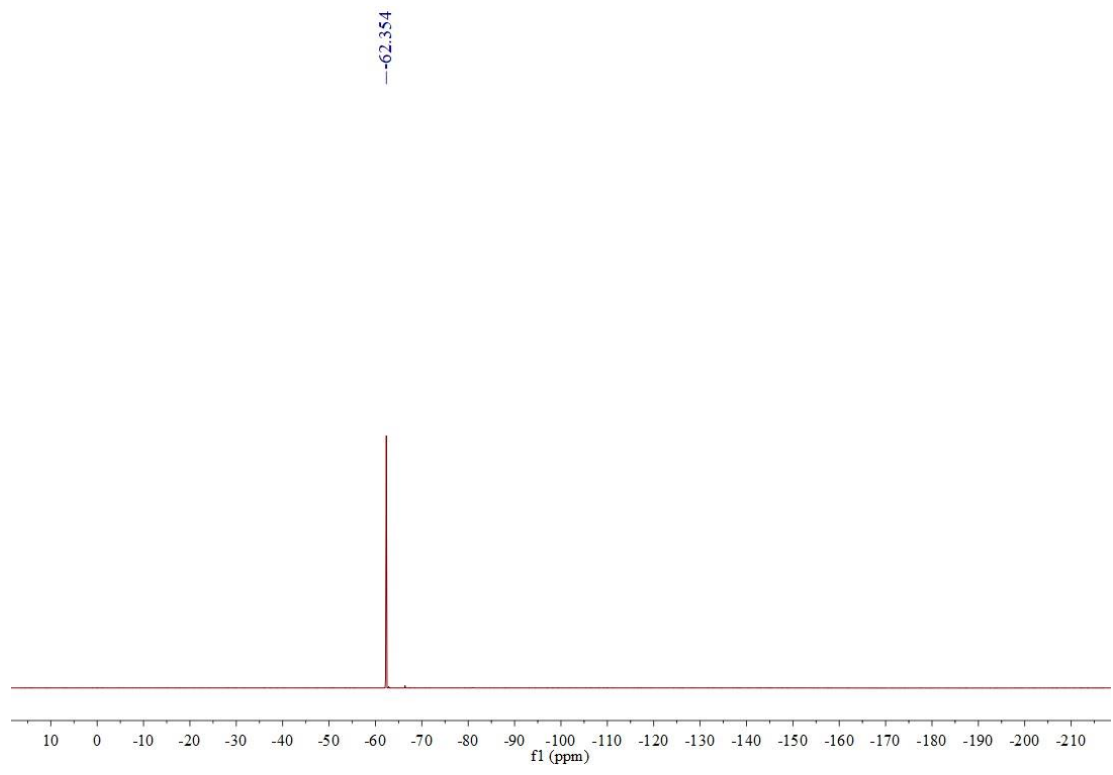

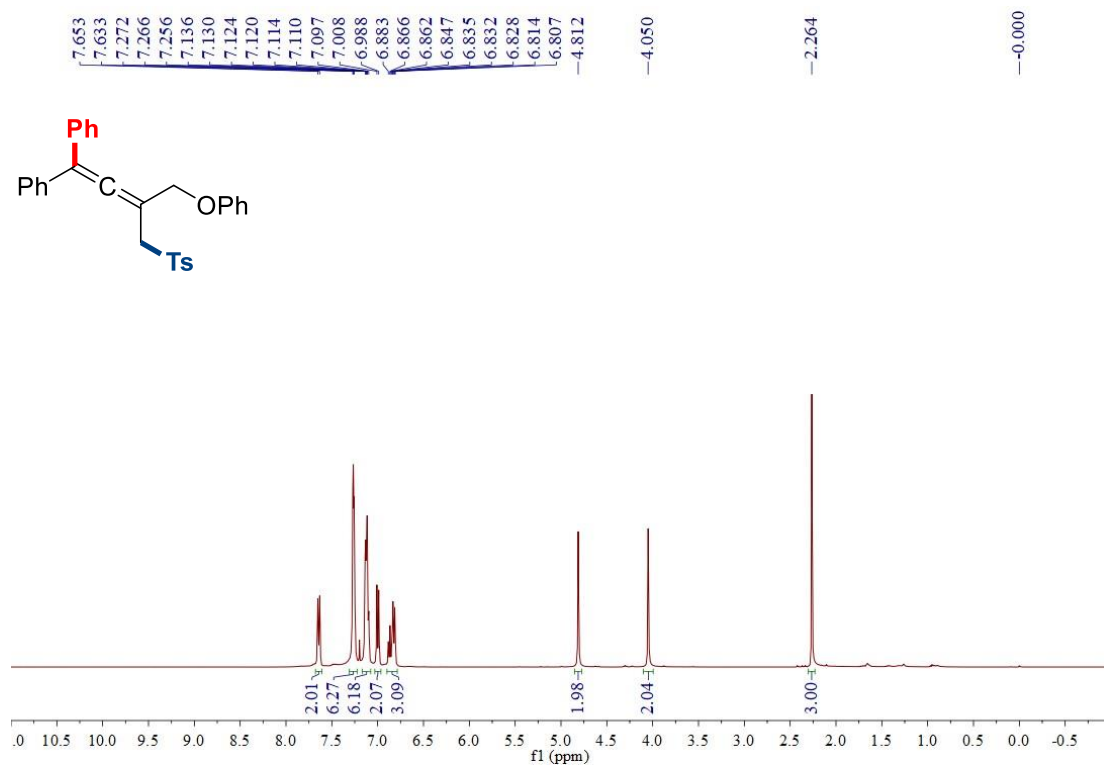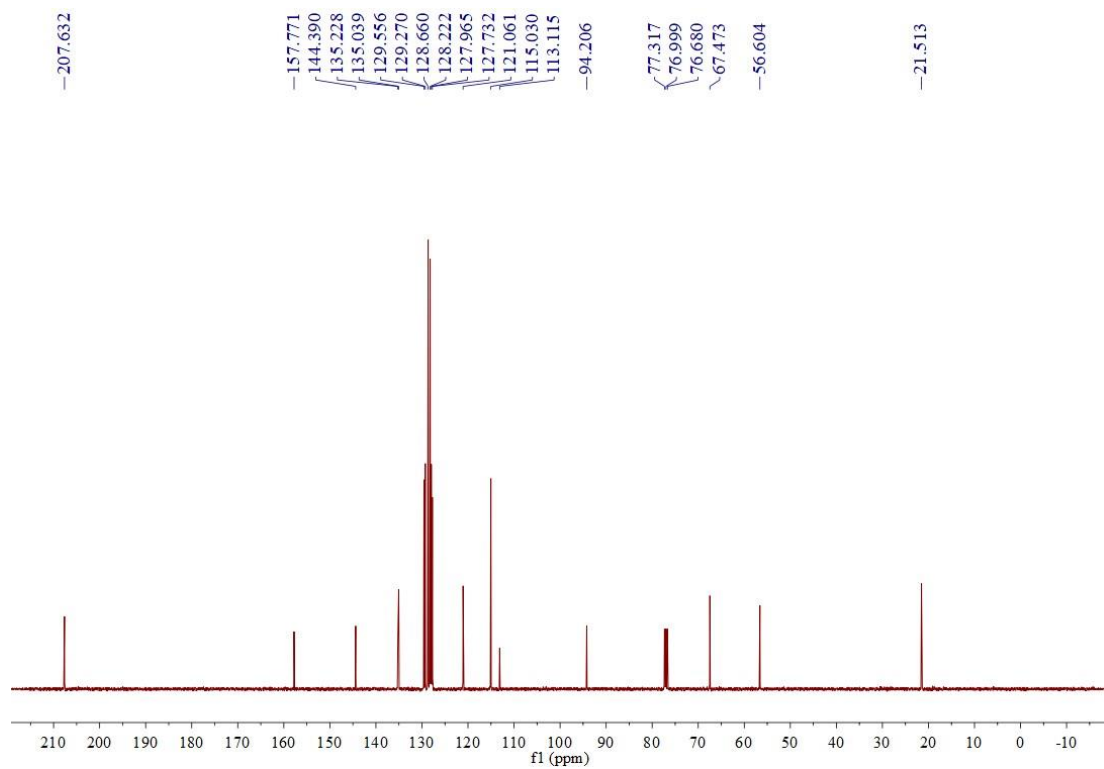

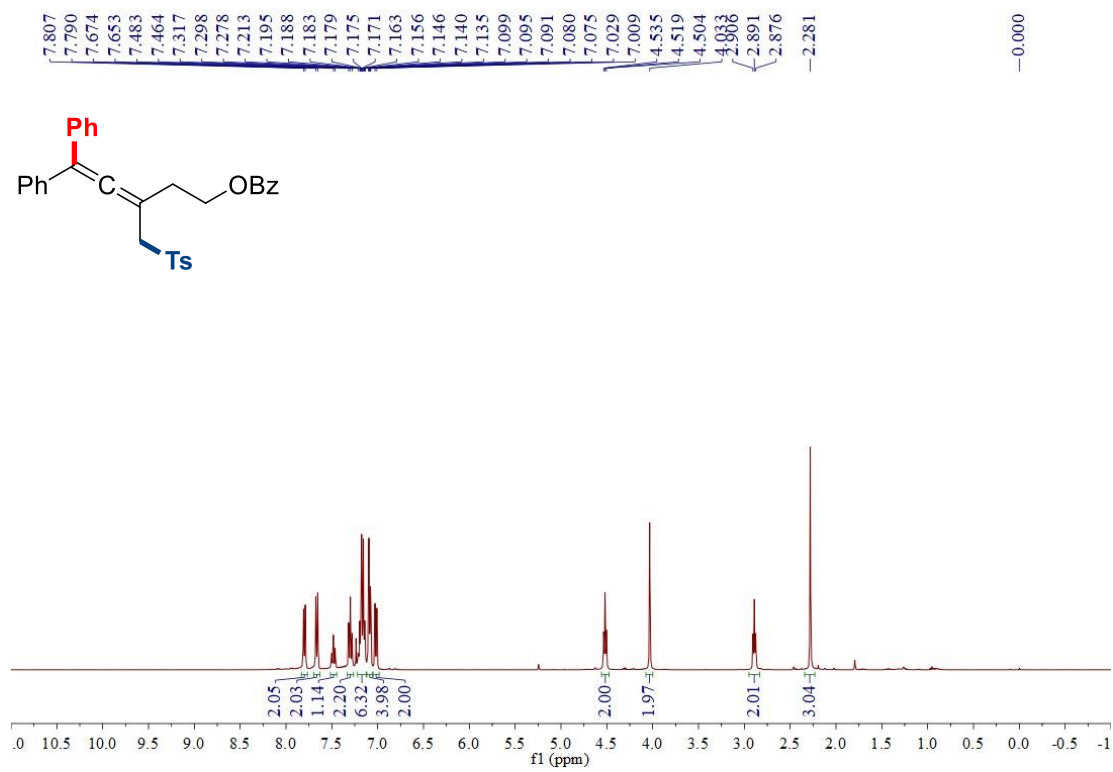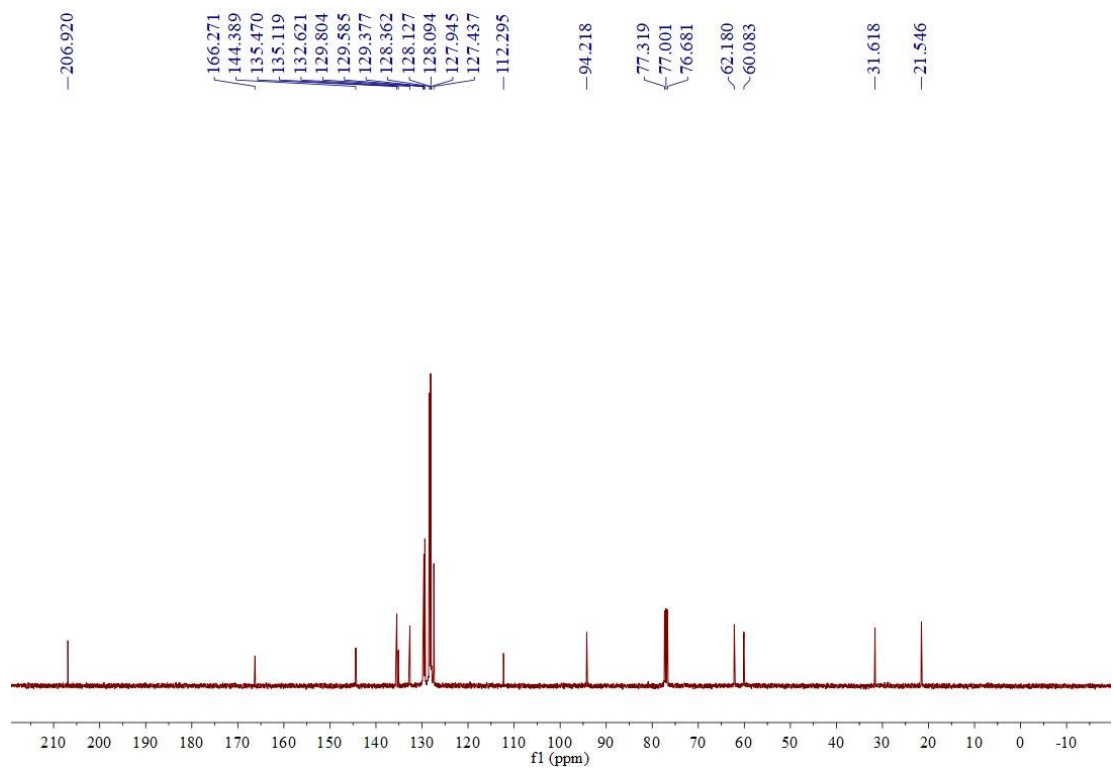

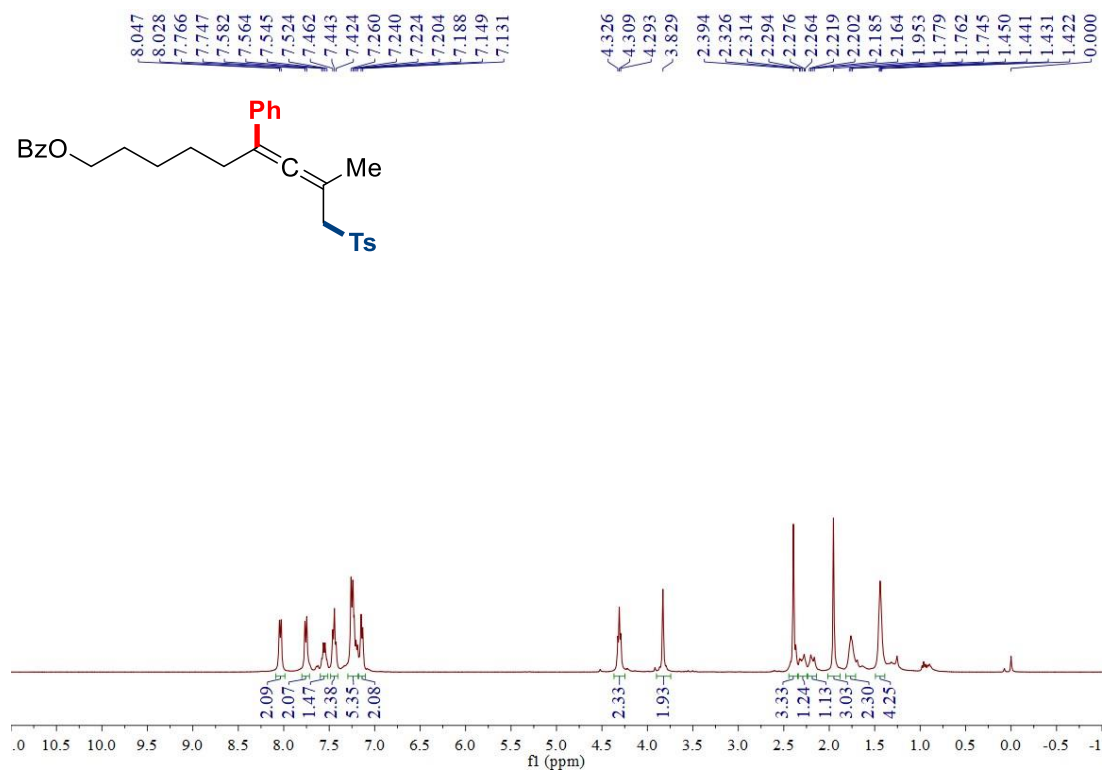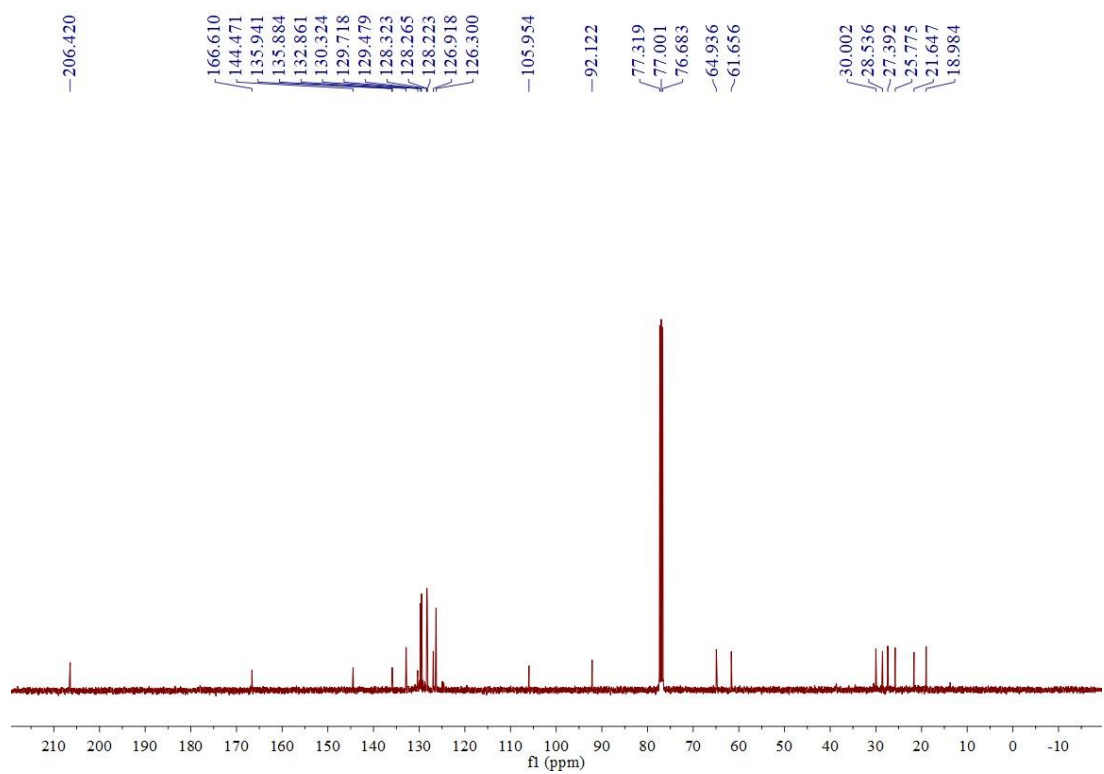

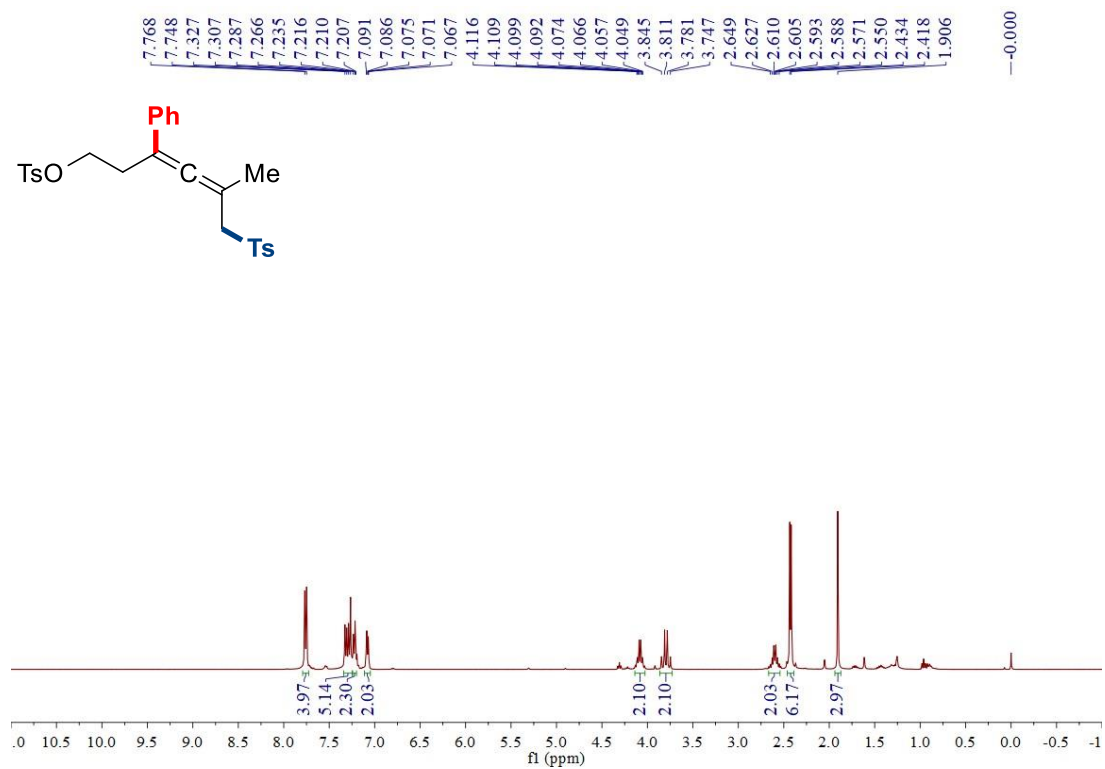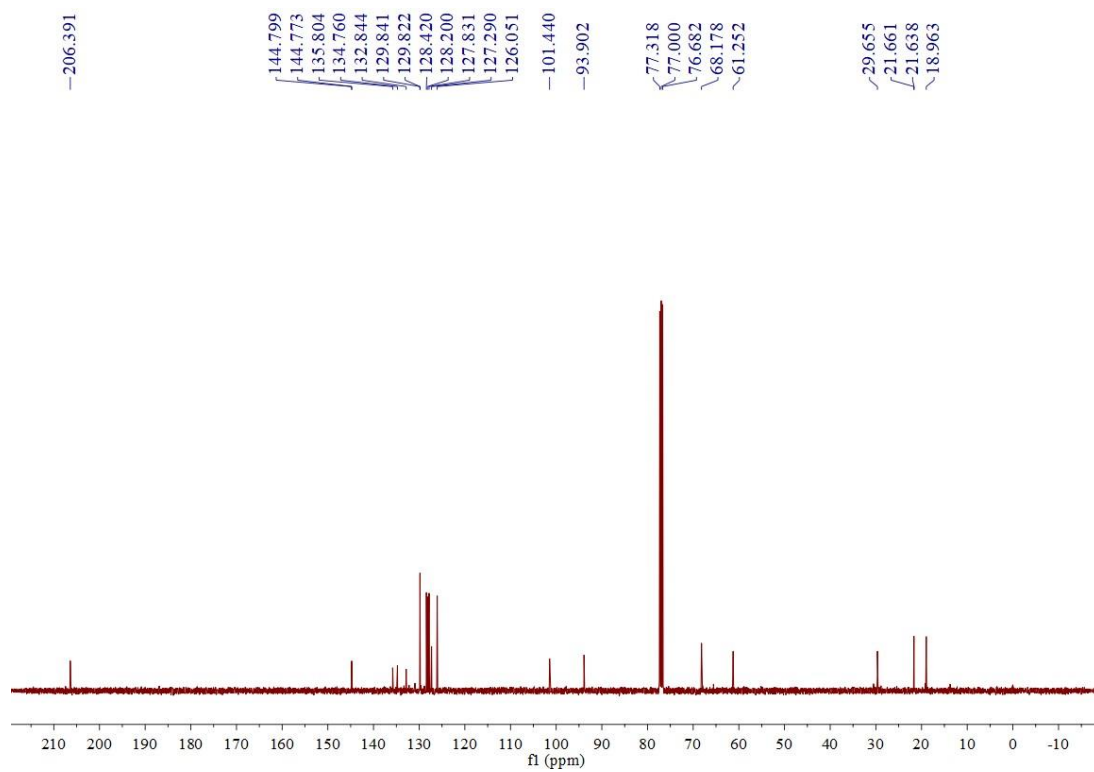

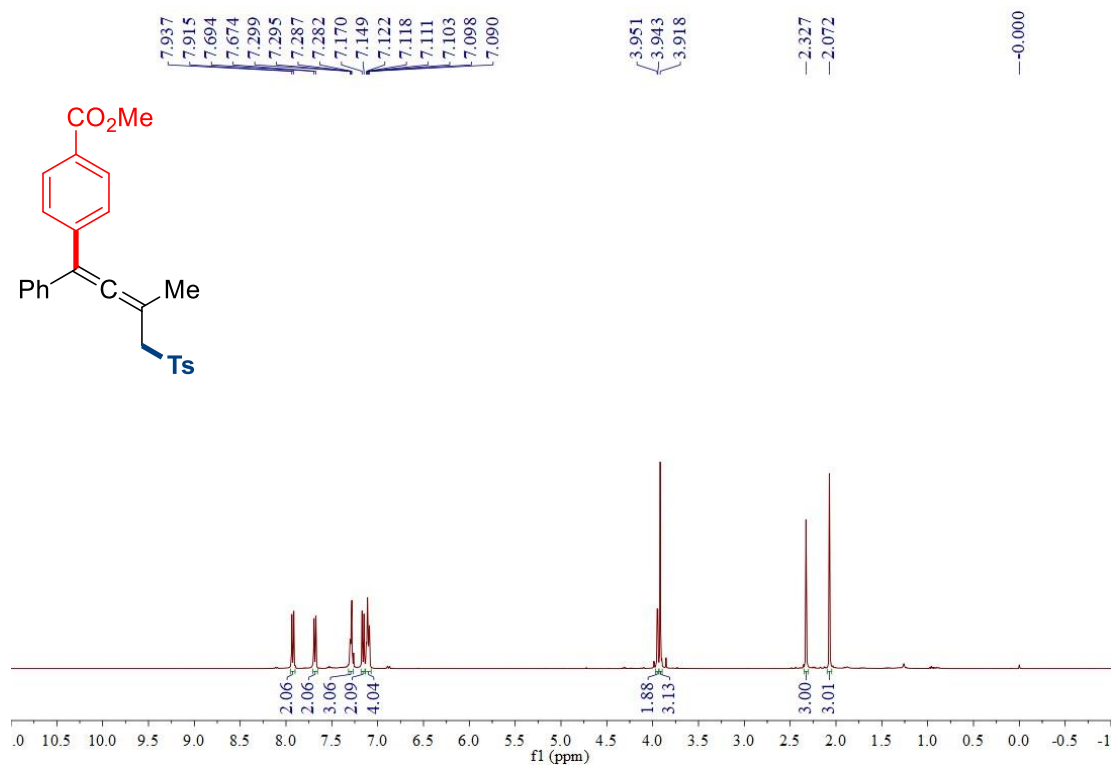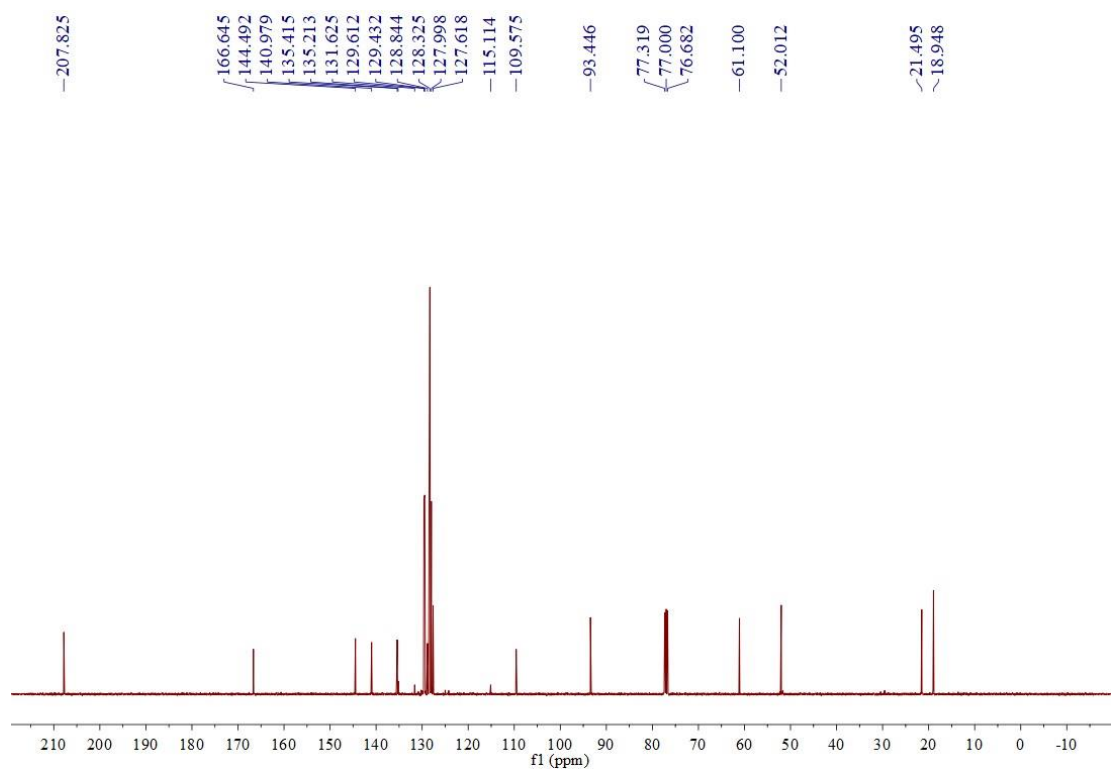

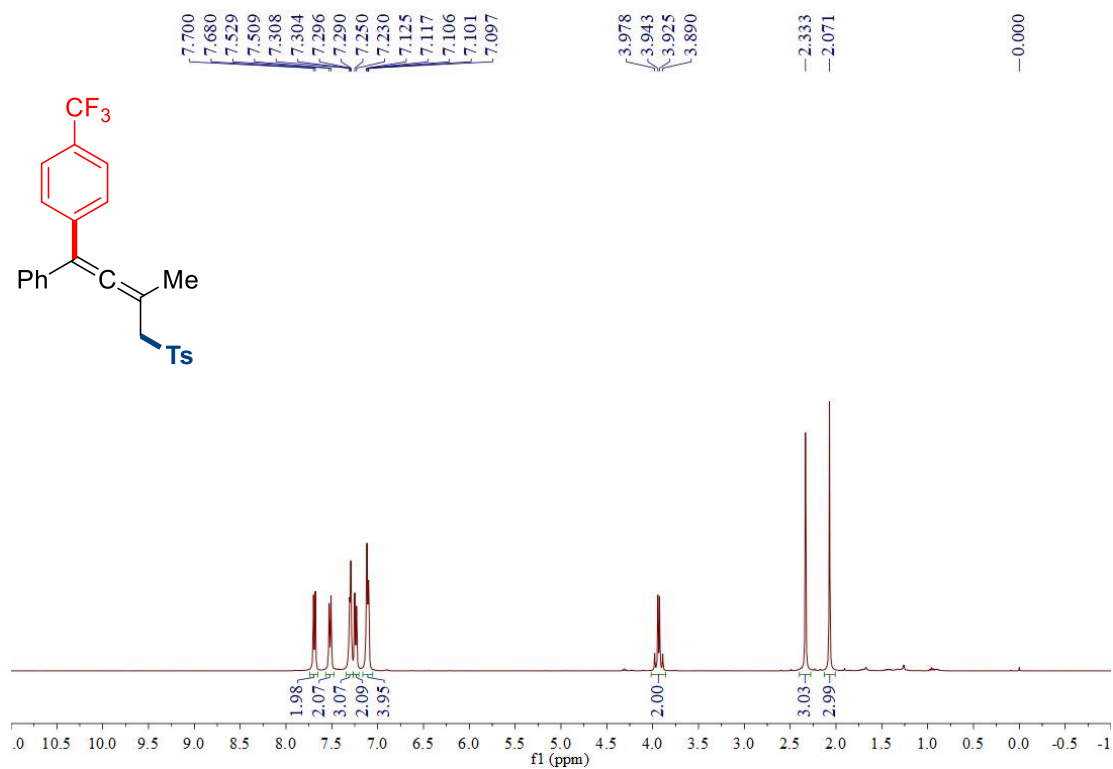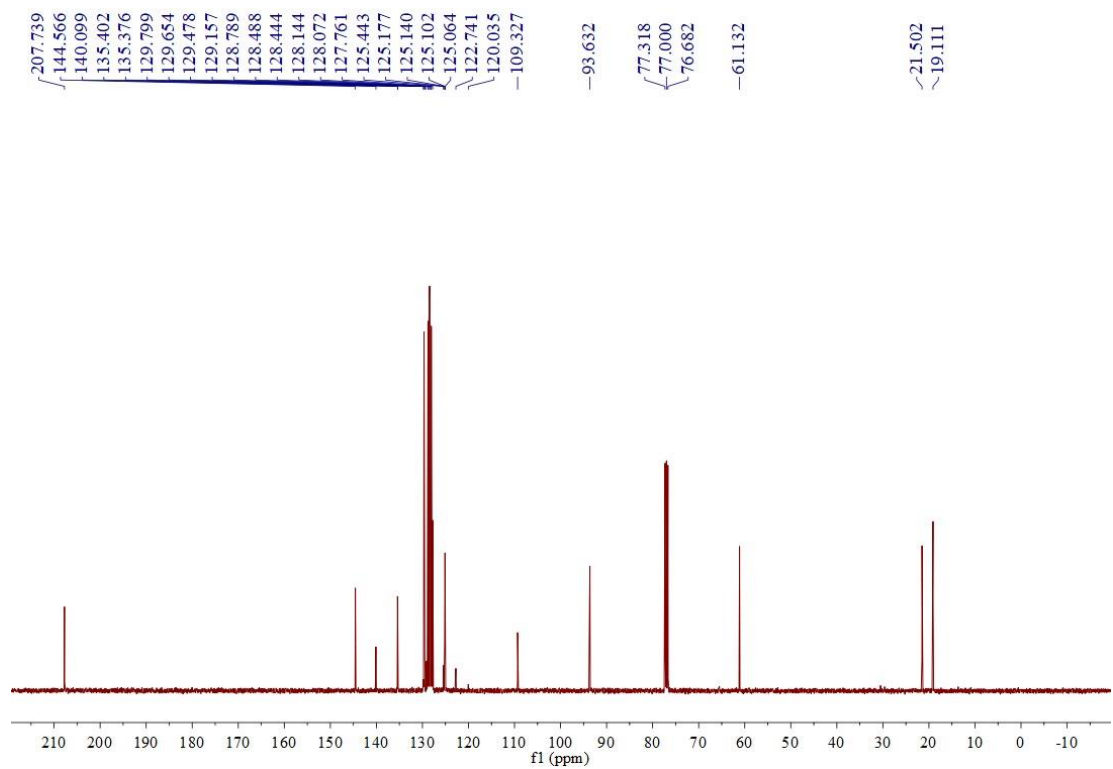



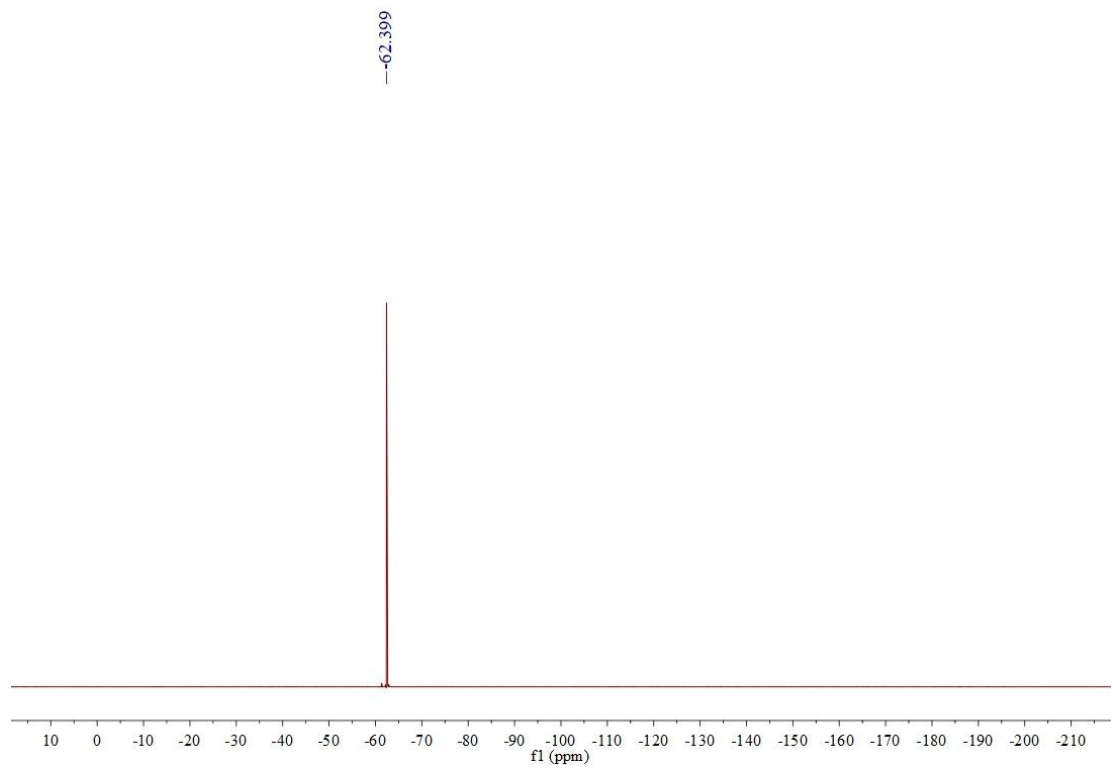

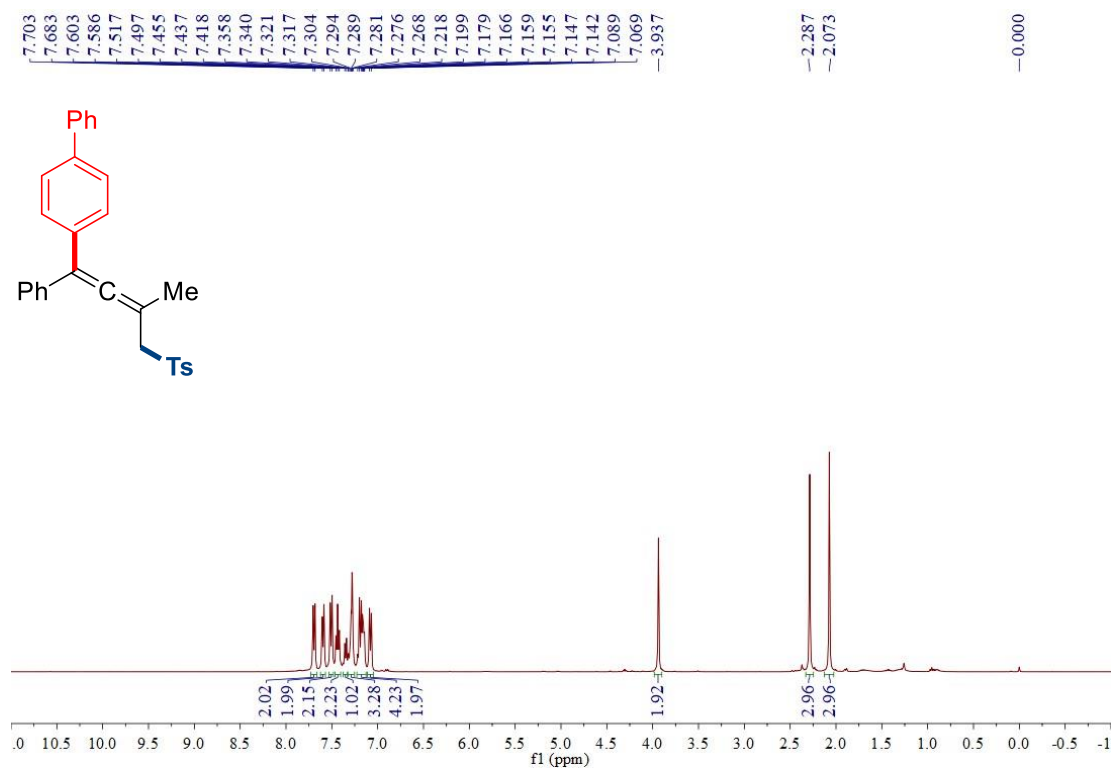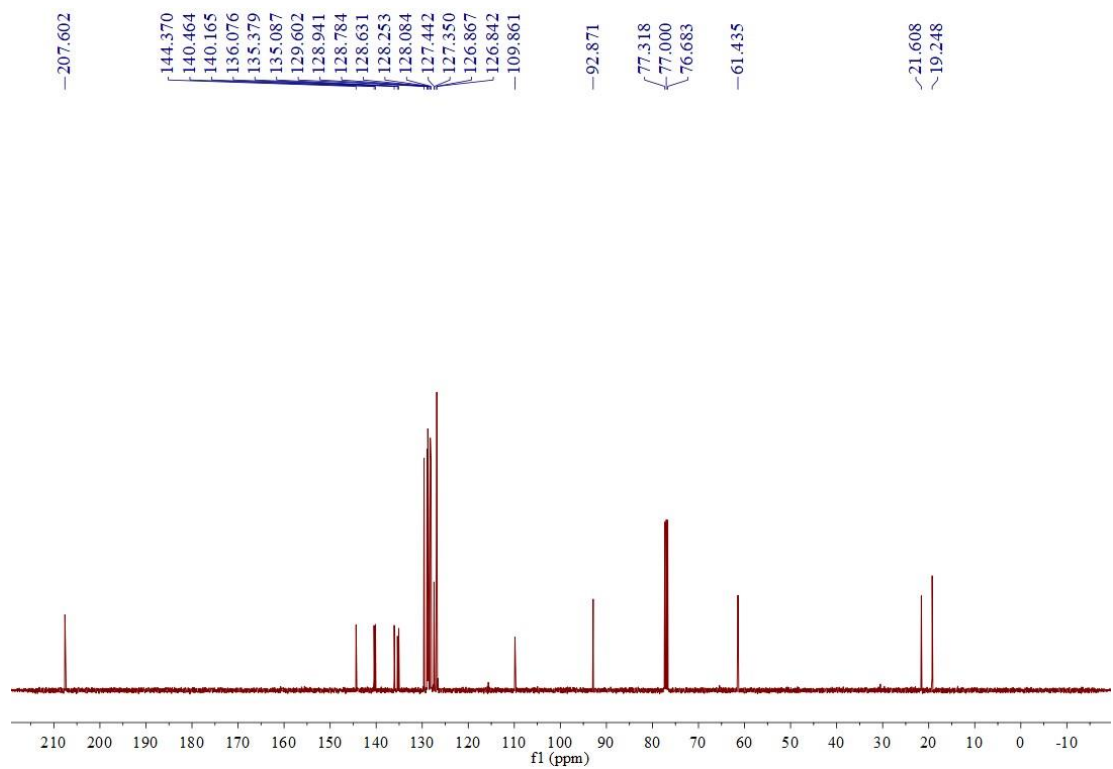

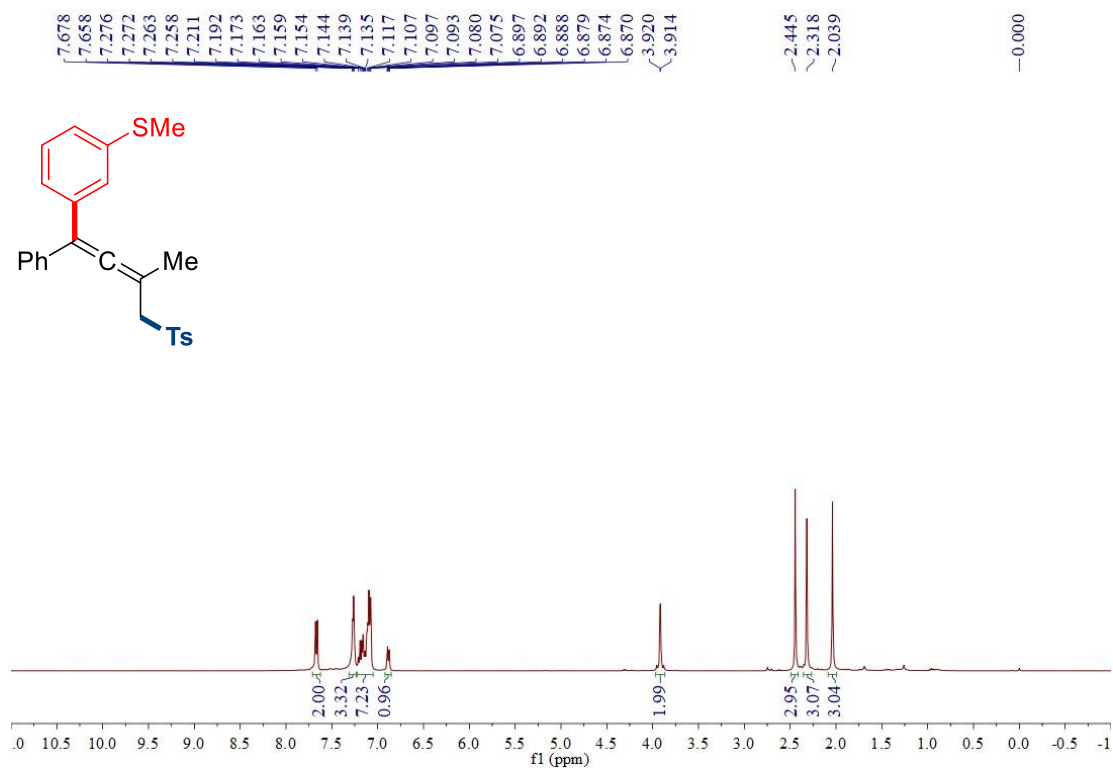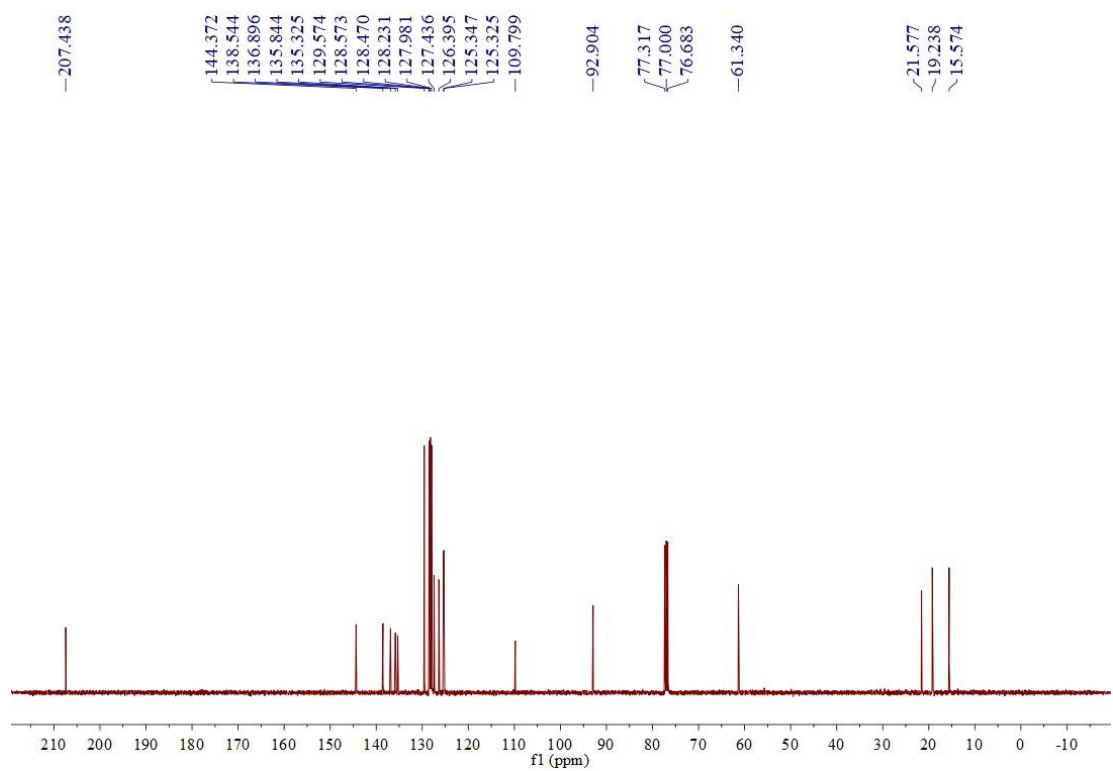

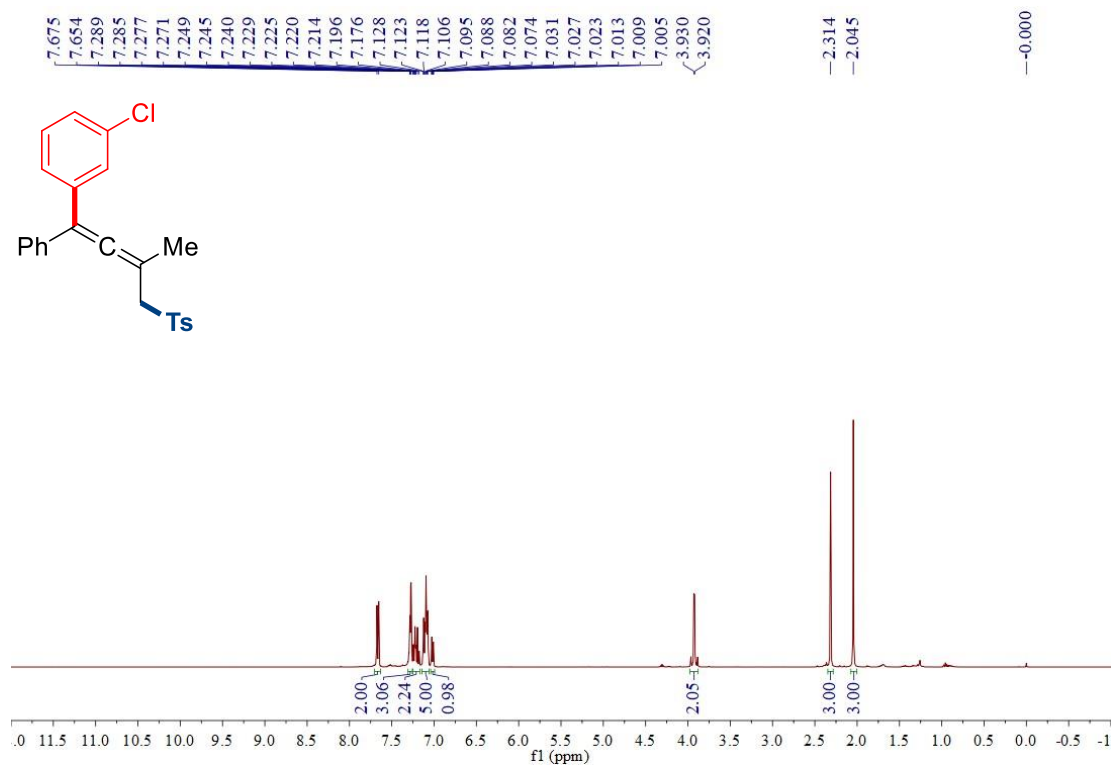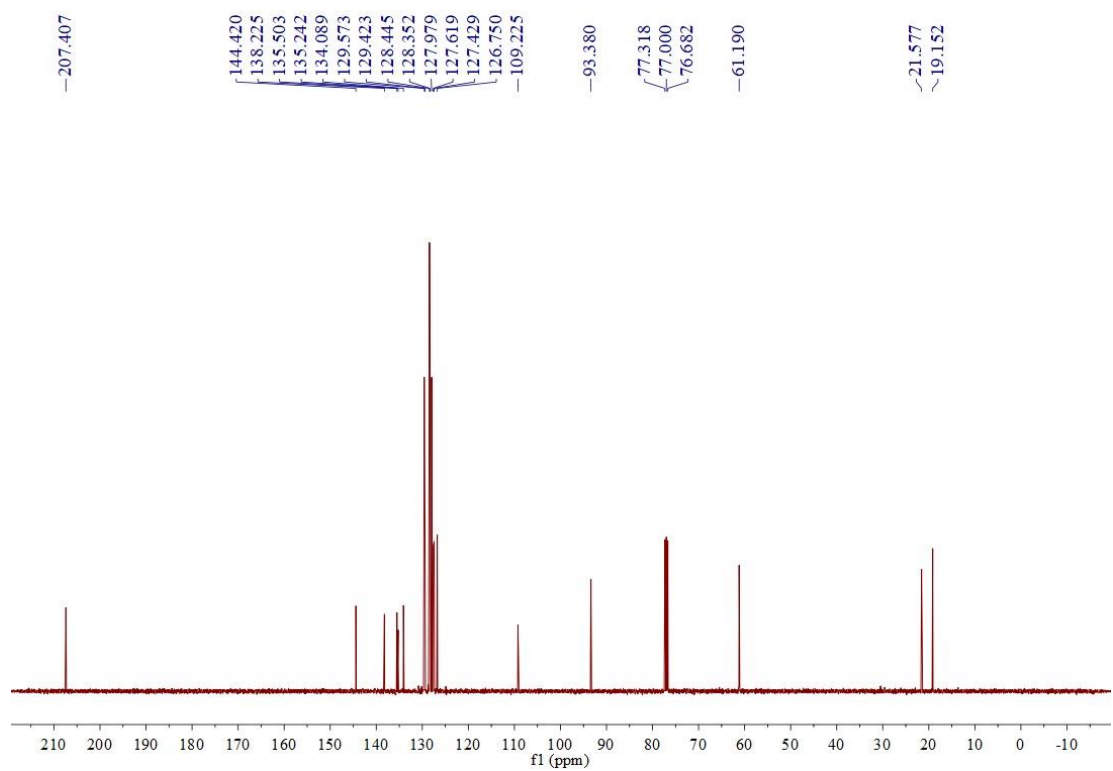

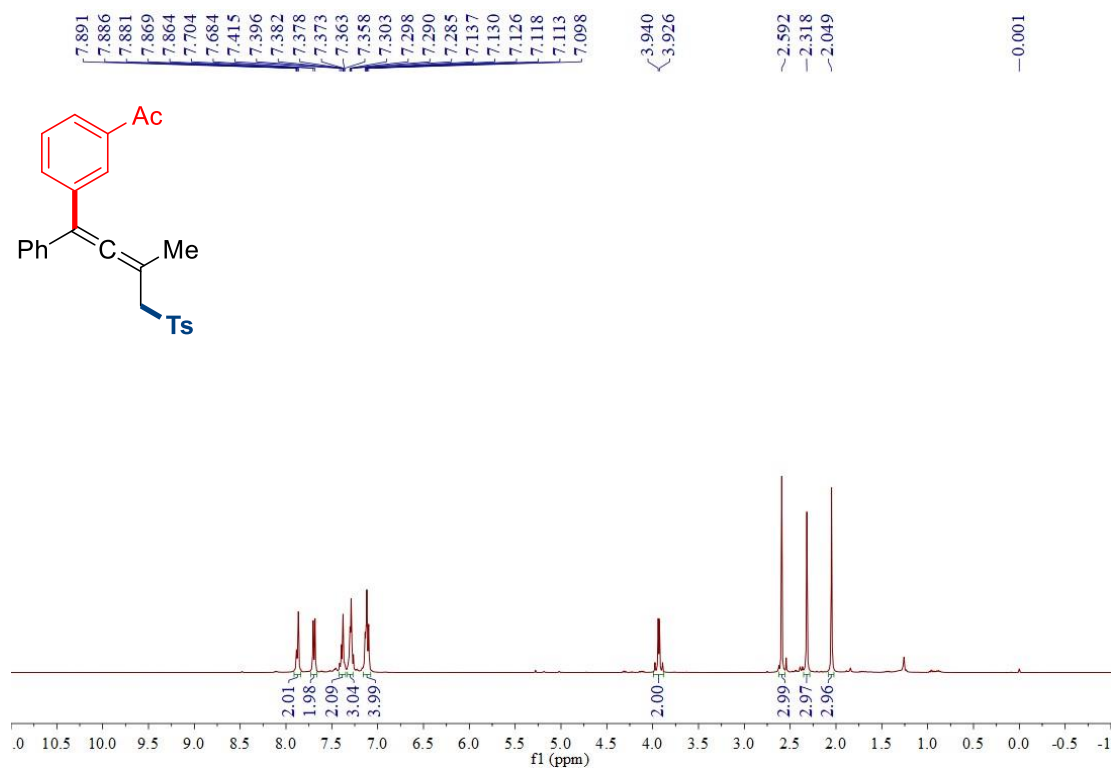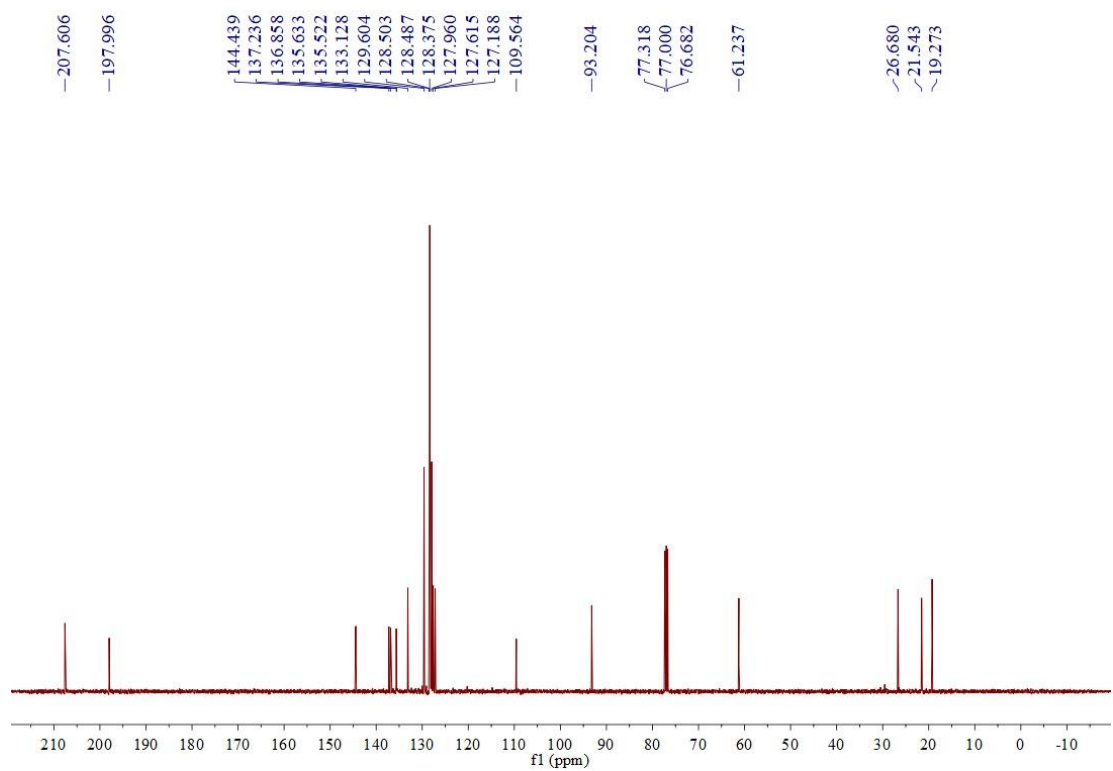

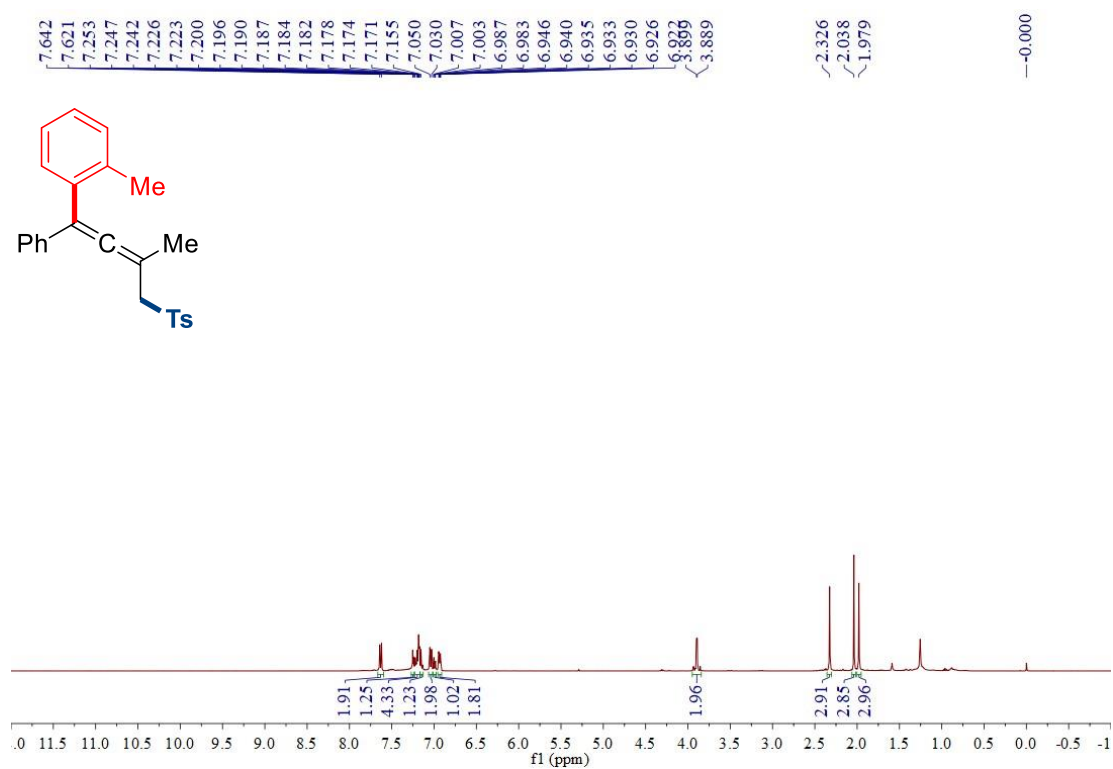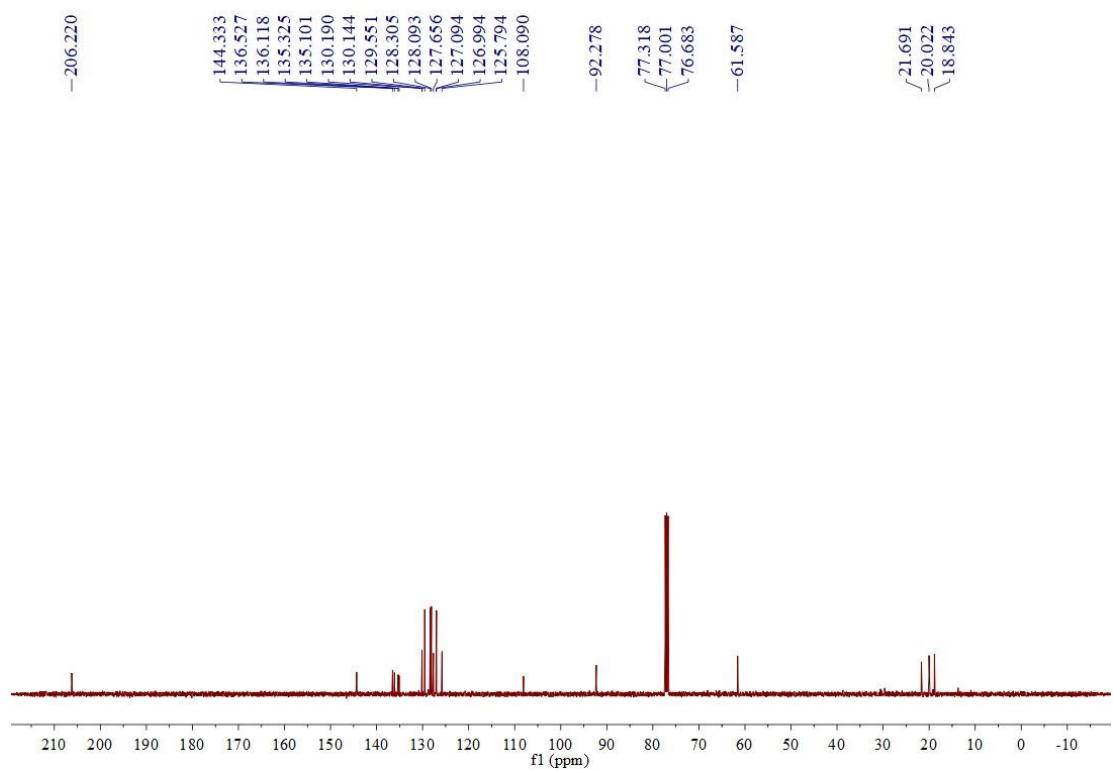

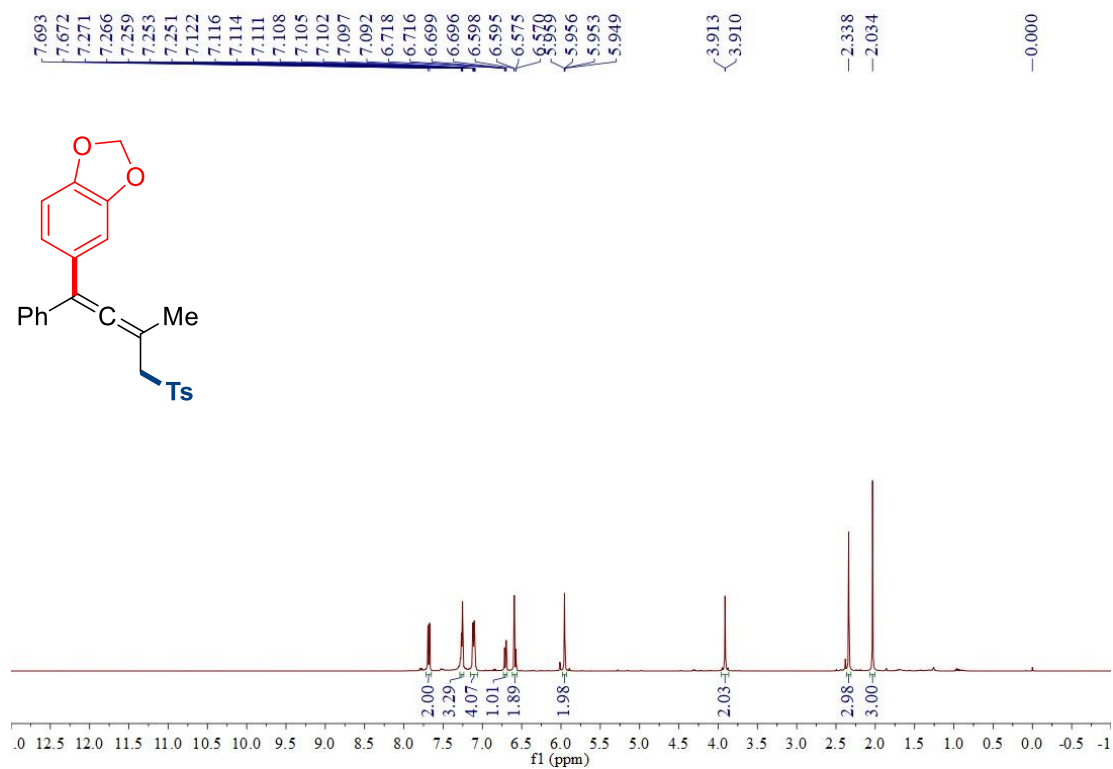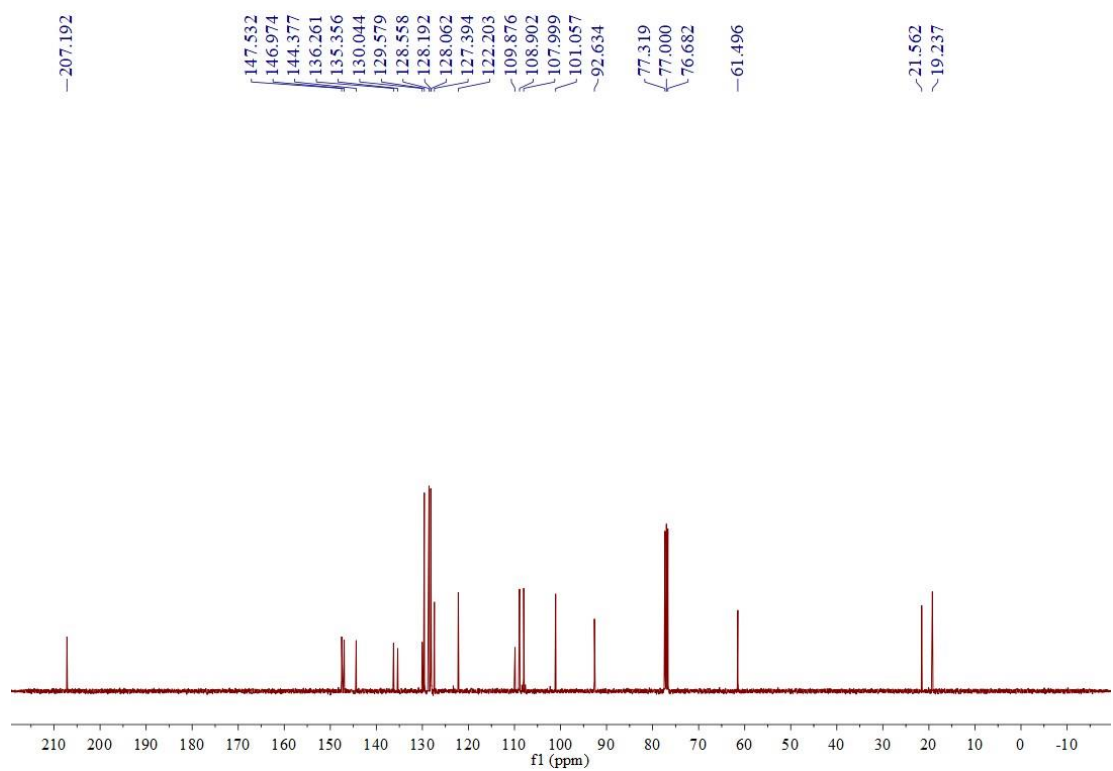

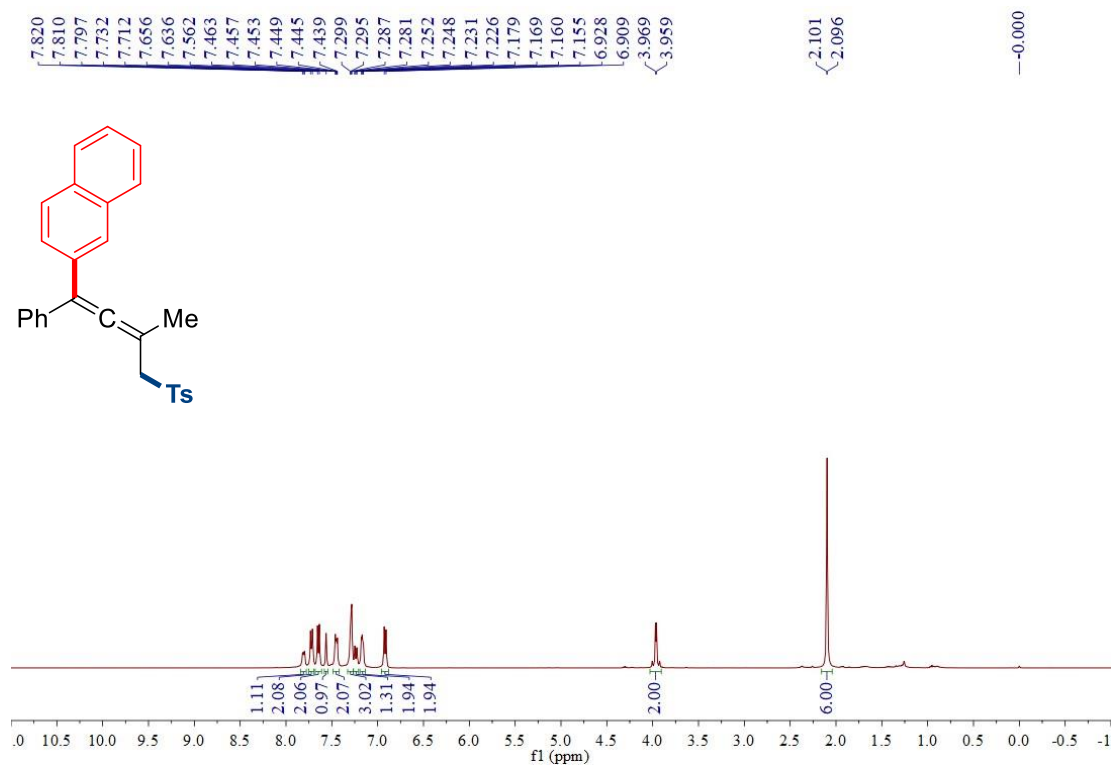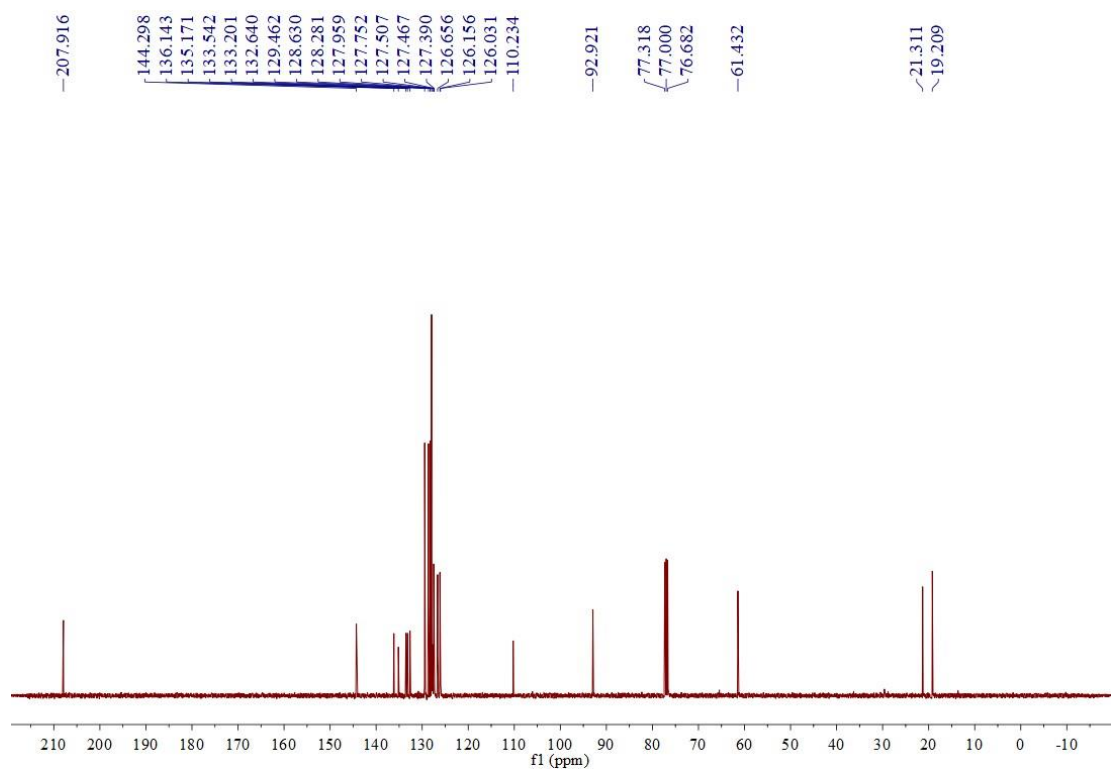



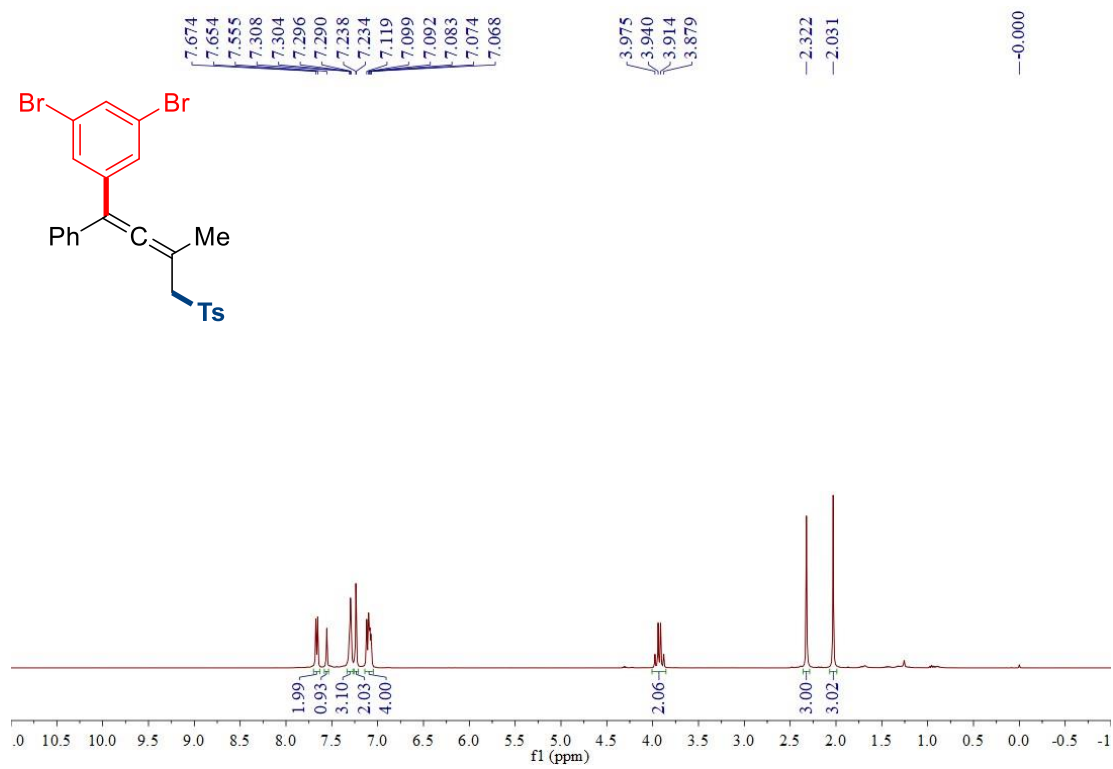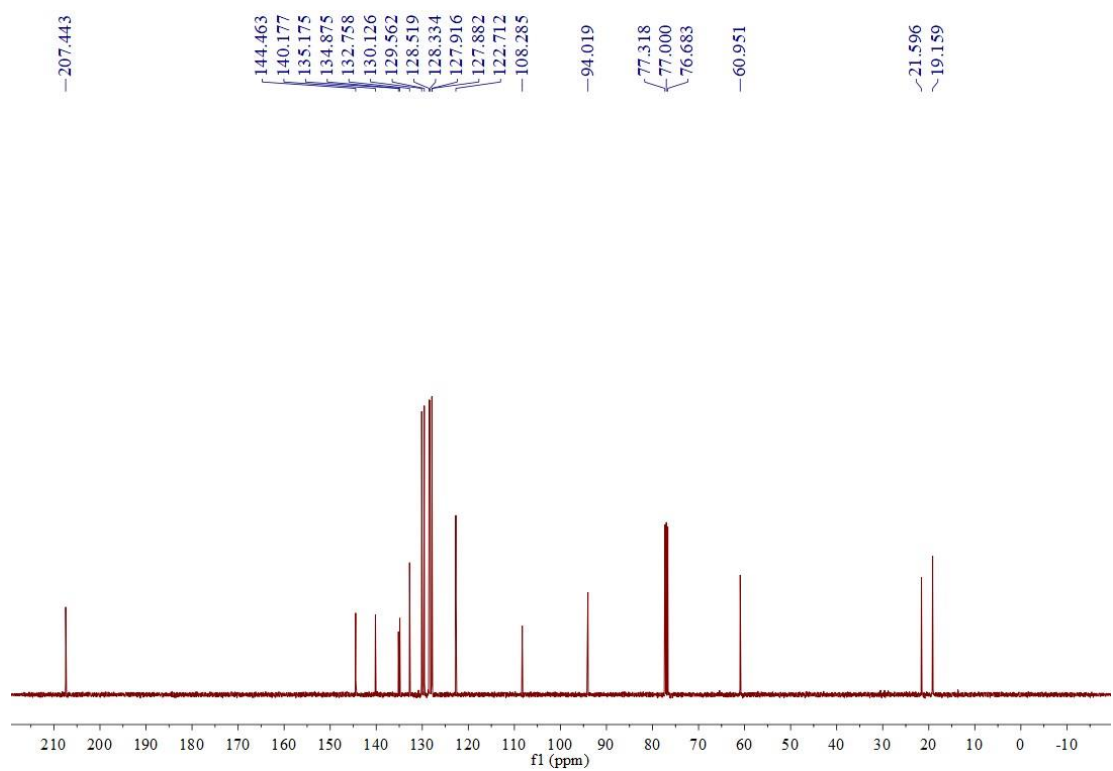

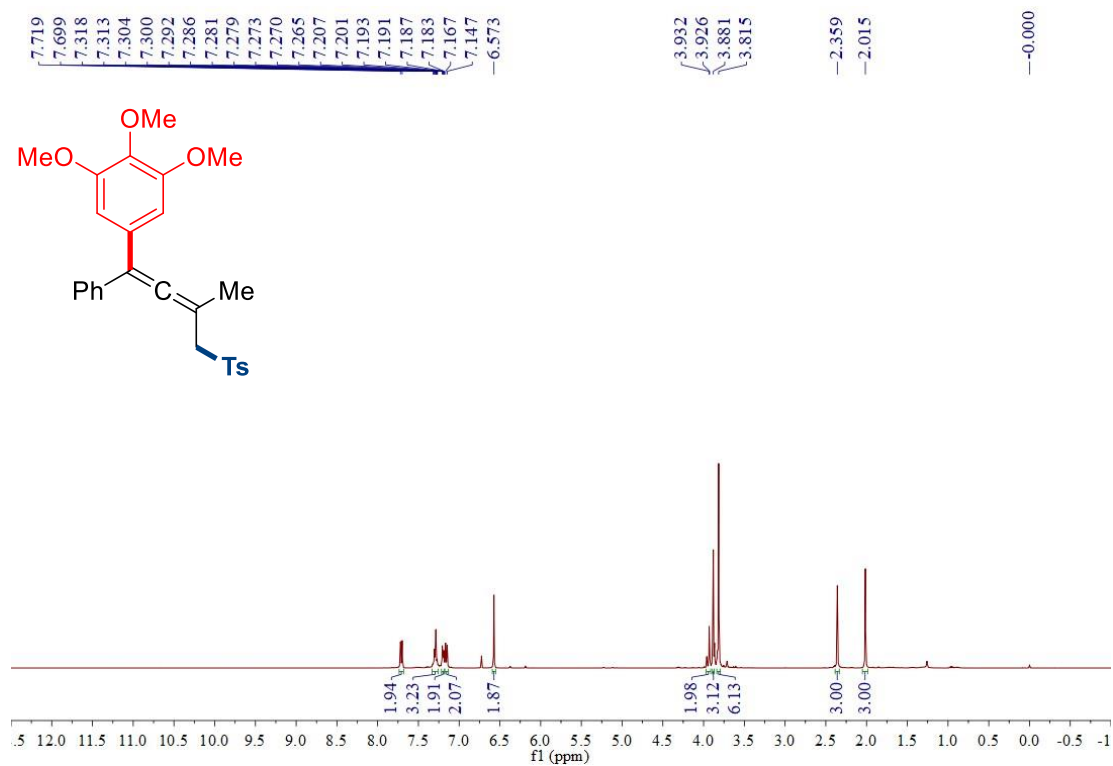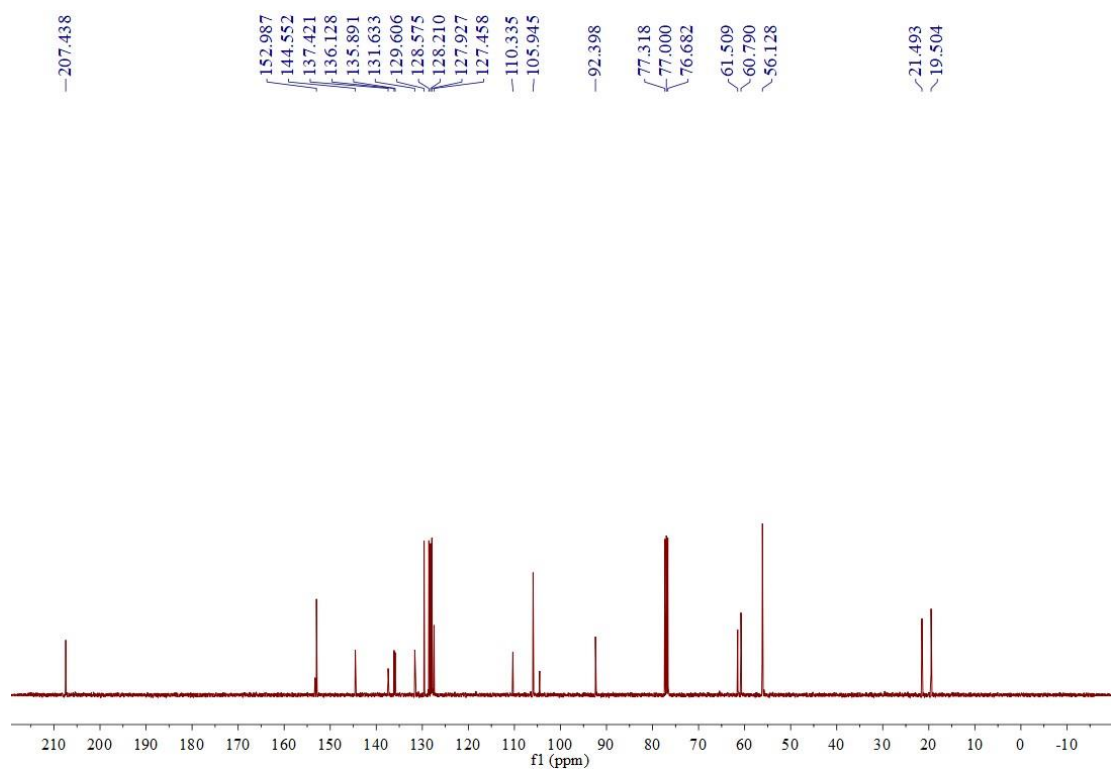

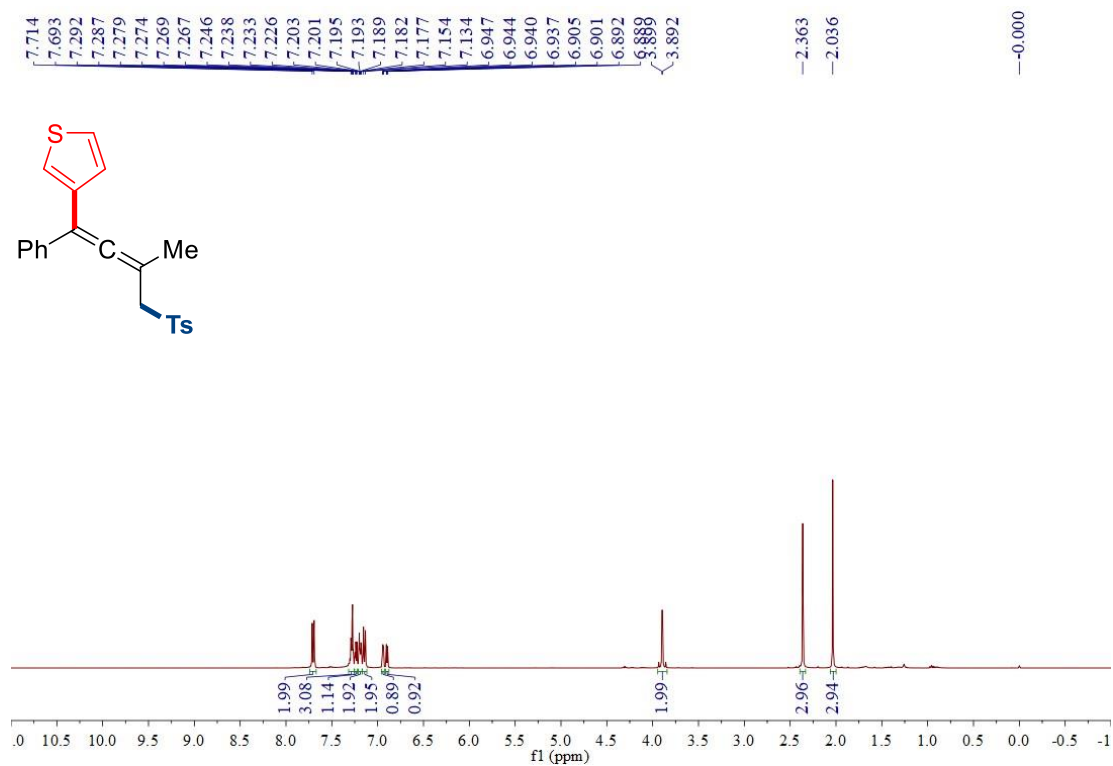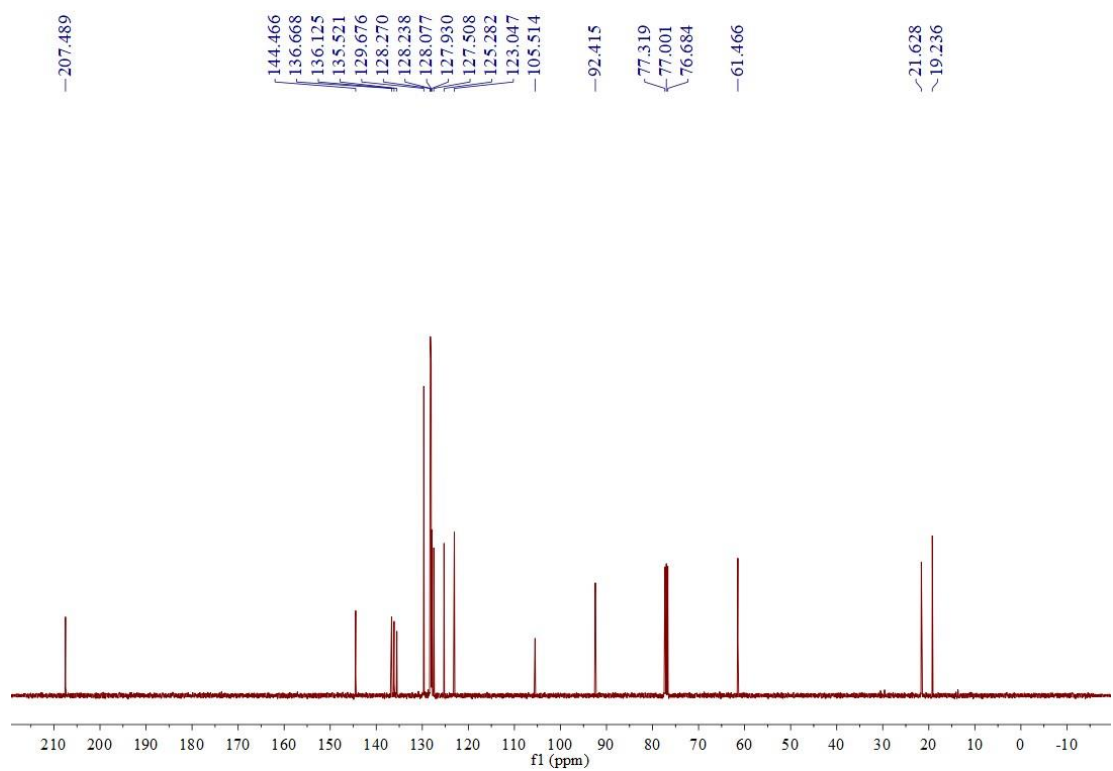

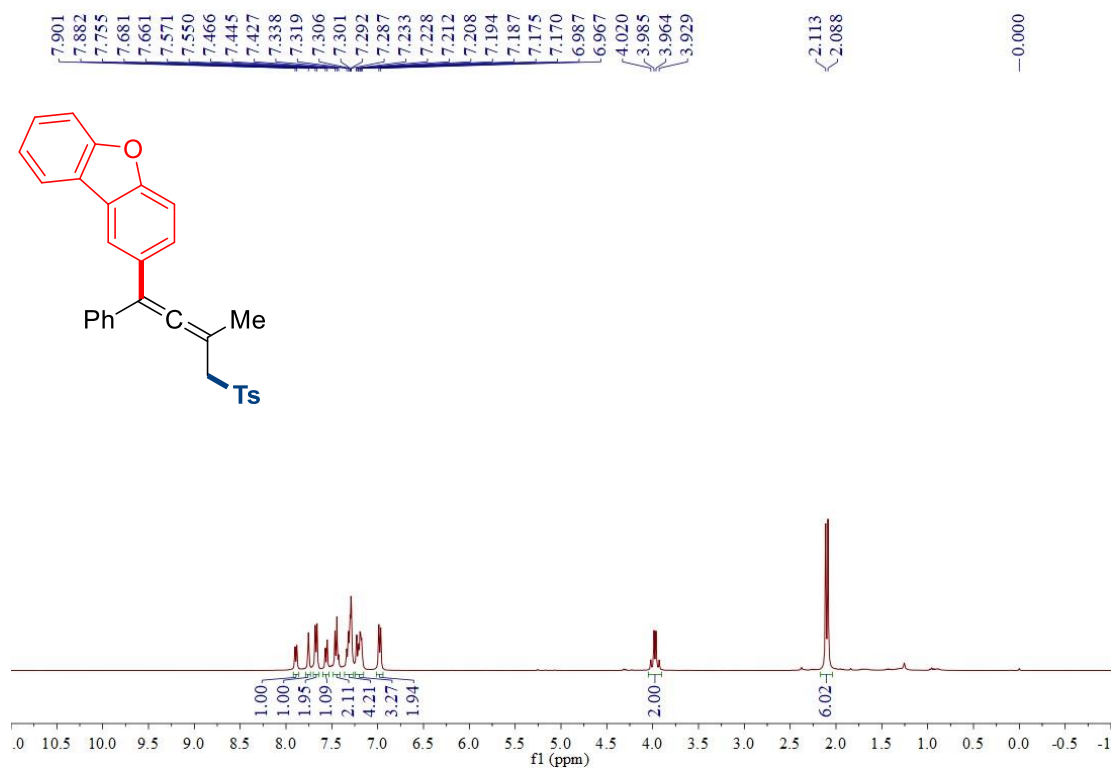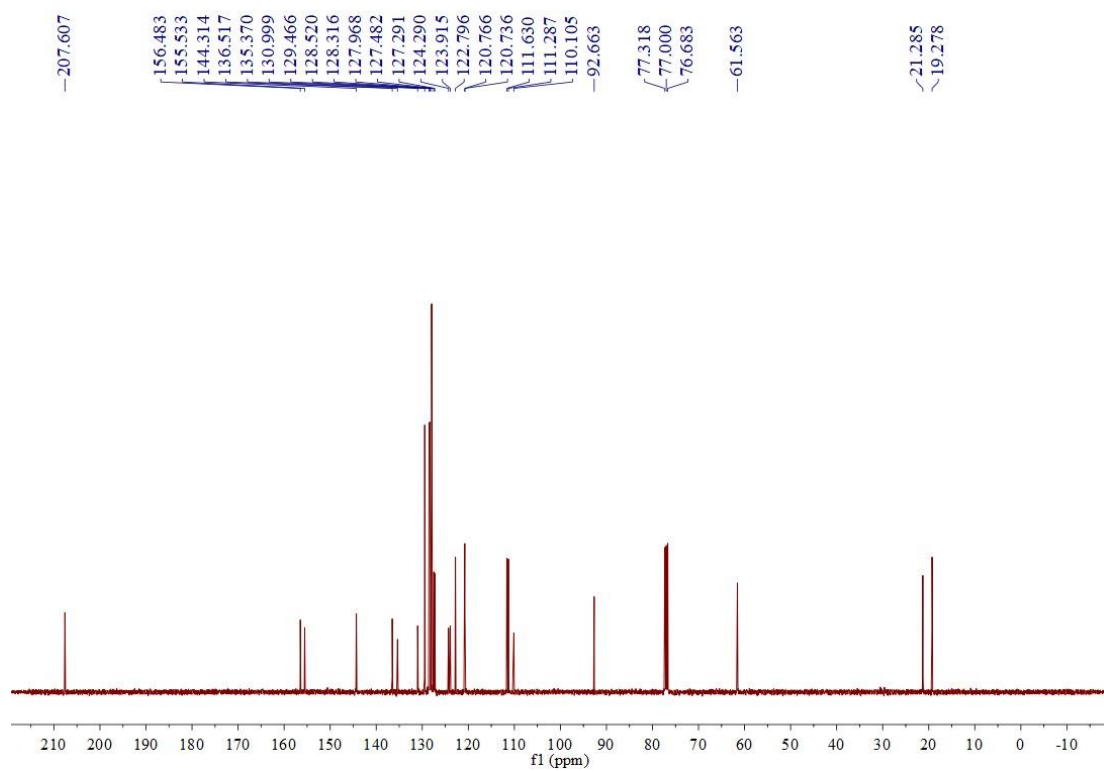

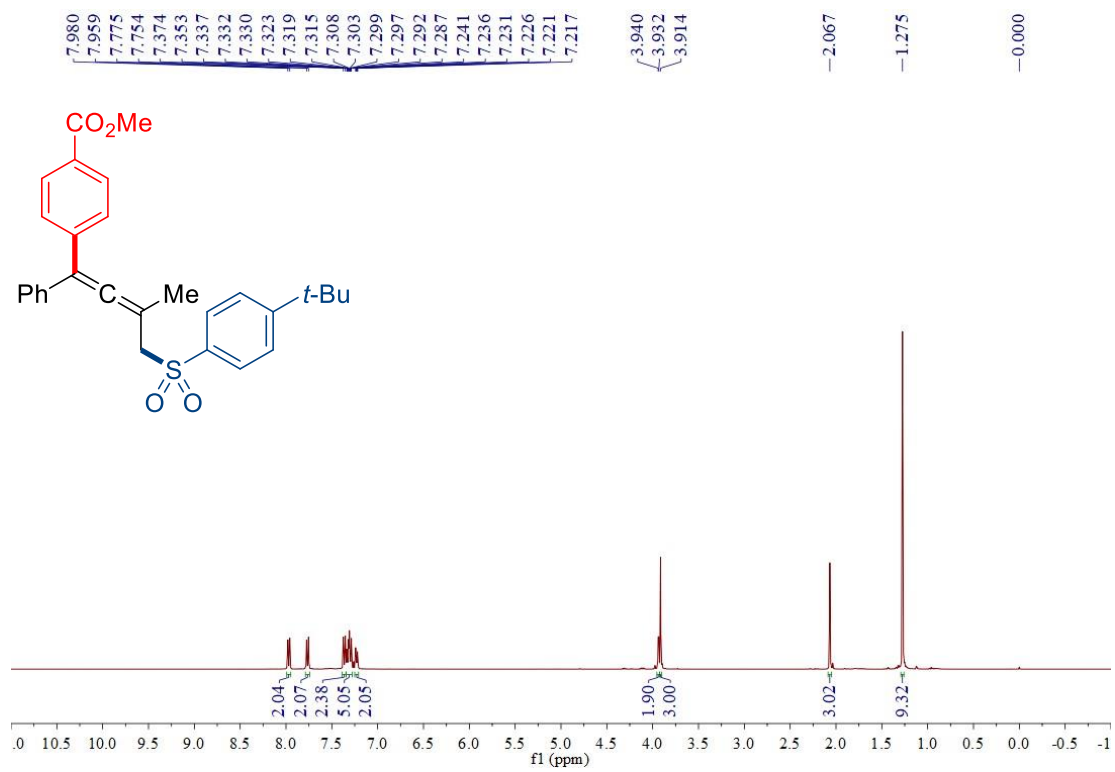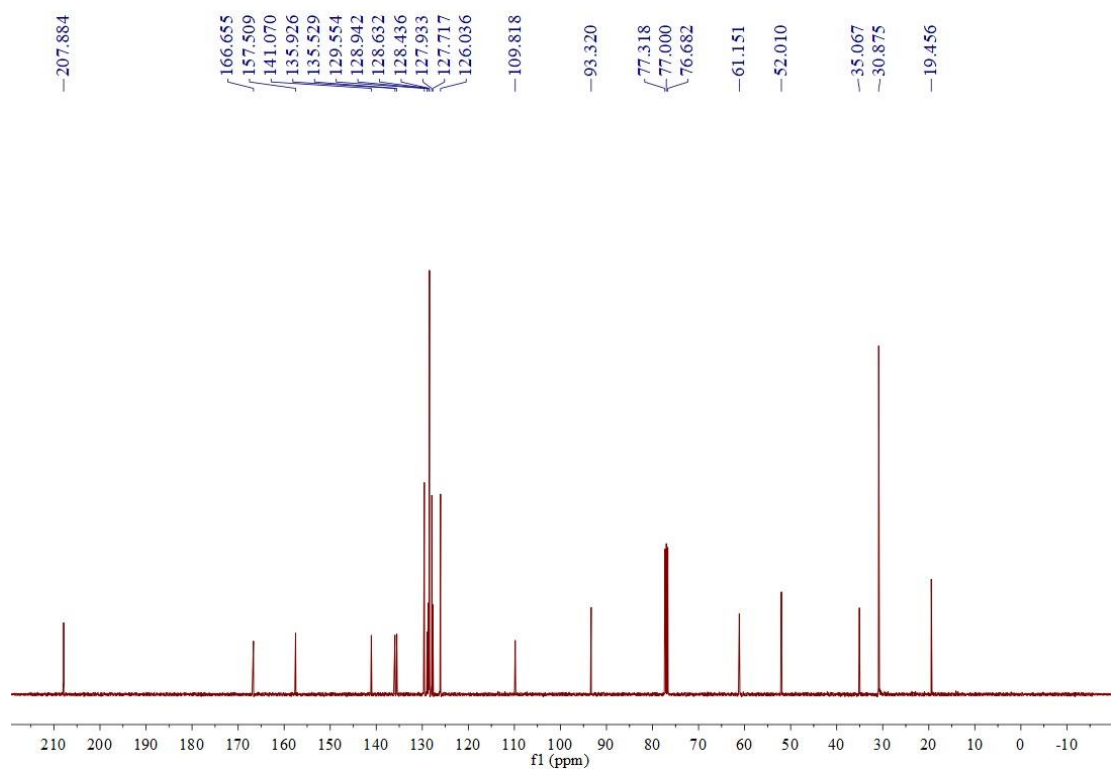

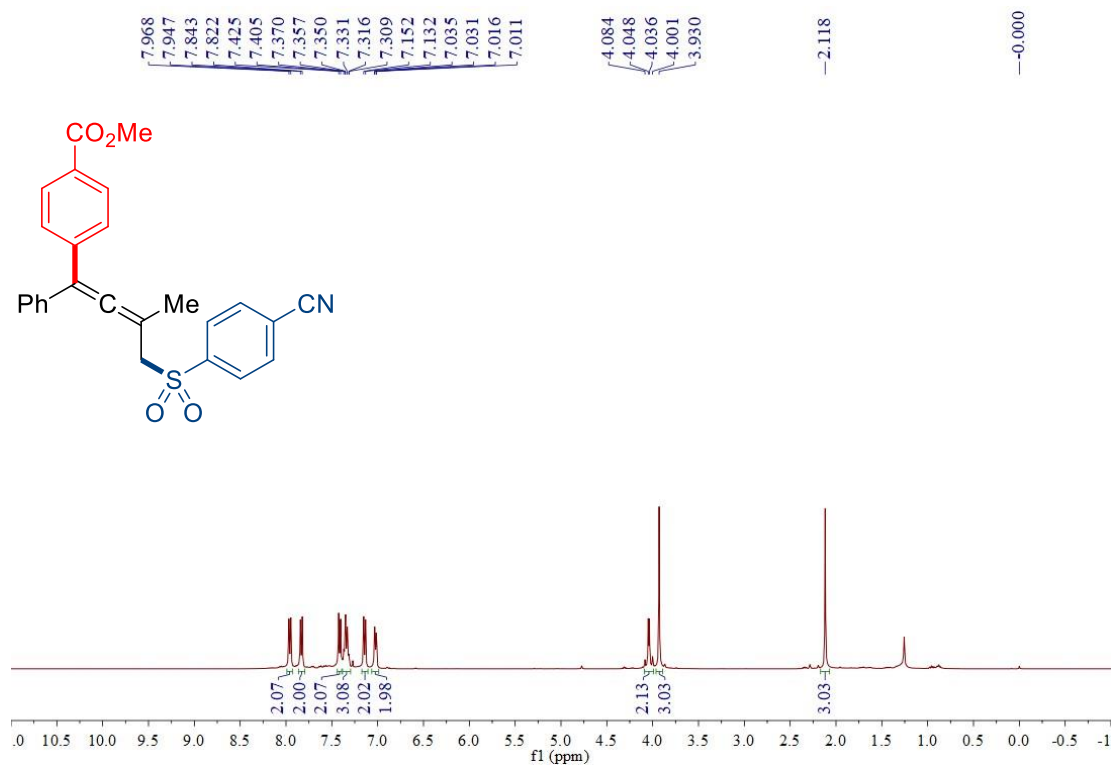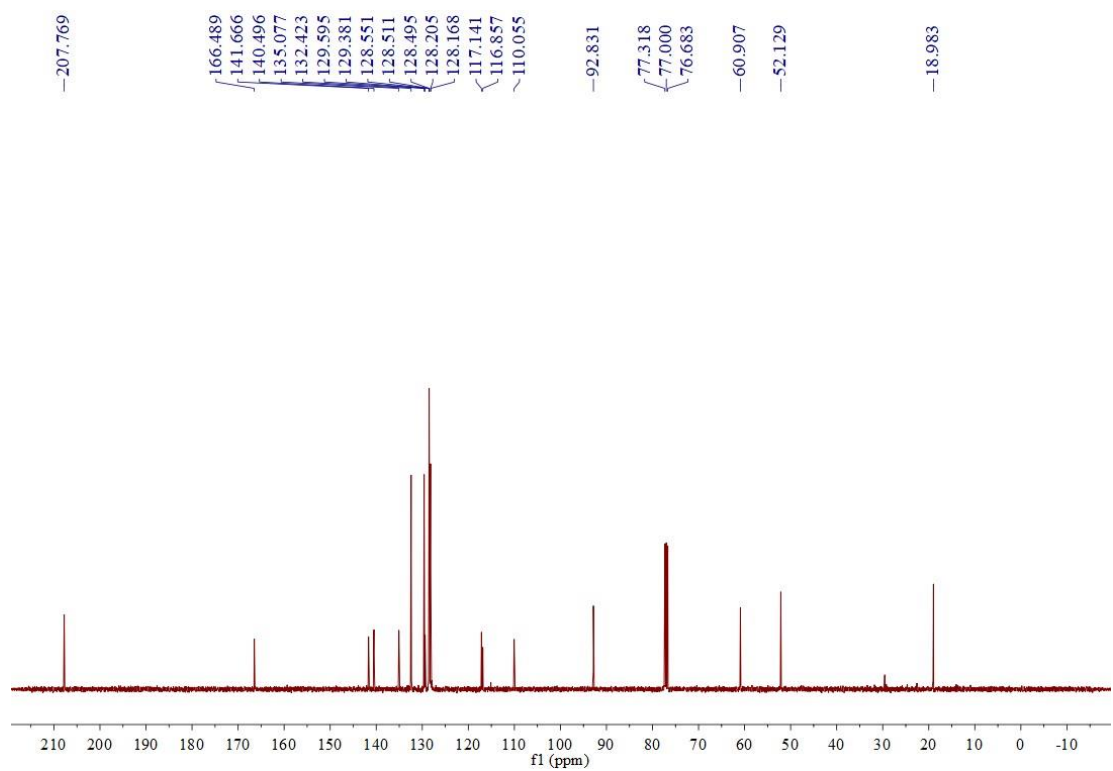

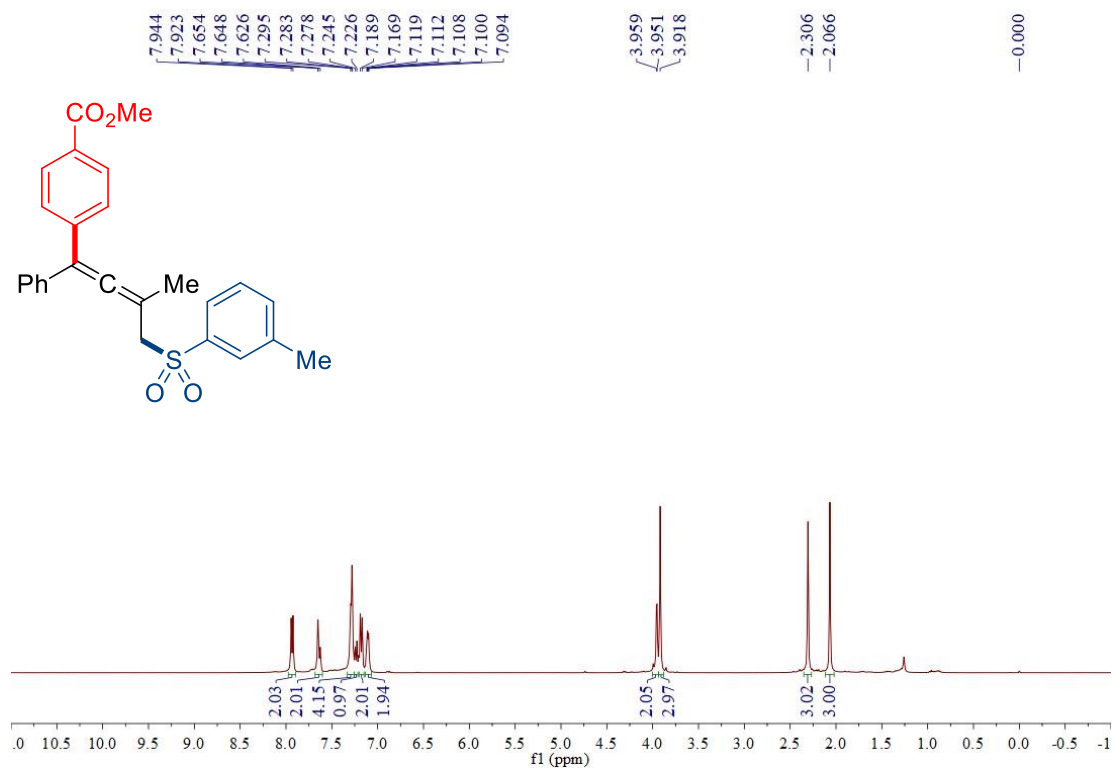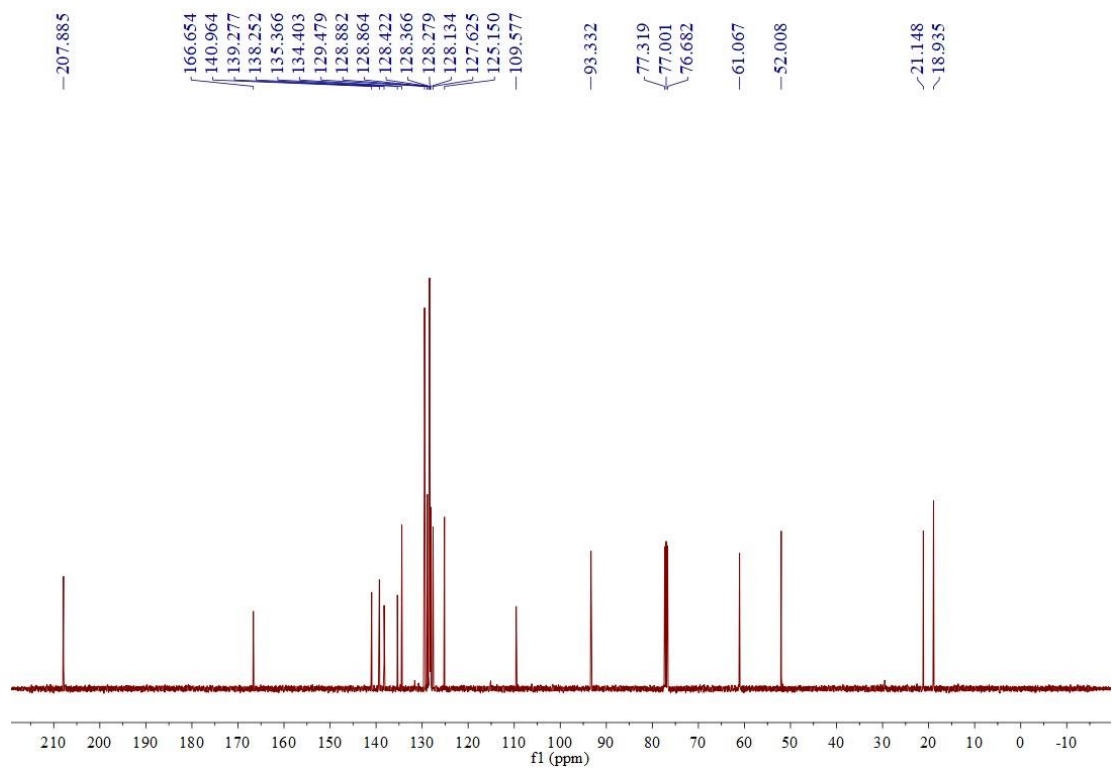

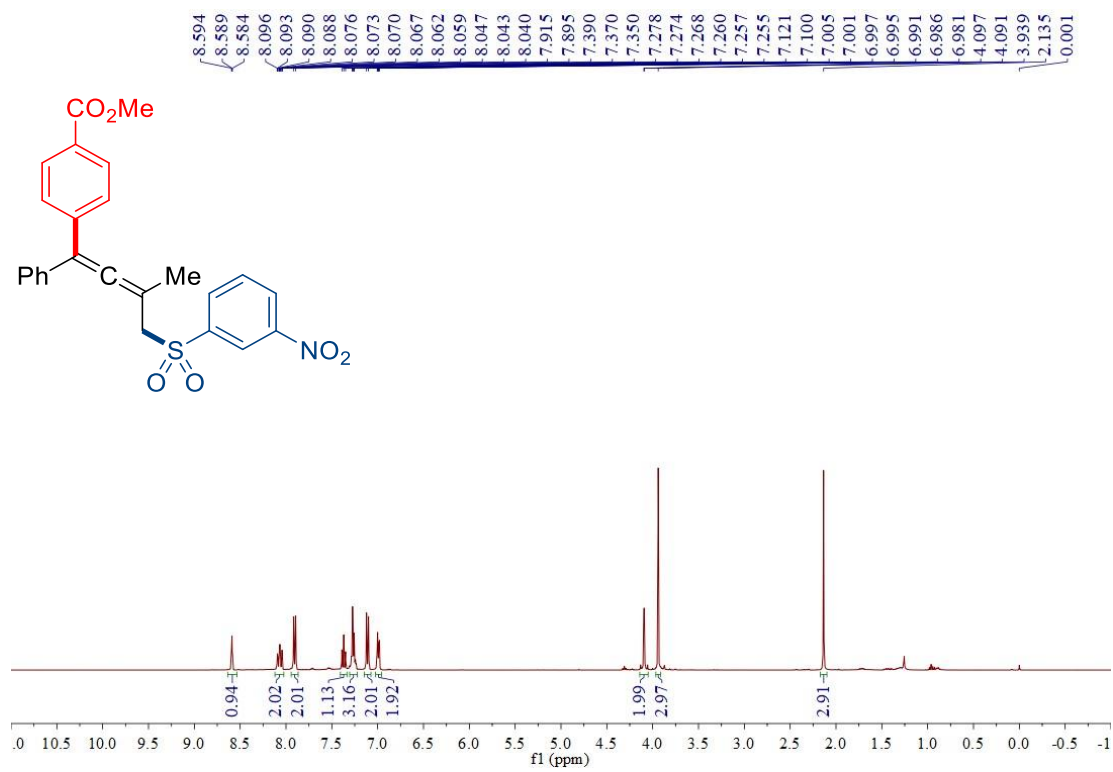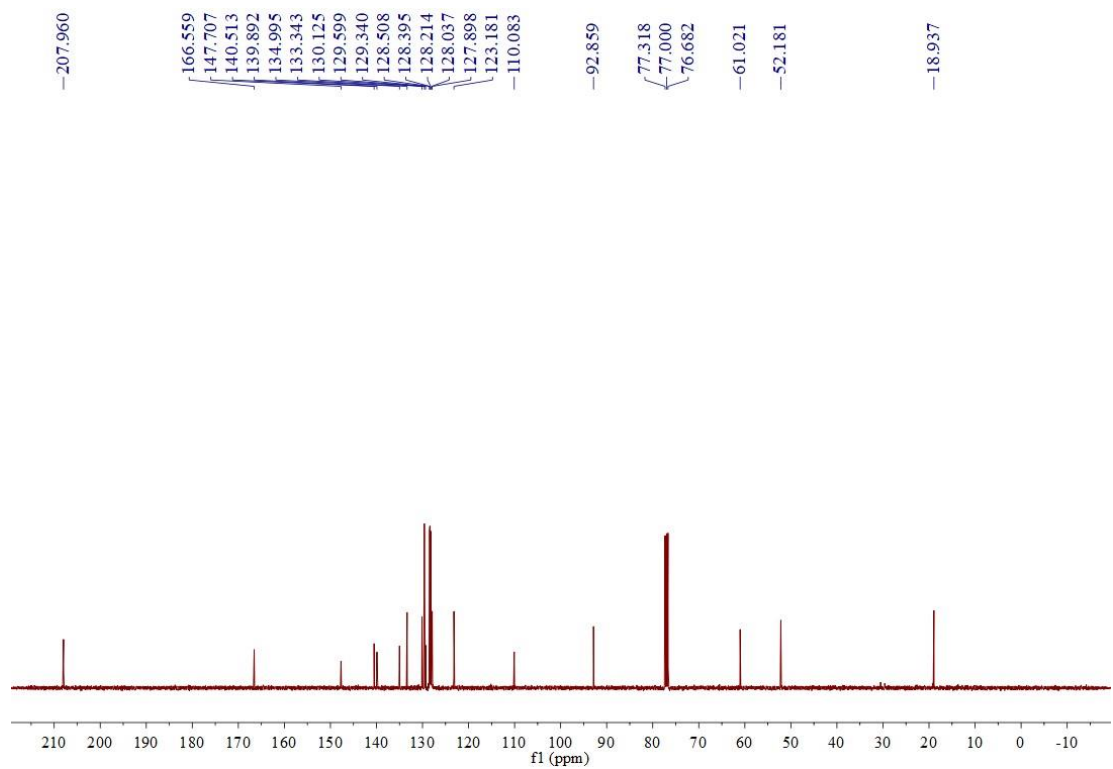



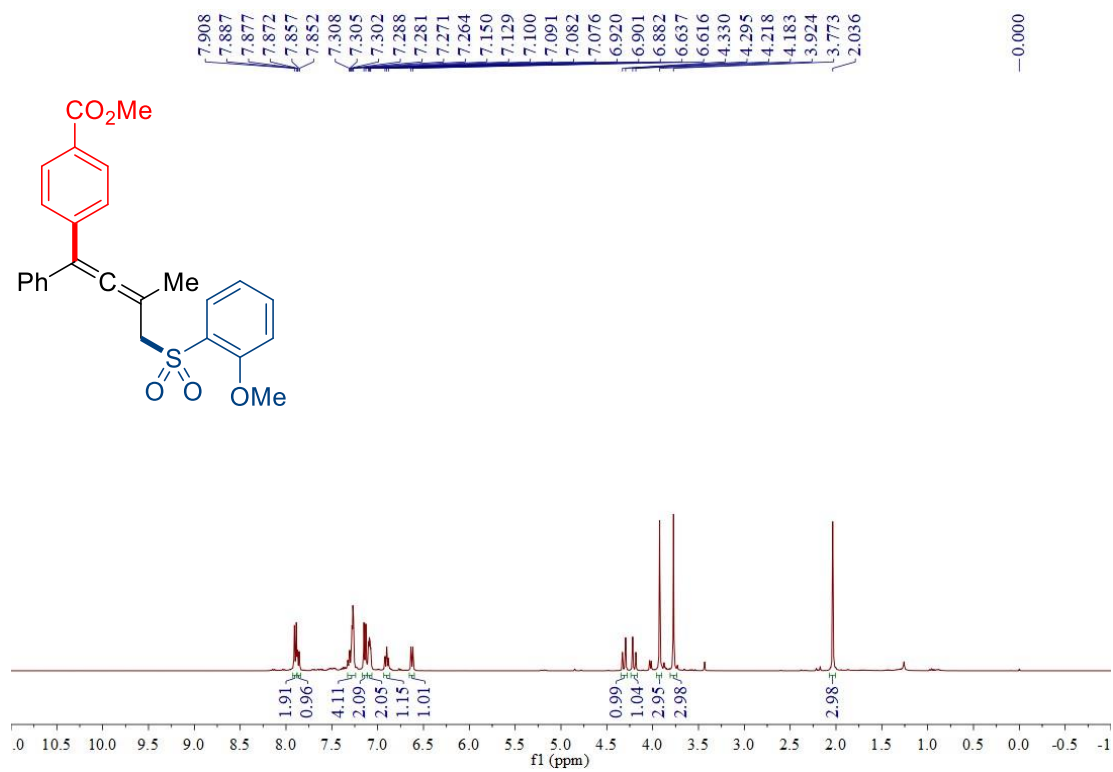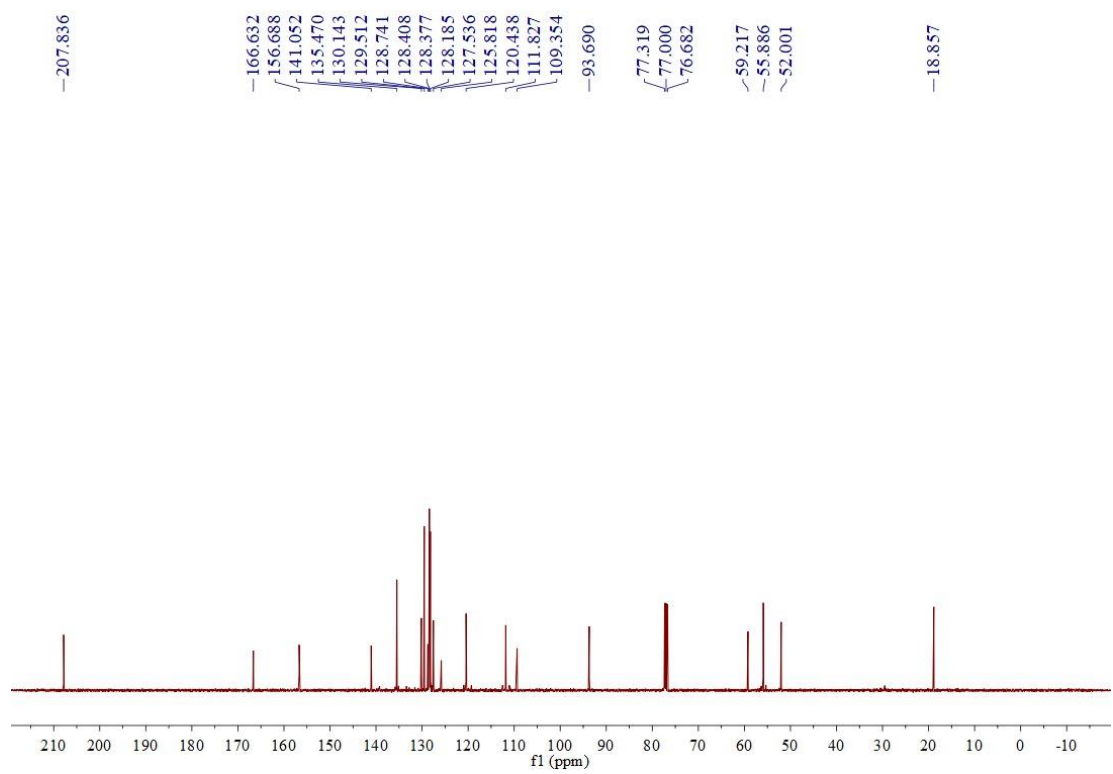

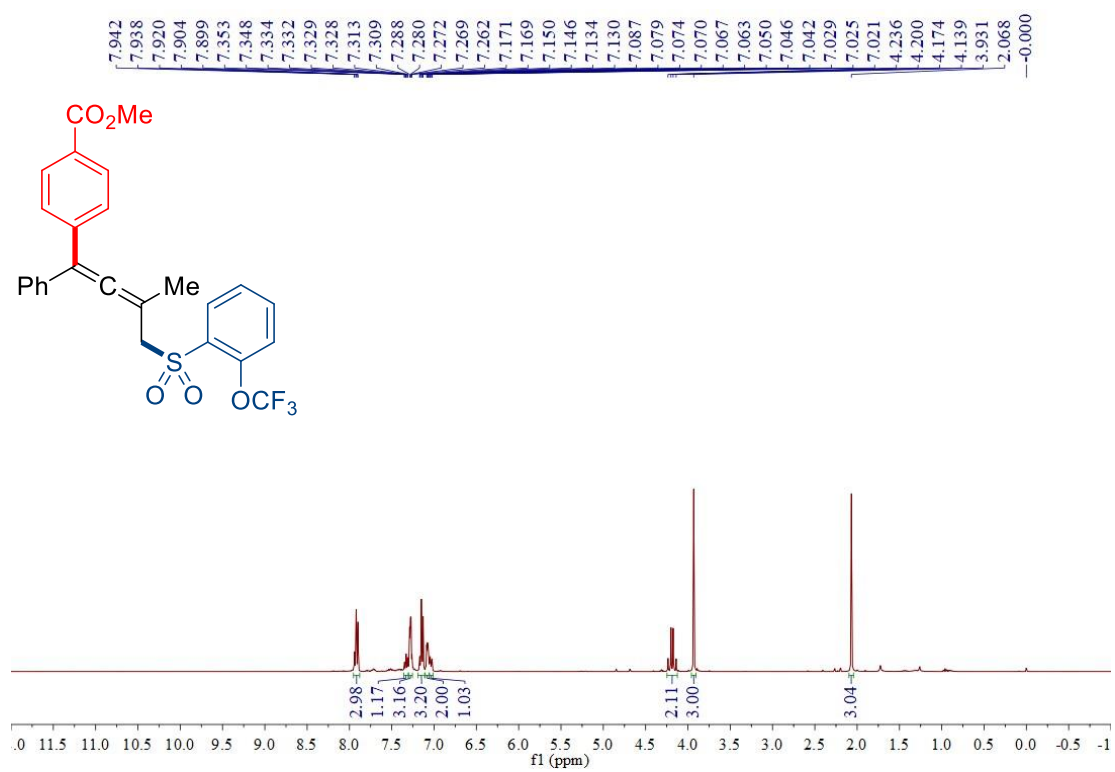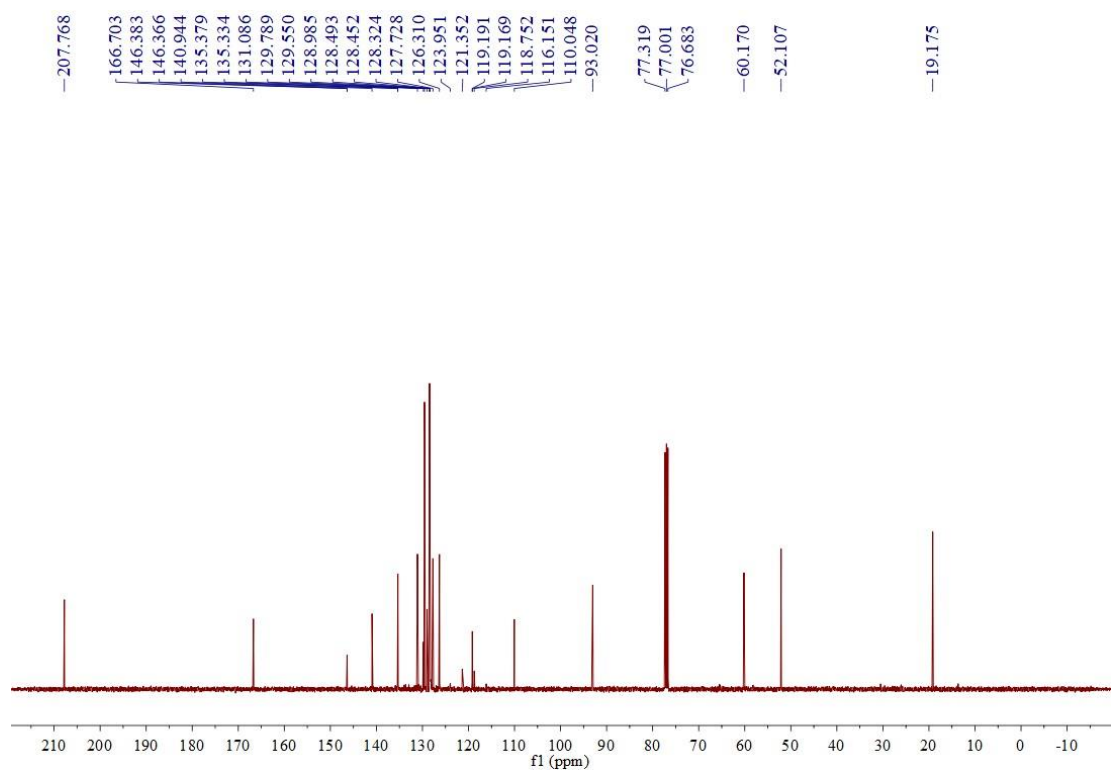

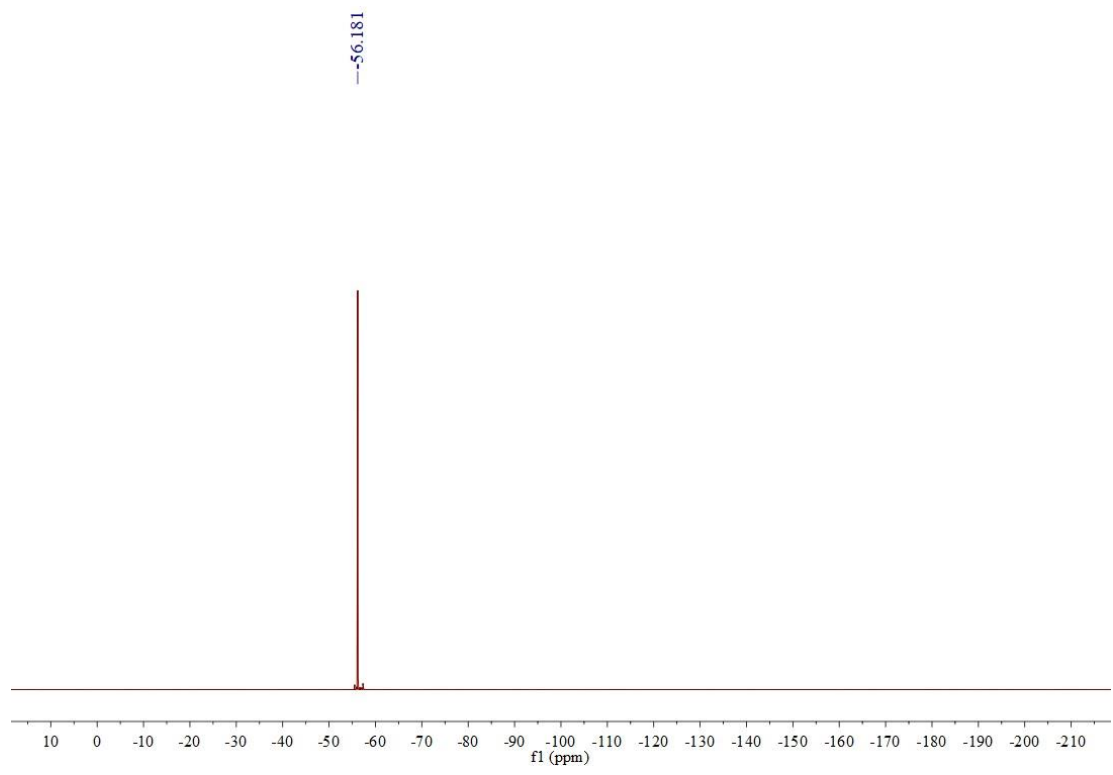

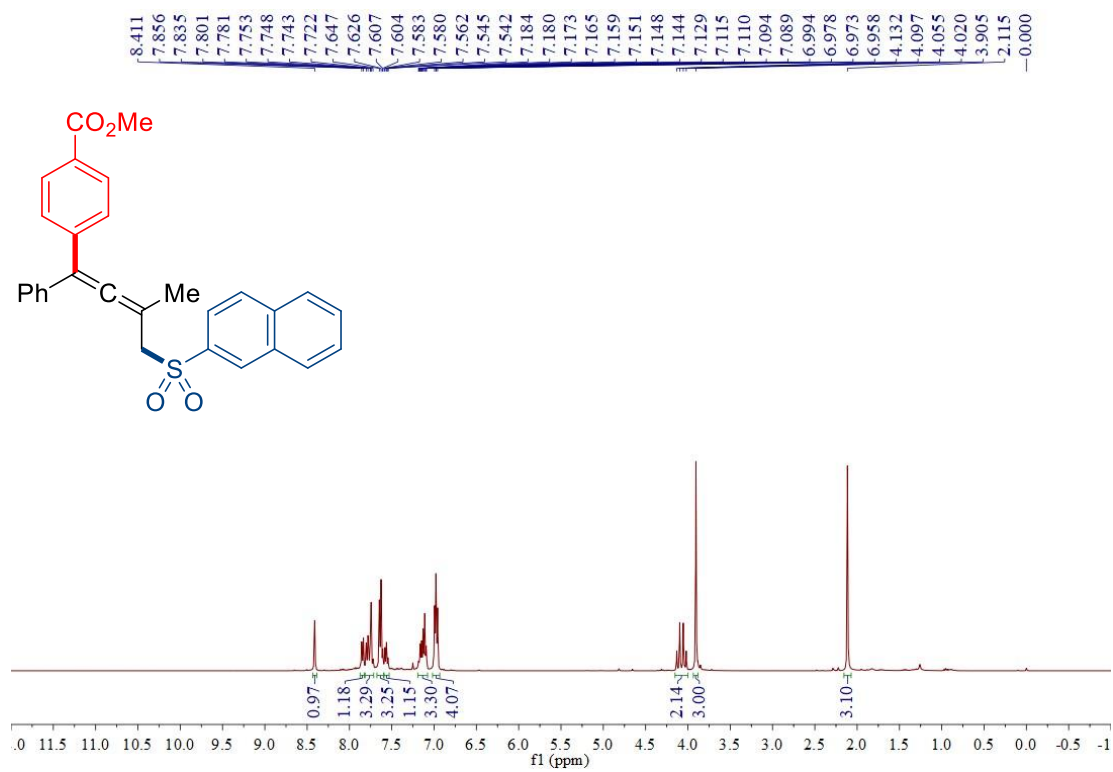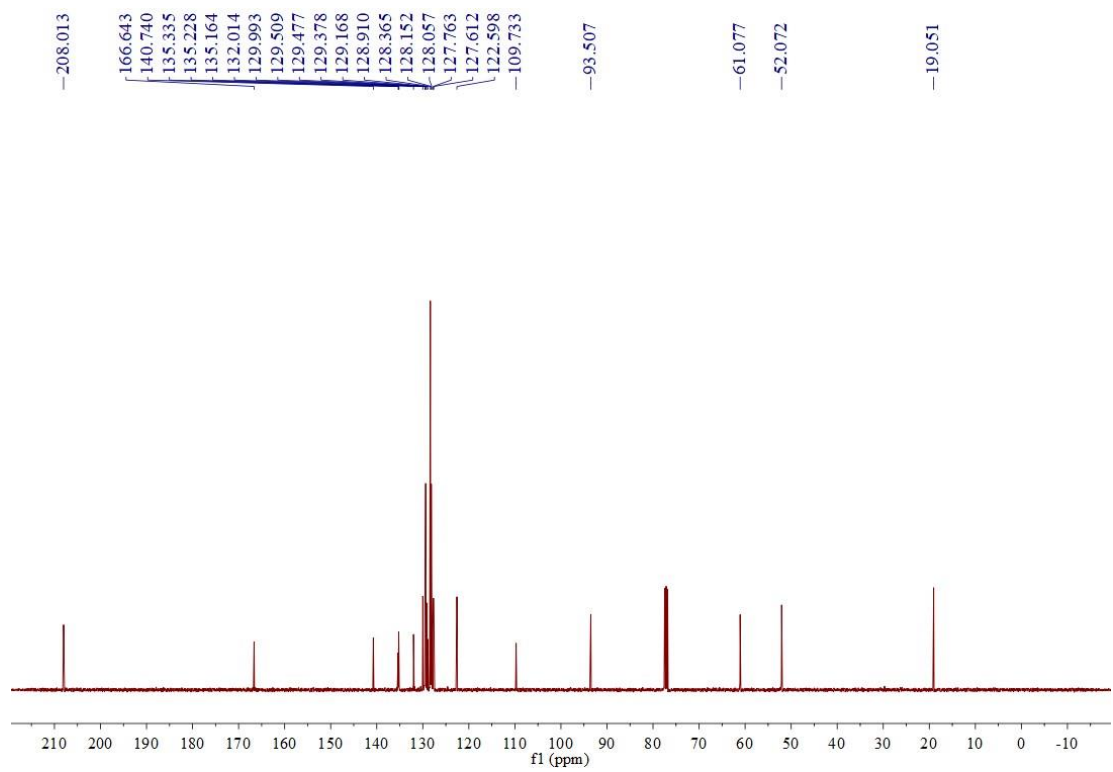

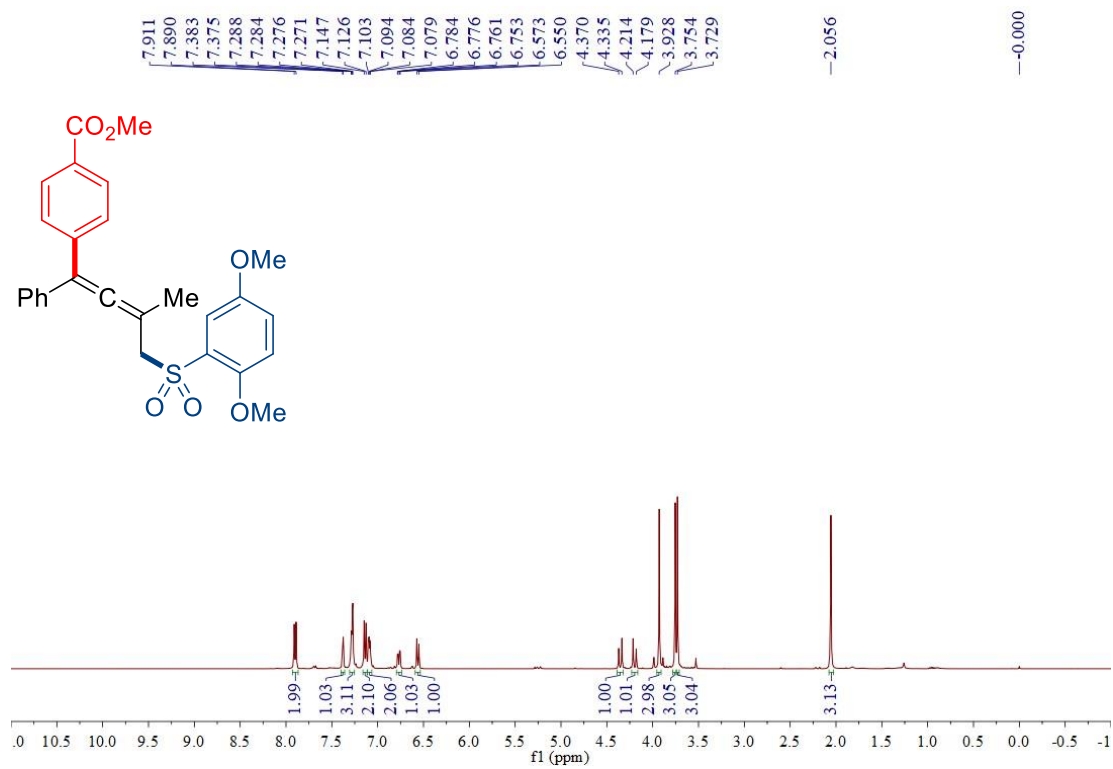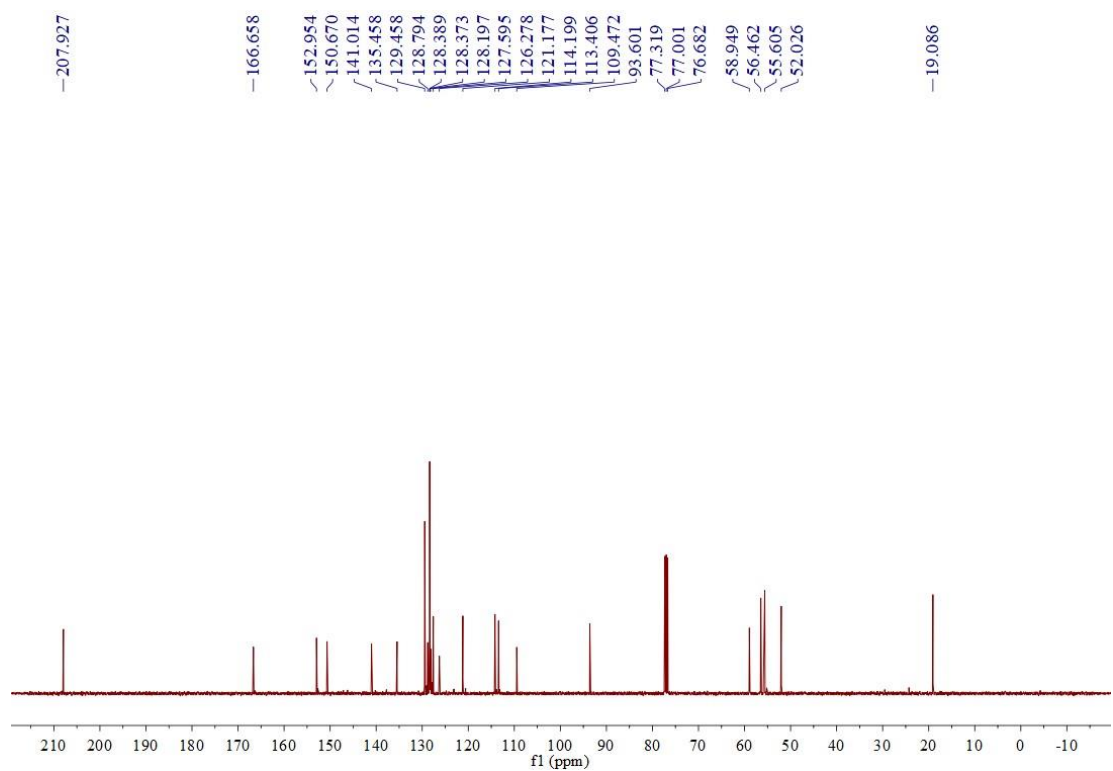

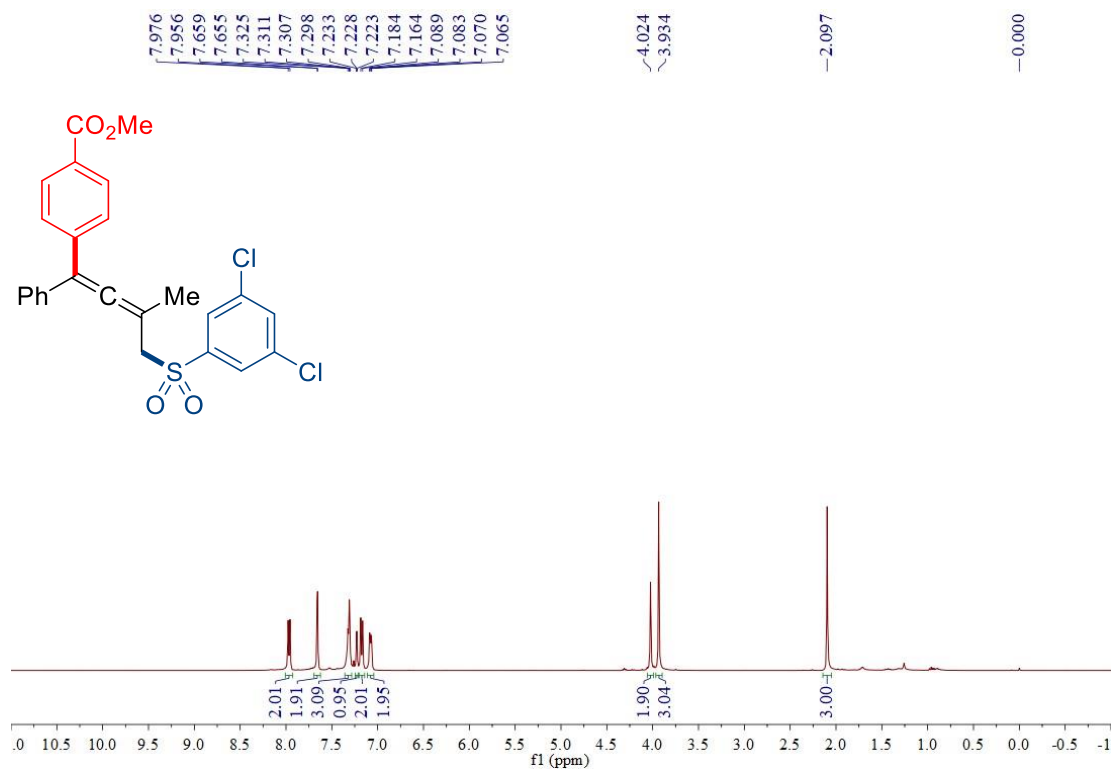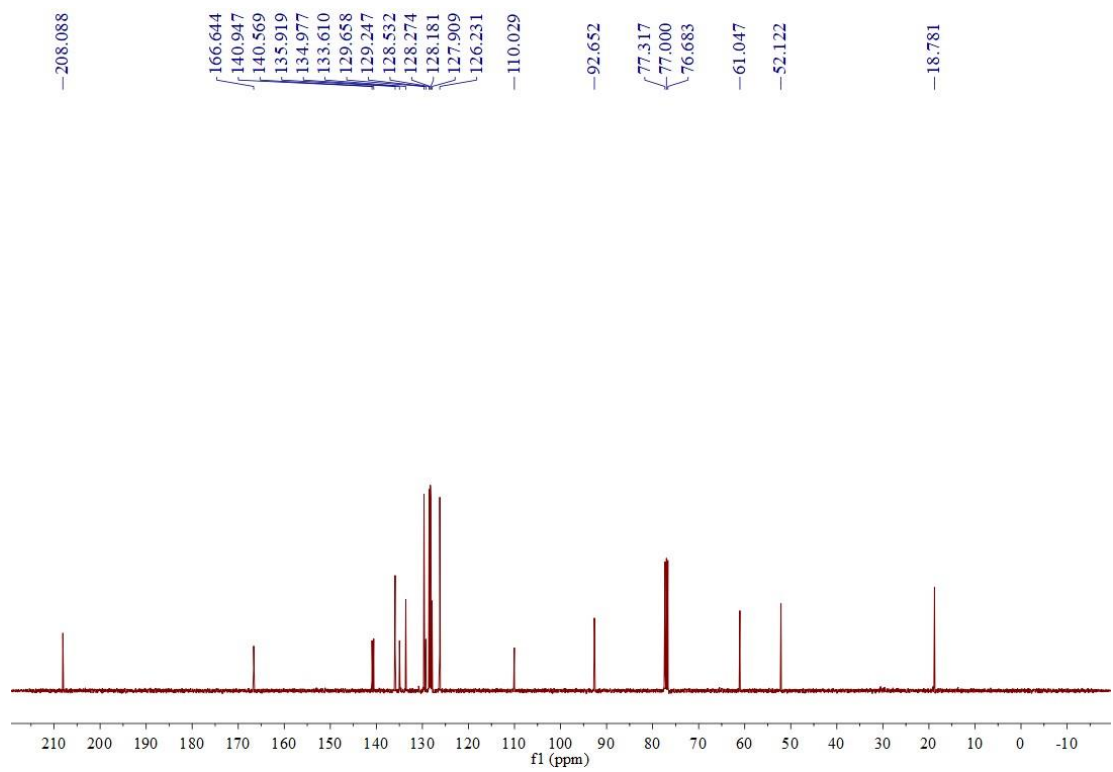

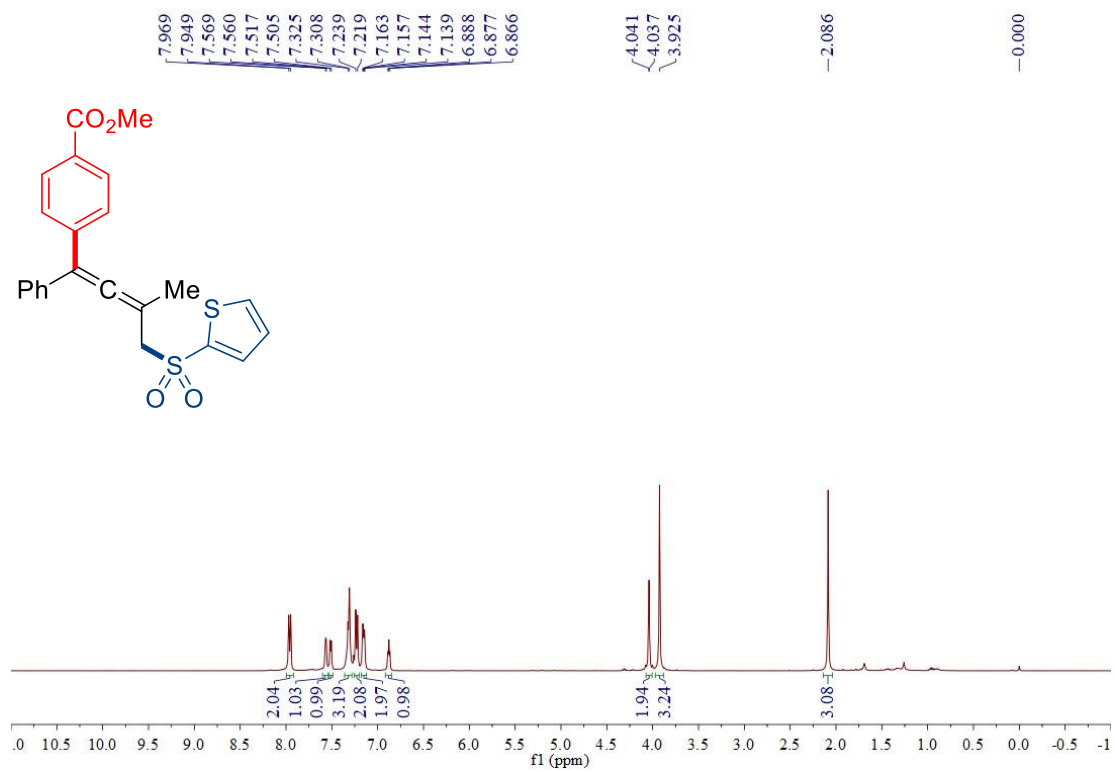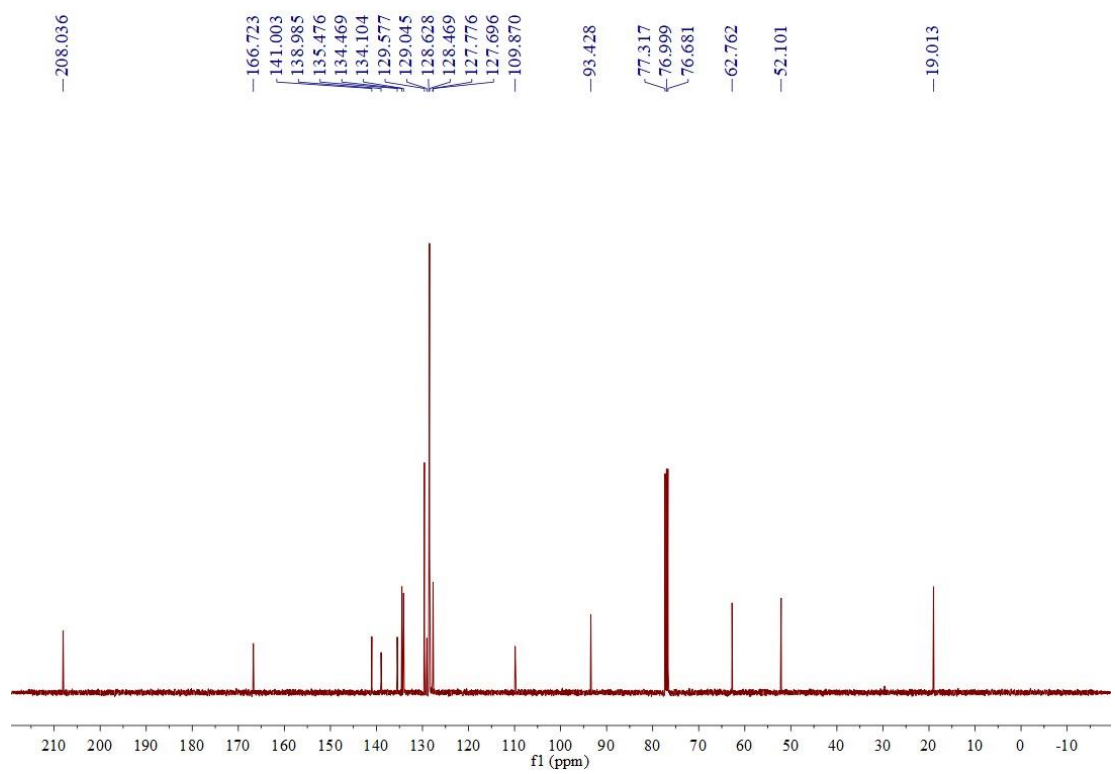

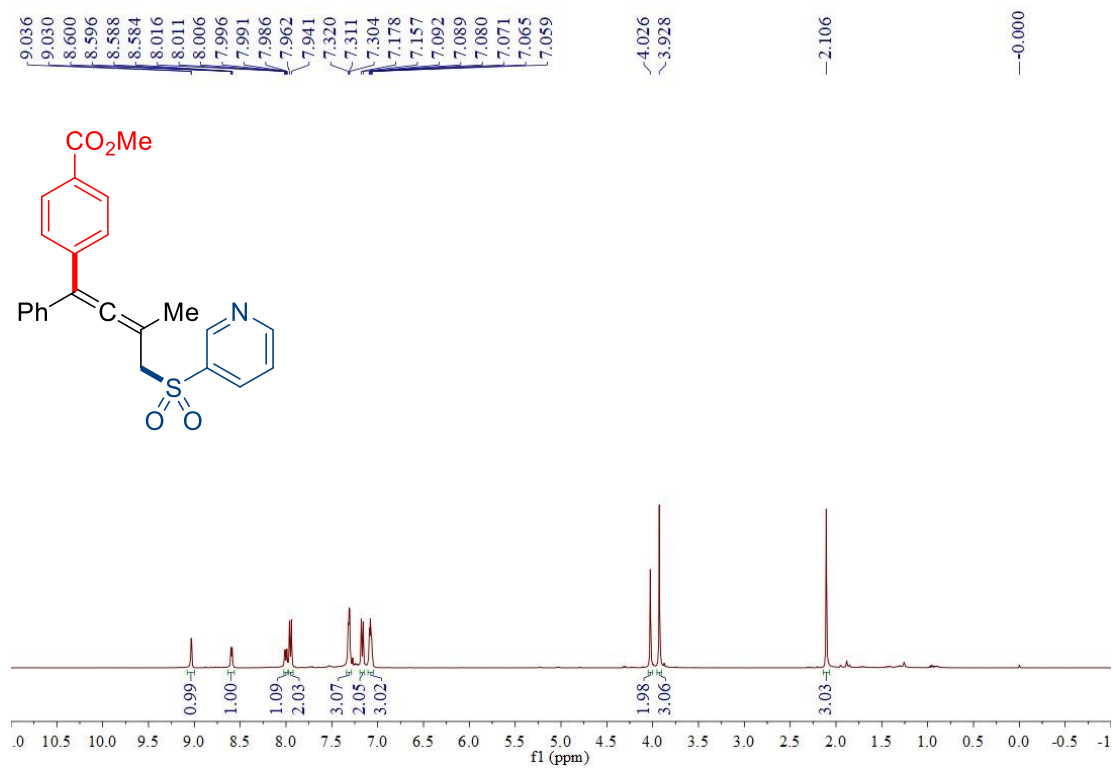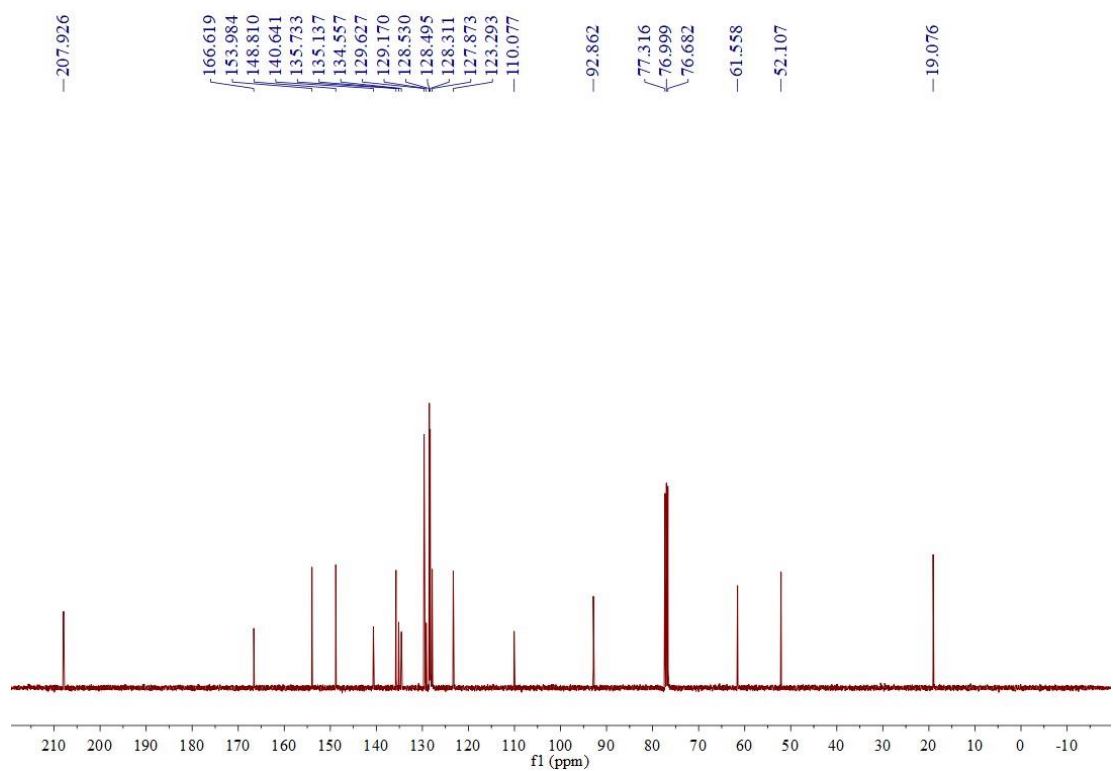



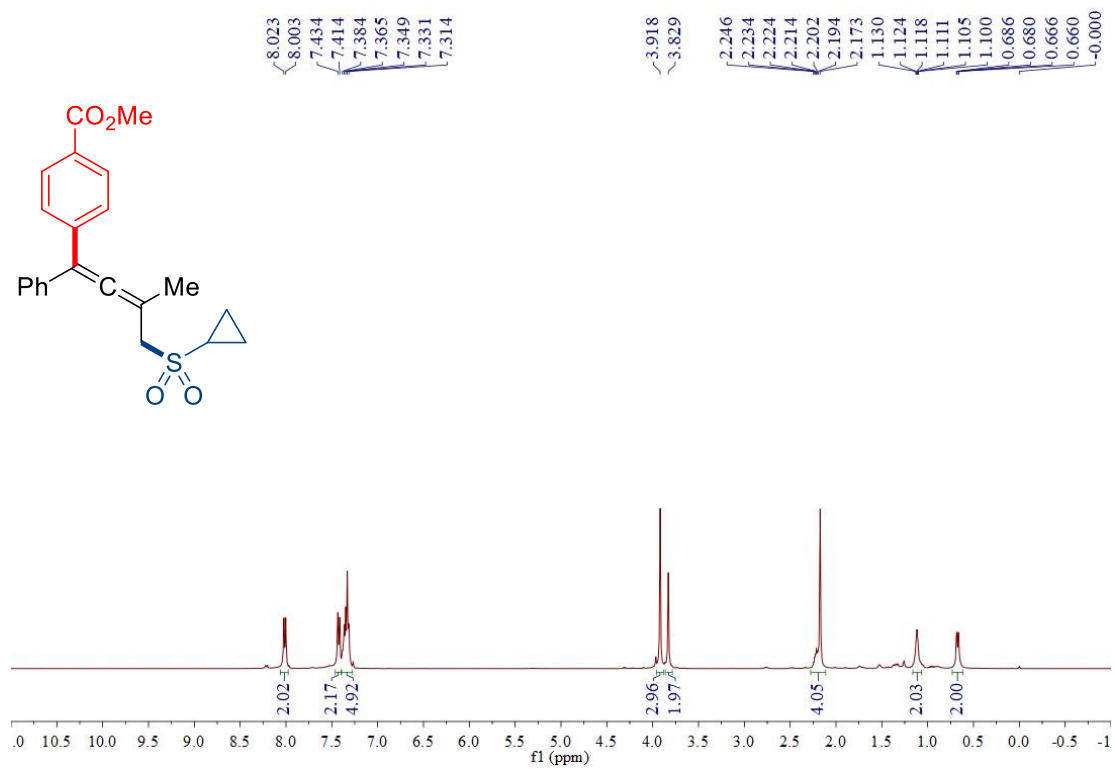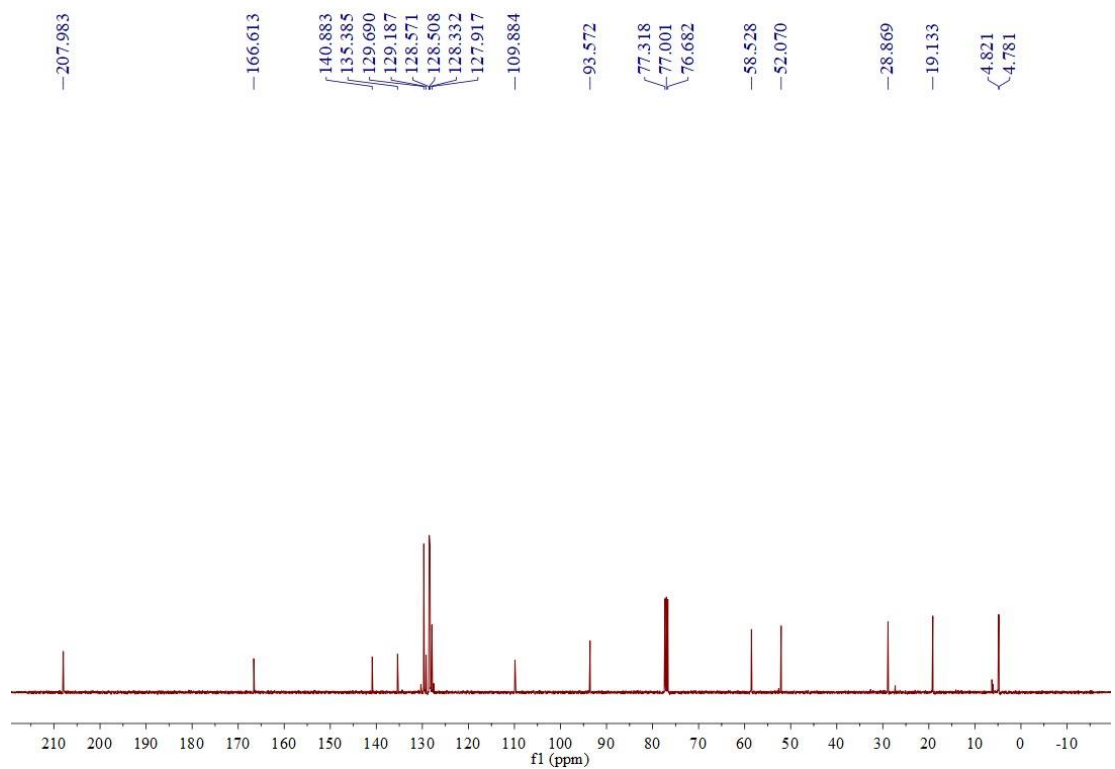

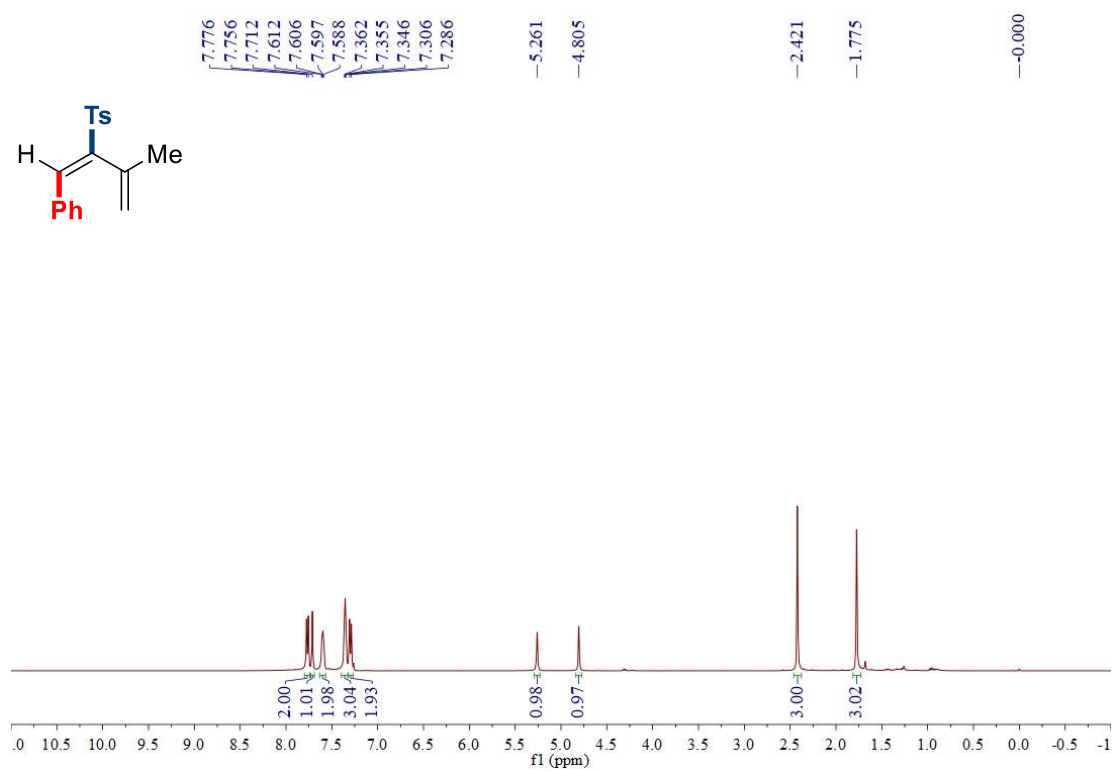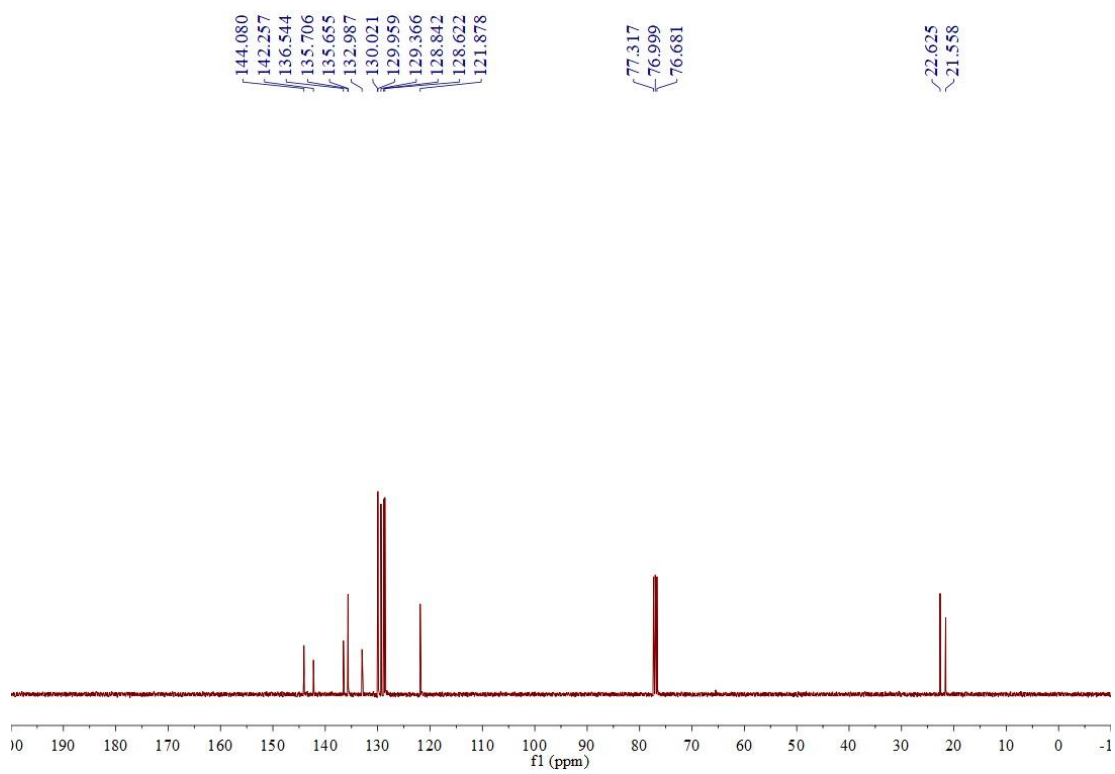

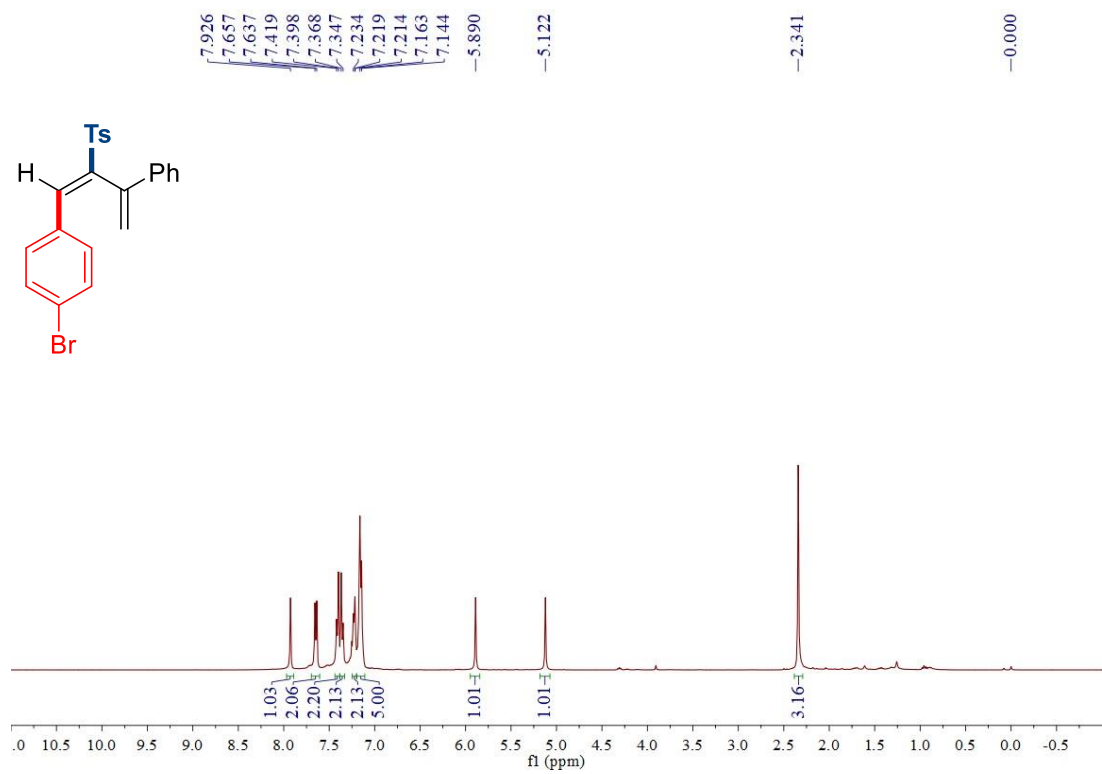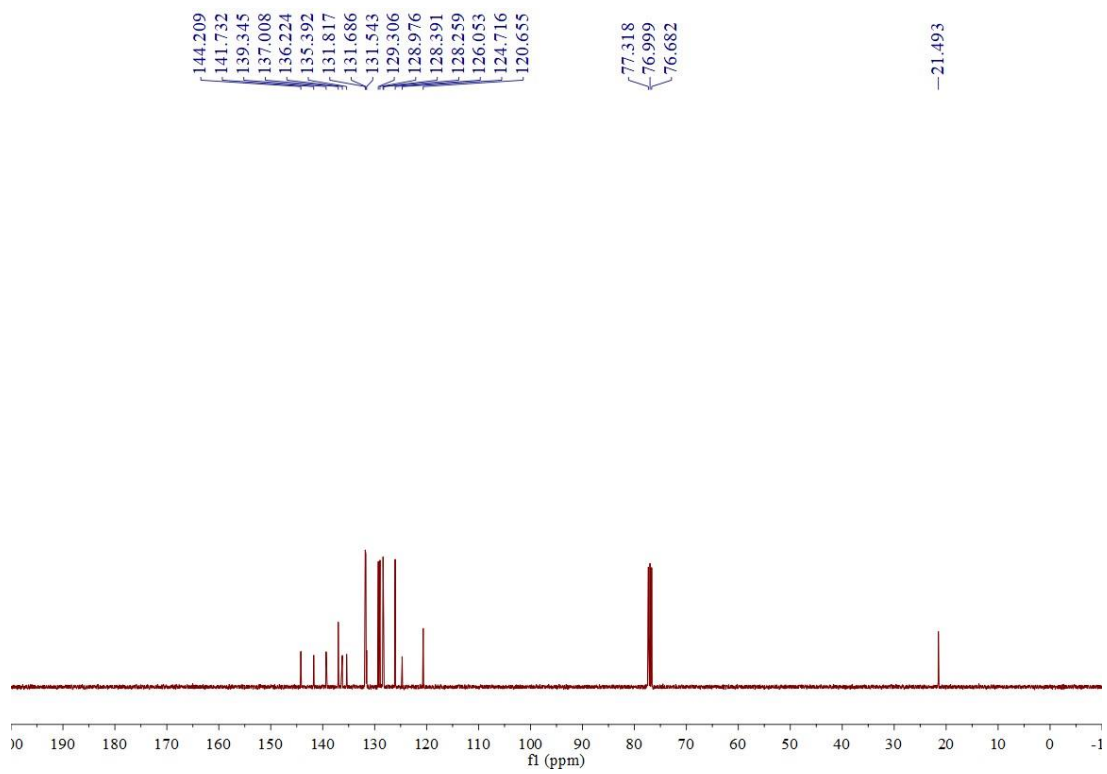

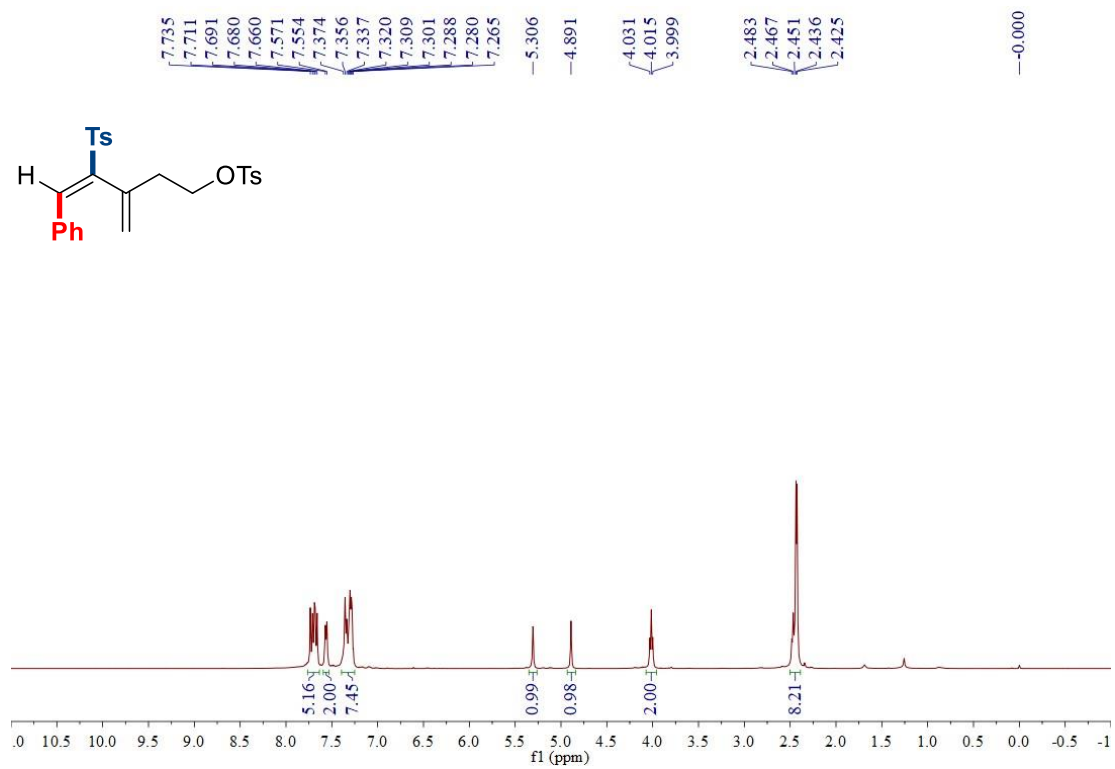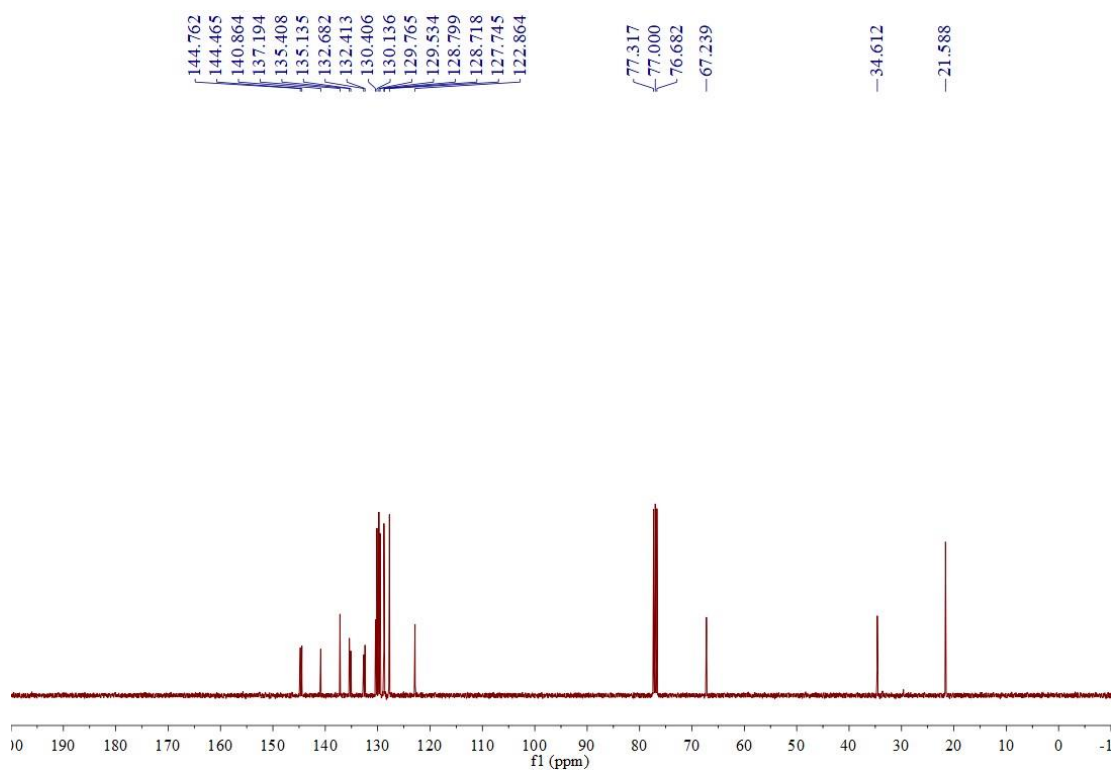

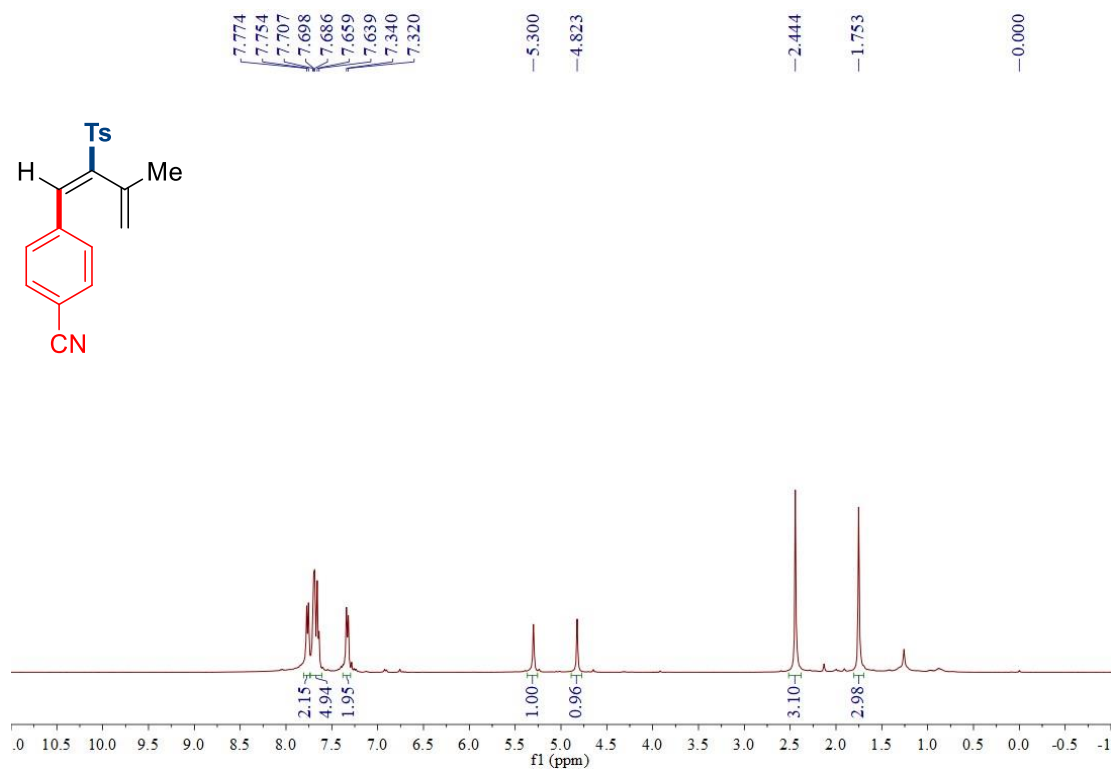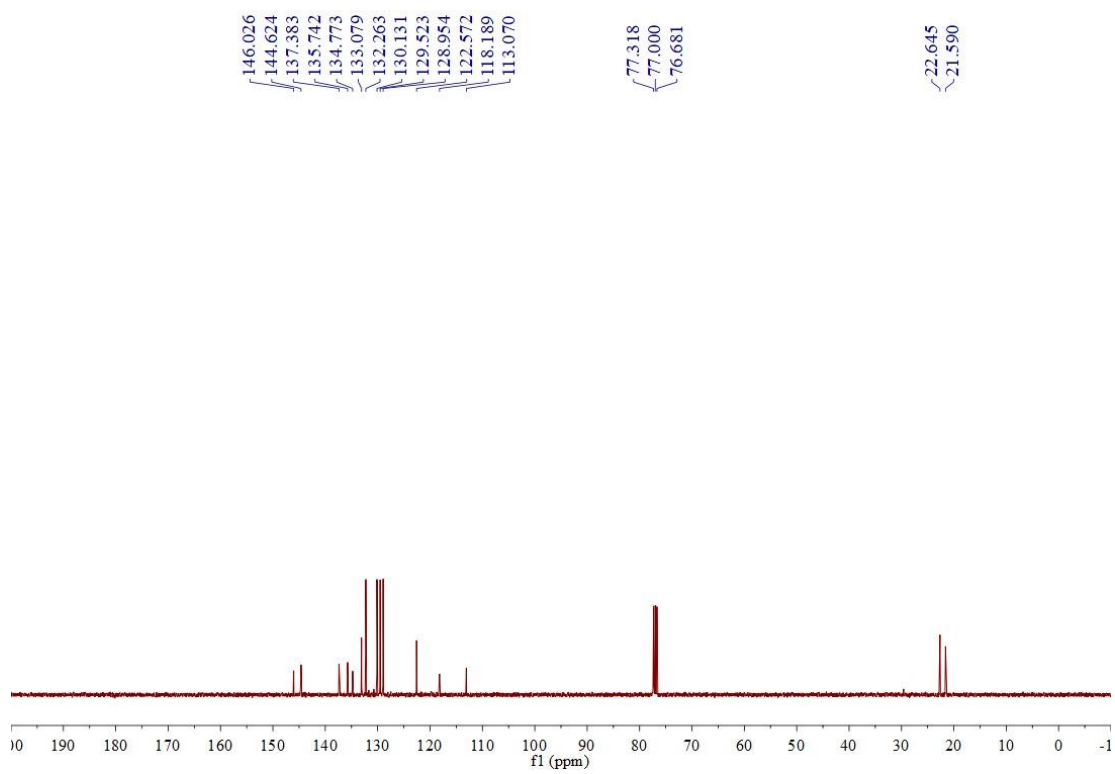

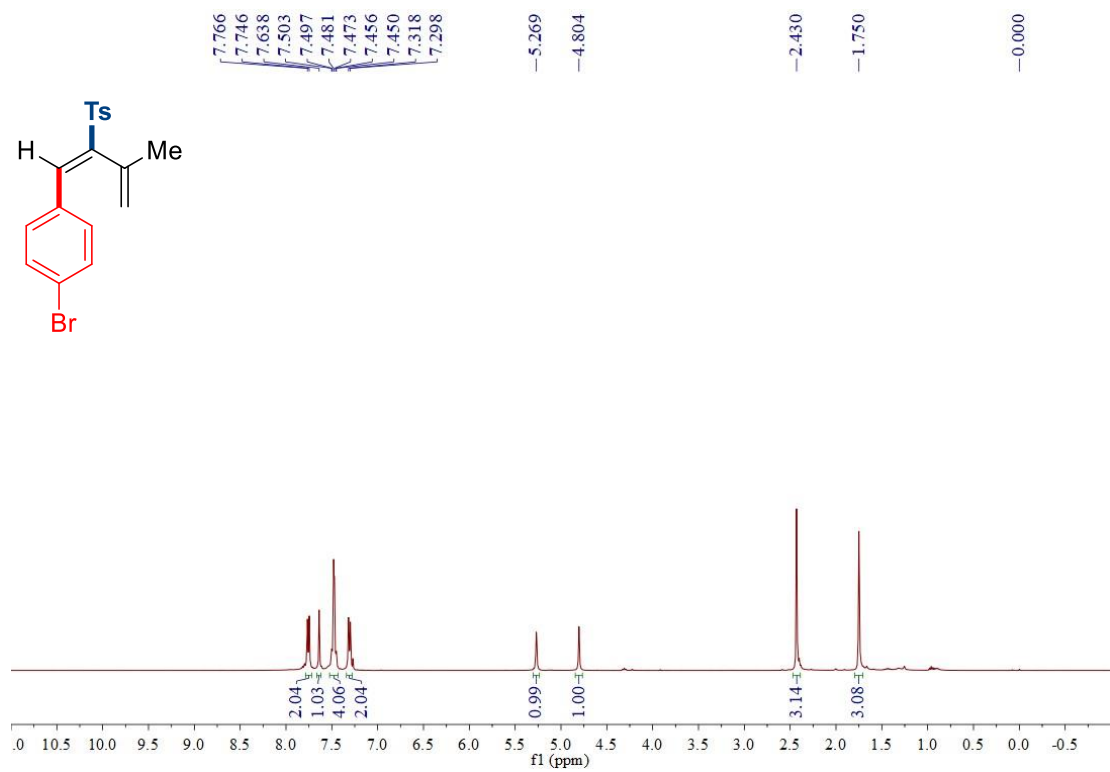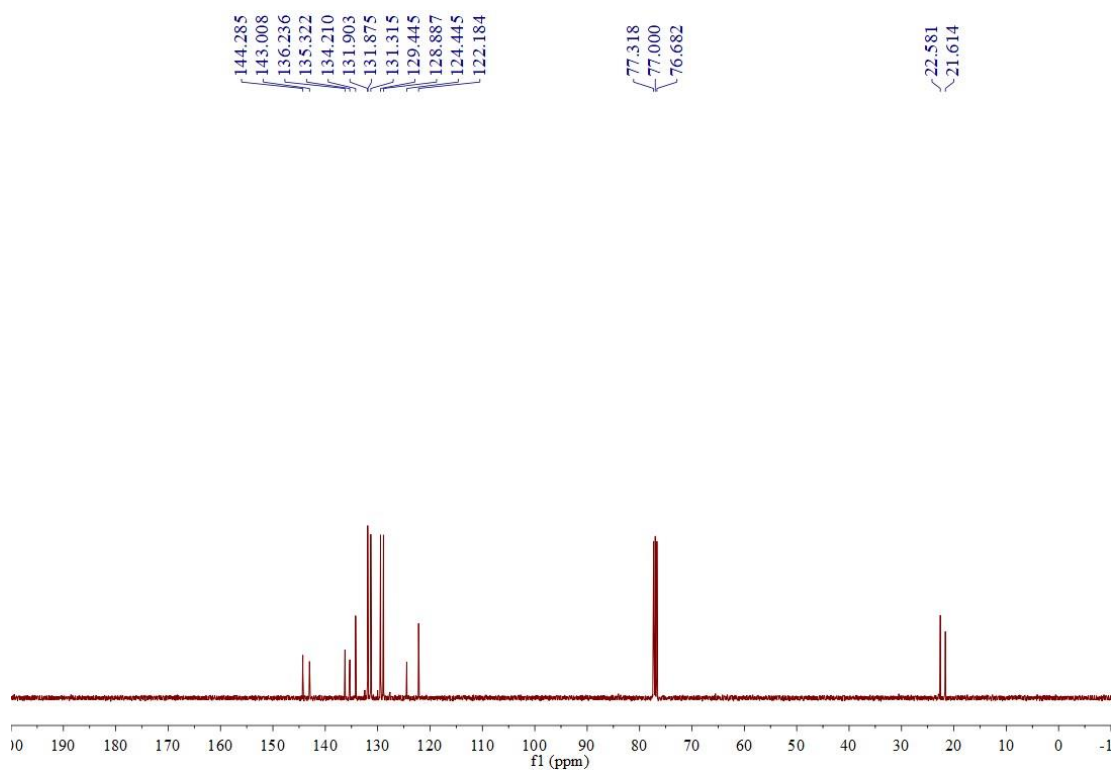

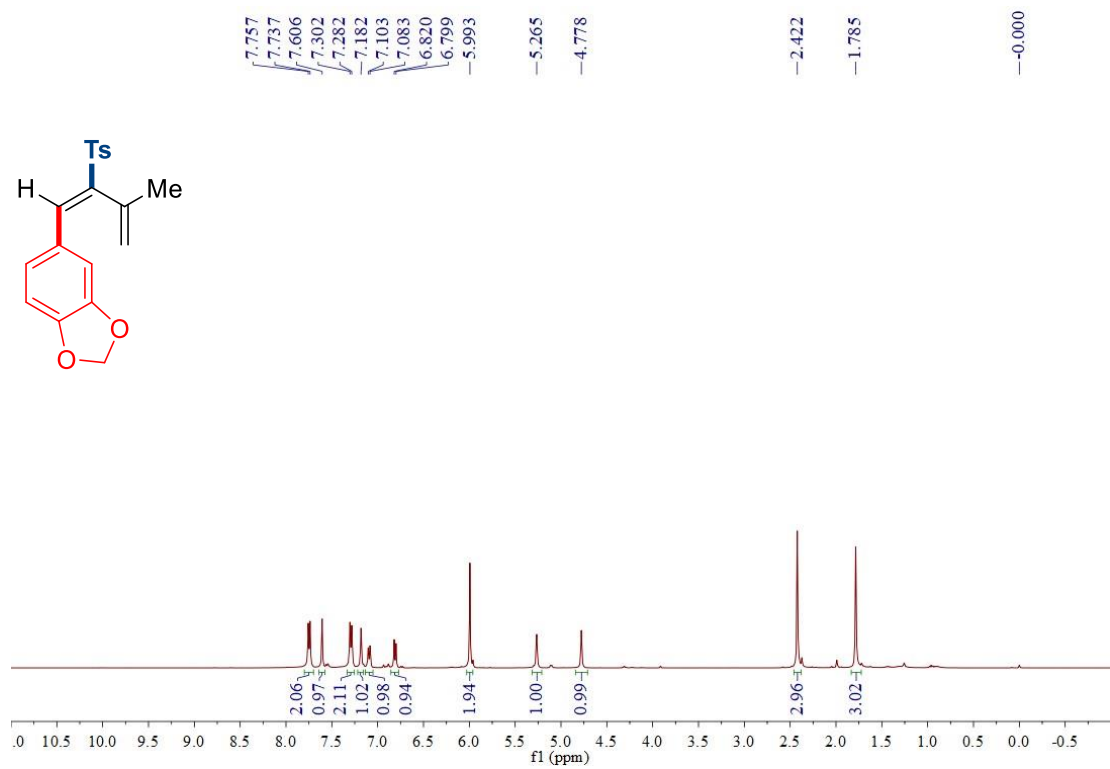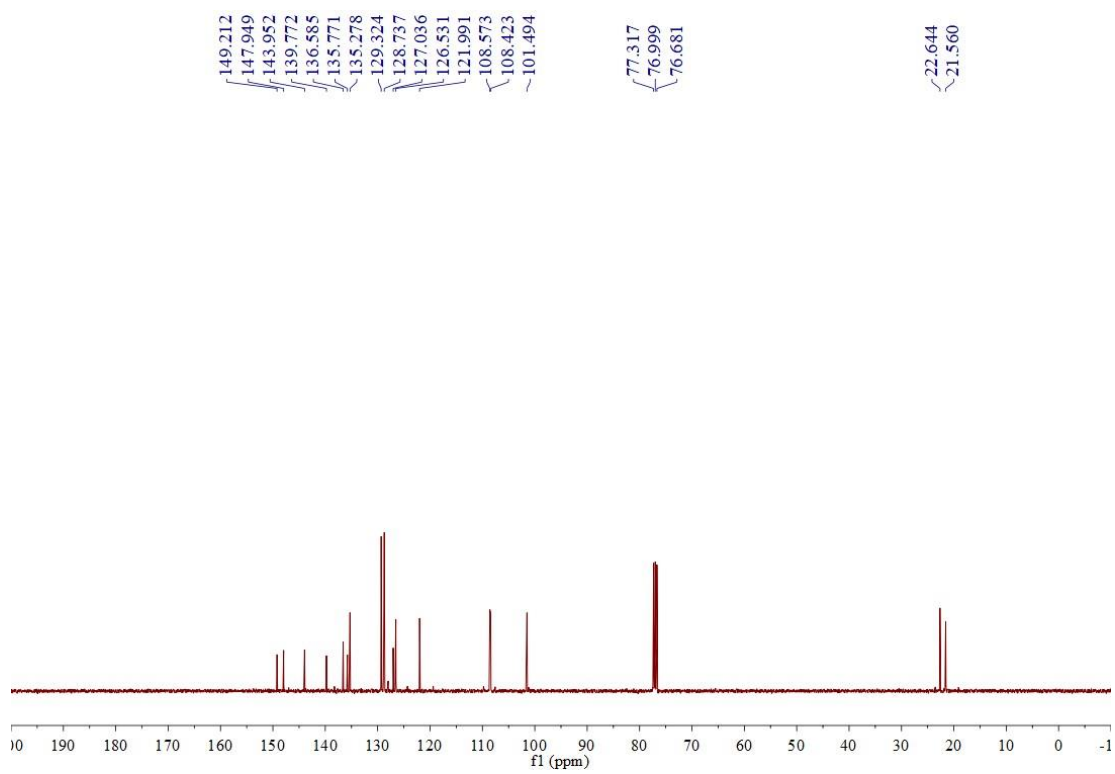

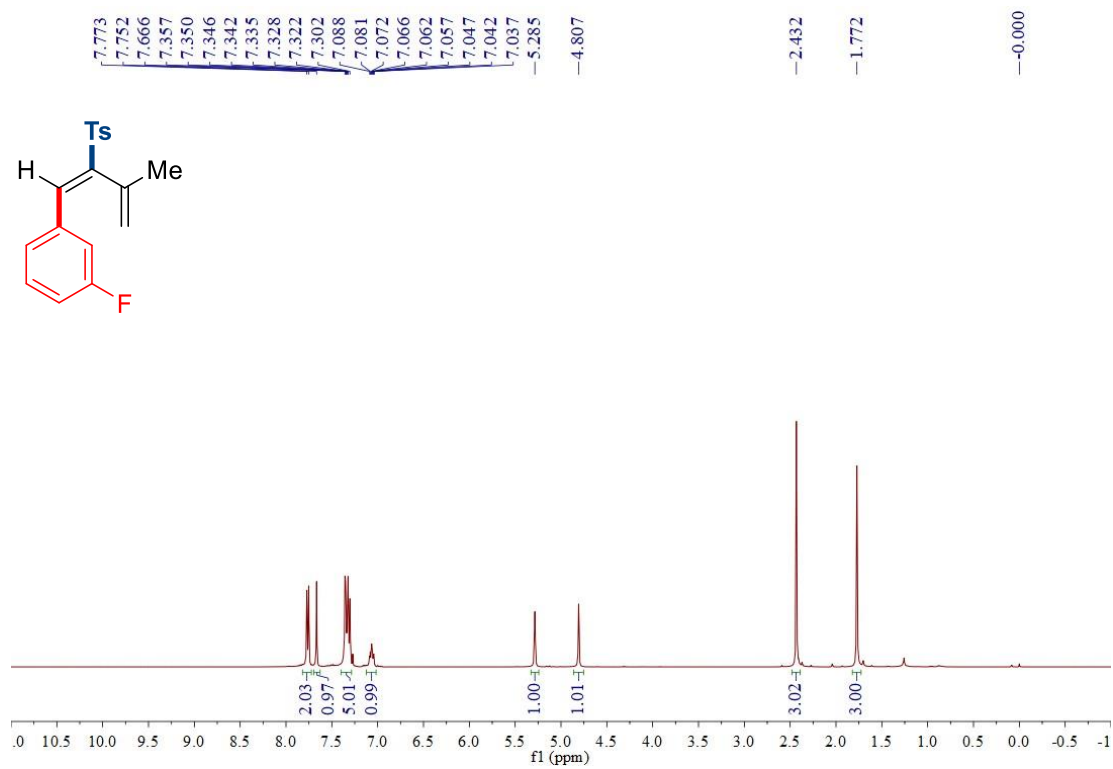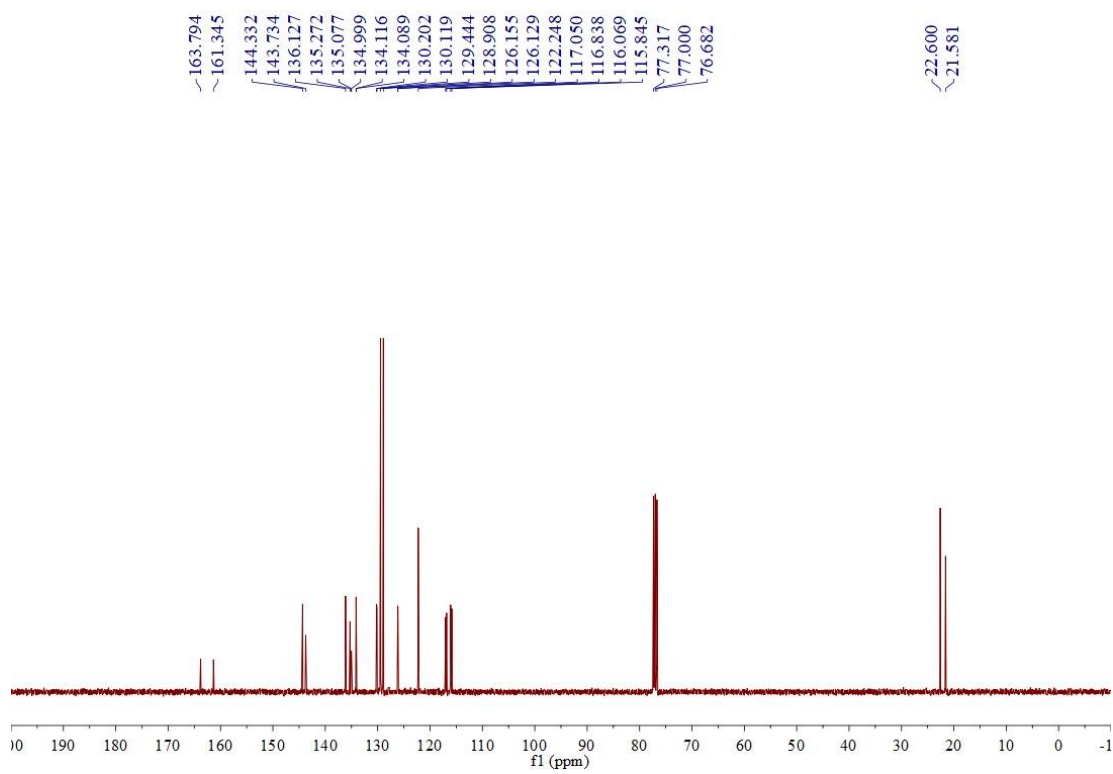



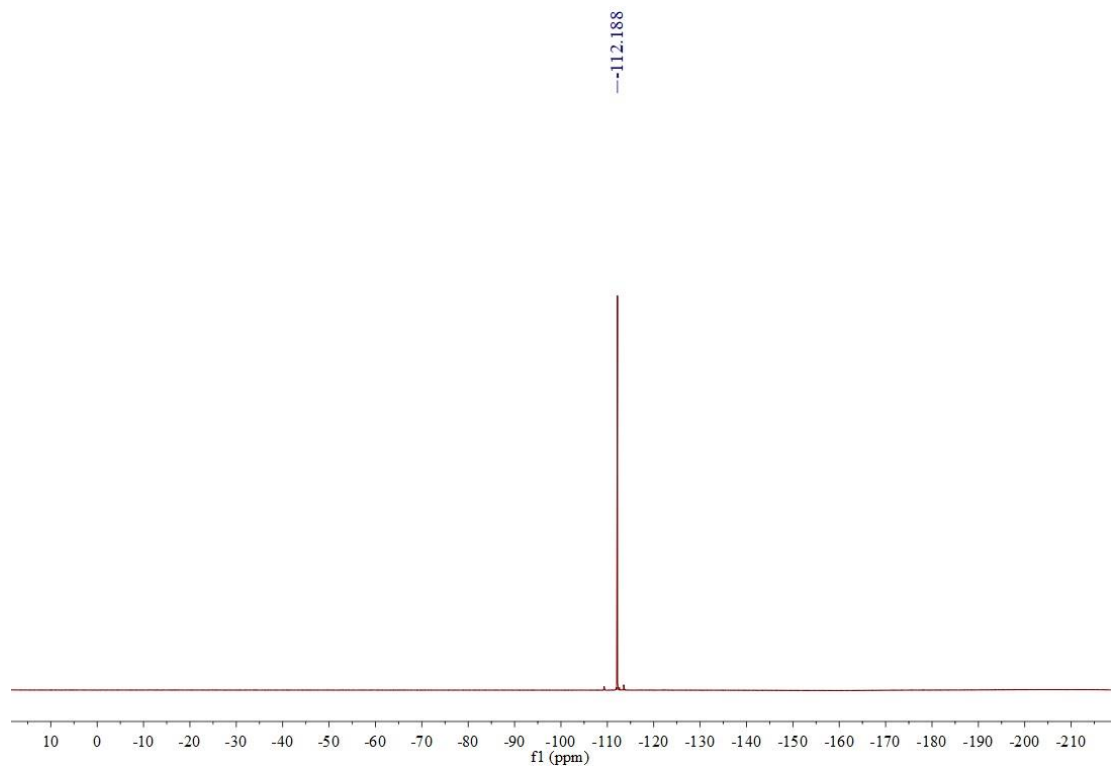

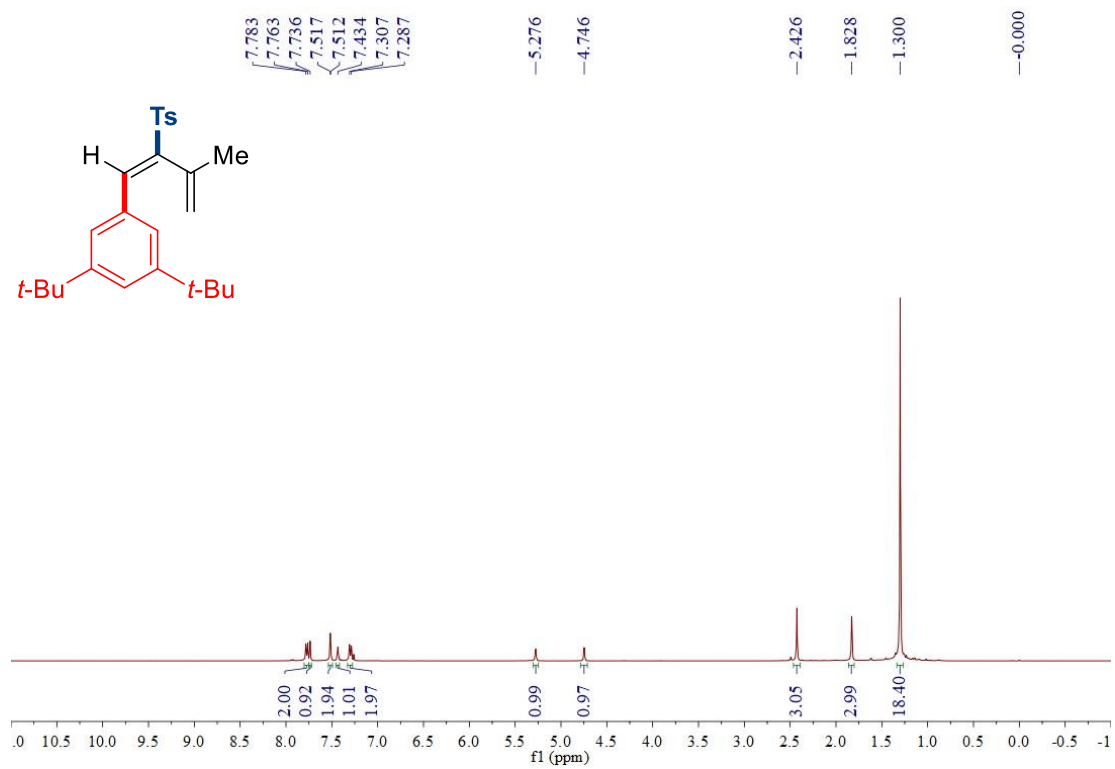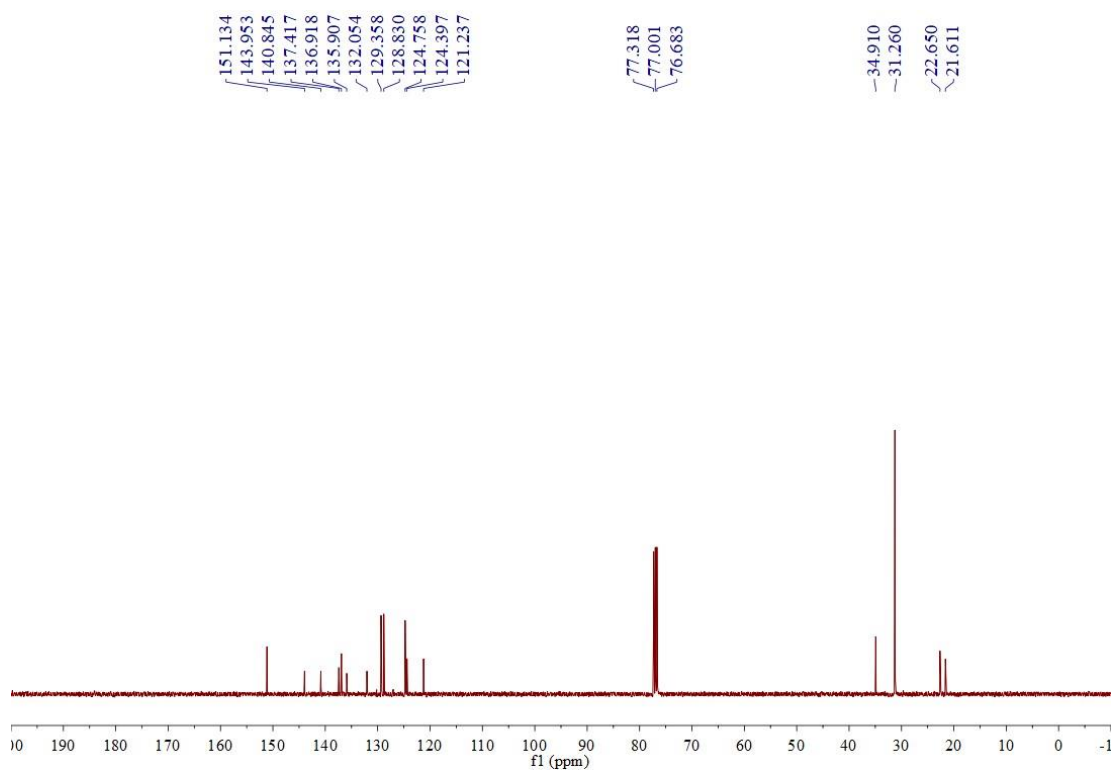

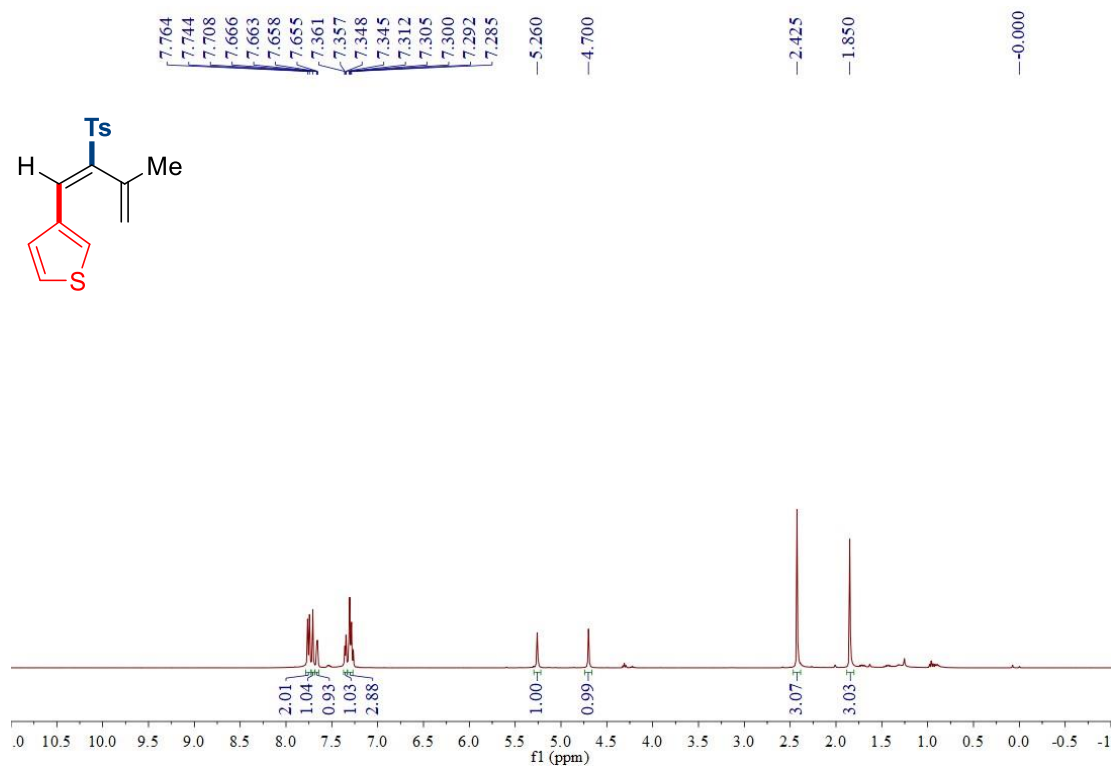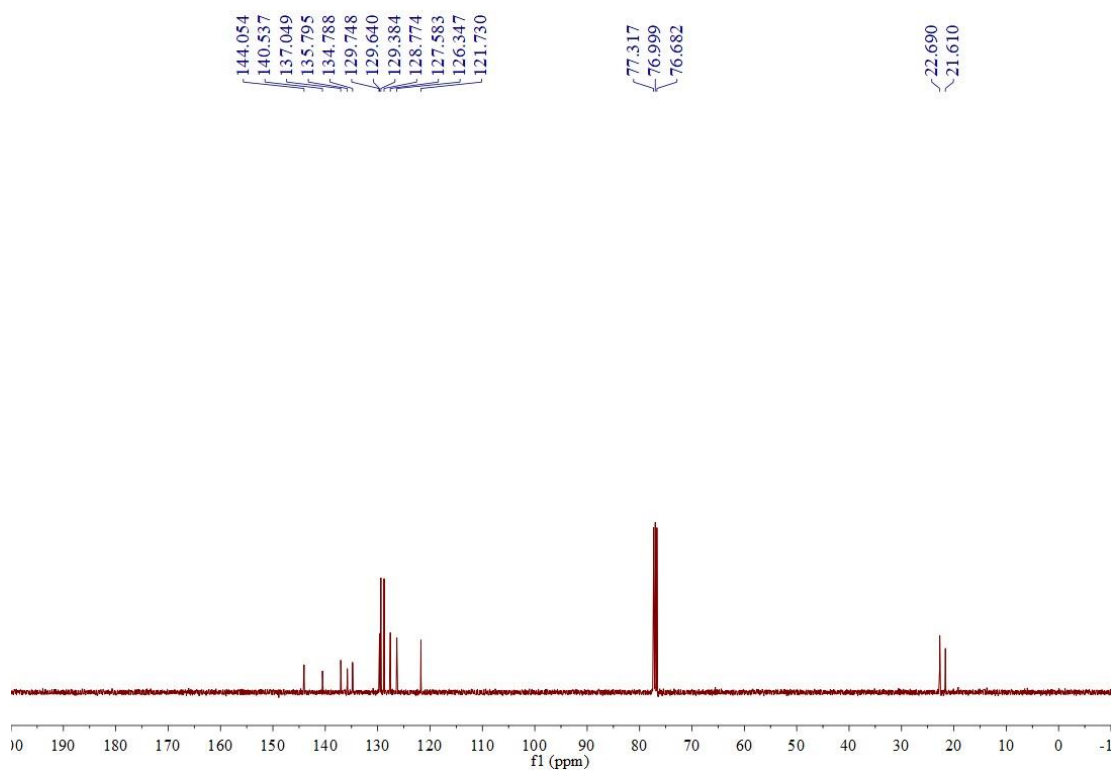

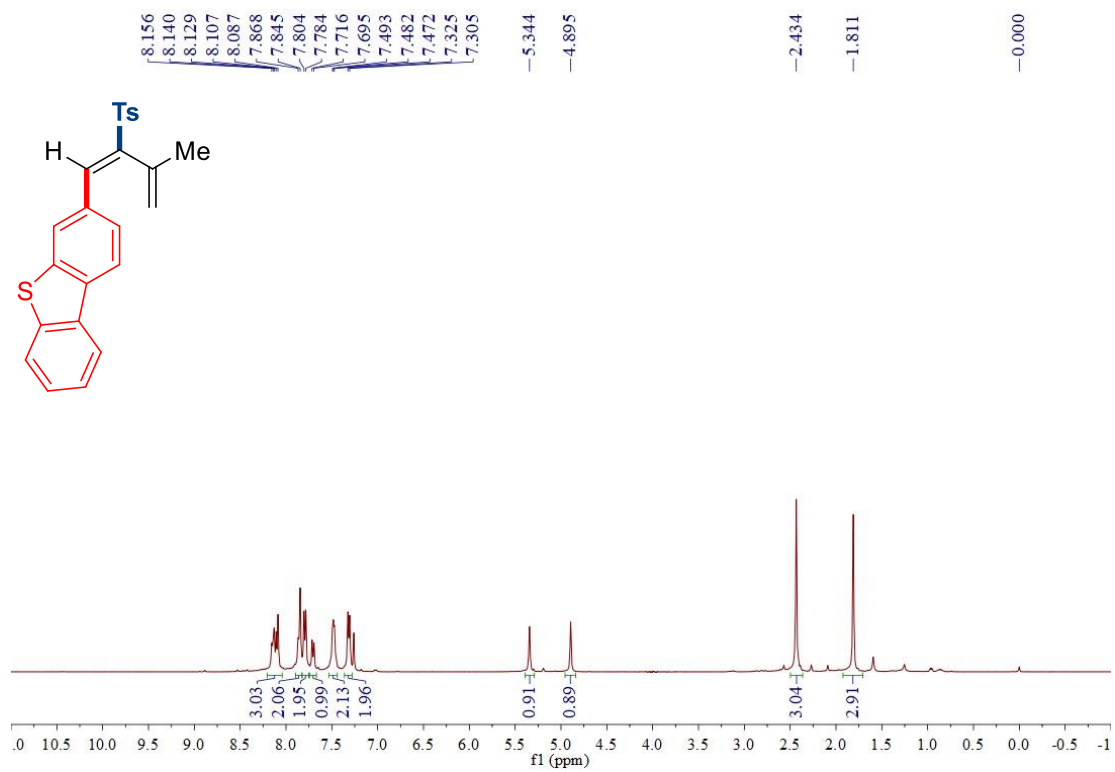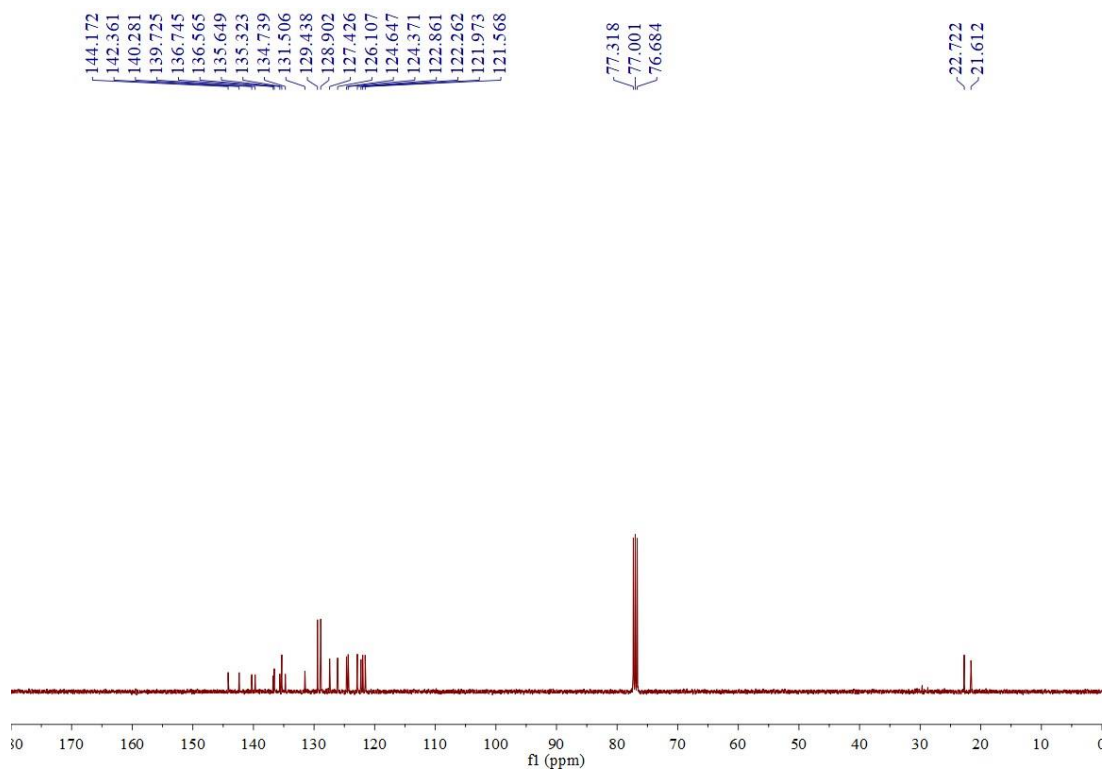

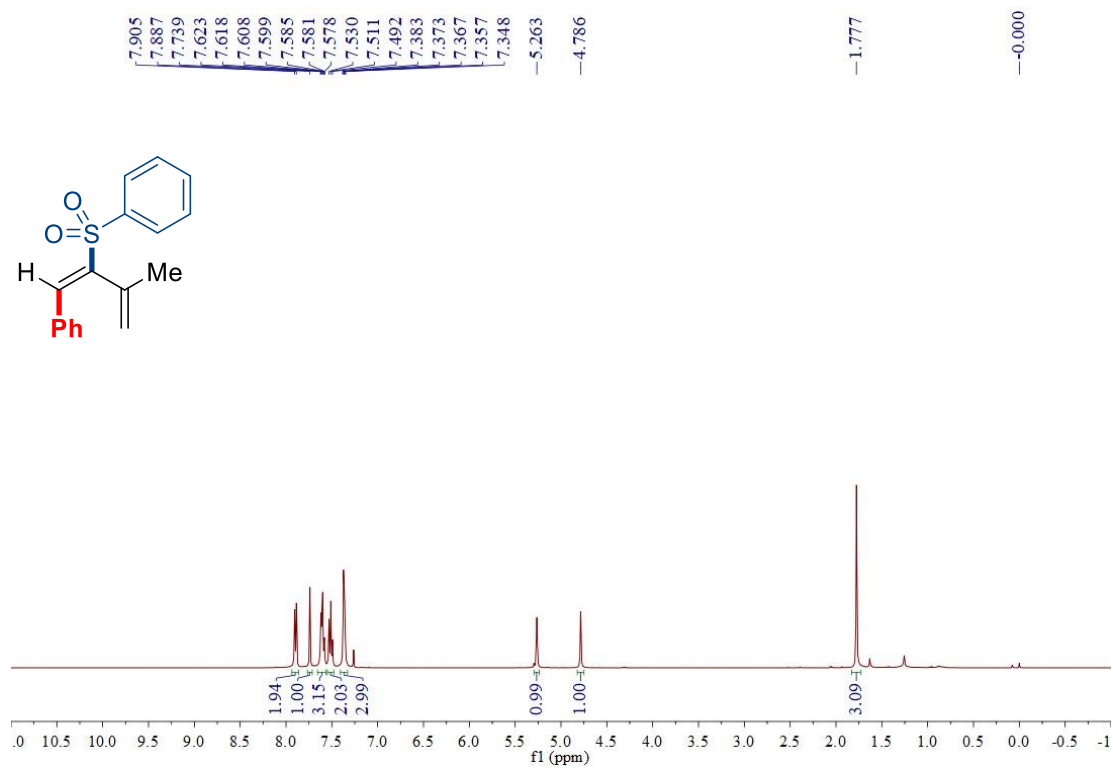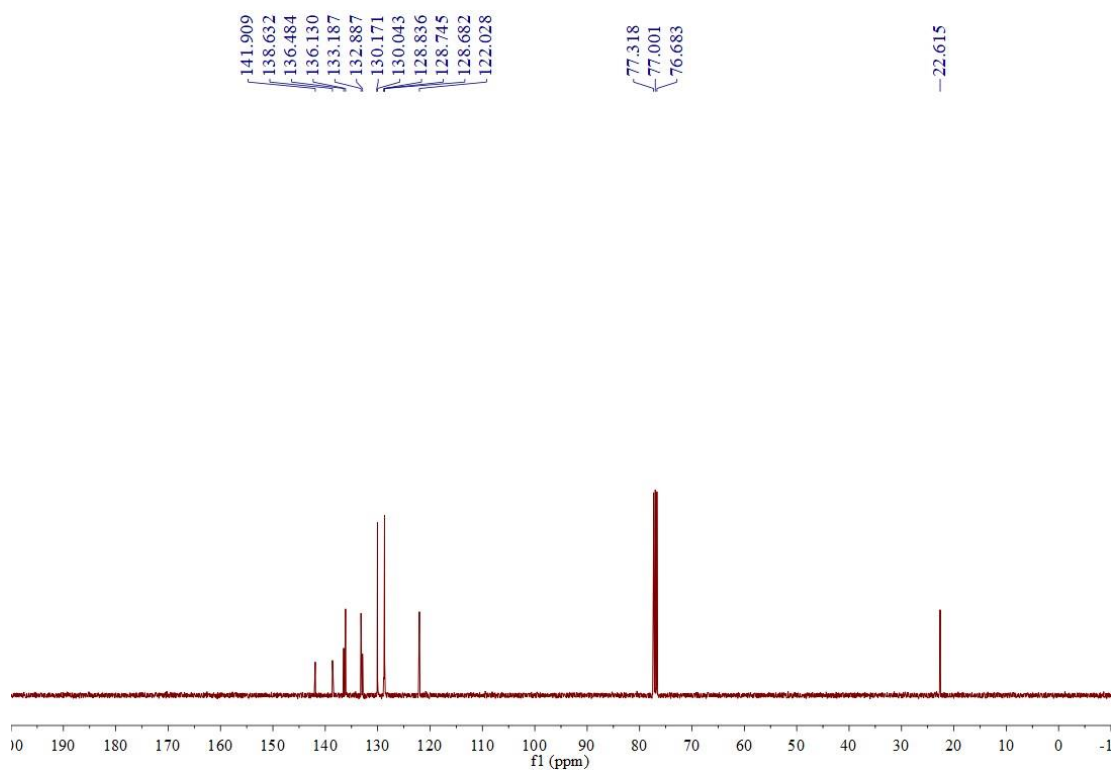

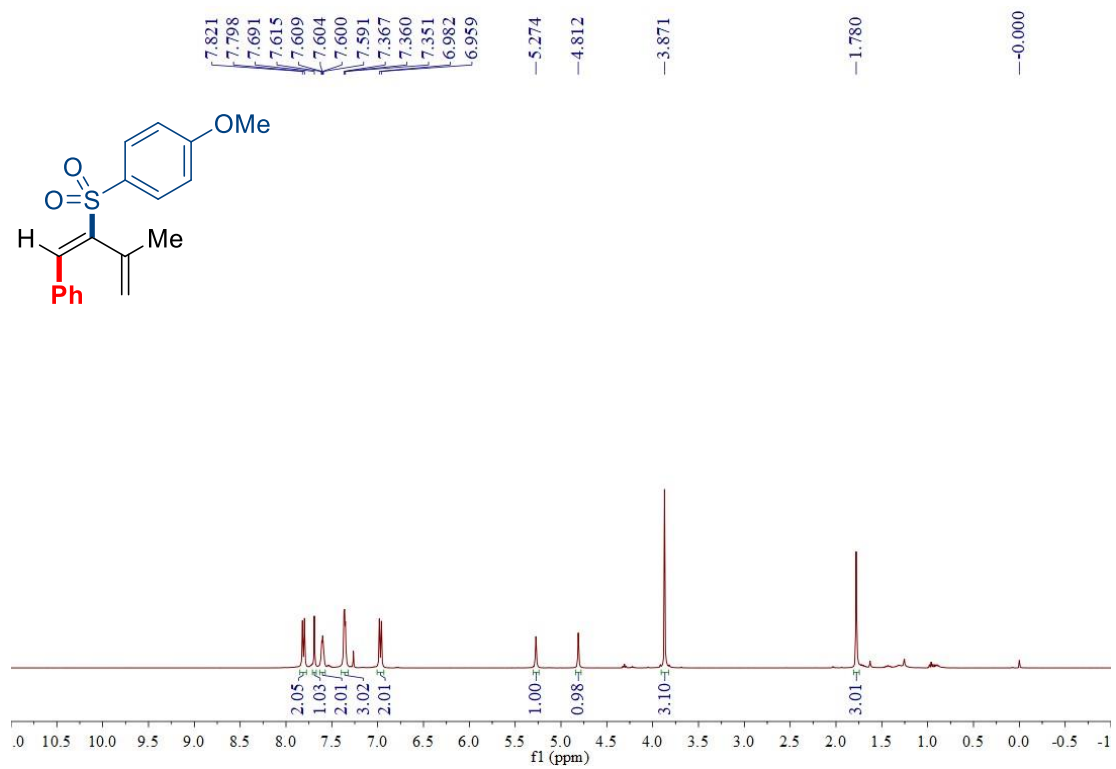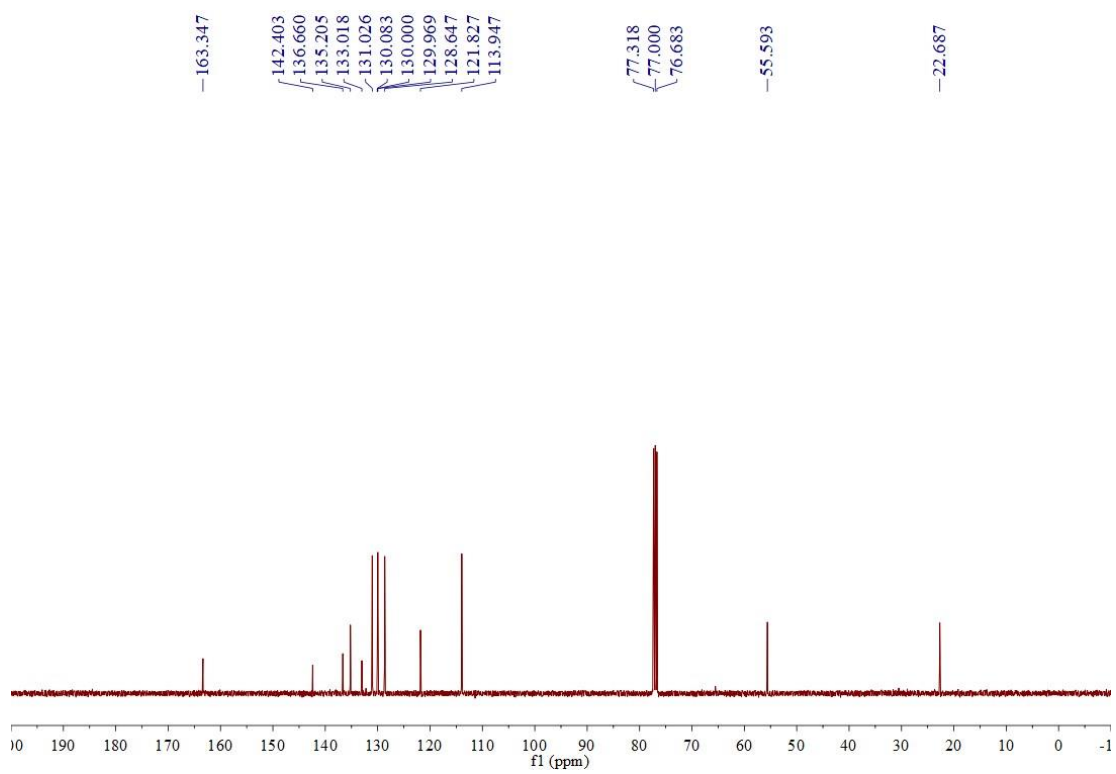

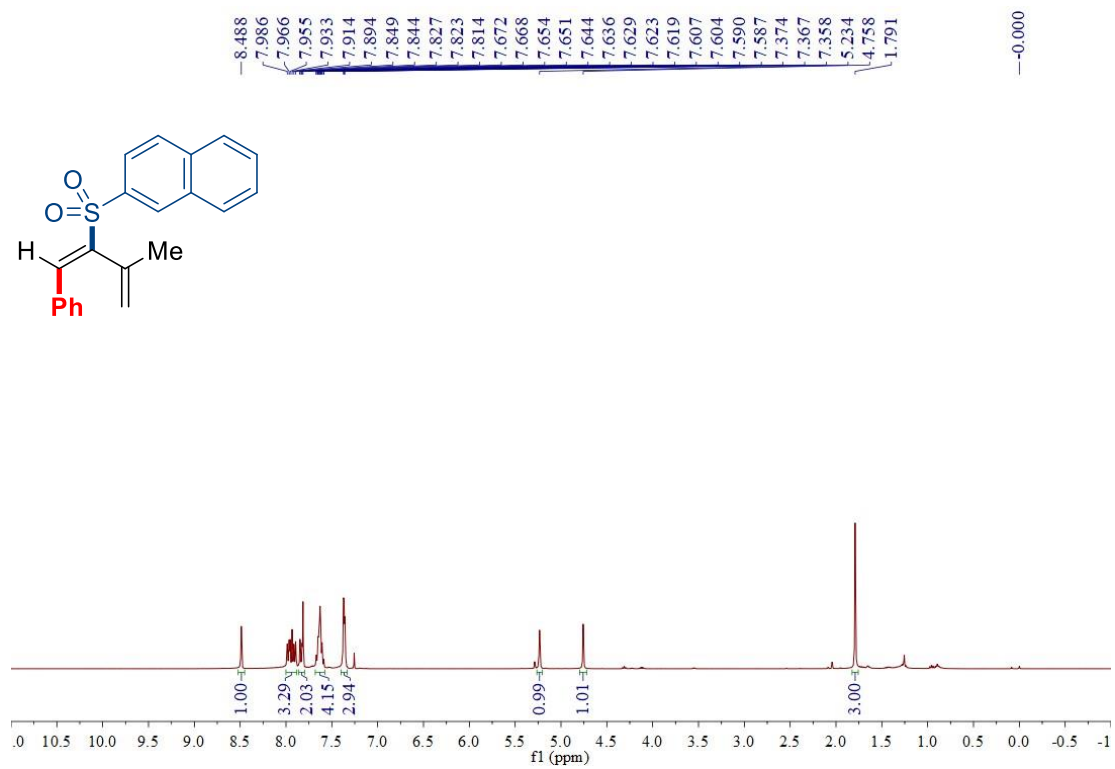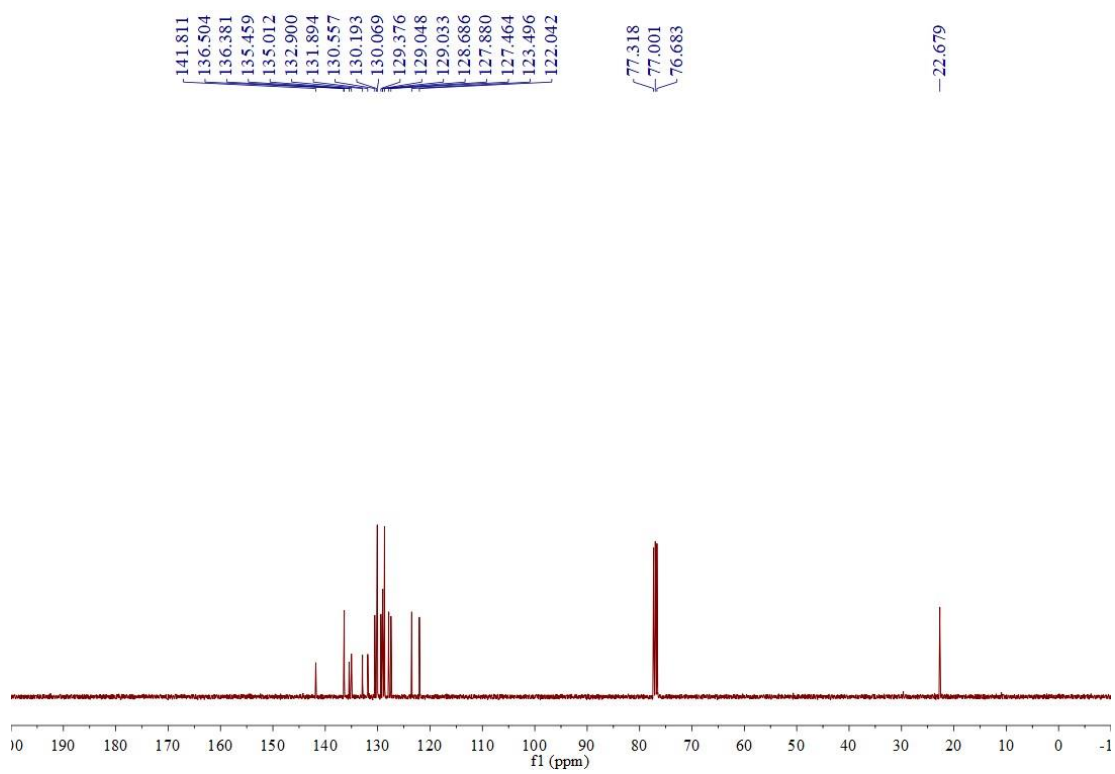

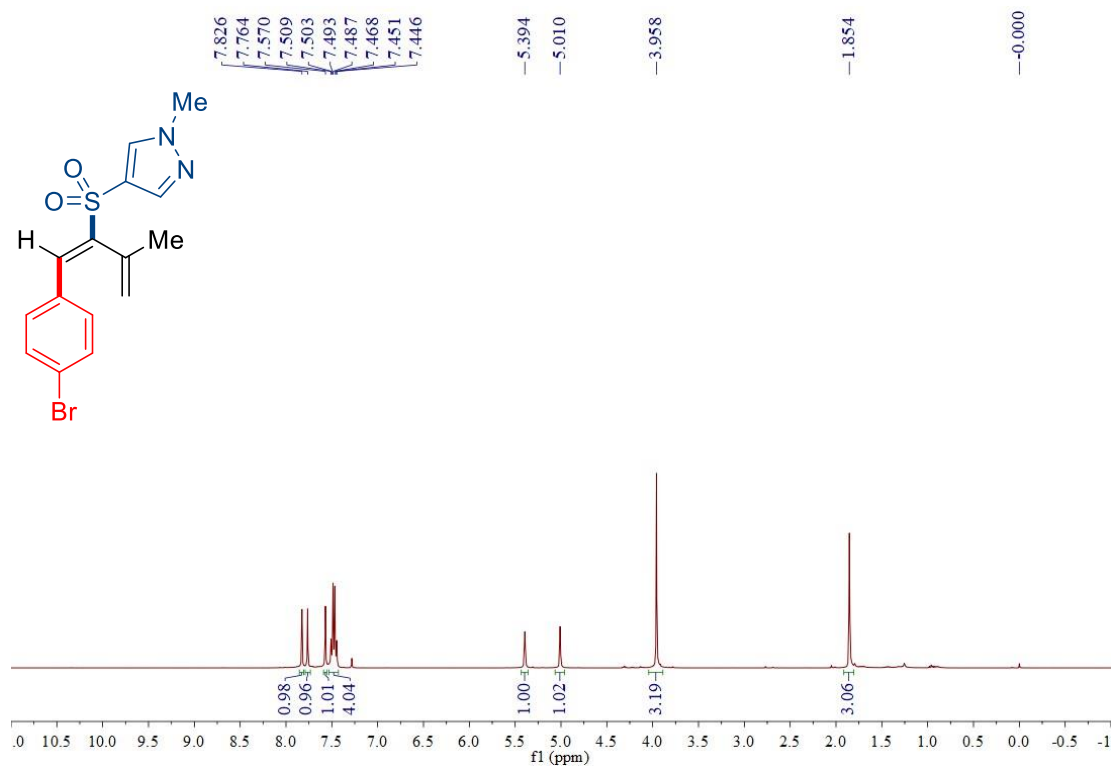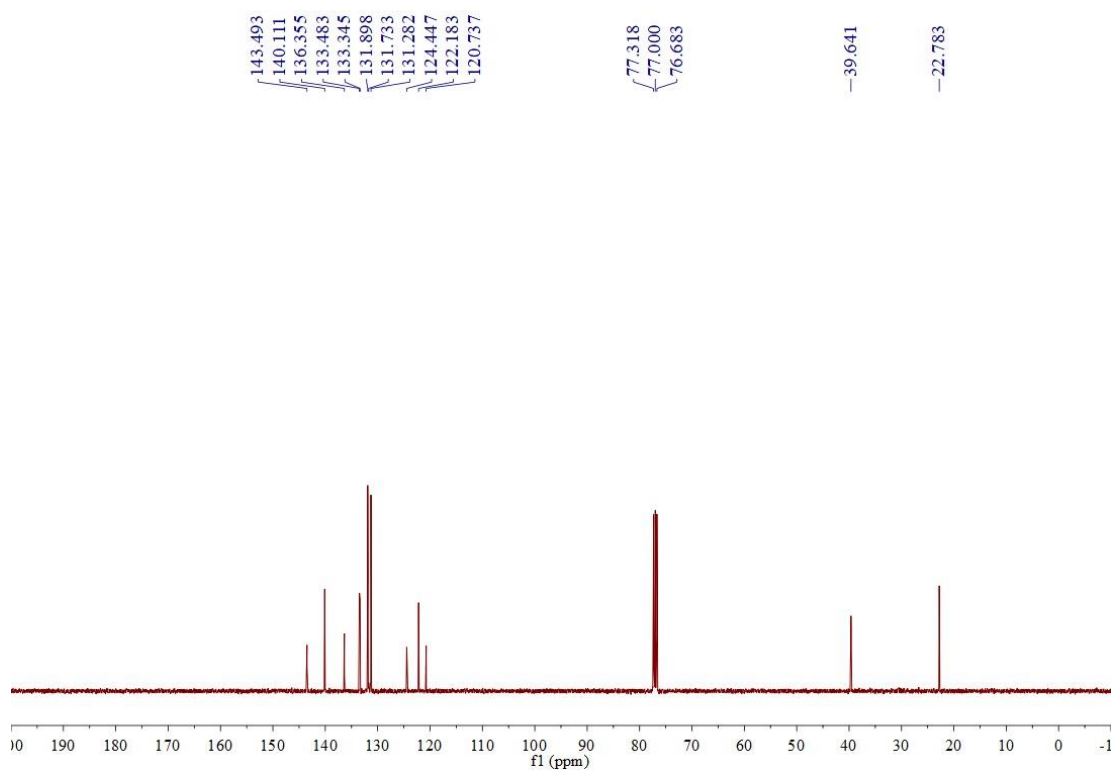



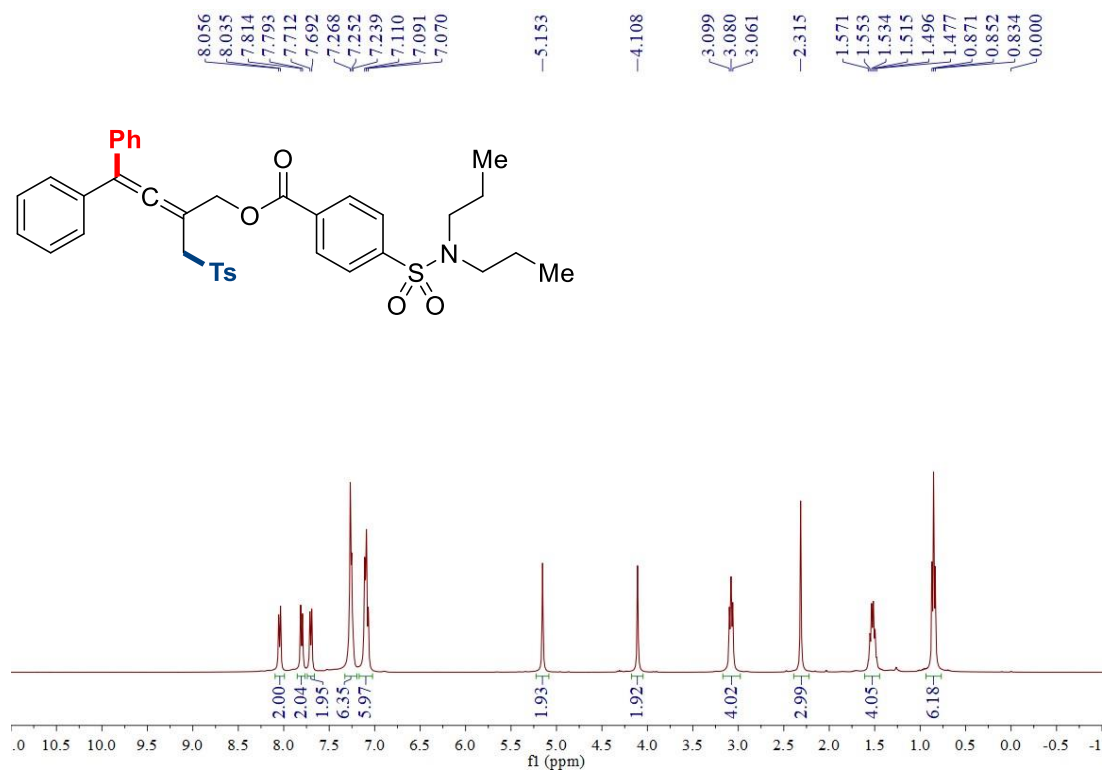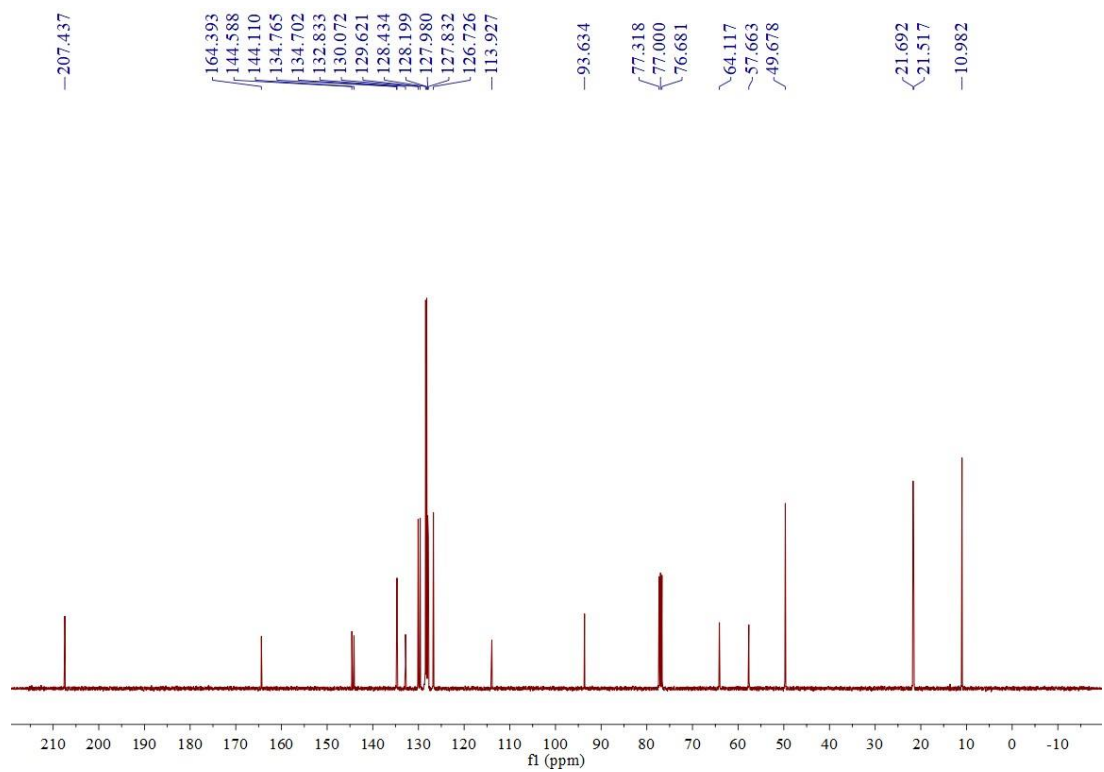

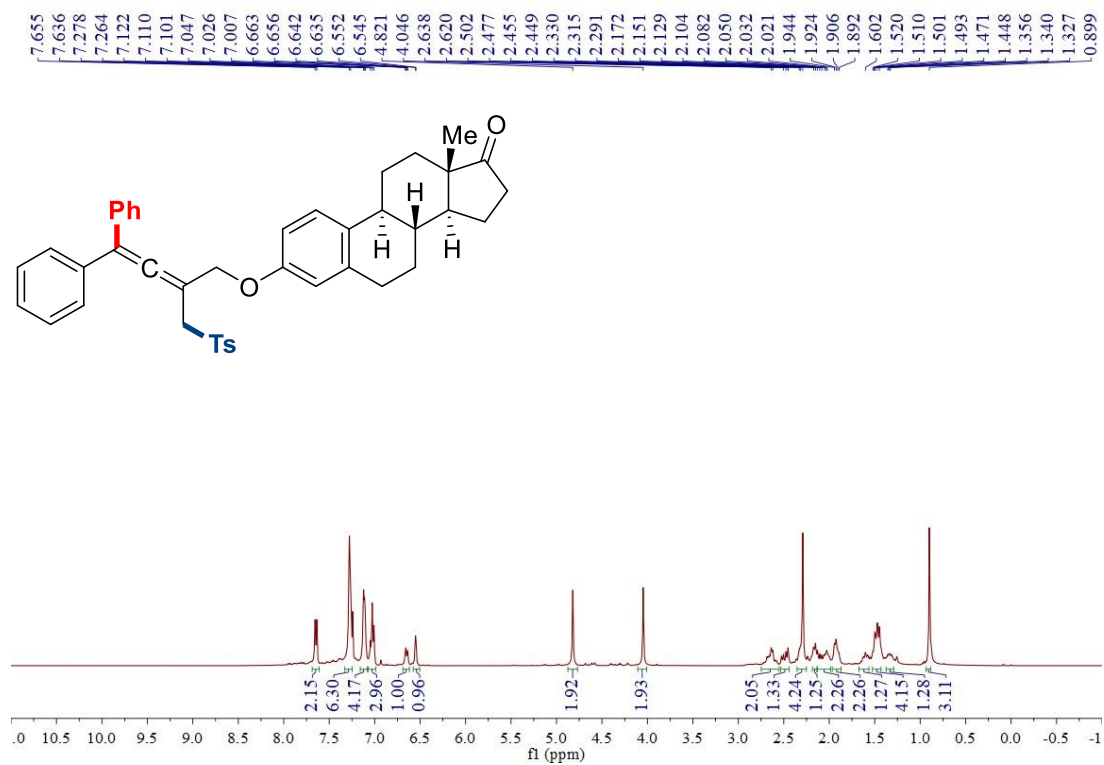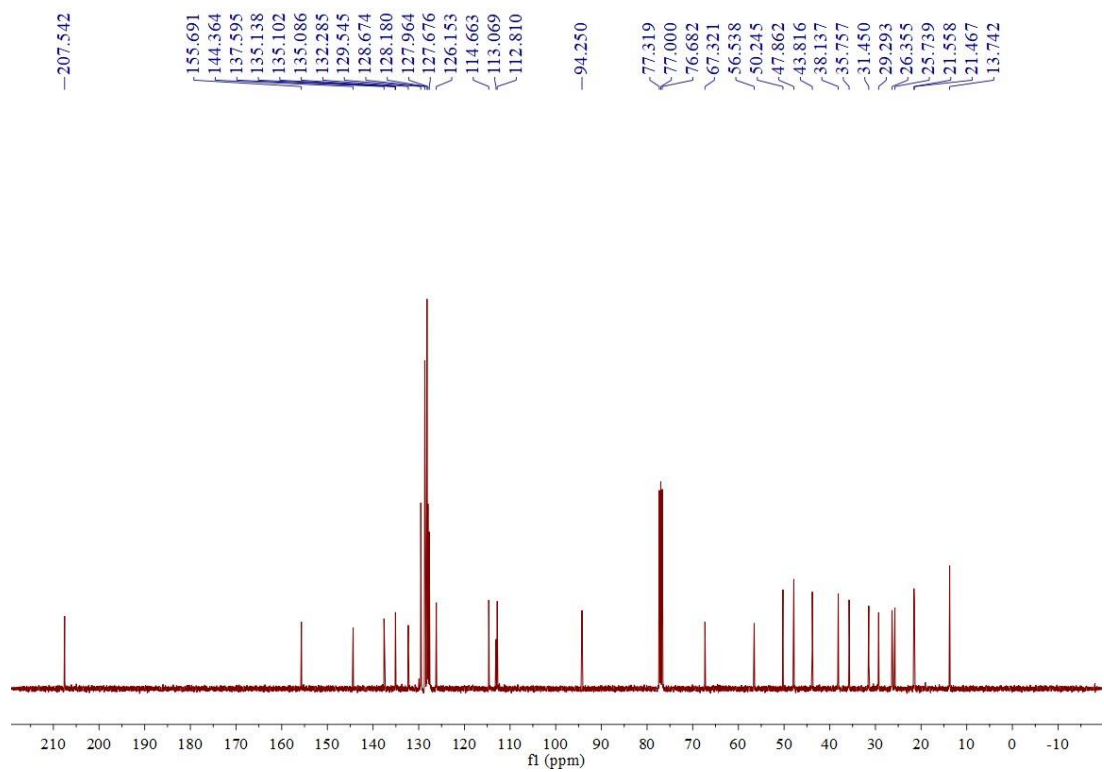

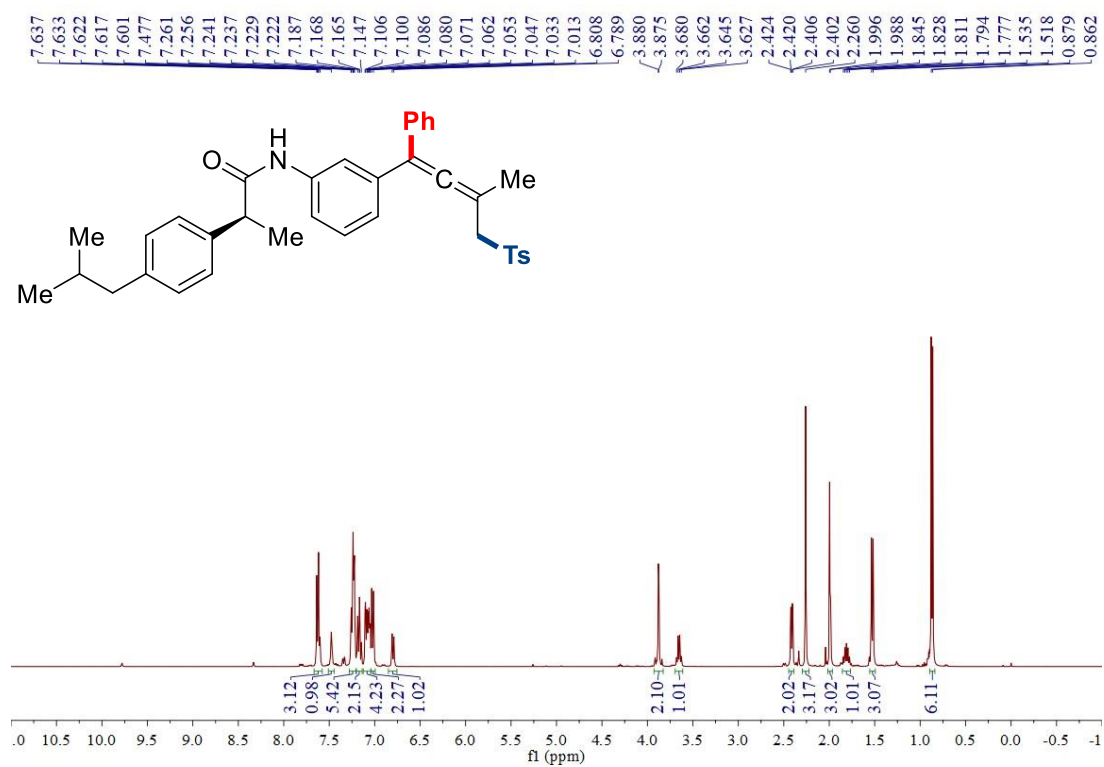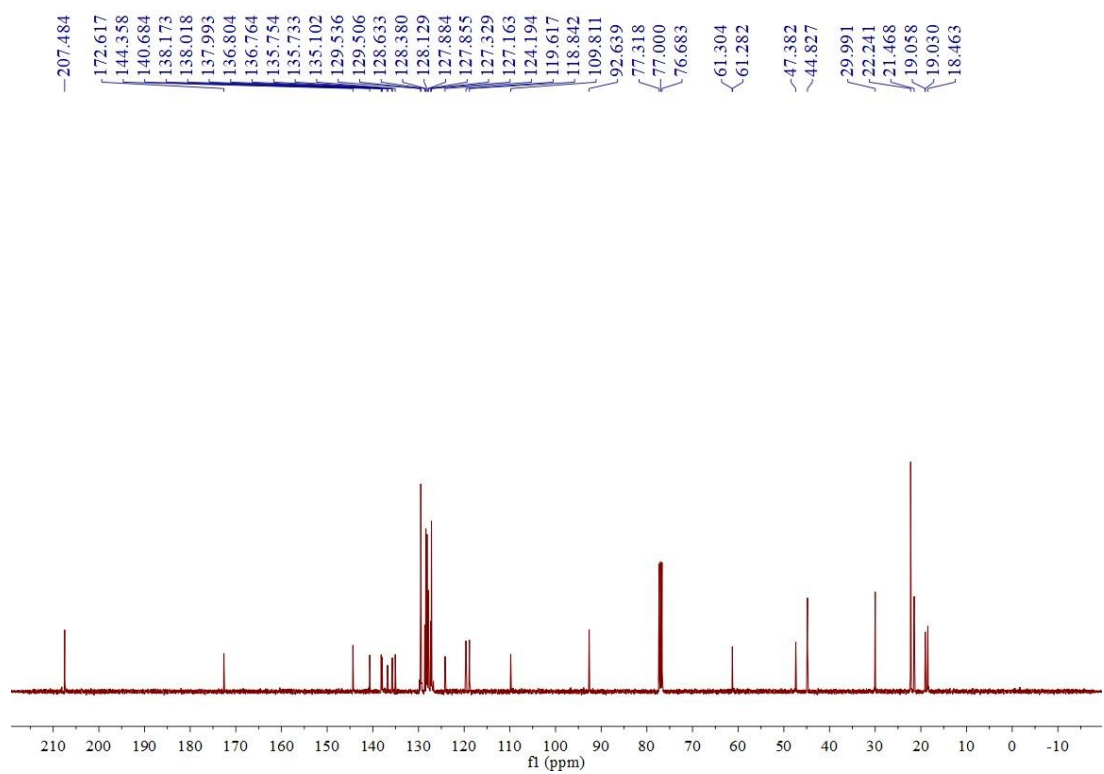

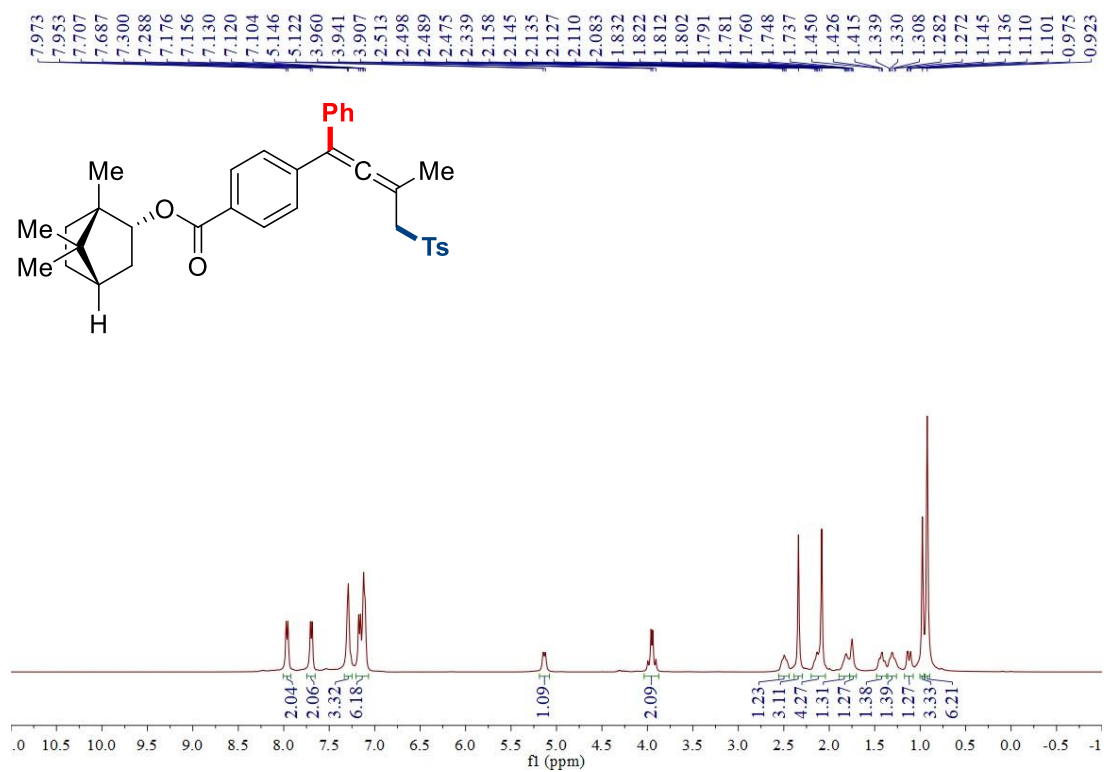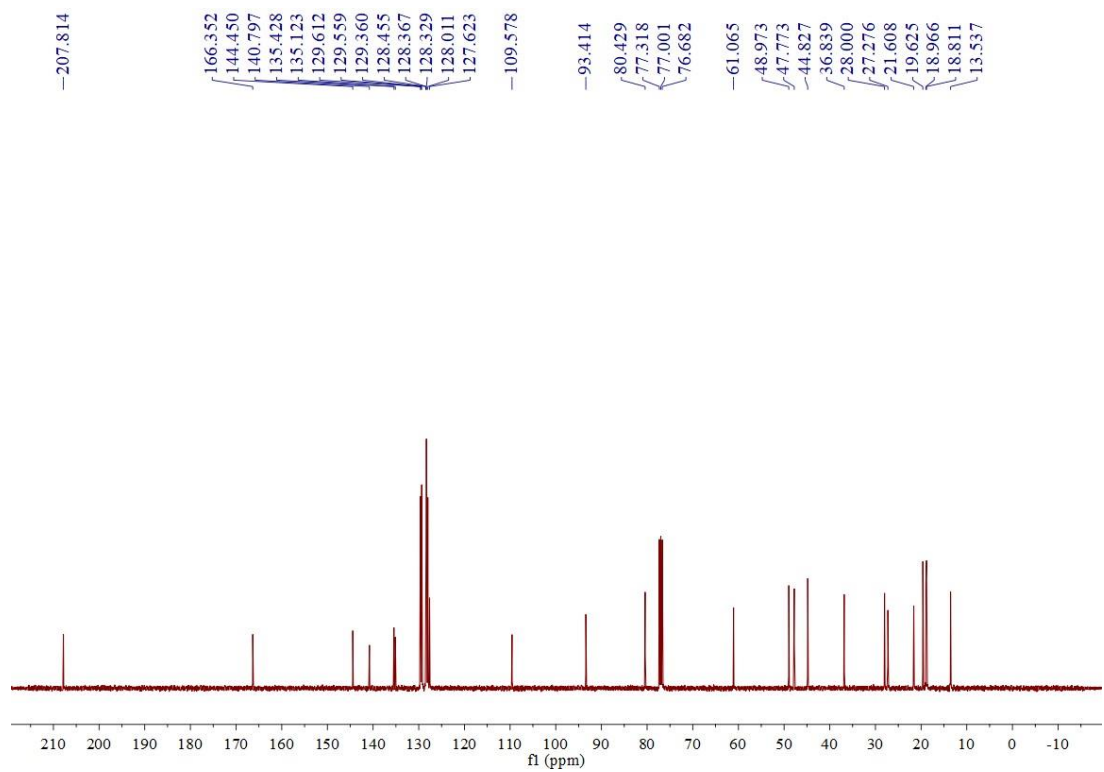

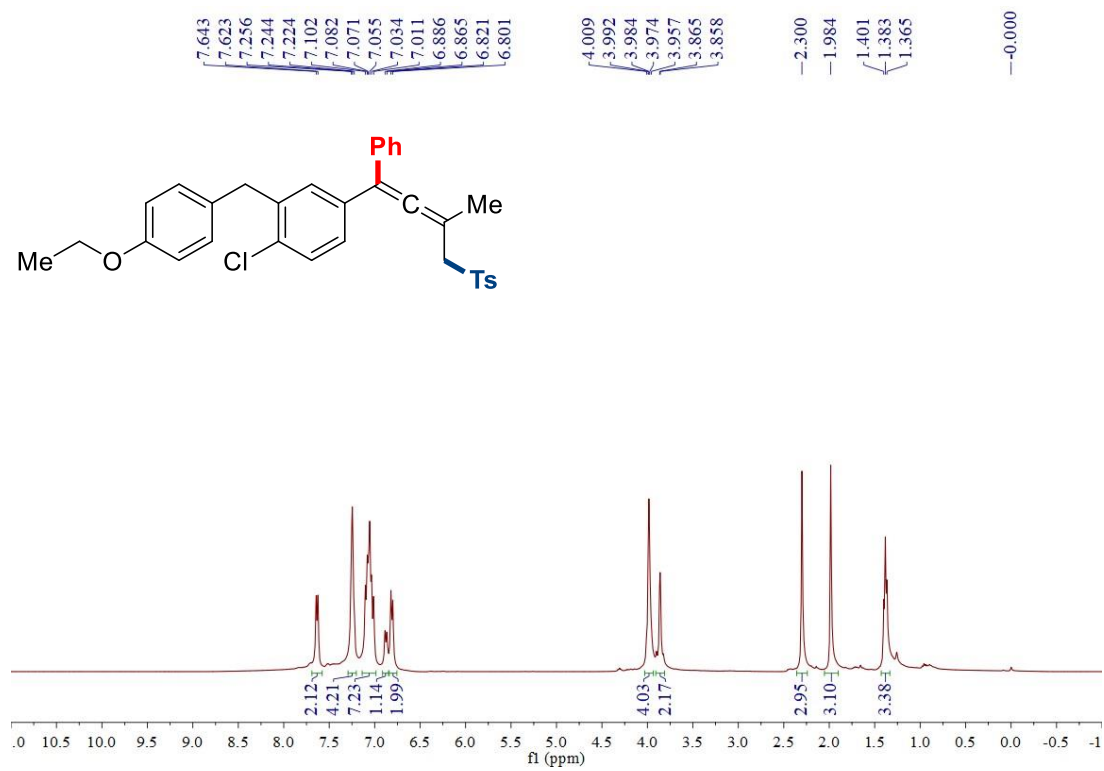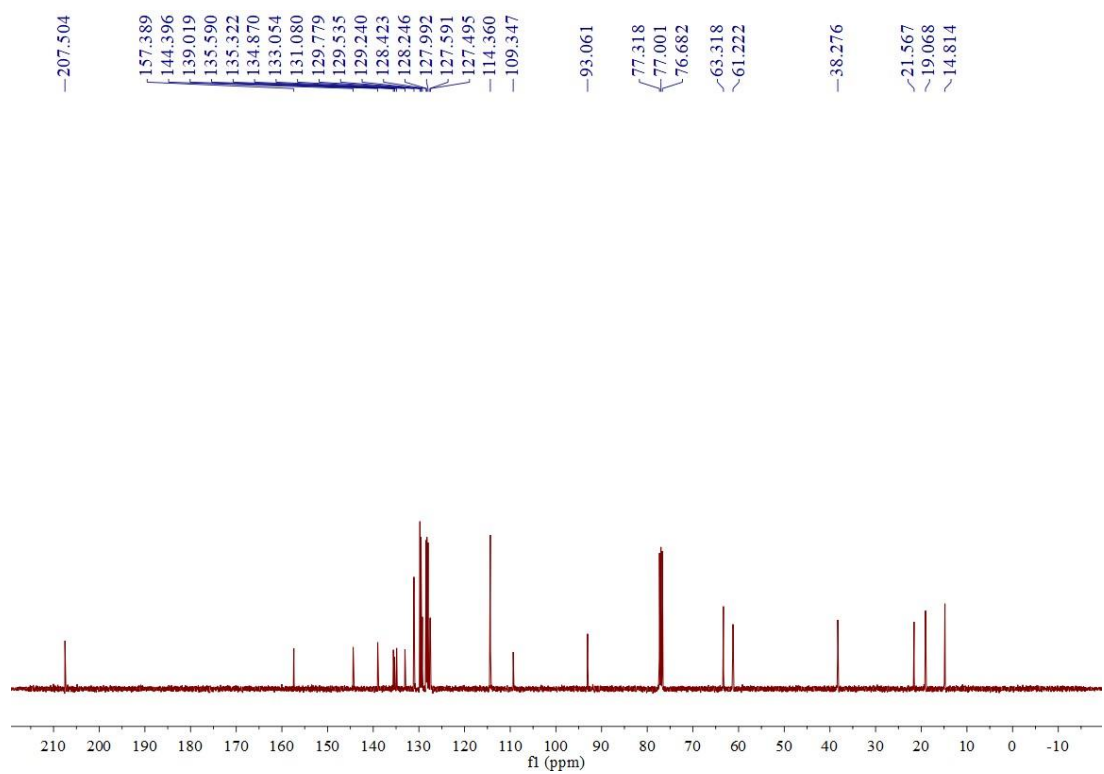

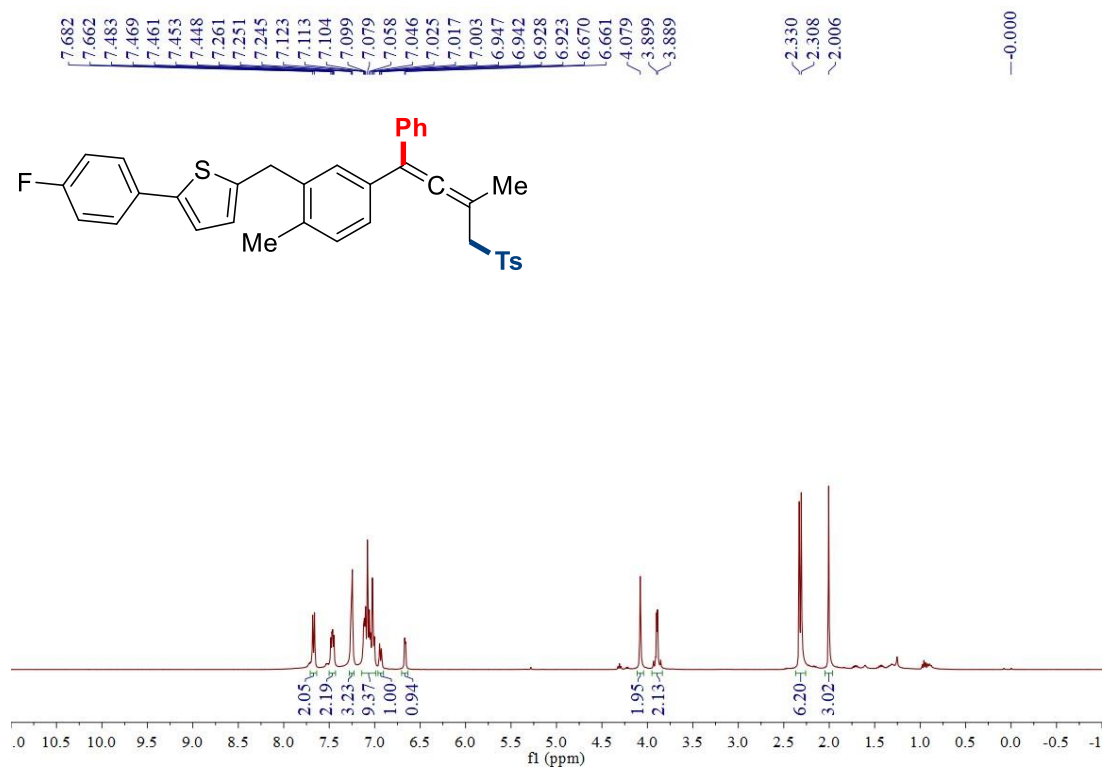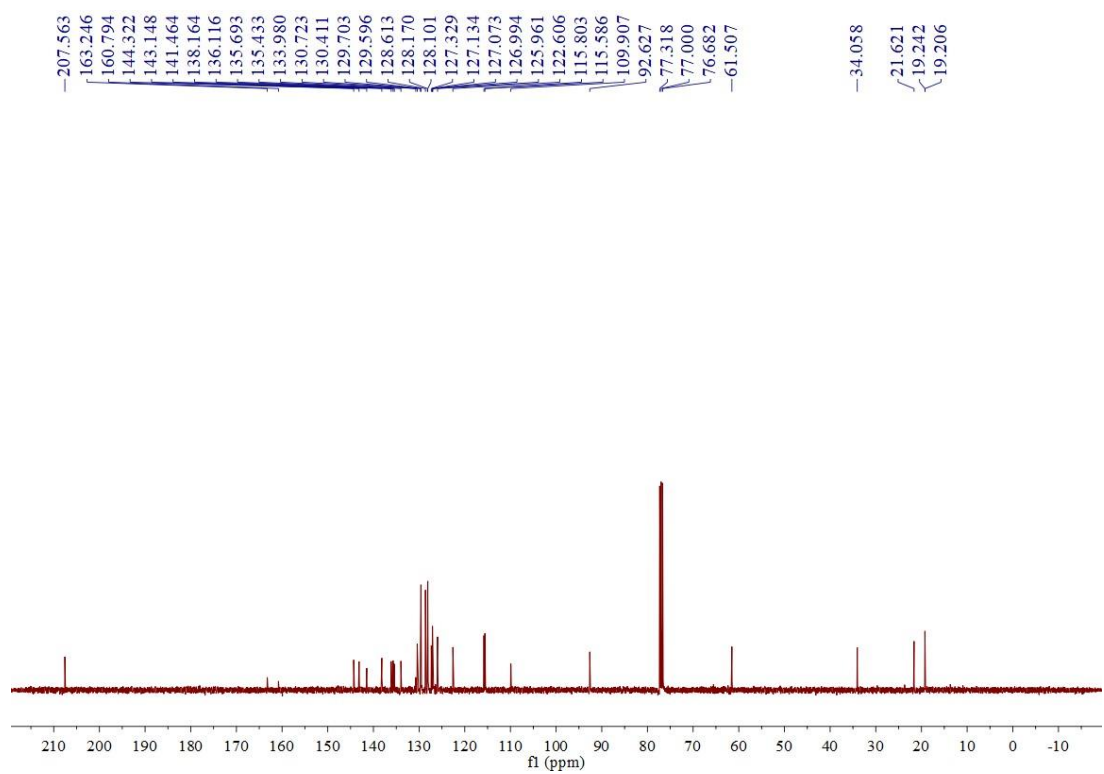

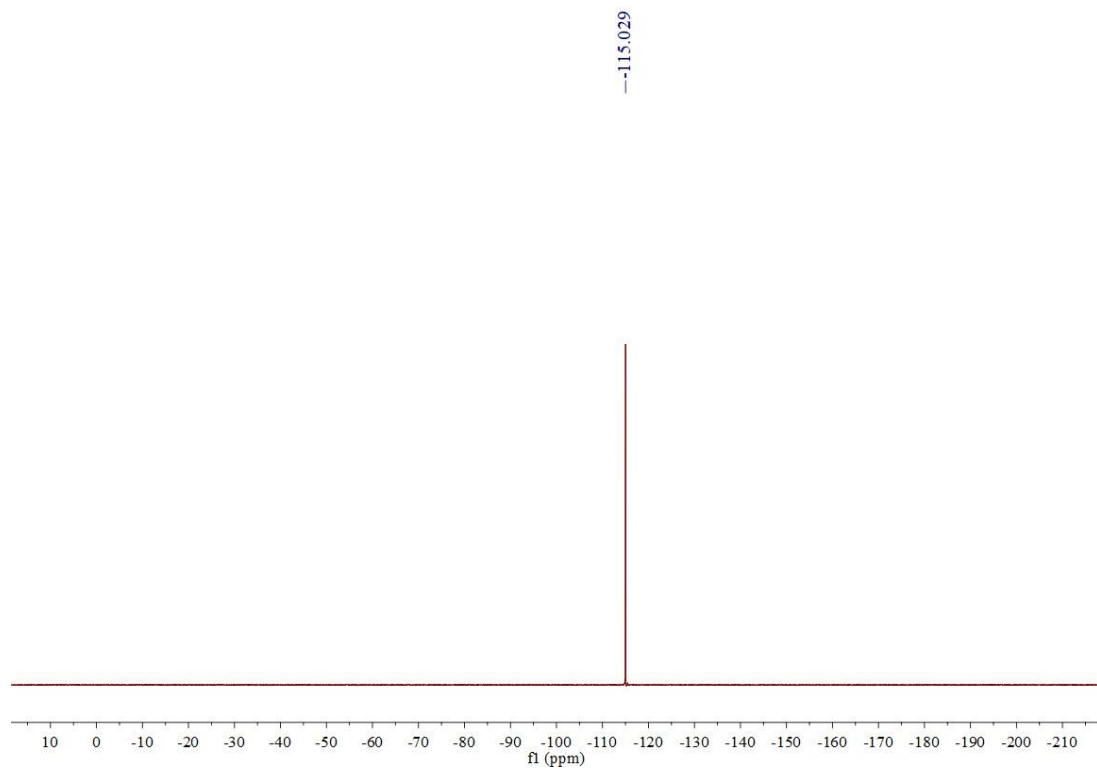

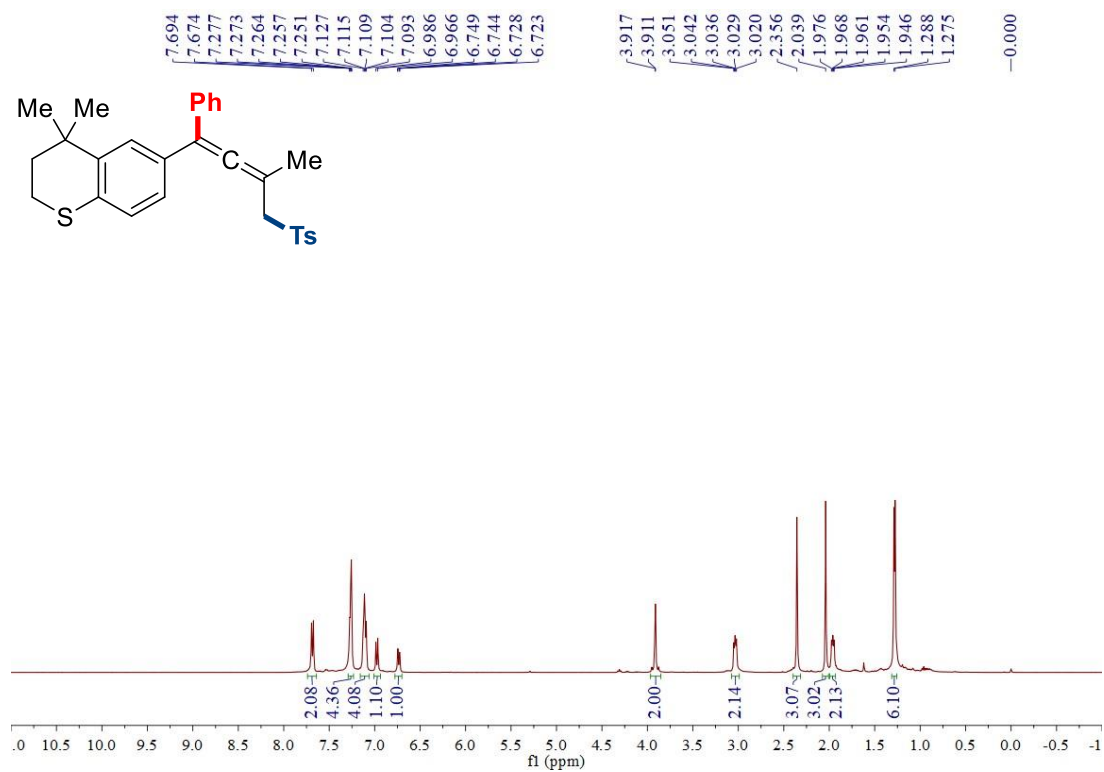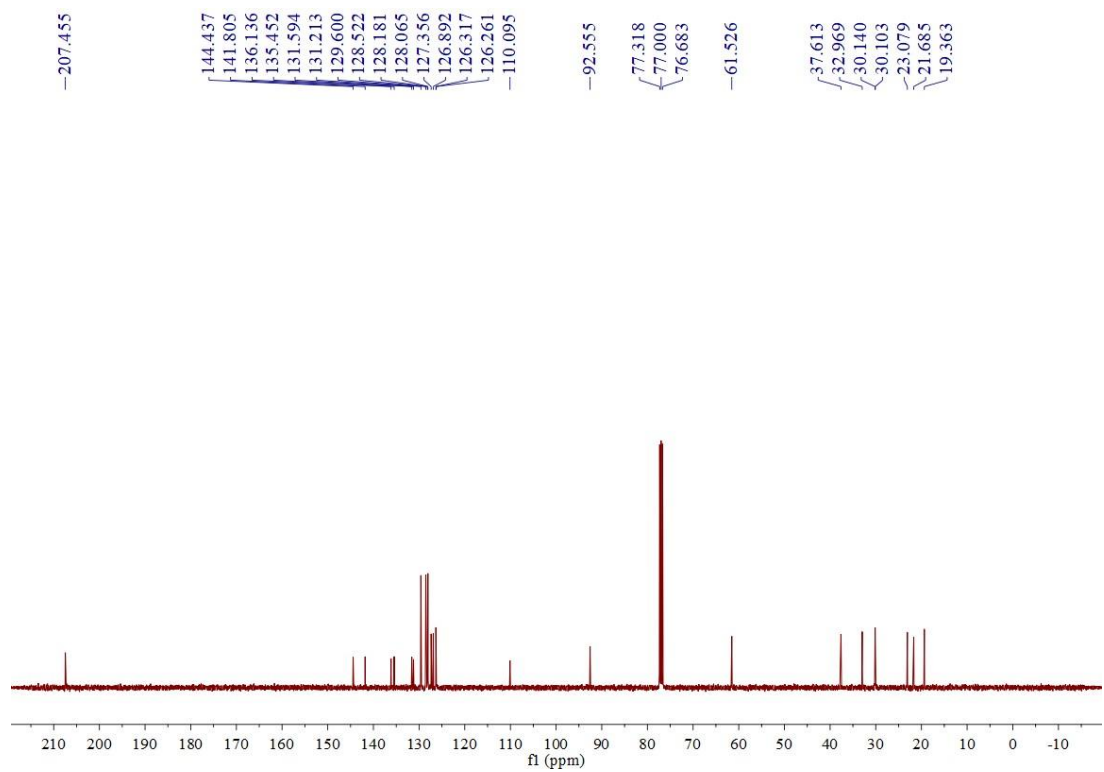



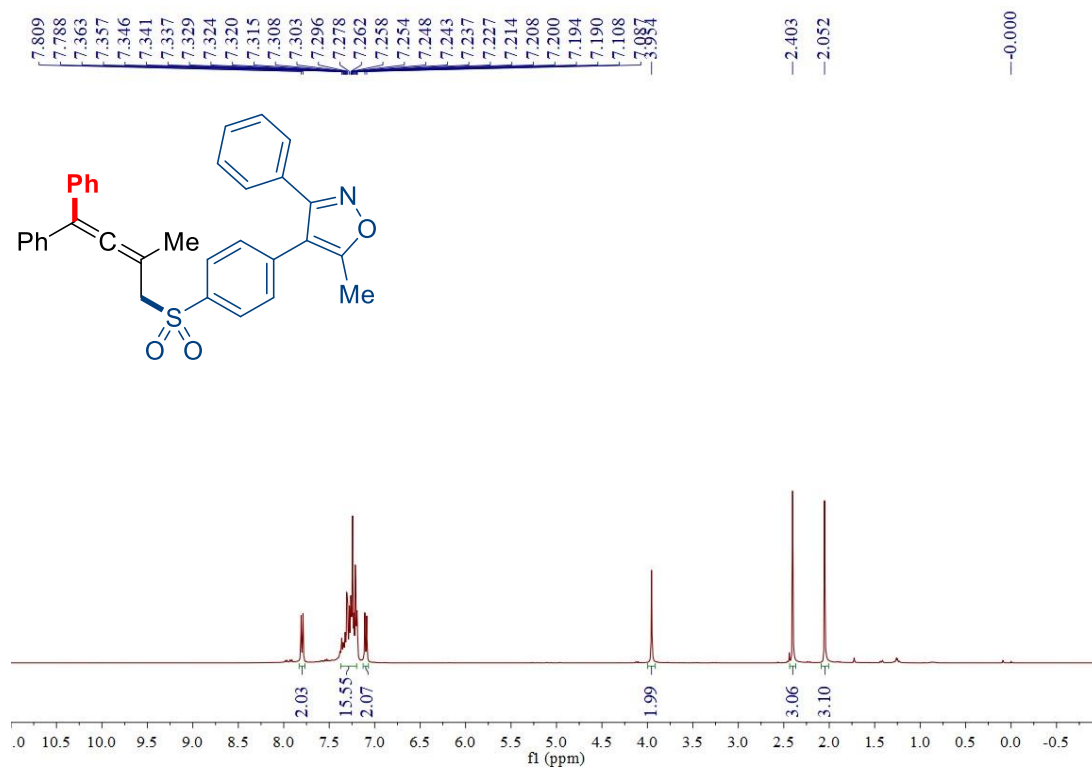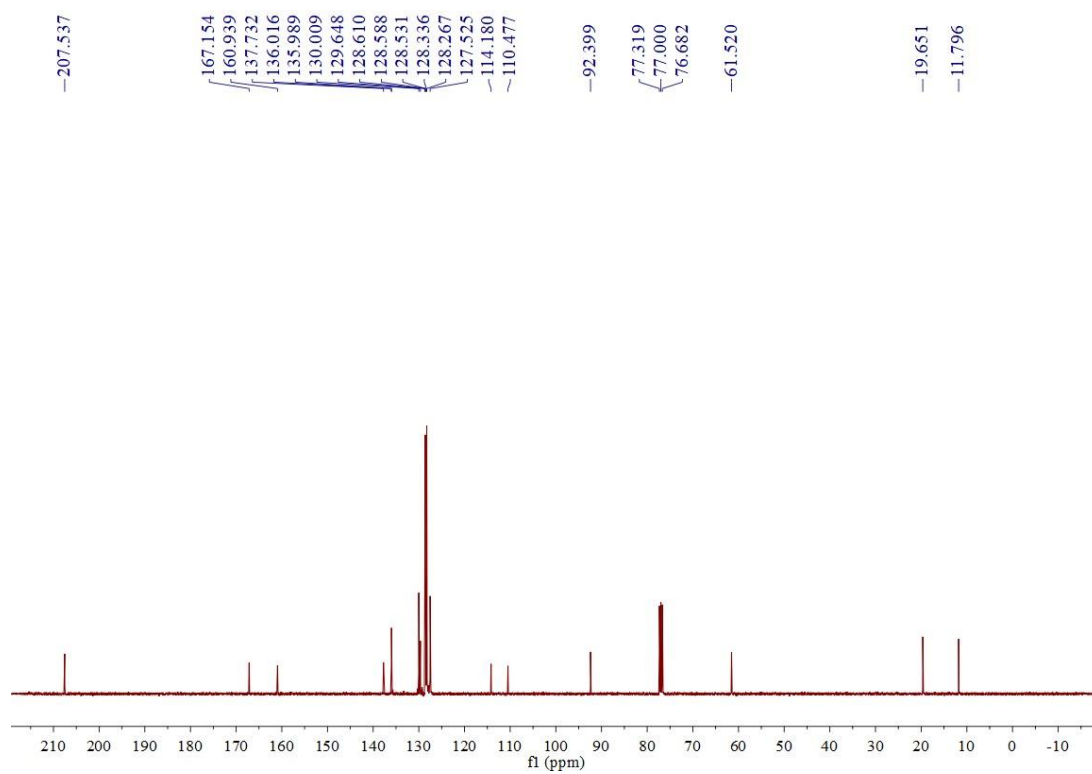

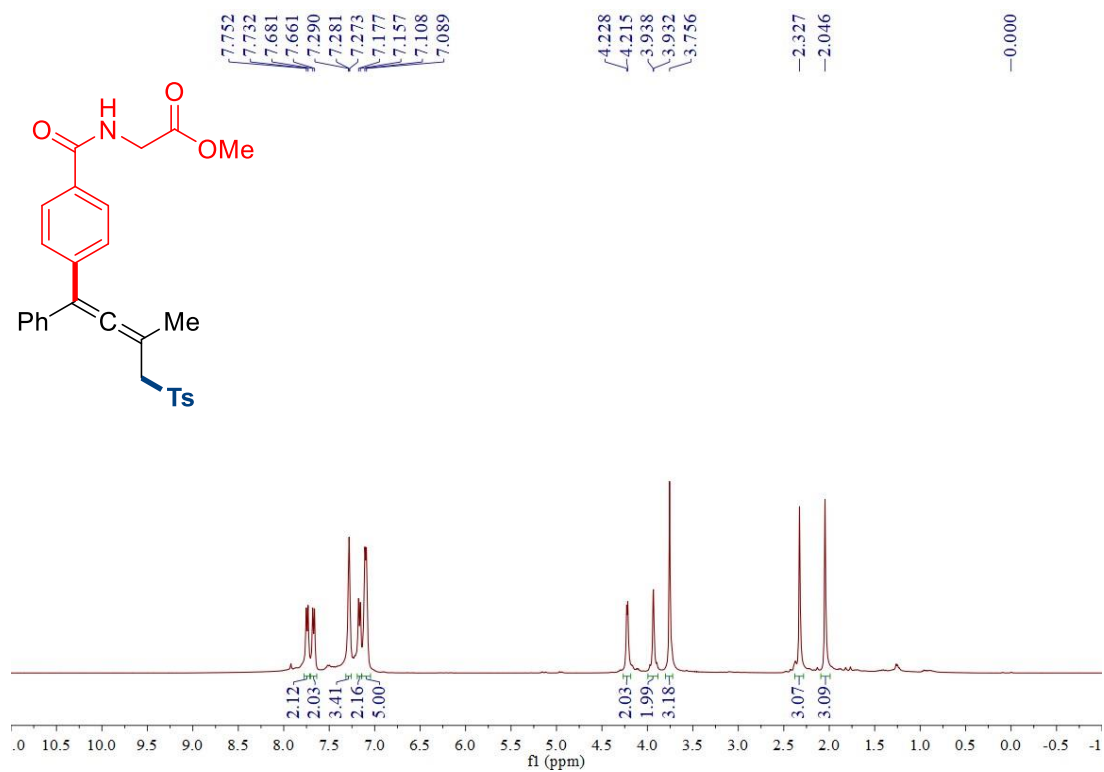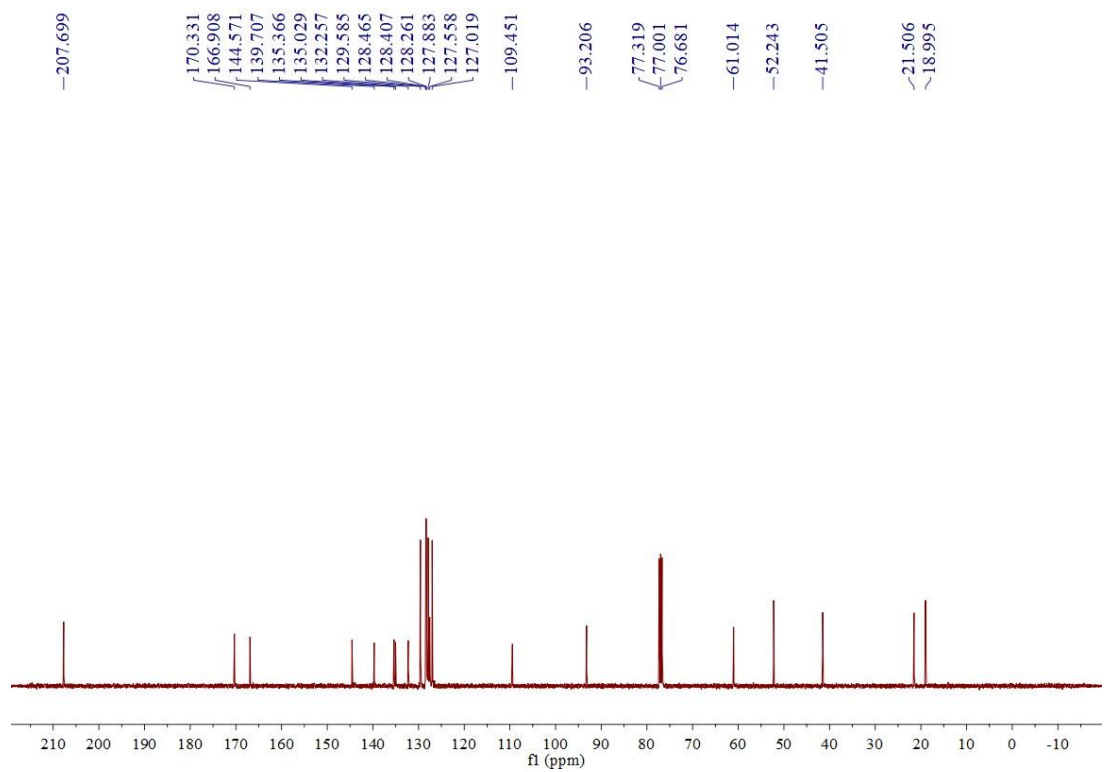

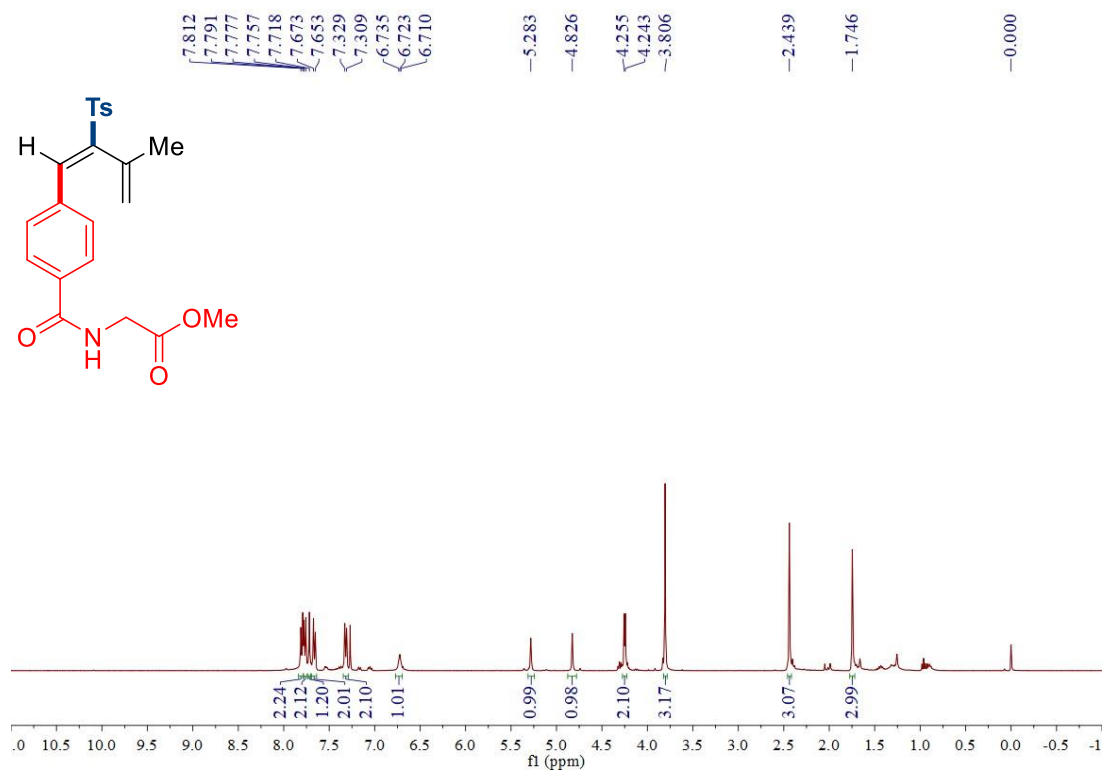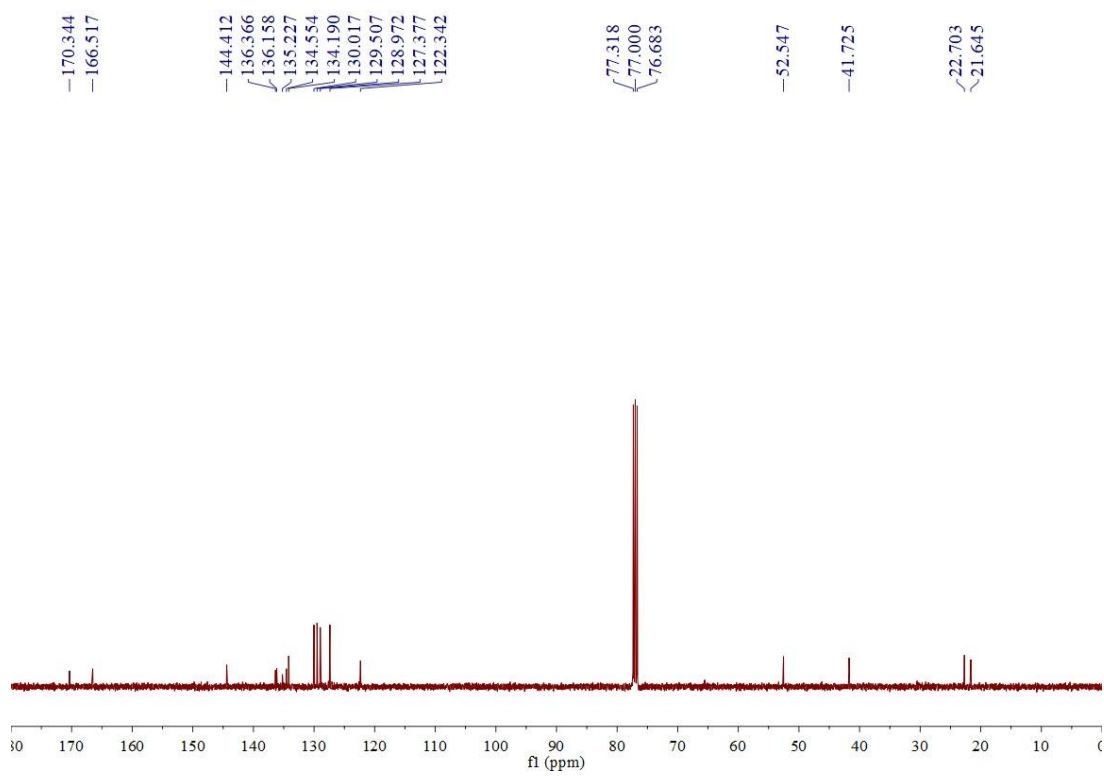

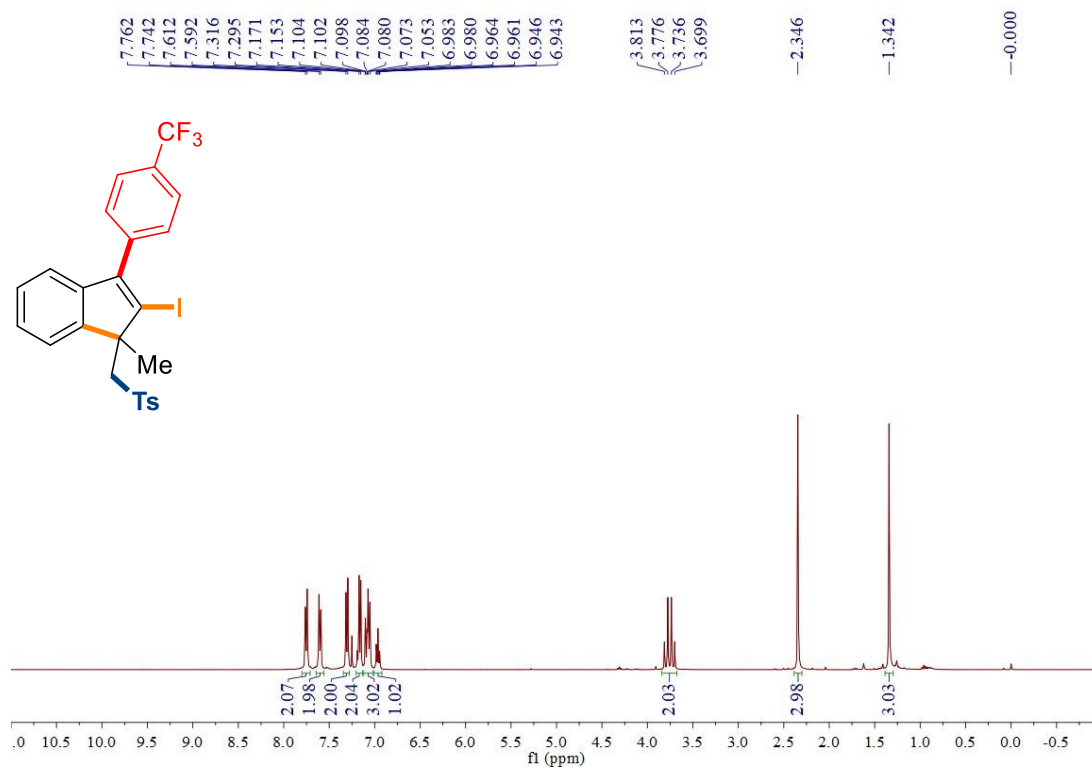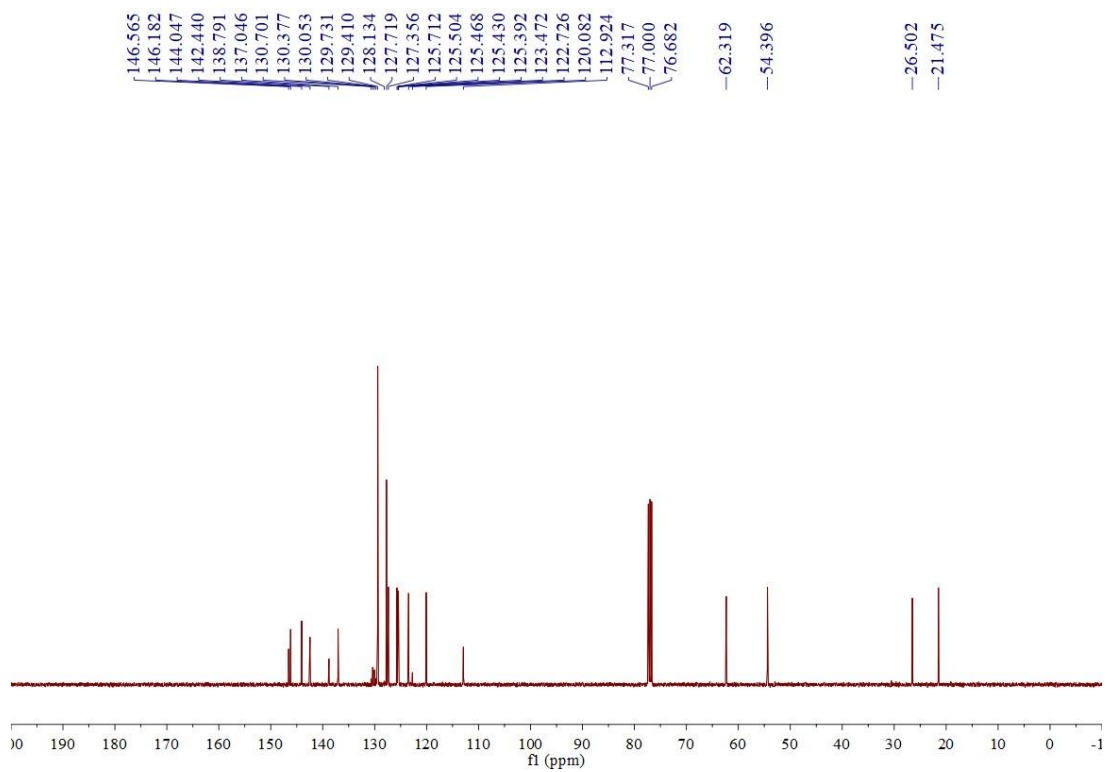

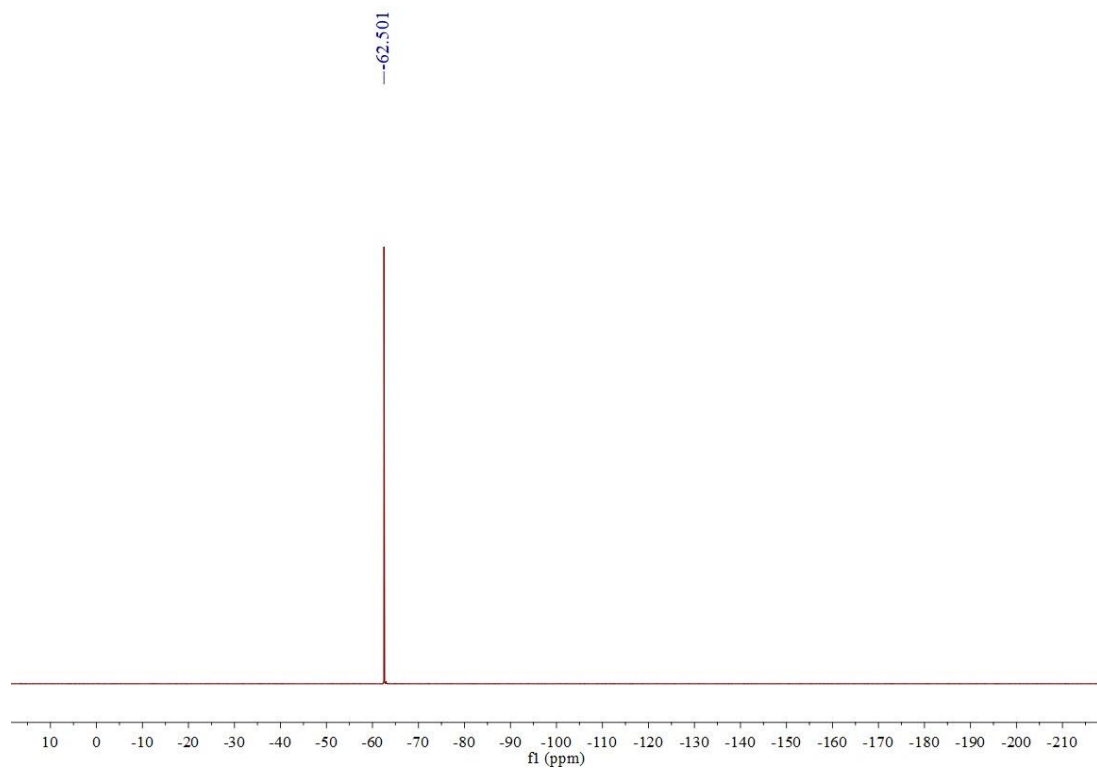

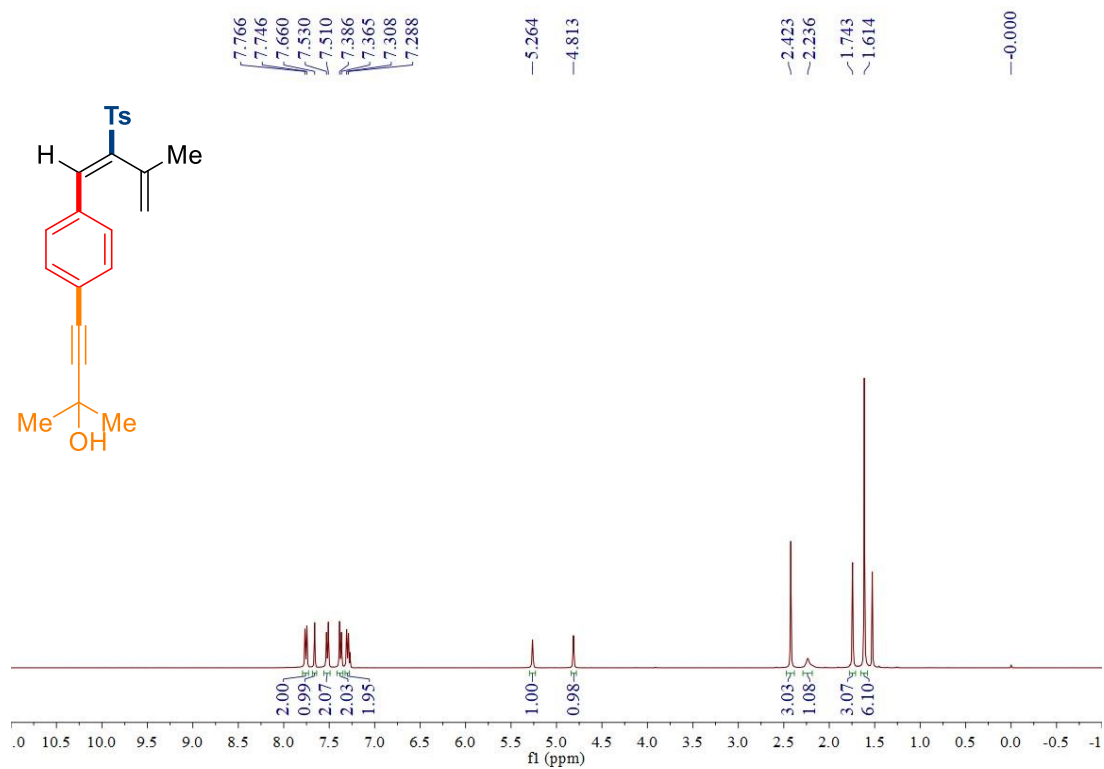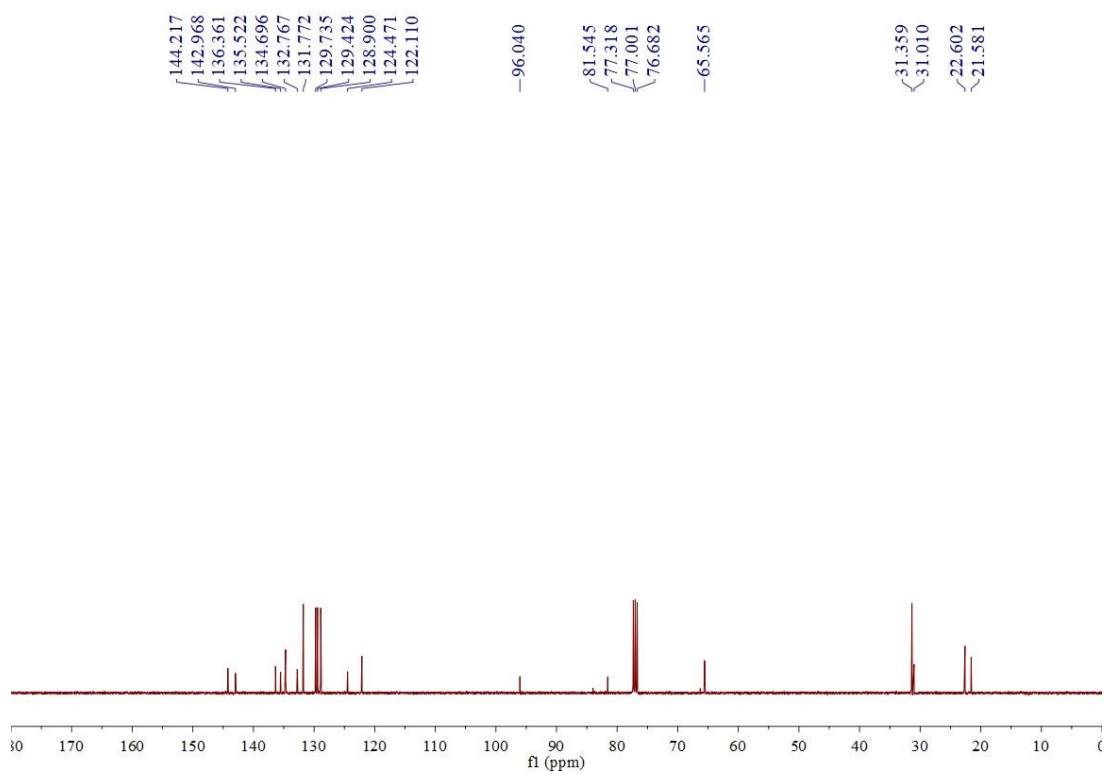

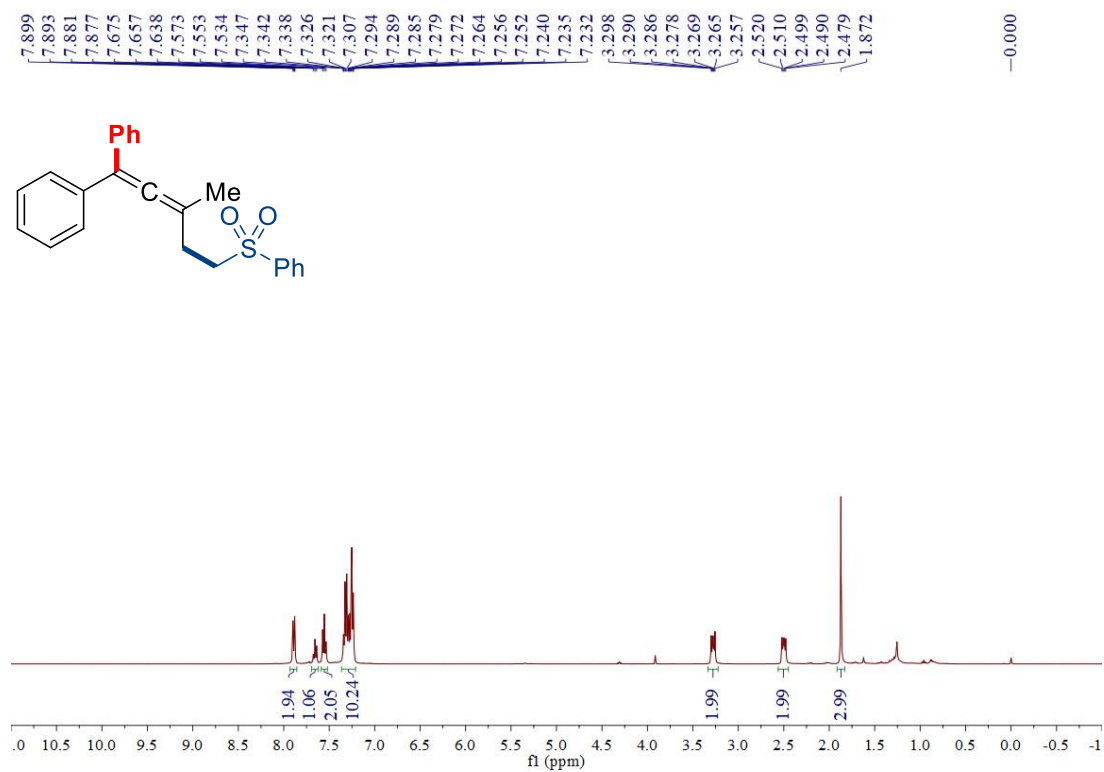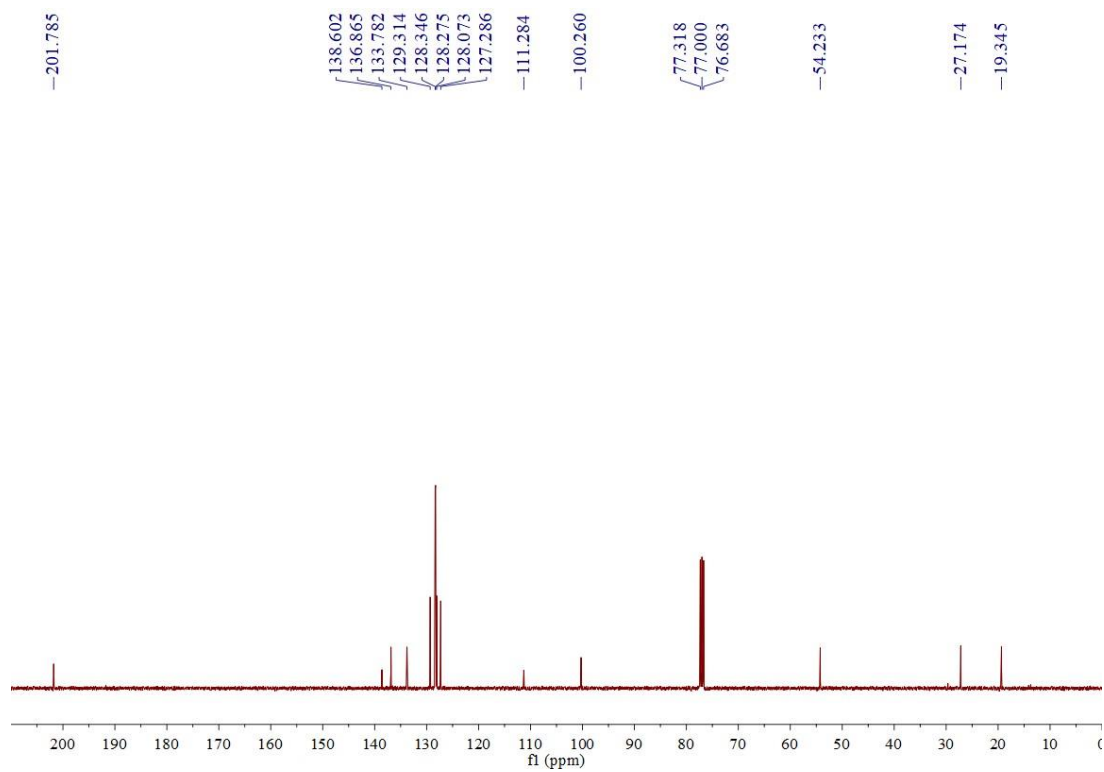

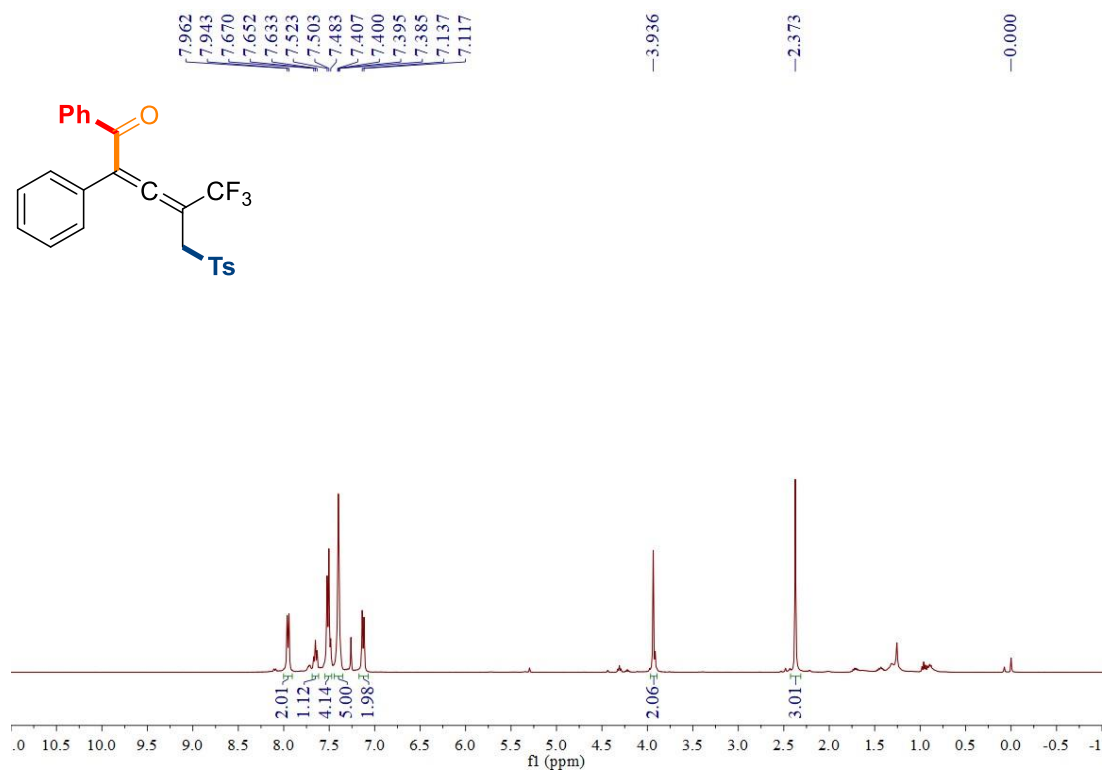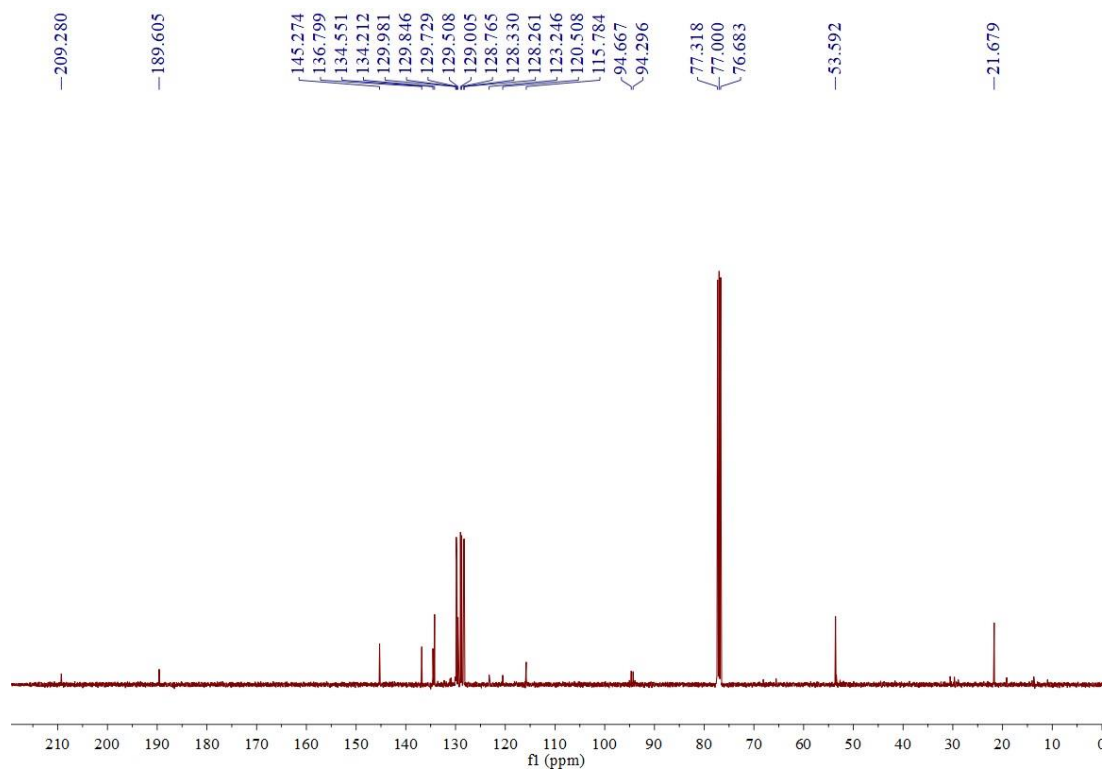



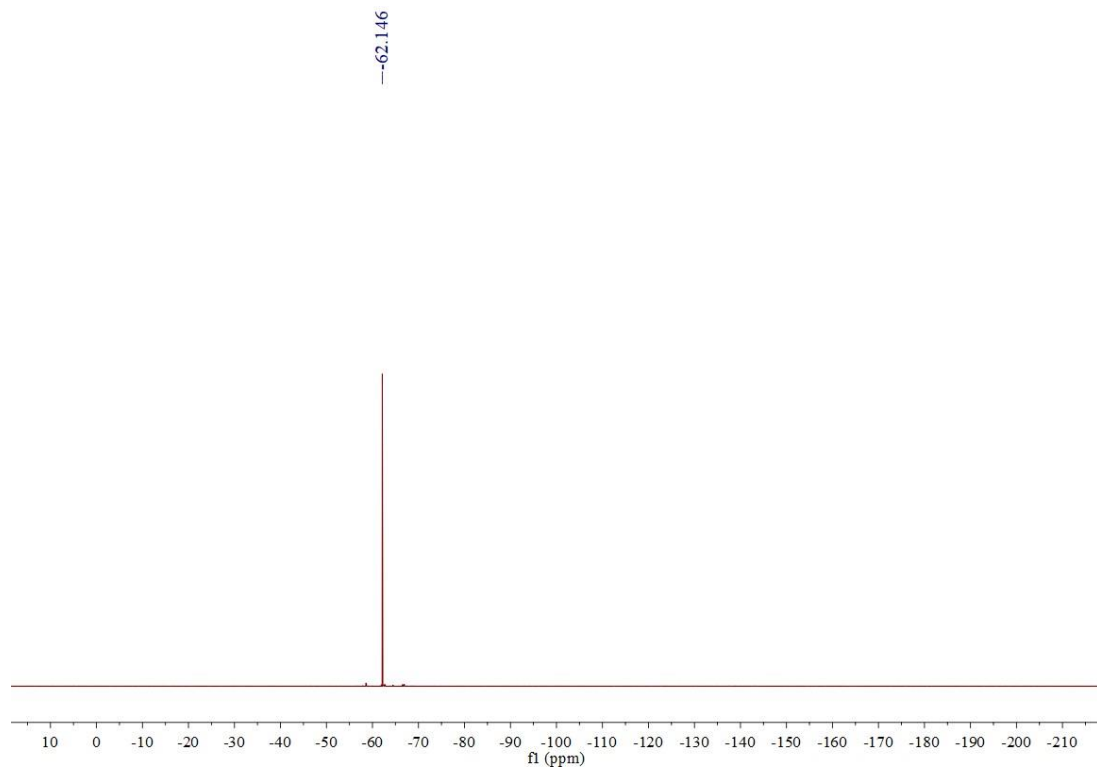

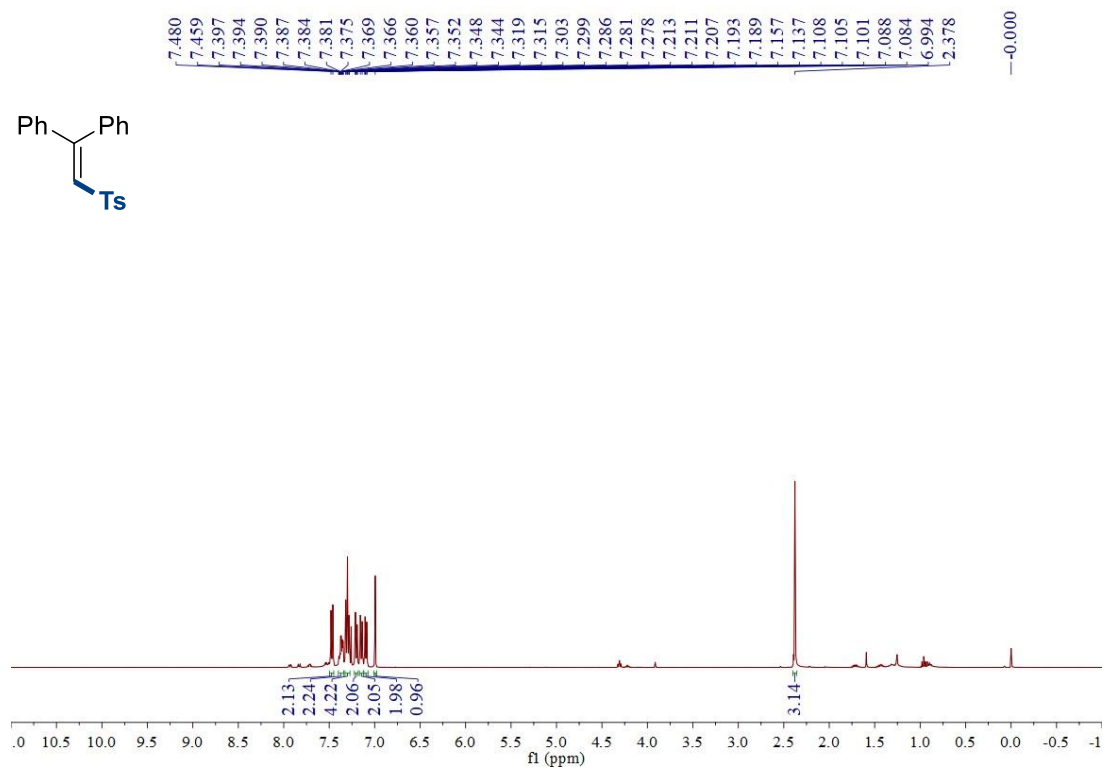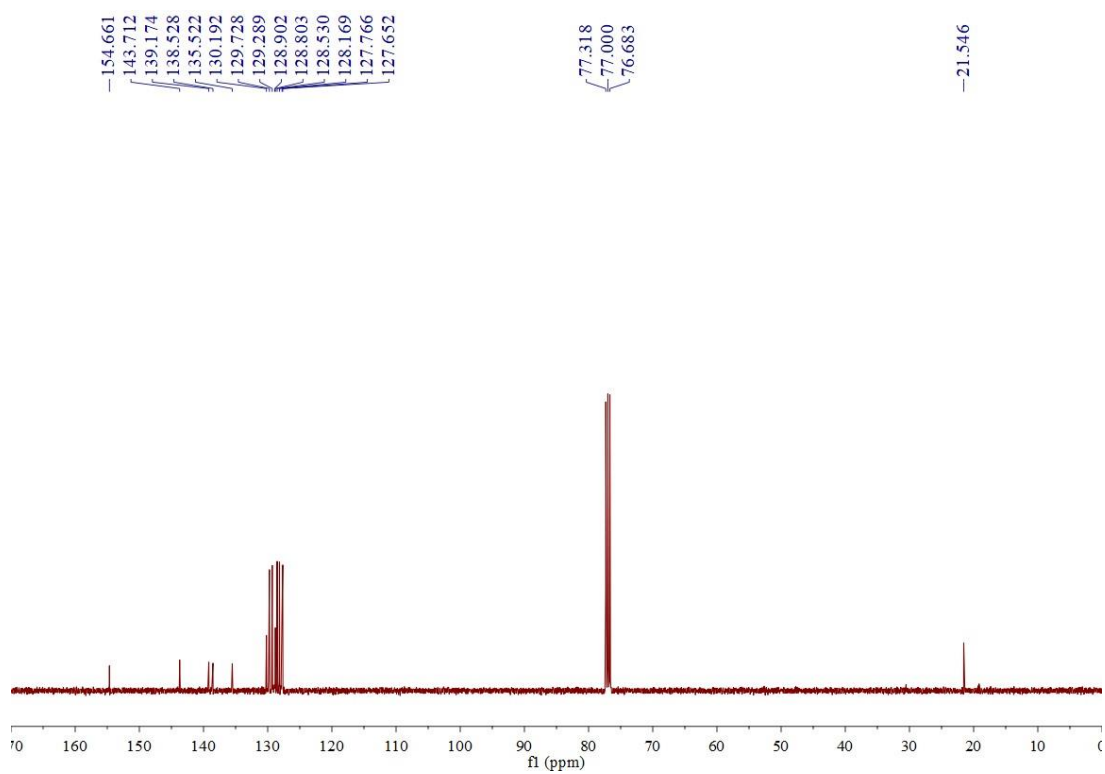

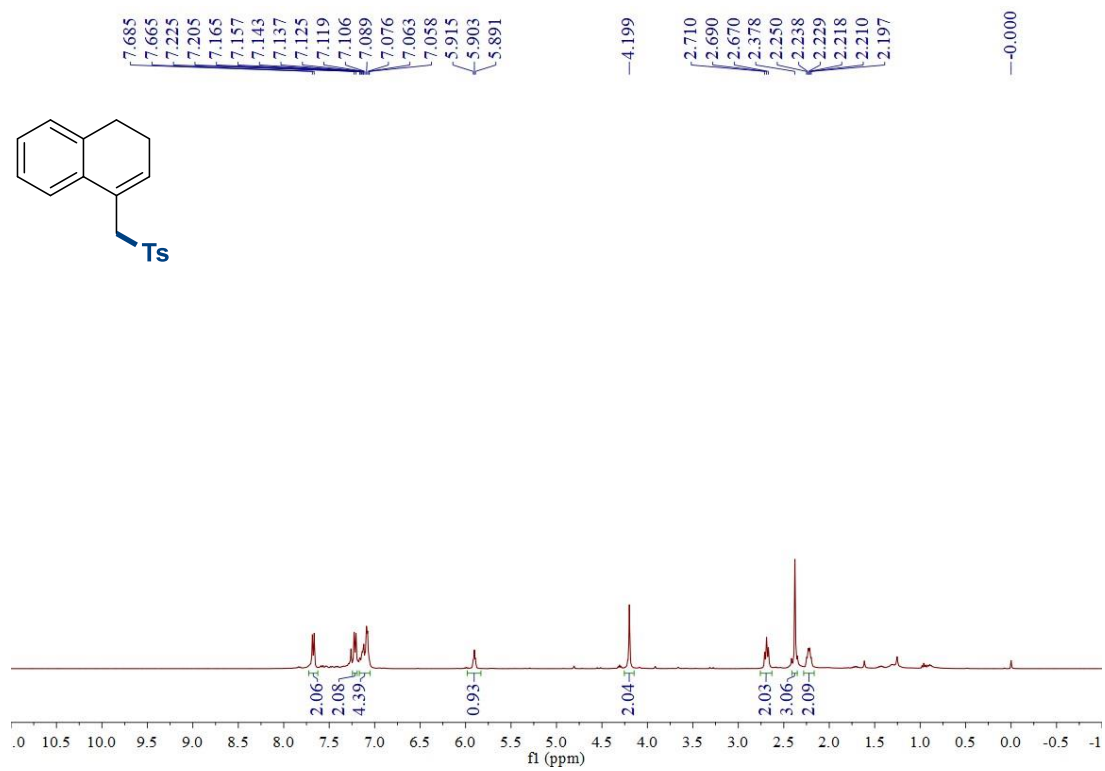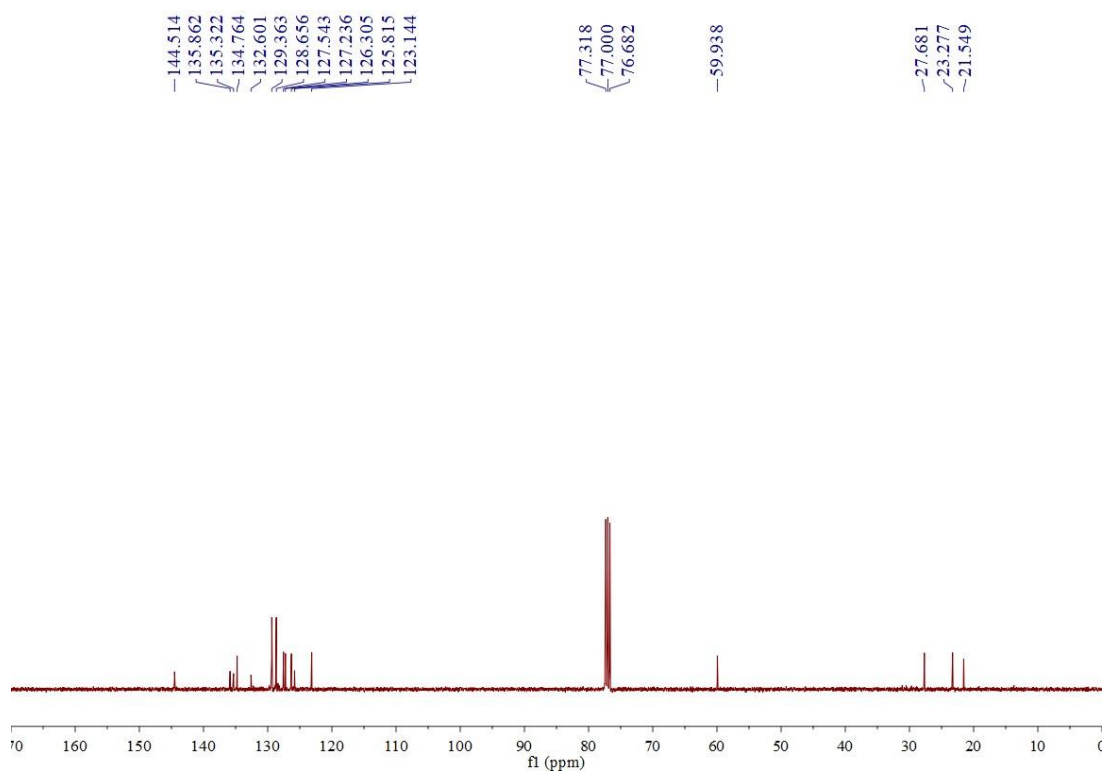

## 6. References

- [1] K.-F. Zhang, K.-J. Bian, C. Li, J. Sheng, Y. Li, X.-S. Wang, *Angew. Chem. Int. Ed.* **2019**, *58*, 5069-5074.
- [2] Y. Chen, K. Zhu, Q. Huang, Y. Lu, *Chem. Sci.* **2021**, *12*, 13564-13571.
- [3] C. Grandclaudeon, V. Michelet, P. Y. Toullec, *Org. Lett.* **2016**, *18*, 676–679.
- [4] X. Li, S. Sun, F. Yang, J. Kang, Y. Wu Y. Wu *Org. Biomol. Chem.*, **2015**, *13*, 2432–2436.
